# Supplementary material for: Glycoproteome remodeling and organelle-specific N-glycosylation accompany neutrophil granulopoiesis
Source: PubMed Central journal article supplement — Proc Natl Acad Sci U S A. 2023 Aug 28;120(36):e2303867120. doi: 10.1073/pnas.2303867120 (PMC10483621; doi:10.1073/pnas.2303867120), 2023-08-28
Supplement: pnas.2303867120.sd03.pdf [file pnas.2303867120.sd03.pdf]

## Dataset S3

for

### **Glycoproteome remodelling and organelle-specific *N*-glycosylation accompany neutrophil granulopoiesis**

Rebeca Kawahara<sup>1,2^</sup>, Julian Ugonotti<sup>1^</sup>, Sayantani Chatterjee<sup>1</sup>, Harry C. Tjondro<sup>1</sup>, Ian Loke<sup>3</sup>, Benjamin L. Parker<sup>4</sup>, Vignesh Venkatakrishnan<sup>5,6</sup>, Regis Dieckmann<sup>5</sup>, Zeynep Sumer-Bayraktar<sup>1</sup>, Anna Karlsson-Bengtsson<sup>5,6</sup>, Johan Bylund<sup>7</sup>, Morten Thaysen-Andersen<sup>1,2\*</sup>

**Dataset S3:** Structural evidence for reported *N*-glycans based on PGC-LC-MS/MS *N*-Glycomics data

# Annotation and fragmentation key

- Mannose (162.0528 Da)
- Galactose (162.0528 Da)
- N-Acetylglucosamine (203.0794 Da)
- N-Acetylgalactosamine (203.0794 Da)
- ◆ N-Acetylneuraminic acid (291.0954 Da)
- ▲ Fucose (146.0579 Da)
-  Cross-ring fragment (unspecified)
-  Indicates mostly Y ions (includes oxygen of glycosidic linkage)
-  Indicates mostly Z ions (excludes oxygen of glycosidic linkage)
-  Reduced reducing end
- P Phosphate

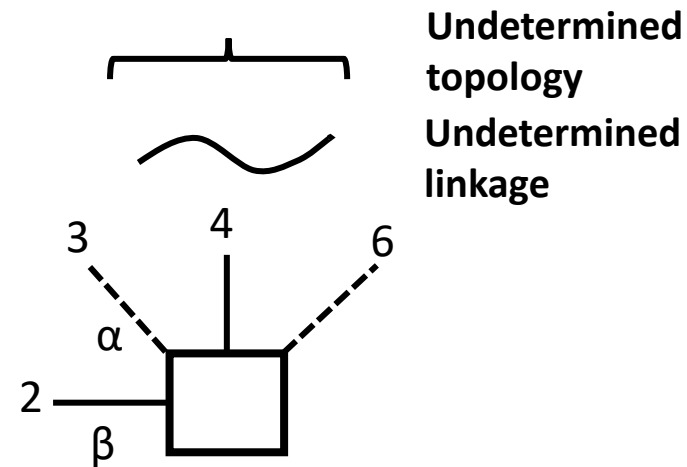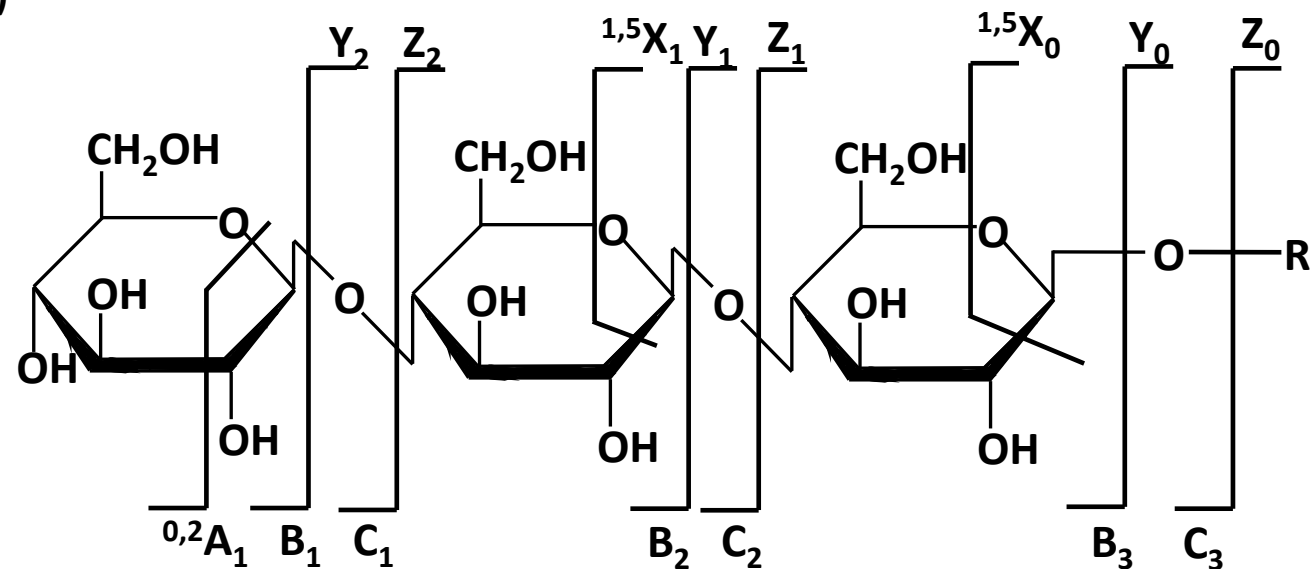

Note 1: All glycans contain reducing end which is not depicted in the reported N-glycan structure cartoon but are shown in the fragments.  
 Note 2: Glycan #1-#3 were not observed with N-glycomics (only with glycopeptide analysis), hence have been left out here.

Glycan #4  
 Chitobiose core  
 HexNAc<sub>2</sub>Fuc<sub>1</sub> (MOF)  
*m/z*: 571.3 (1-)

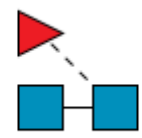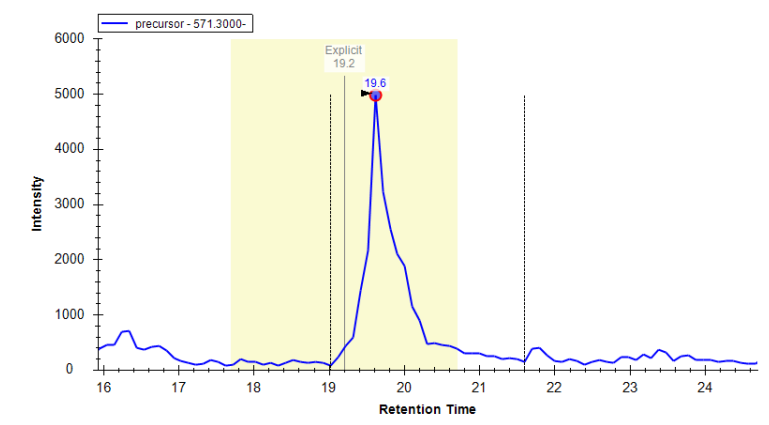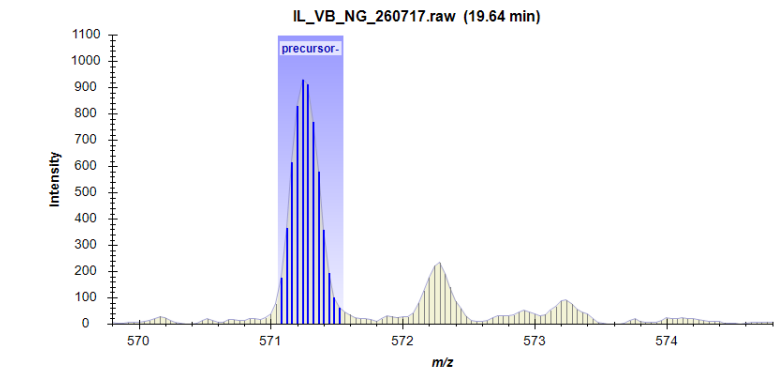

IL\_VB\_NG\_260717 #1972 RT: 19.65 AV: 1 NL: 1.57E2  
 F: ITMS - p ESI d Full ms2 571.22@cid35.00 [145.00-1155.00]

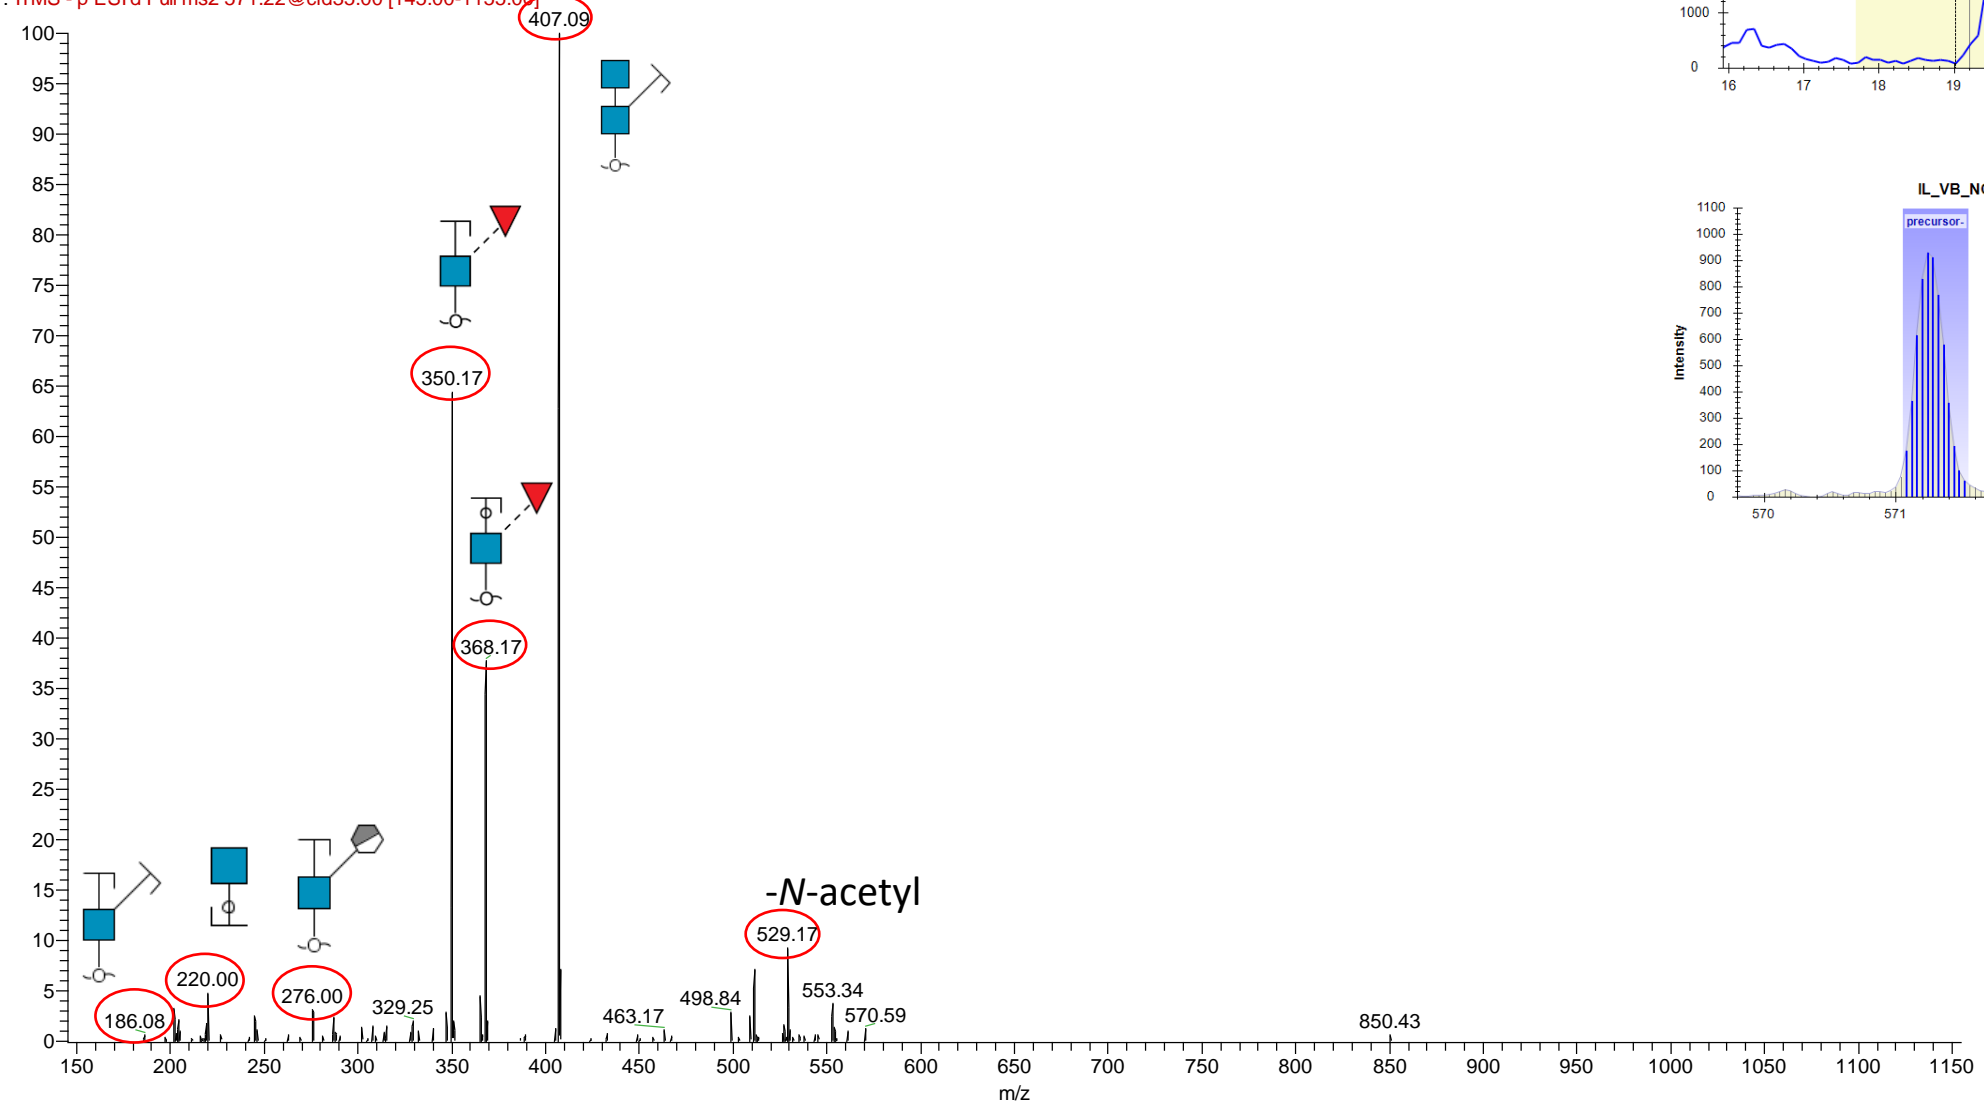

-N-acetyl

# Glycan #5

## Paucimannose

### Hex<sub>1</sub>HexNAc<sub>2</sub> (M1)

*m/z*: 587.2 (1-)

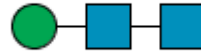

IL\_YA\_NG\_260717 #1500 RT: 14.96 AV: 1 NL: 1.21E1  
F: ITMS - p ESI d Full ms2 587.27 @cid35.00 [150.00-1185.00]

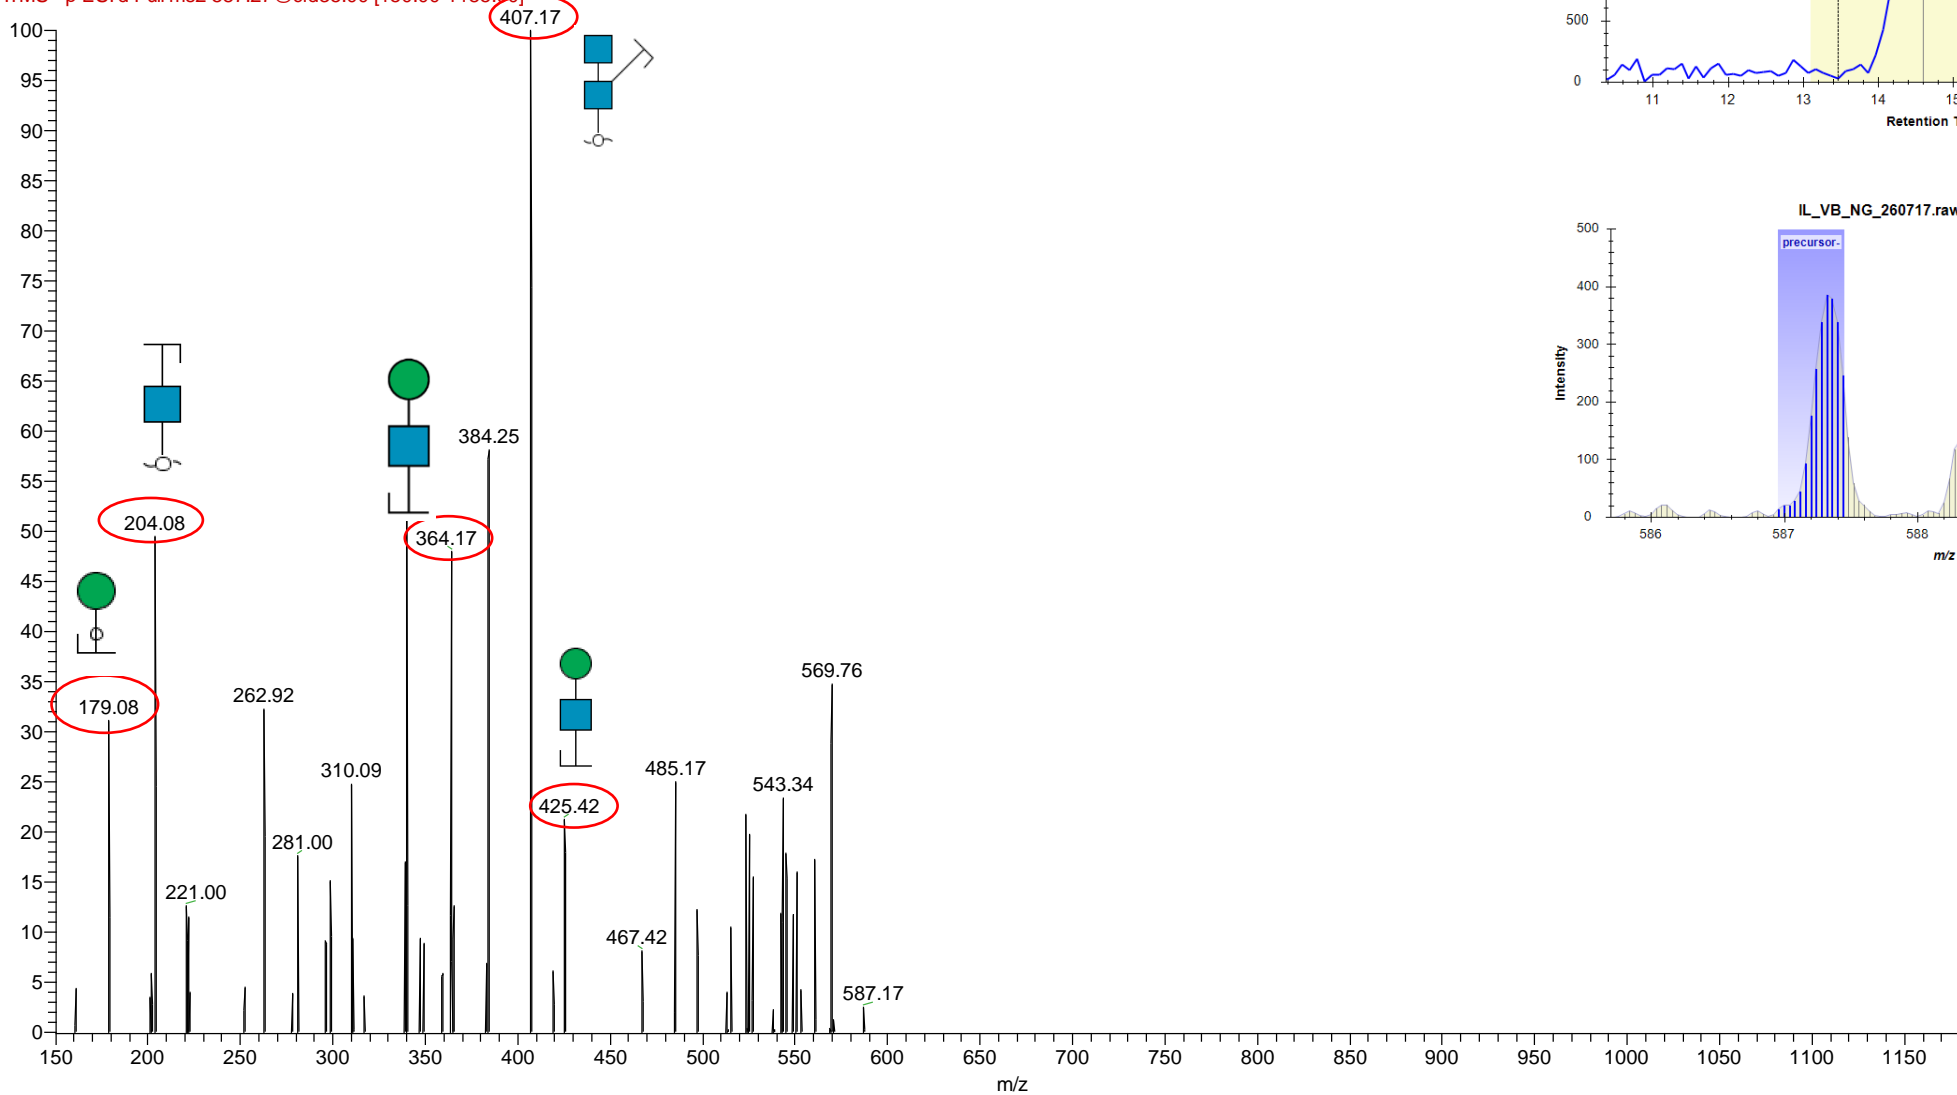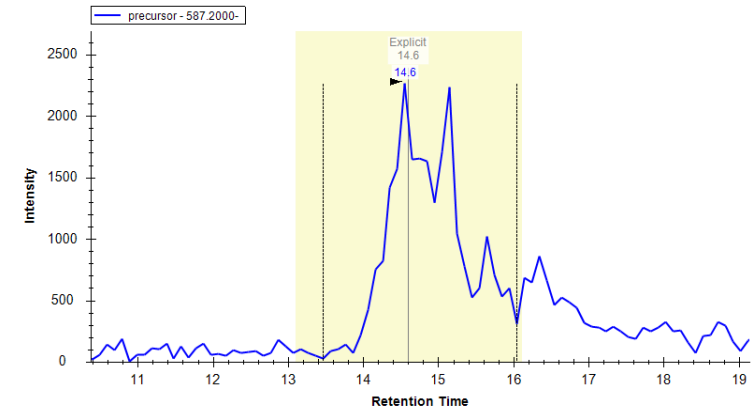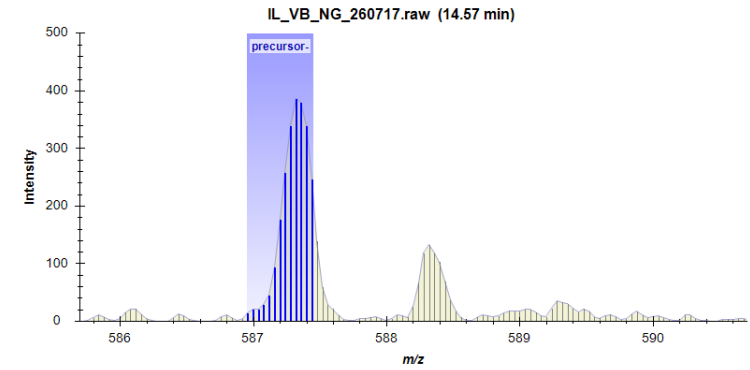

# Glycan #6

Paucimannose

Hex<sub>1</sub>HexNAc<sub>2</sub>Fuc<sub>1</sub> (M1F)

*m/z*: 733.3 (1-)

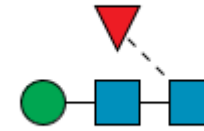

IL\_VB\_NG\_260717 #3062 RT: 30.52 AV: 1 NL: 1.33E2  
F: ITMS - p ESI d Full ms2 733.26@cid35.00 [190.00-1480.00]

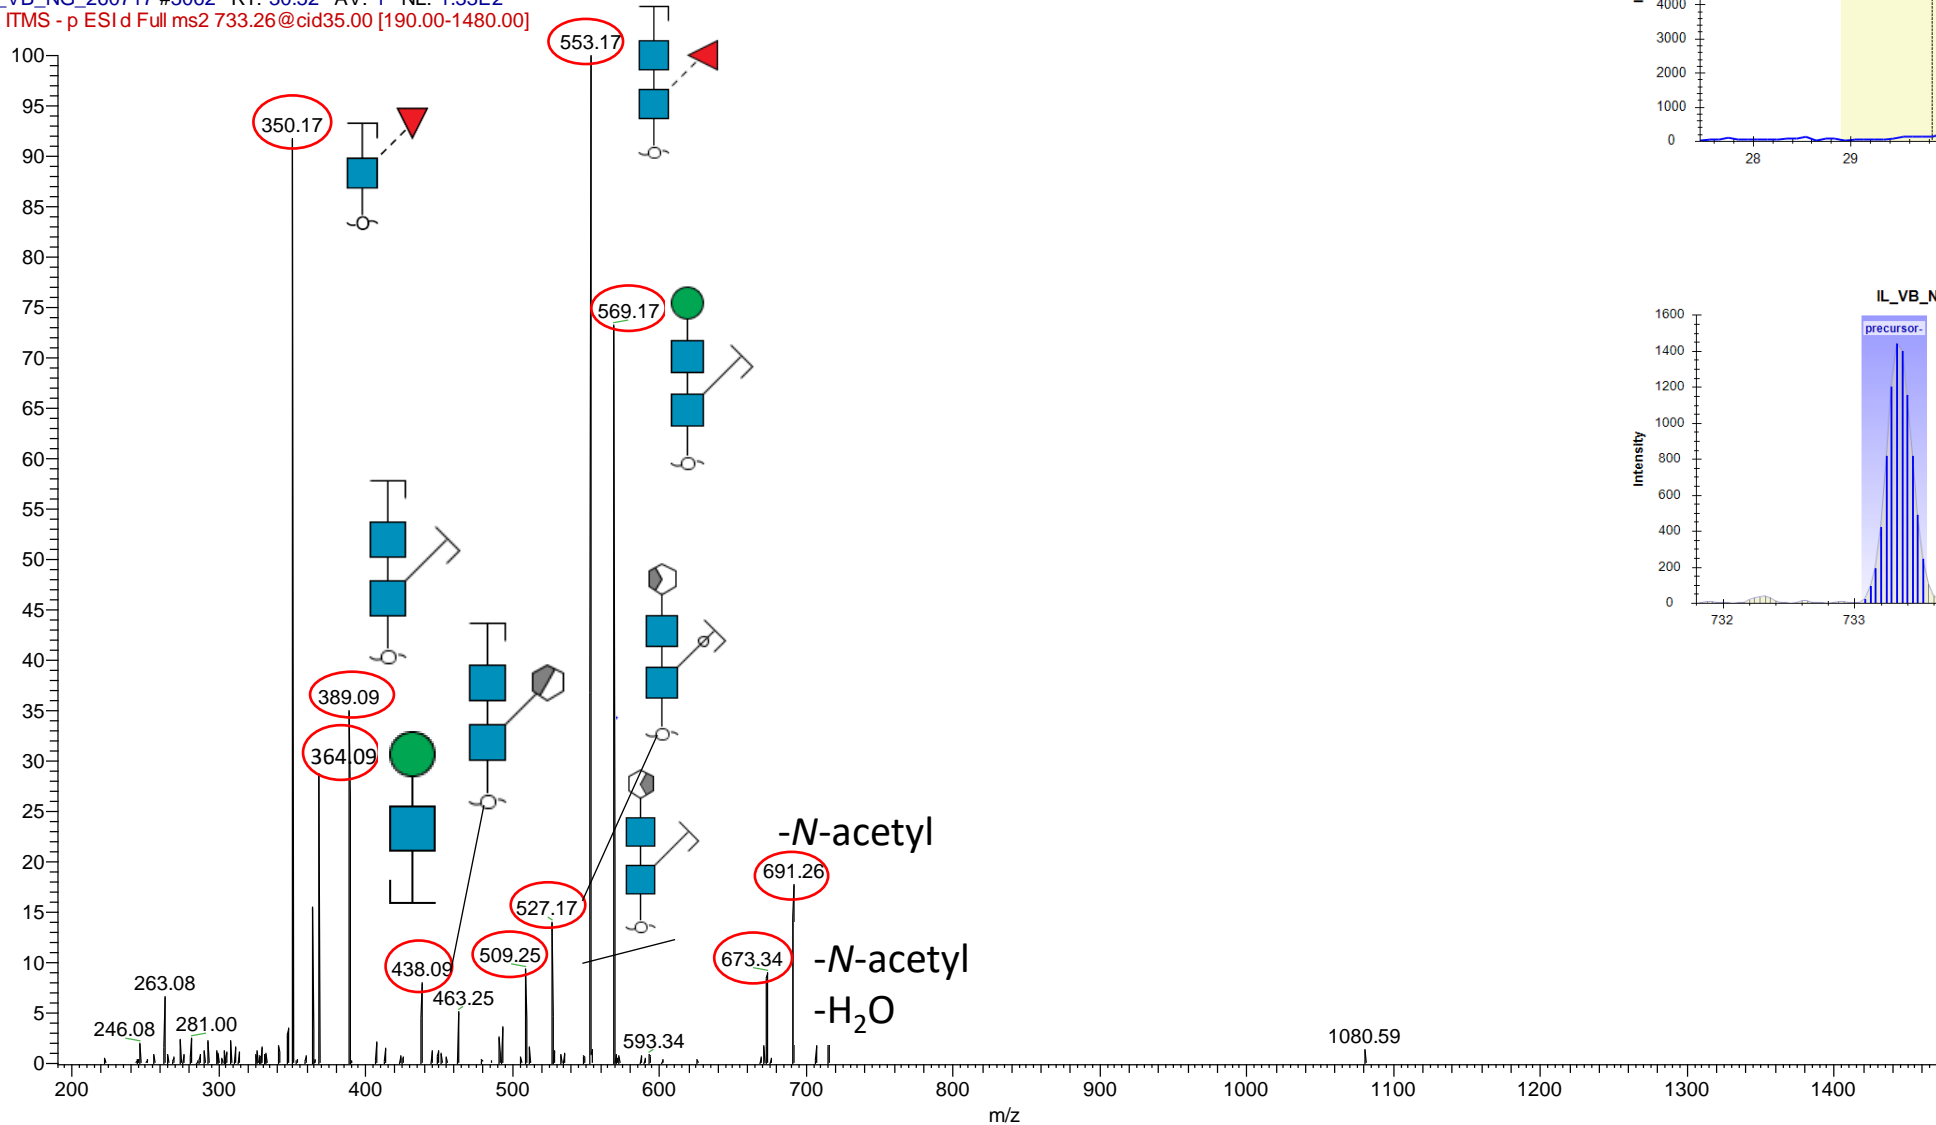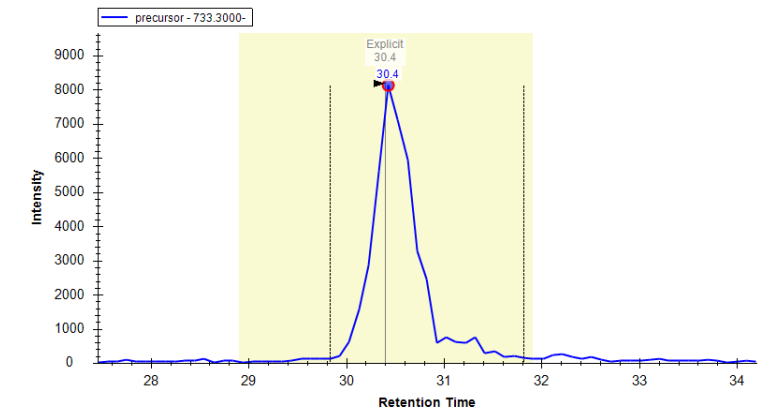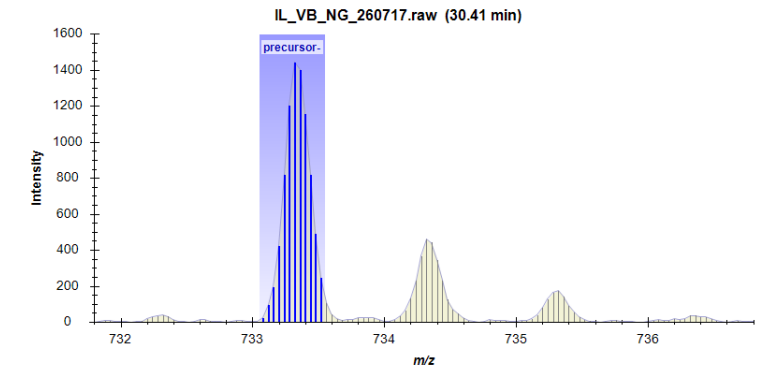

Glycan #7  
 Paucimannose  
 Hex<sub>2</sub>HexNAc<sub>2</sub> (M2)  
 m/z: 749.3 (1-)

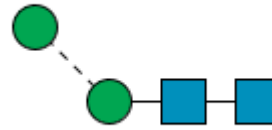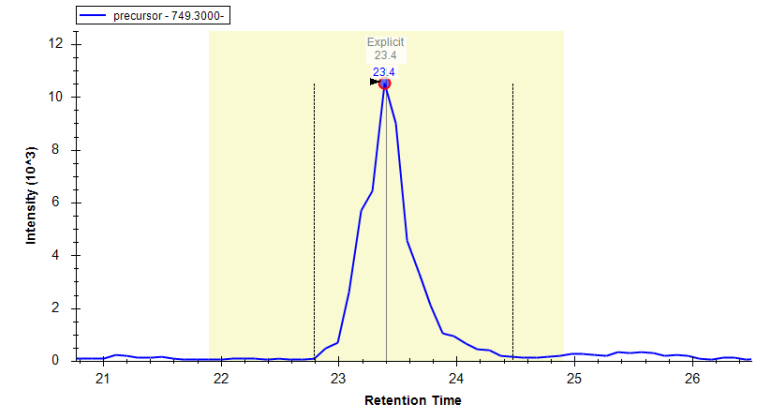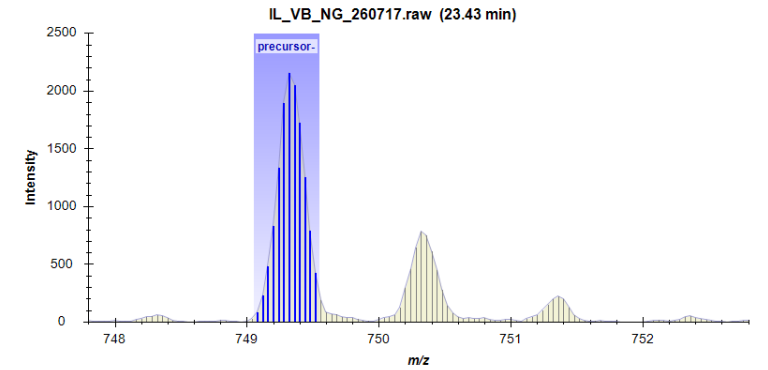

Note: Determined as alpha1,6-arm structure based on past observations reported in other neutrophil N-glycome studies

IL\_VB\_NG\_260717#2352 RT: 23.43 AV: 1 NL: 5.16E1  
 F: ITMS - p ESI d Full ms2 749.32 @cid35.00 [195.00-1510.00]

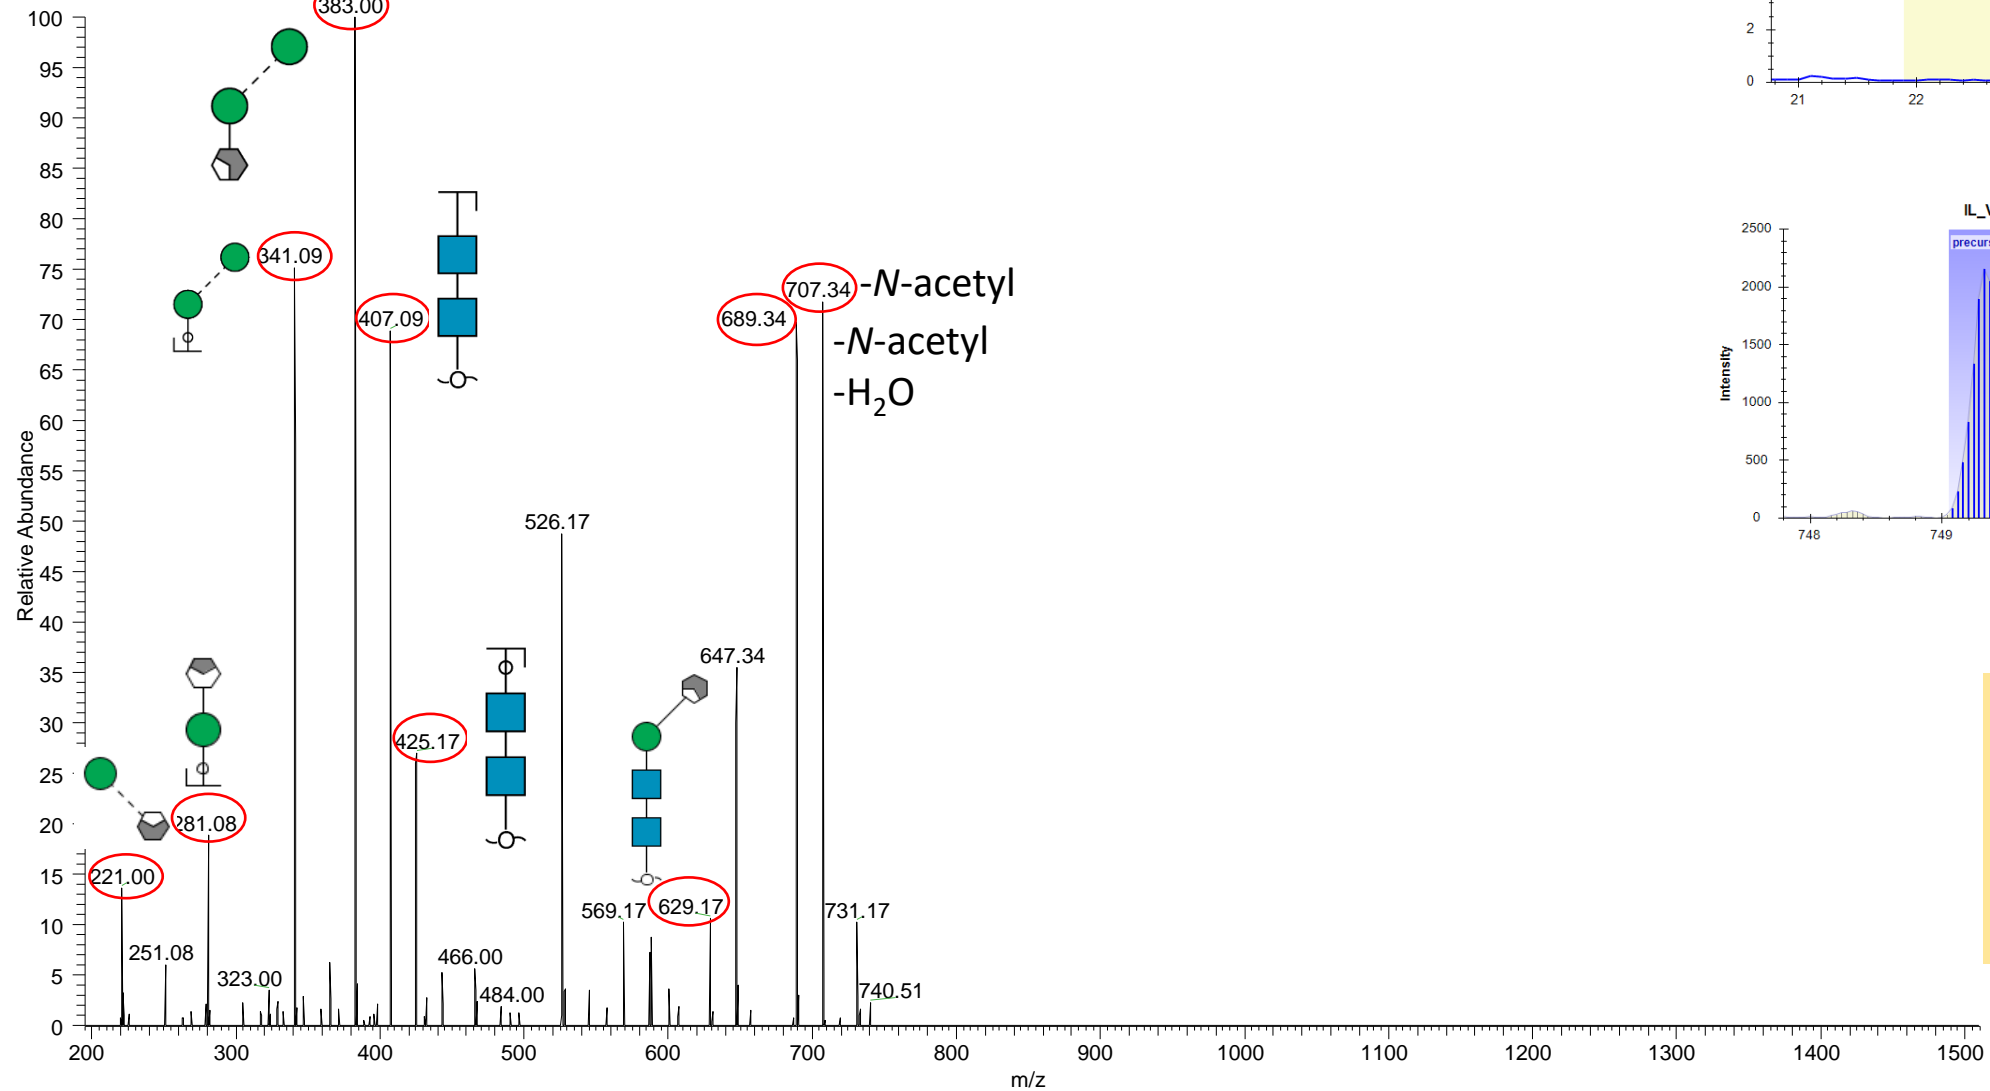

**Glycan #8**  
**Paucimannose**  
**Hex<sub>2</sub>HexNAc<sub>2</sub>Fuc<sub>1</sub> (M2F)**  
***m/z*: 895.4 (1<sup>-</sup>)**

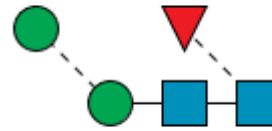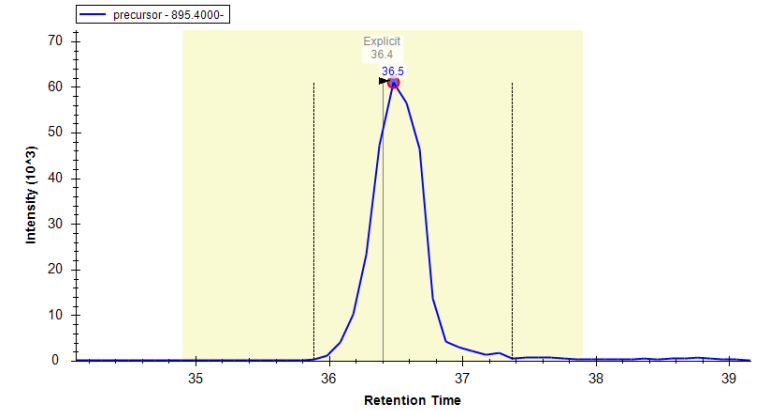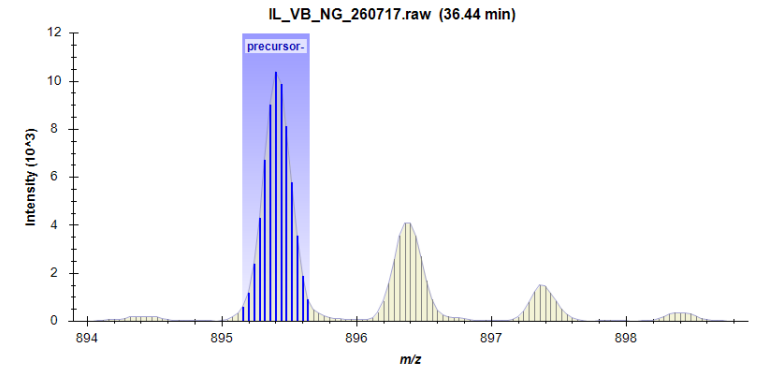

Note: Determined as alpha1,6-arm structure based on past observations reported in other neutrophil N-glycome studies

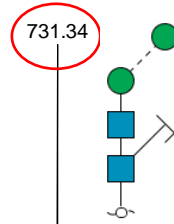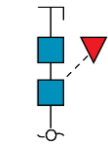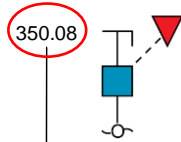

853.34 -N-acetyl

835.34 -N-acetyl  
 -H<sub>2</sub>O

IL\_VB\_NG\_260717 #3642 RT: 36.45 AV: 1 NL: 4.34E2  
 F: ITMS - p ESI d Full ms2 895.39@cid35.00 [235.00-1805.00]

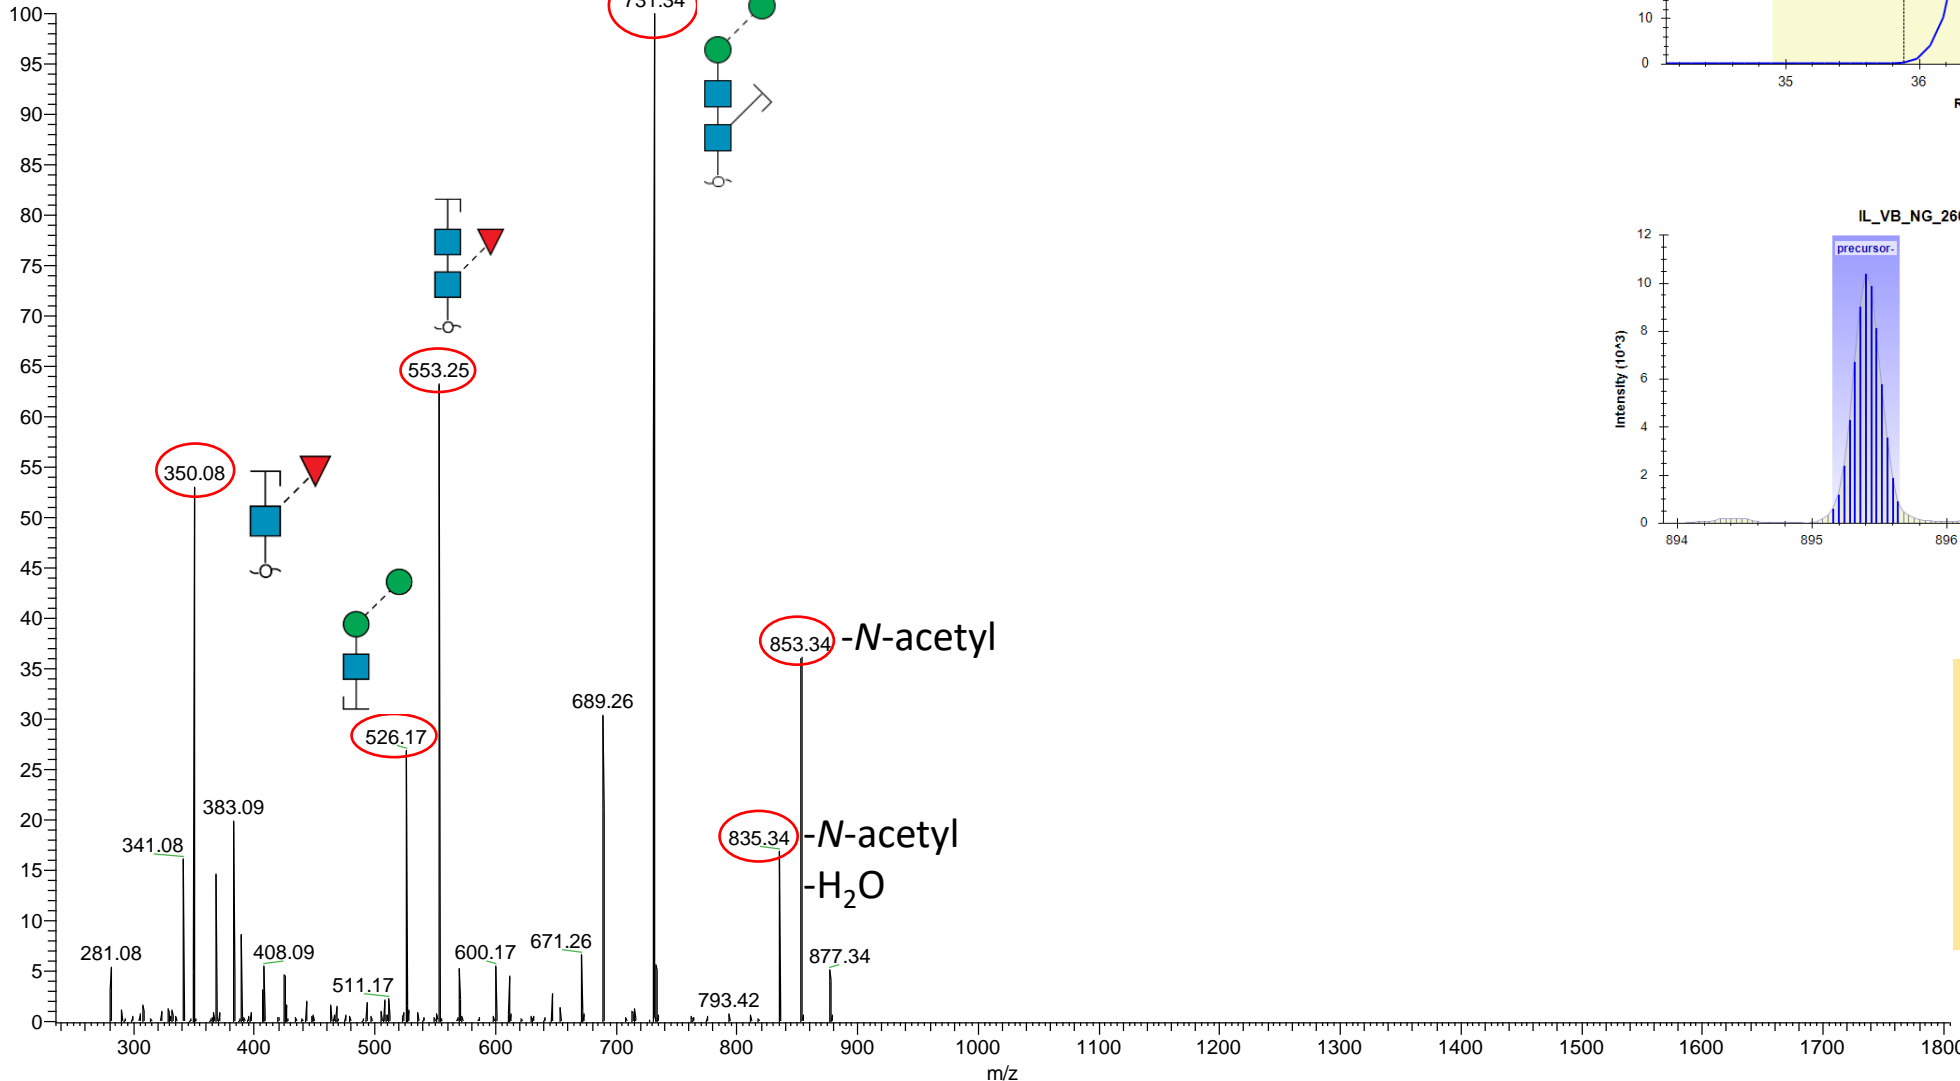

Glycan #9  
 Paucimannose  
 Hex<sub>3</sub>HexNAc<sub>2</sub> (M3)  
 m/z: 911.4 (1<sup>-</sup>)

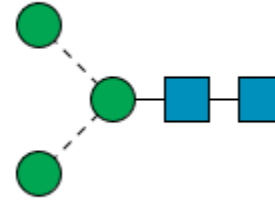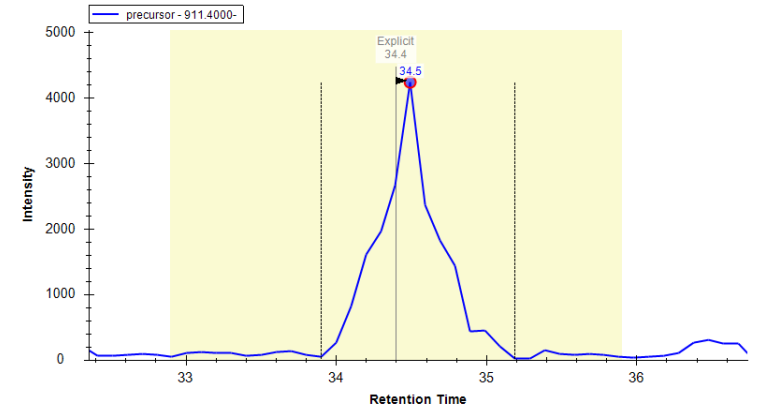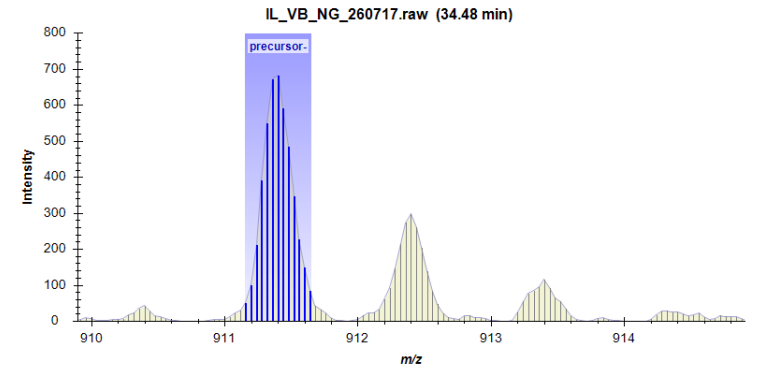

IL\_VB\_NG\_260717 #3452 RT: 34.49 AV: 1 NL: 3.76E1  
 F: ITMS - p ESI d Full ms2 911.38@cid35.00 [240.00-1835.00]

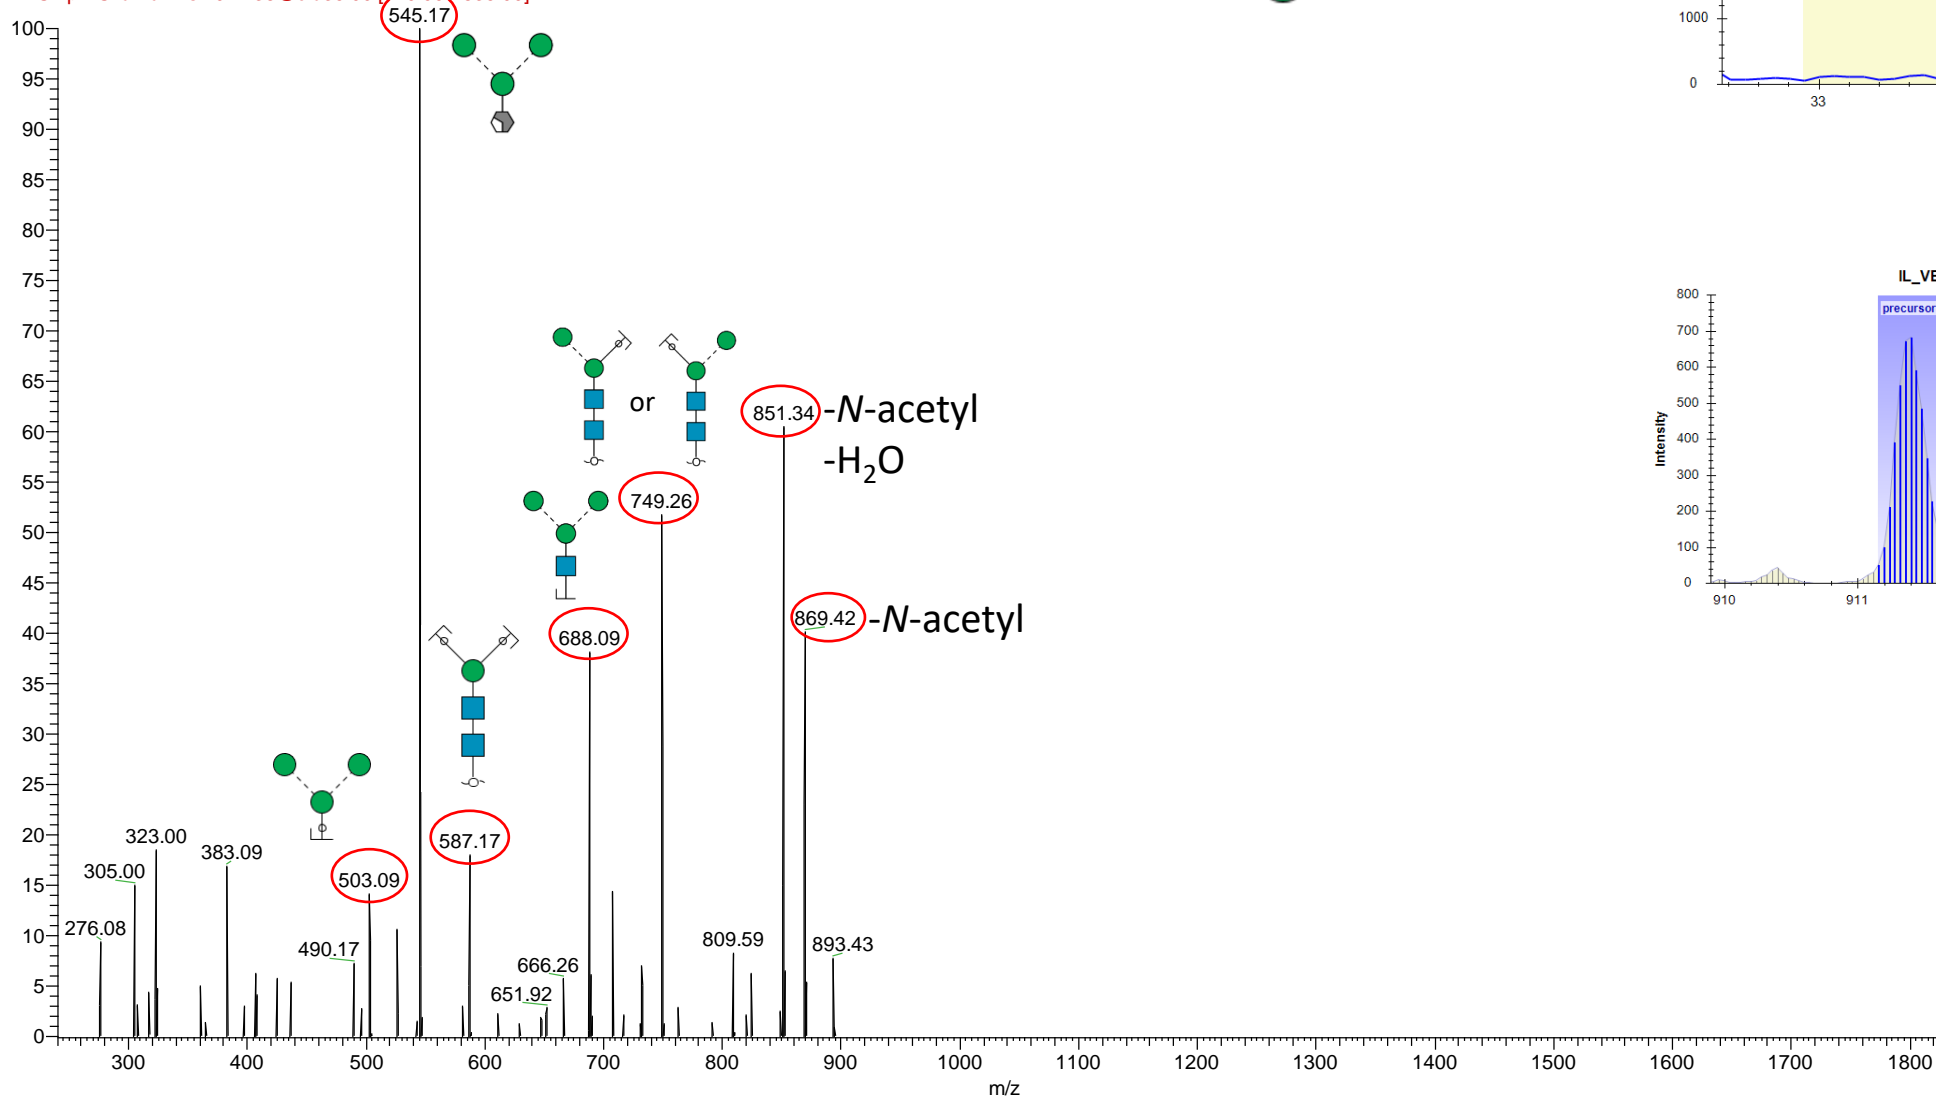



# Glycan #10

## Paucimannose

### Hex<sub>3</sub>HexNAc<sub>2</sub>Fuc<sub>1</sub> (M3F)

*m/z*: 1057.4<sup>(1-)</sup>

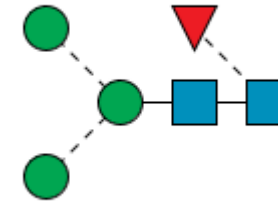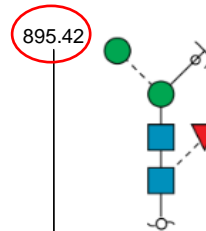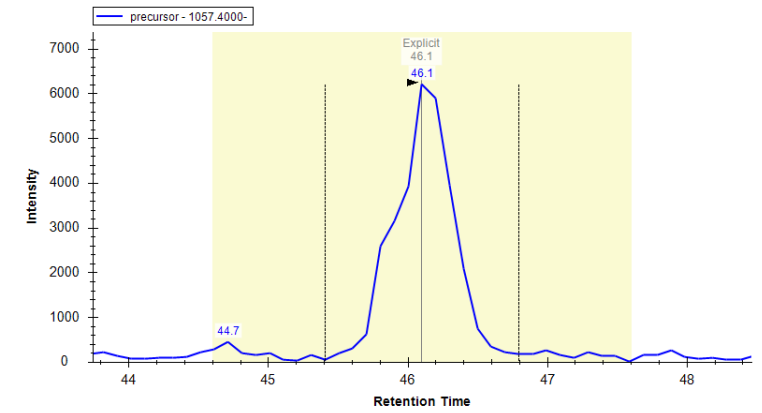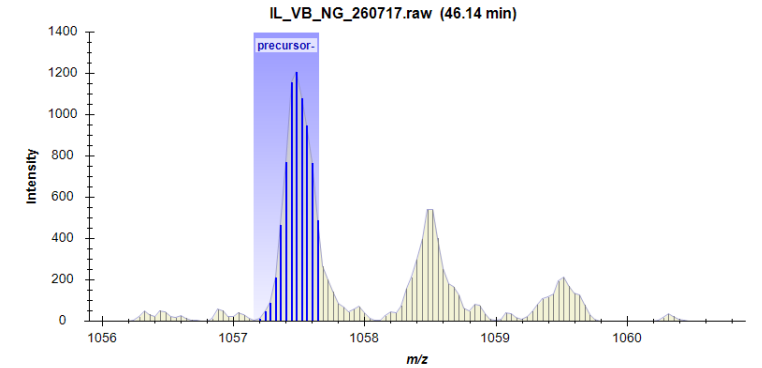

L\_VB\_NG\_260717 #4583 RT: 46.05 AV: 1 NL: 3.97E1  
 F: ITMS - p ESI d Full ms2 1057.44@cid35.00 [280.00-2000.00]

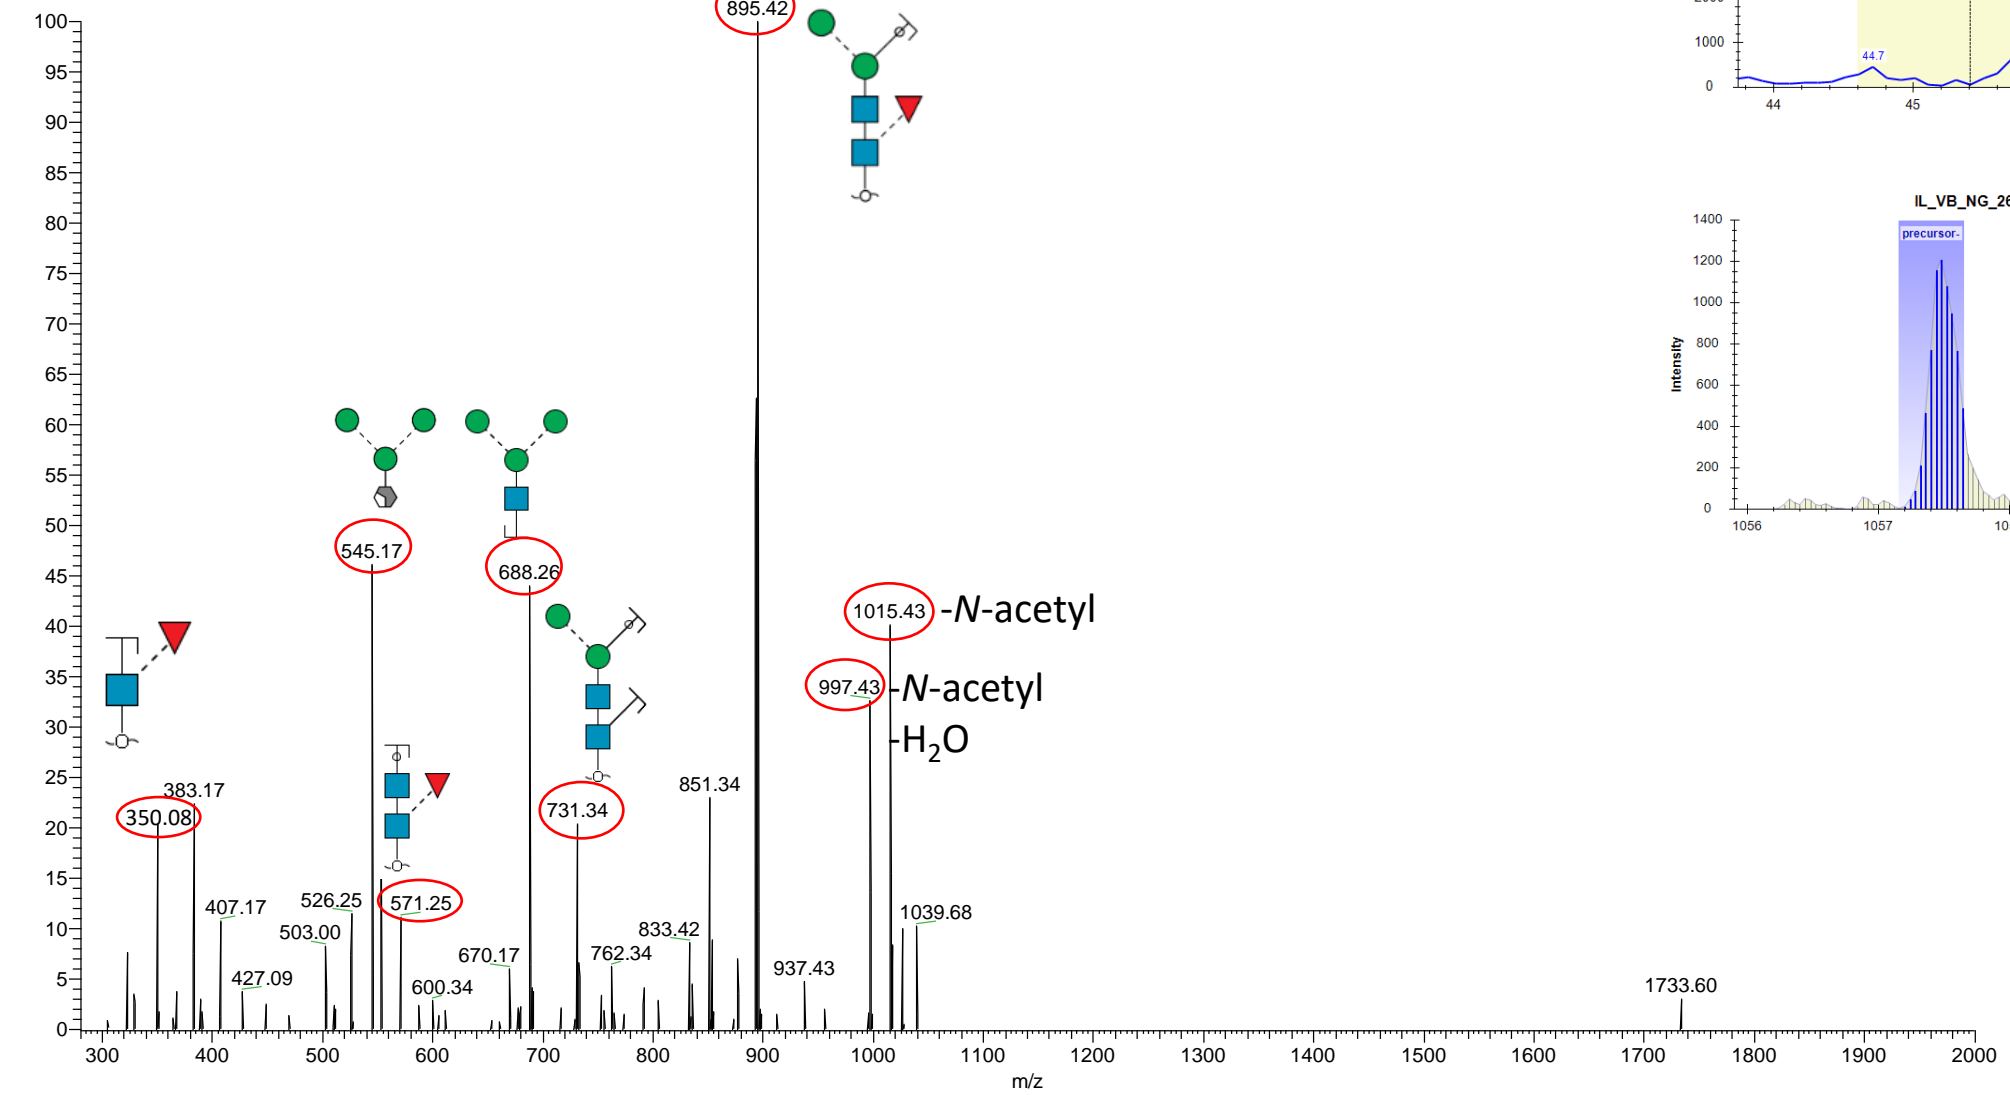

Glycan #11a  
 Oligomannose  
 Hex<sub>4</sub>HexNAc<sub>2</sub> (Man4)  
 m/z: 1073.4 (1-)

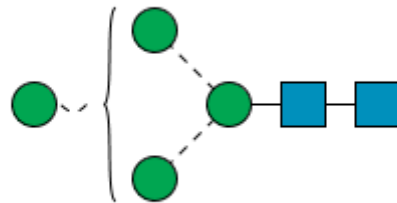

IL\_VB\_NG\_260717 #2990 RT: 29.80 AV: 1 NL: 1.26E1  
 F: ITMS - p ESI d Full ms2 1073.47 @ cid 35.00 [285.00-2000.00]

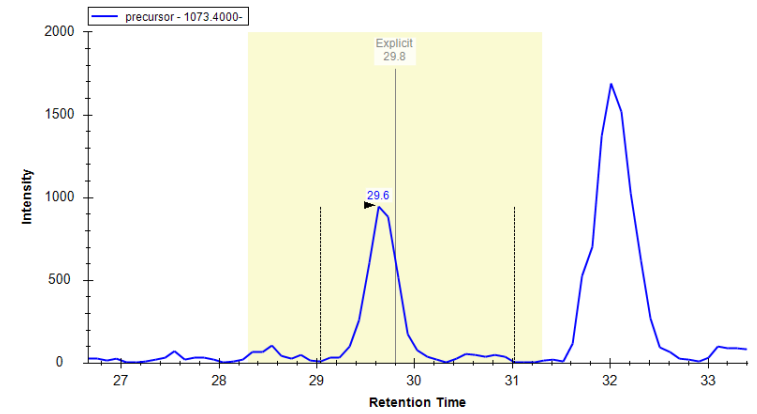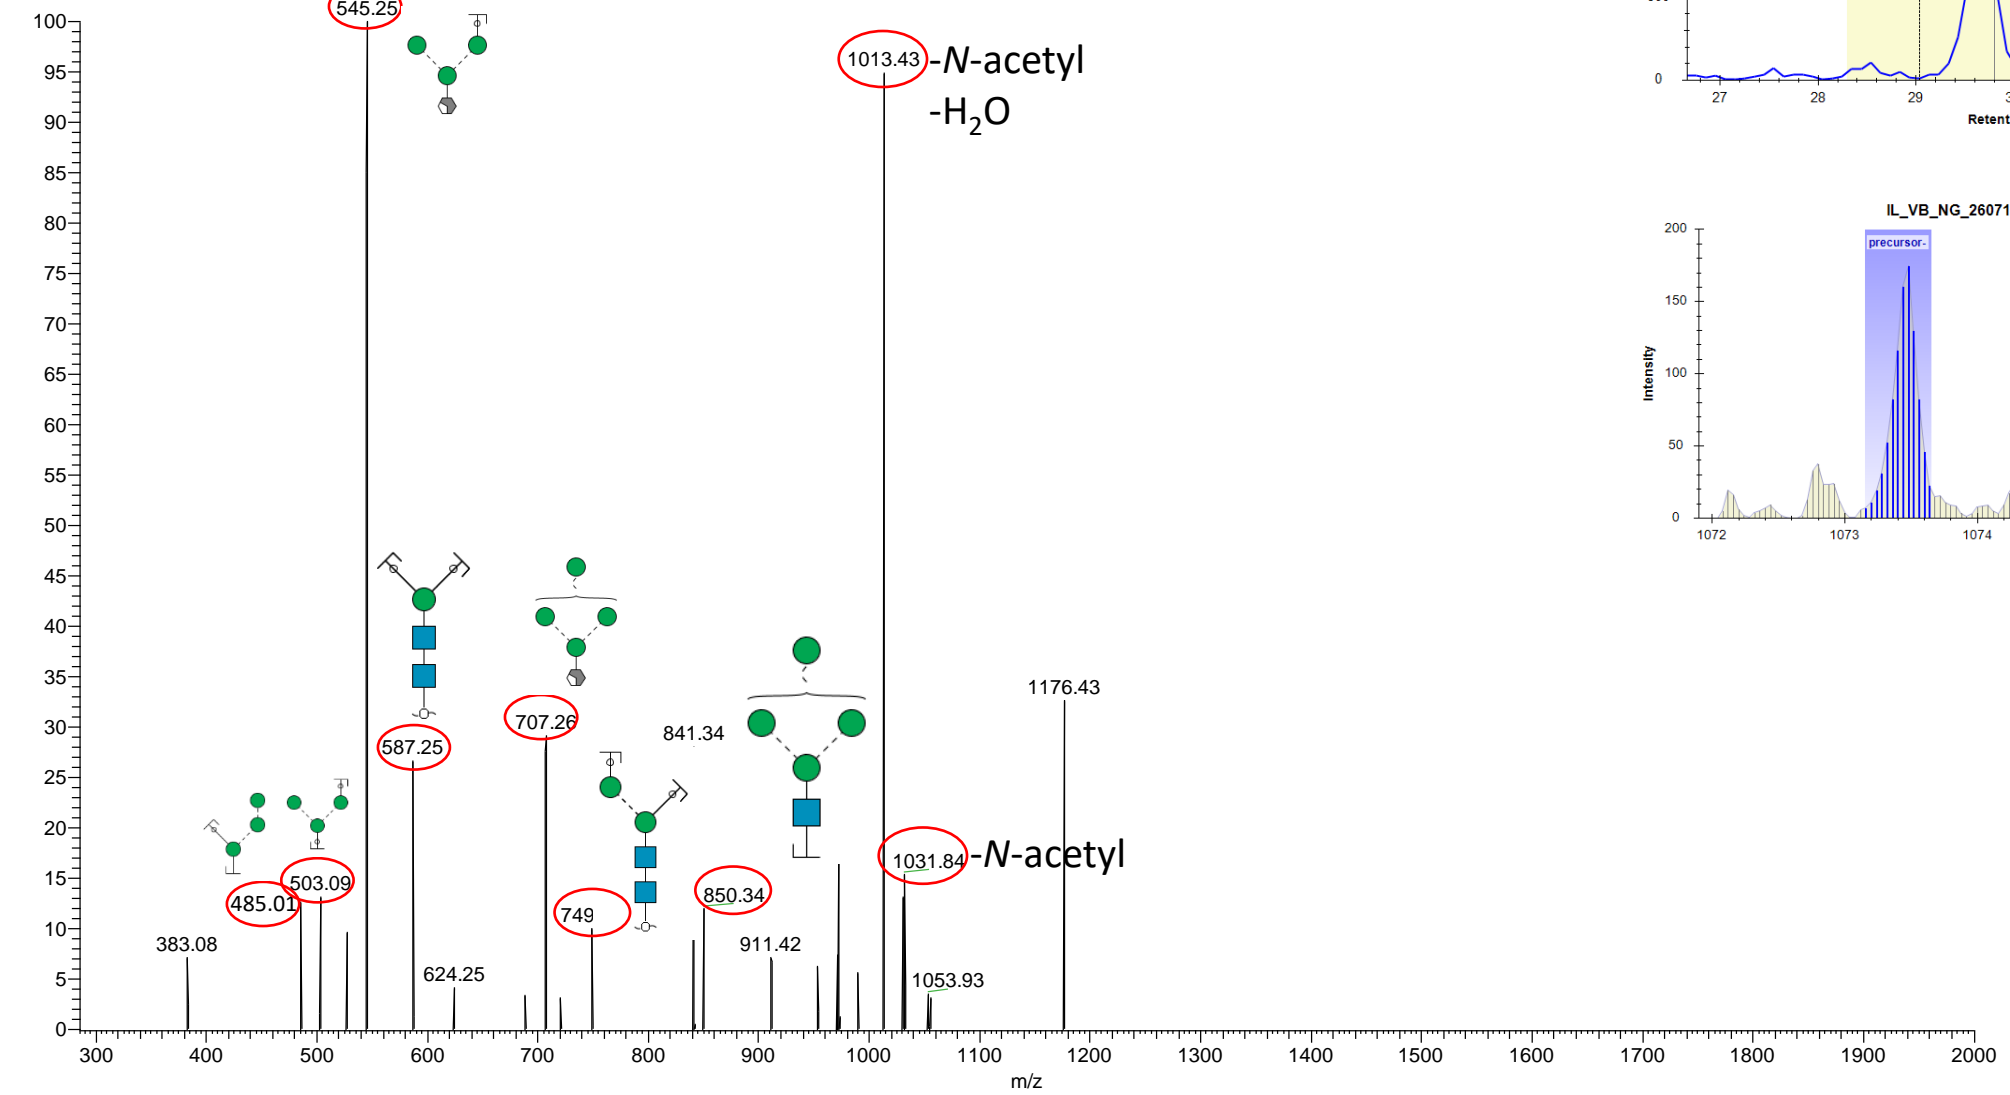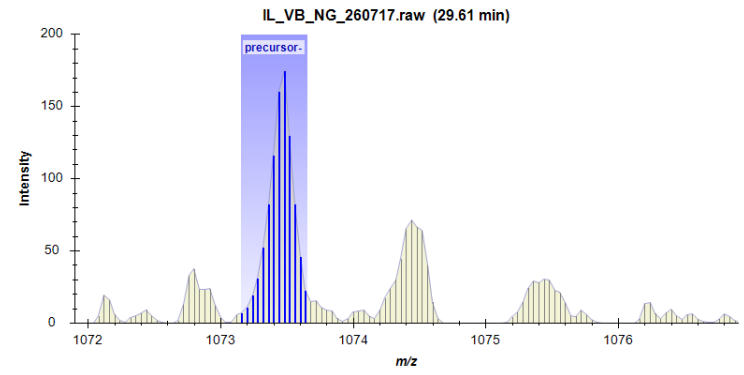

Glycan #11b  
 Oligomannose  
 Hex<sub>4</sub>HexNAc<sub>2</sub> (Man4)  
*m/z*: 1073.4 (1-)

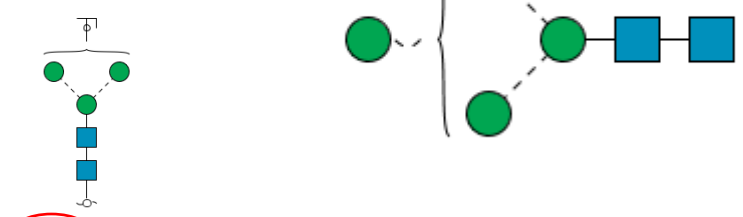

IL\_VB\_NG\_260717 #3209 RT: 32.00 AV: 1 NL: 1.64E1  
 F: ITMS - p ESI d Full ms2 1073.47@cid35.00 [285.00-2000.00]

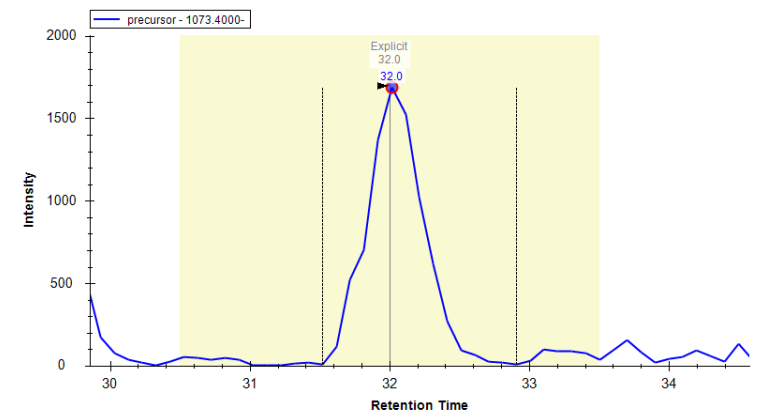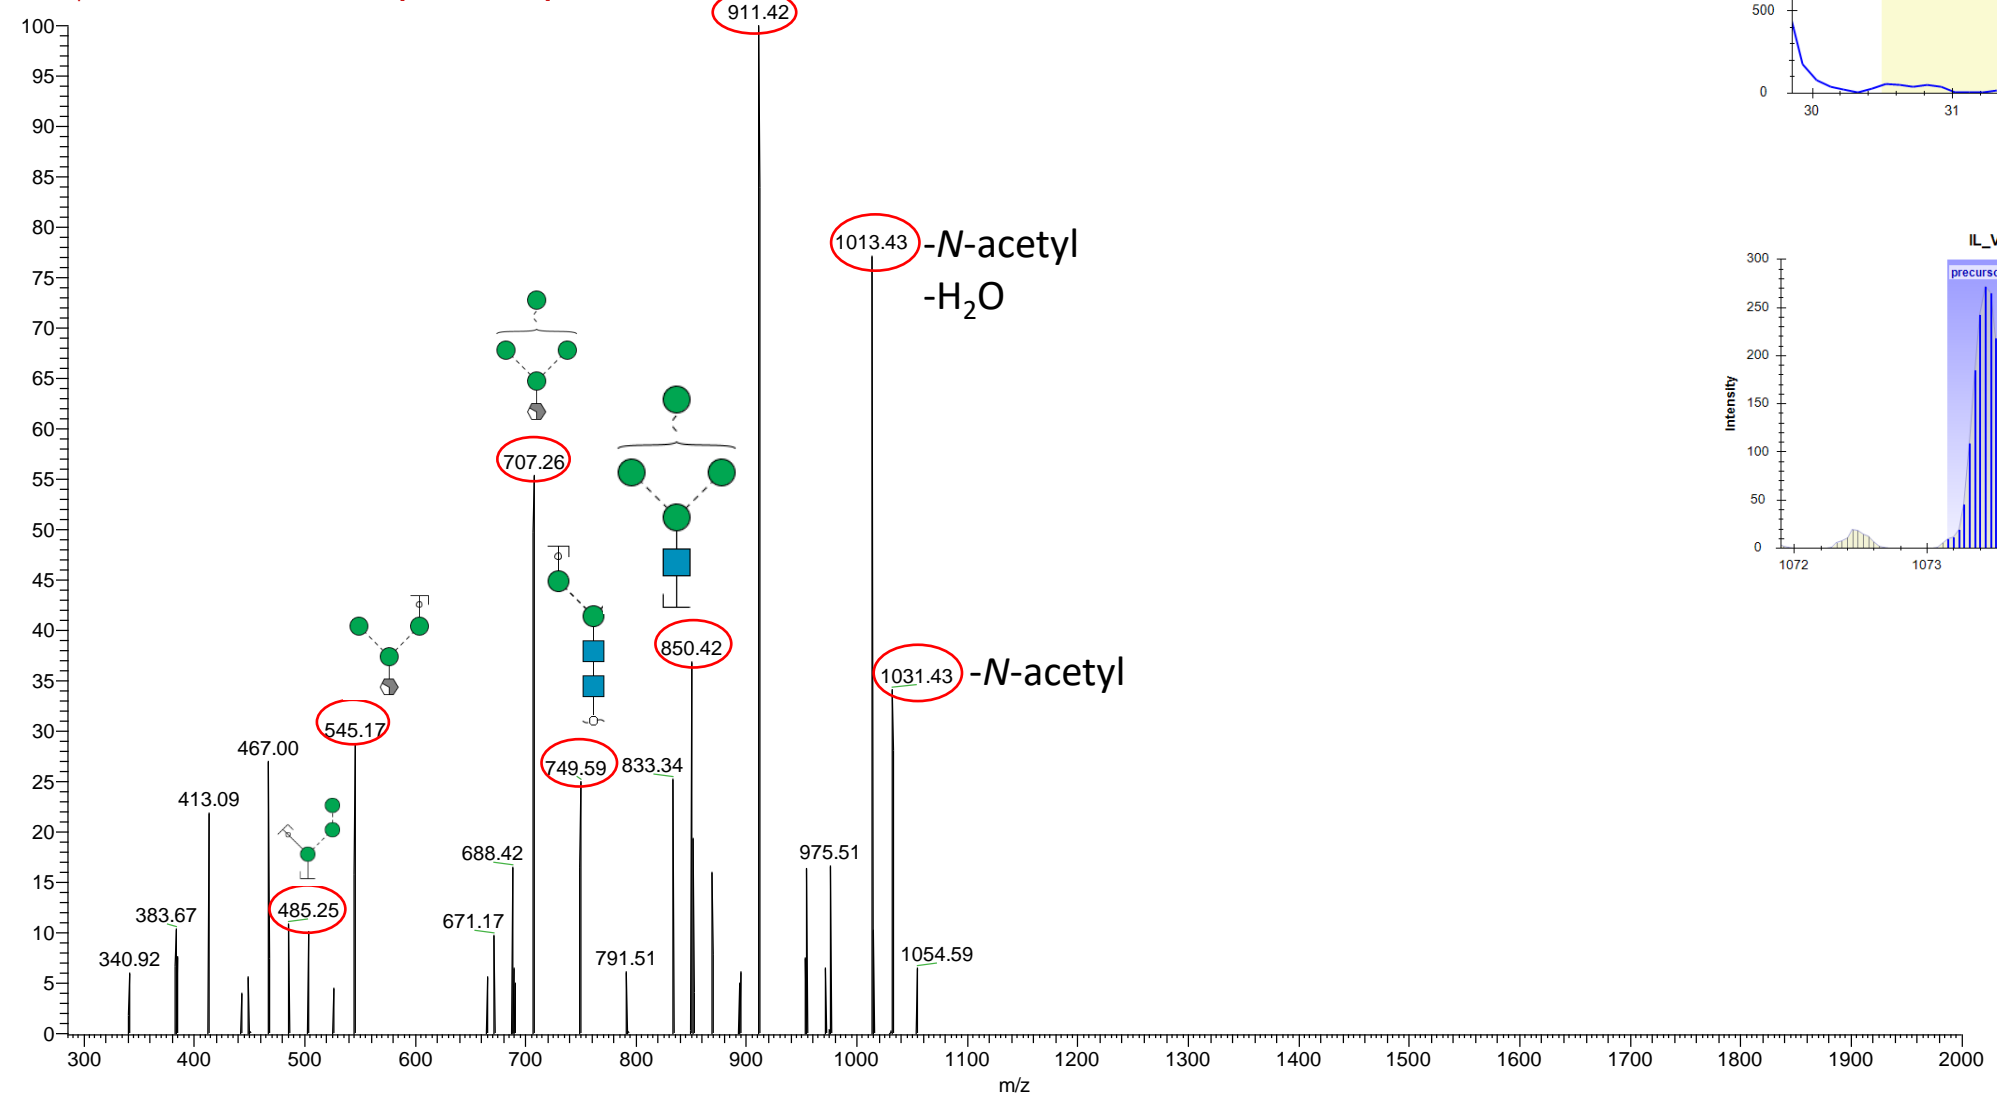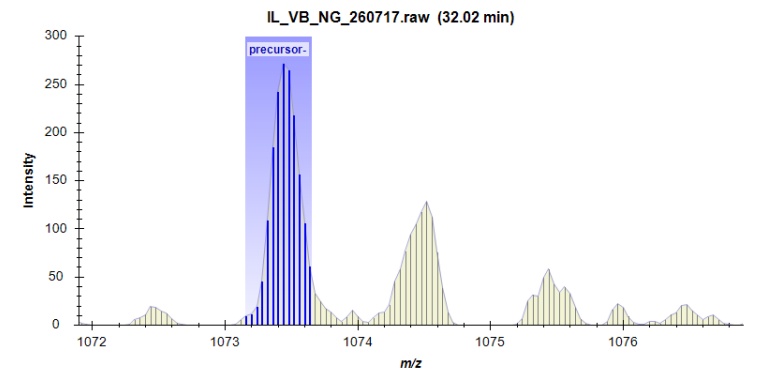

Glycan #12a  
 Oligomannose  
 Hex<sub>5</sub>HexNAc<sub>2</sub> (Man5)  
*m/z*: 1235.5<sup>(1-)</sup>

il\_vb\_ng\_260717 #2502 RT: 24.94 AV: 1 NL: 4.52E1  
 F: ITMS - p ESI d Full ms2 1235.49@cid35.00 [330.00-2000.00]

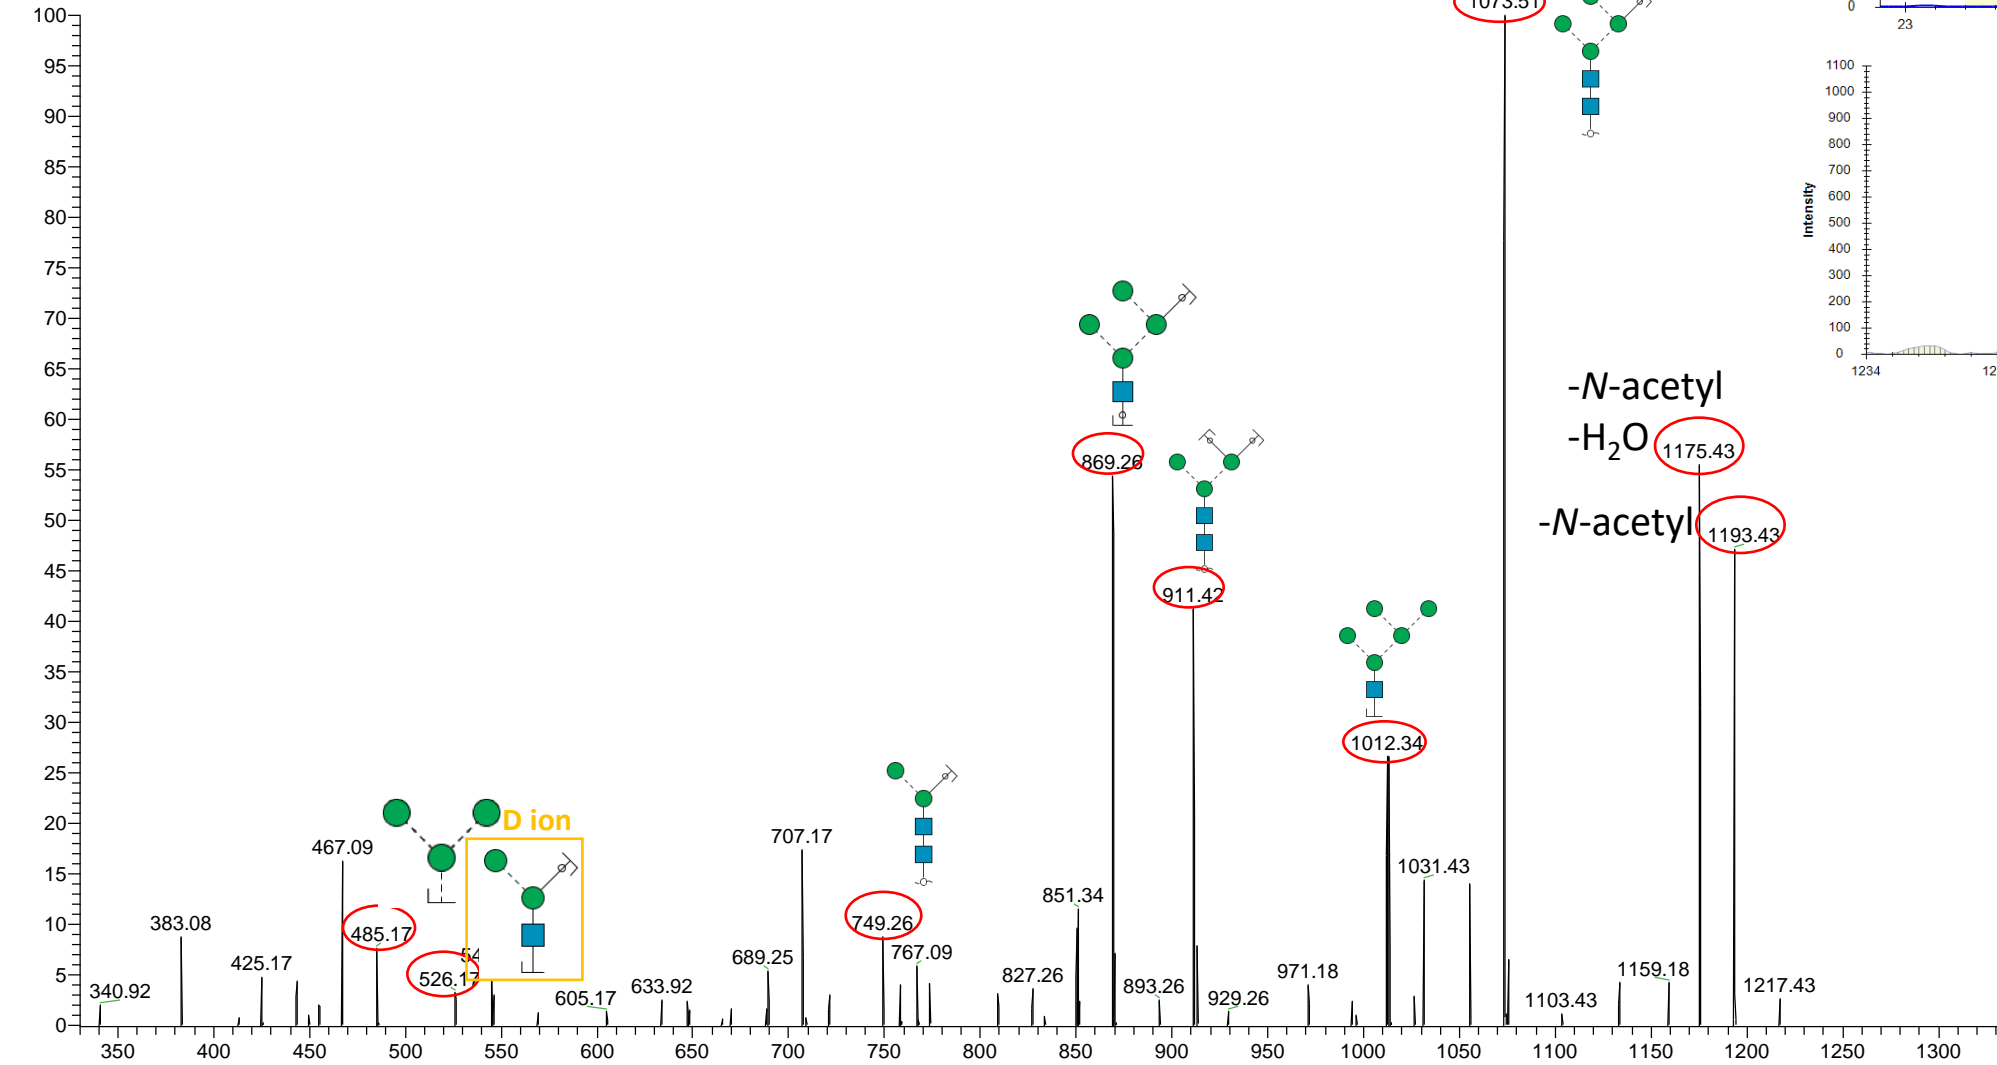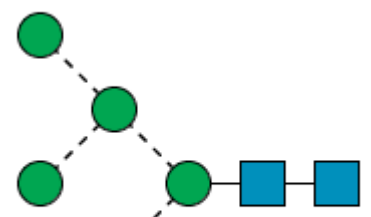

1073.51

869.26

911.42

1012.34

-N-acetyl

-H<sub>2</sub>O

1175.43

-N-acetyl

1193.43

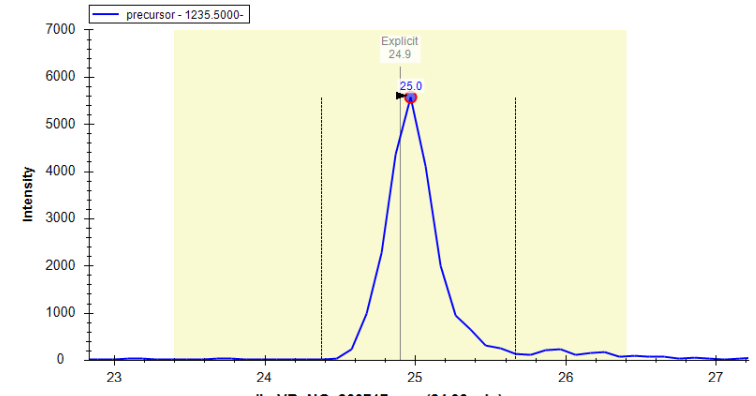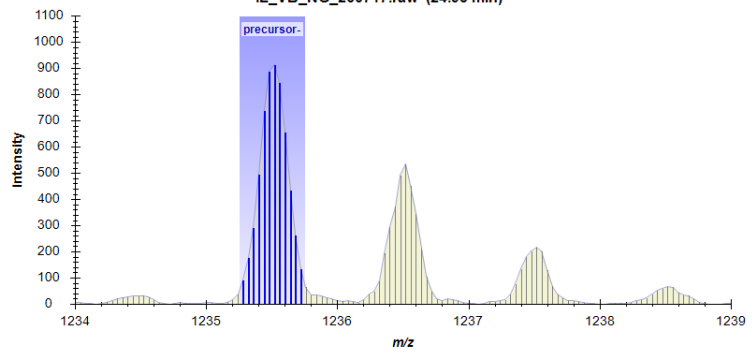

Glycan #12b  
 Oligomannose  
 Hex<sub>5</sub>HexNAc<sub>2</sub> (Man5)  
 m/z: 1235.5<sup>(1-)</sup>

il\_vb\_ng\_260717 #3869 RT: 38.76 AV: 1 NL: 1.77E1  
 F: ITMS - p ESI d Full ms2 1235.49@cid35.00 [330.00-2000.00]

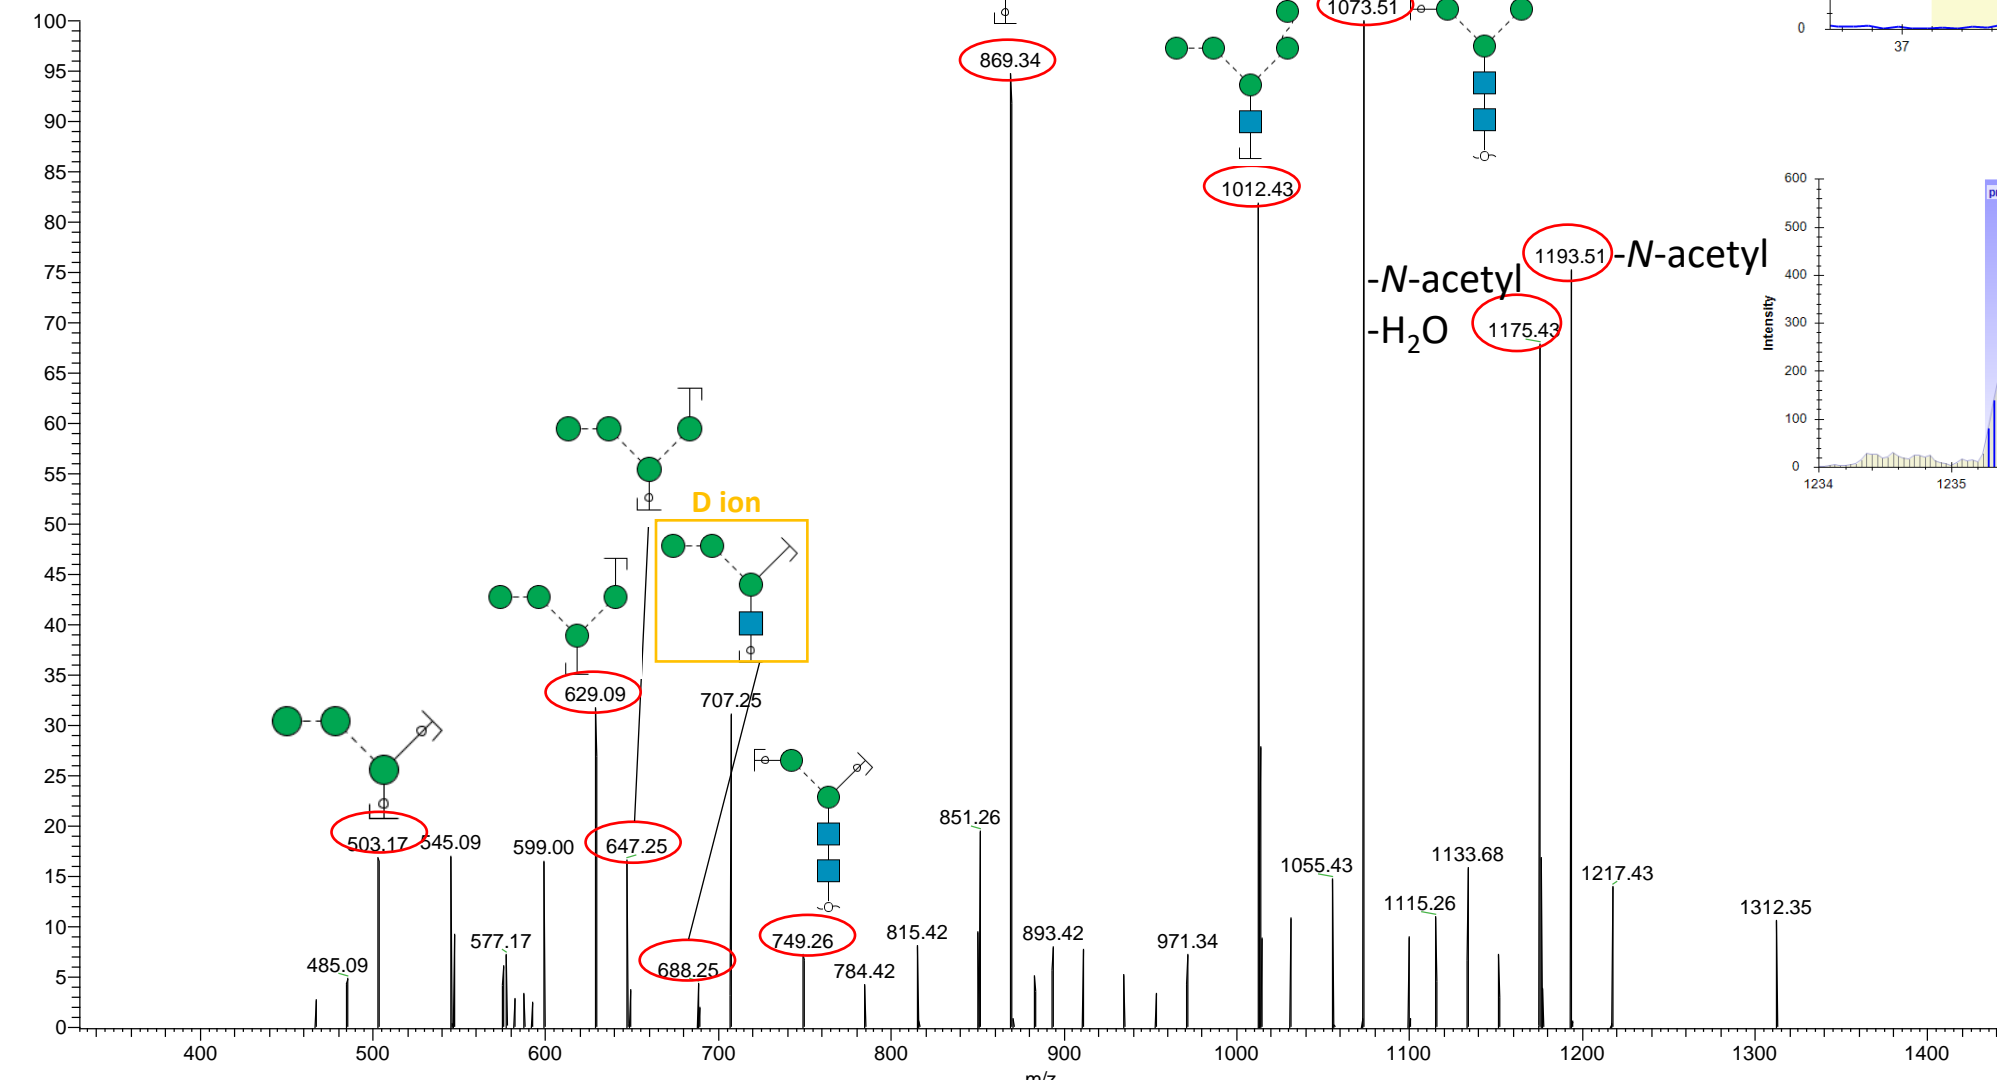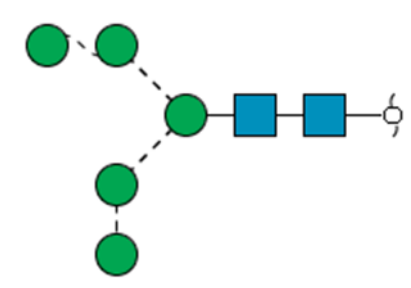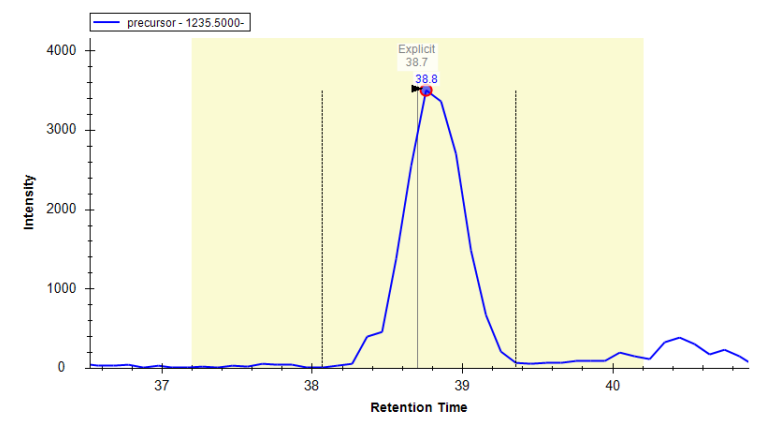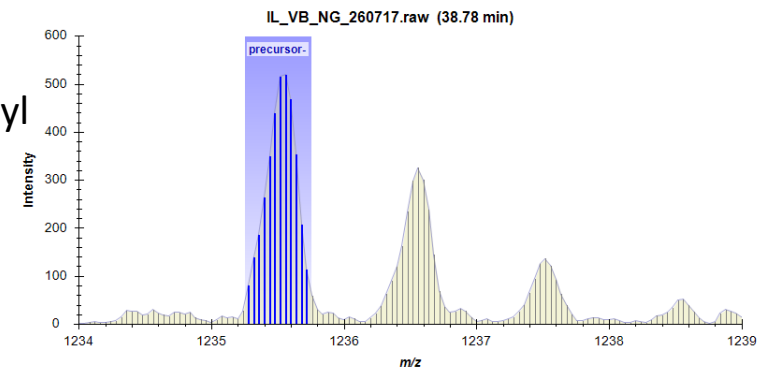

Glycan #13  
 Oligomannose  
 Hex<sub>6</sub>HexNAc<sub>2</sub> (Man6)  
*m/z*: 698.3<sup>(2-)</sup>

il\_vb\_ng\_260717 #3232 RT: 32.23 AV: 1 NL: 4.62E2  
 F: ITMS - p ESI d Full ms2 698.27@cid35.00 [180.00-1410.00]

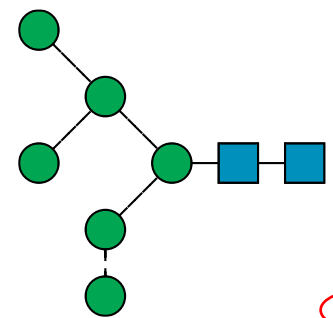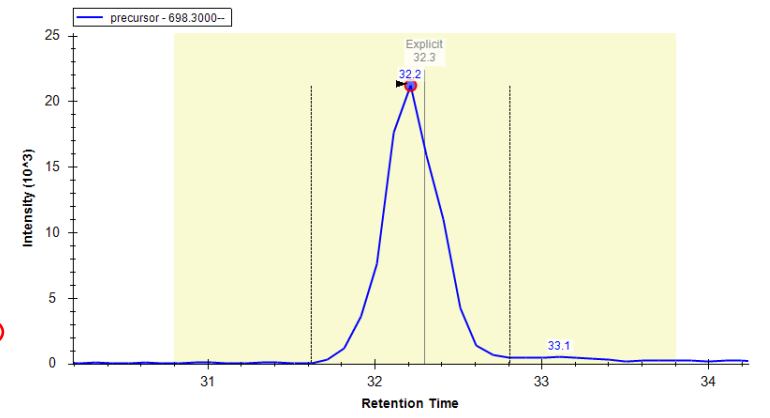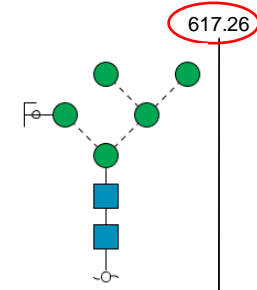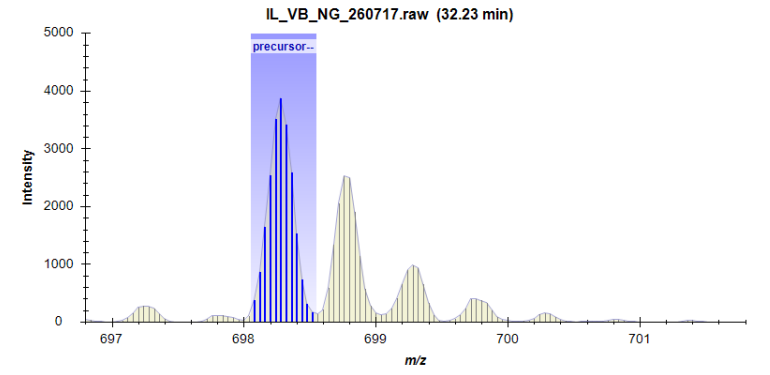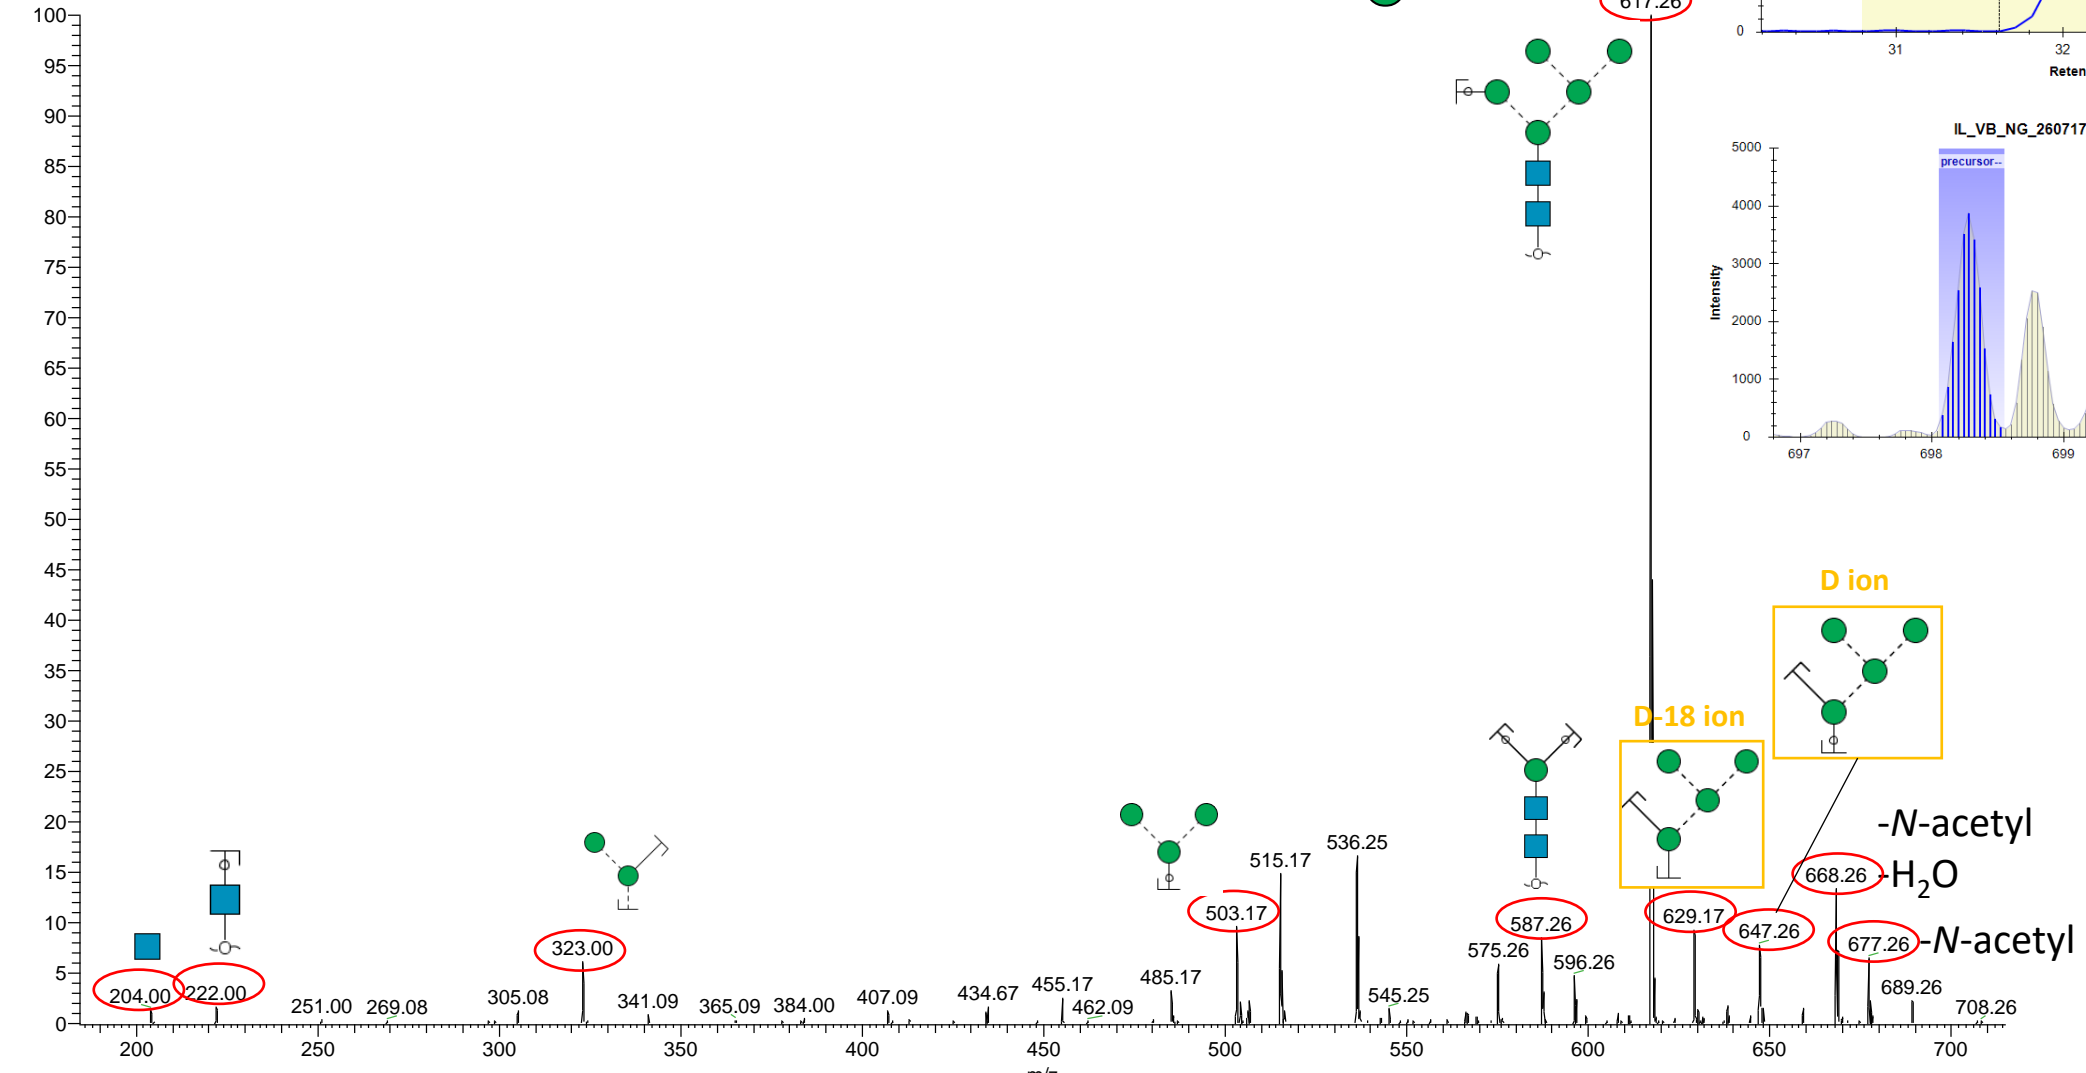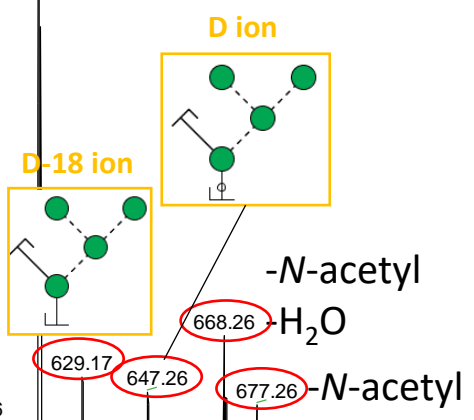

Glycan #14  
 Oligomannose  
 Hex<sub>7</sub>HexNAc<sub>2</sub> (Man7)  
*m/z*: 779.3<sup>(2-)</sup>

il\_vb\_ng\_260717 #3312 RT: 33.05 AV: 1 NL: 2.01E2  
 F: ITMS - p ESI d Full ms2 779.30@cid35.00 [200.00-1570.00]

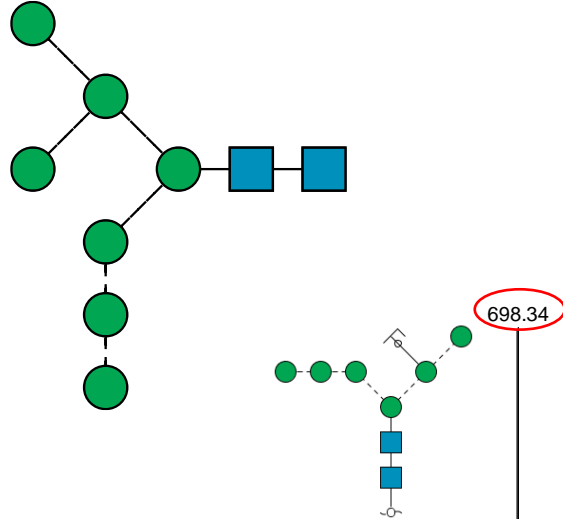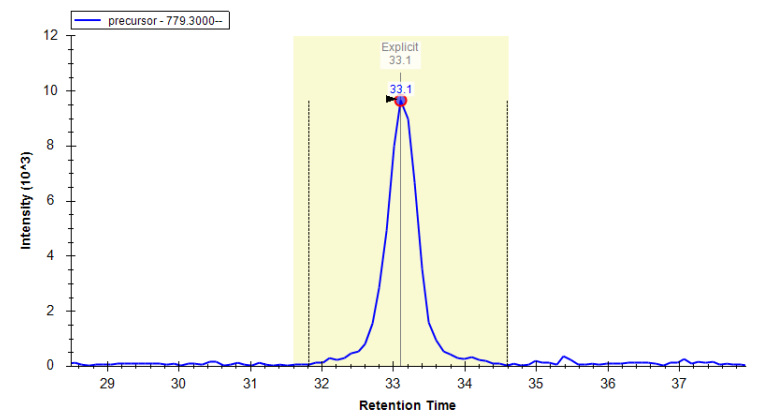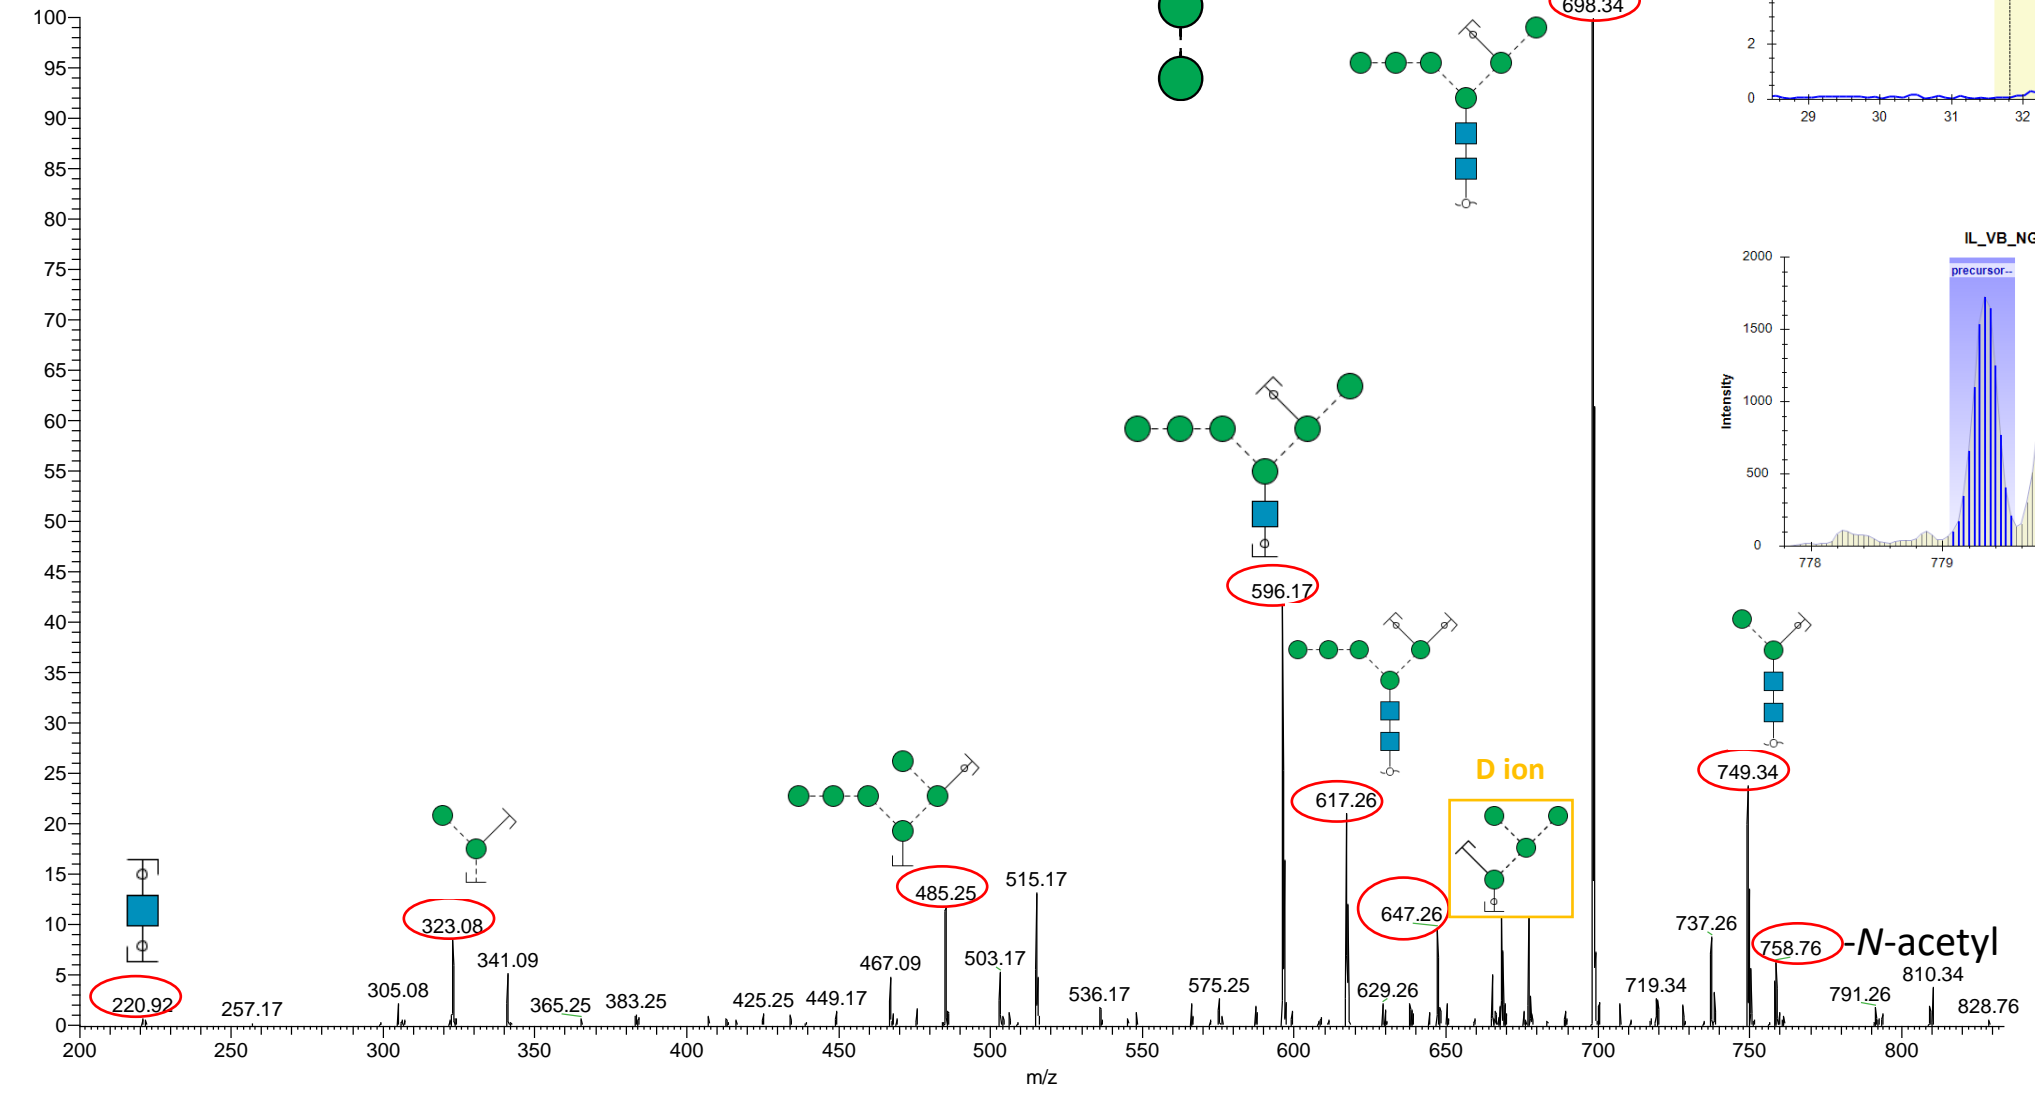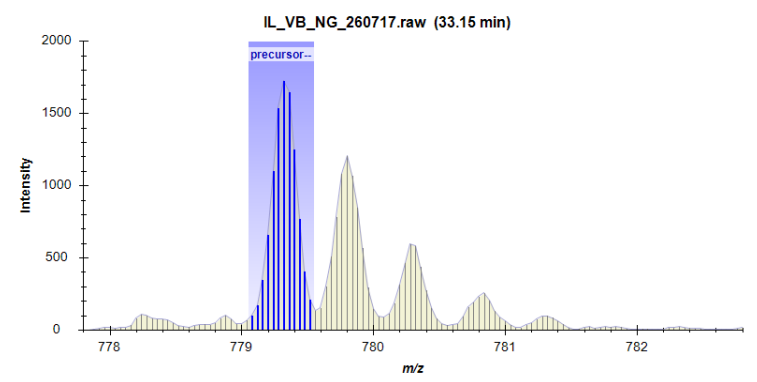

D ion

-N-acetyl

Glycan #15  
 Oligomannose  
 Hex<sub>8</sub>HexNAc<sub>2</sub> (Man8)  
 m/z: 860.3<sup>(2-)</sup>

il\_vb\_ng\_260717 #3372 RT: 33.66 AV: 1 NL: 8.68E1  
 F: ITMS -p ESI d Full ms2 860.32@cid35.00 [225.00-1735.00]

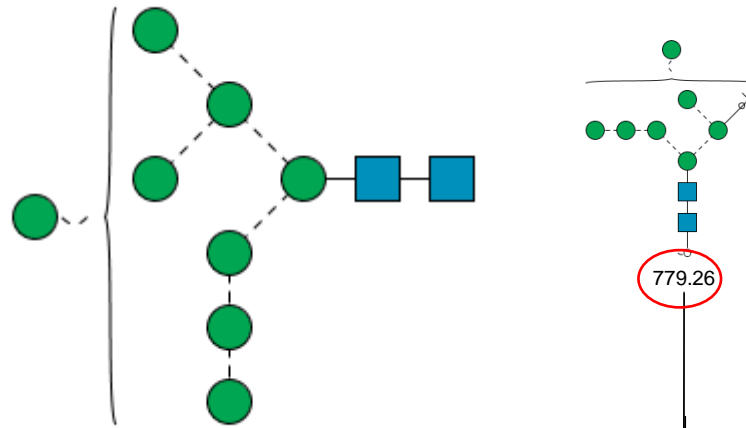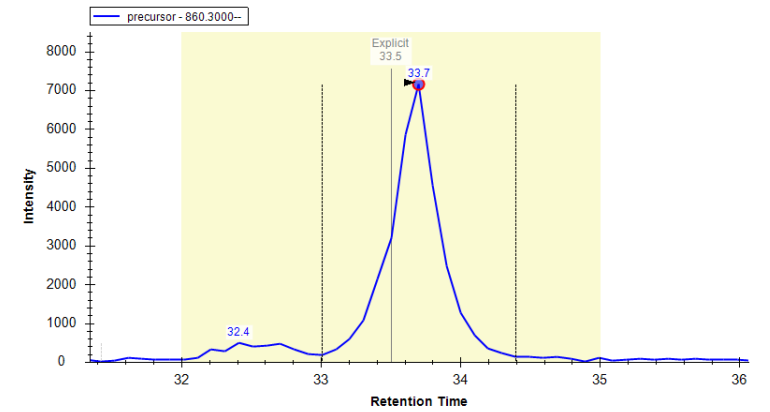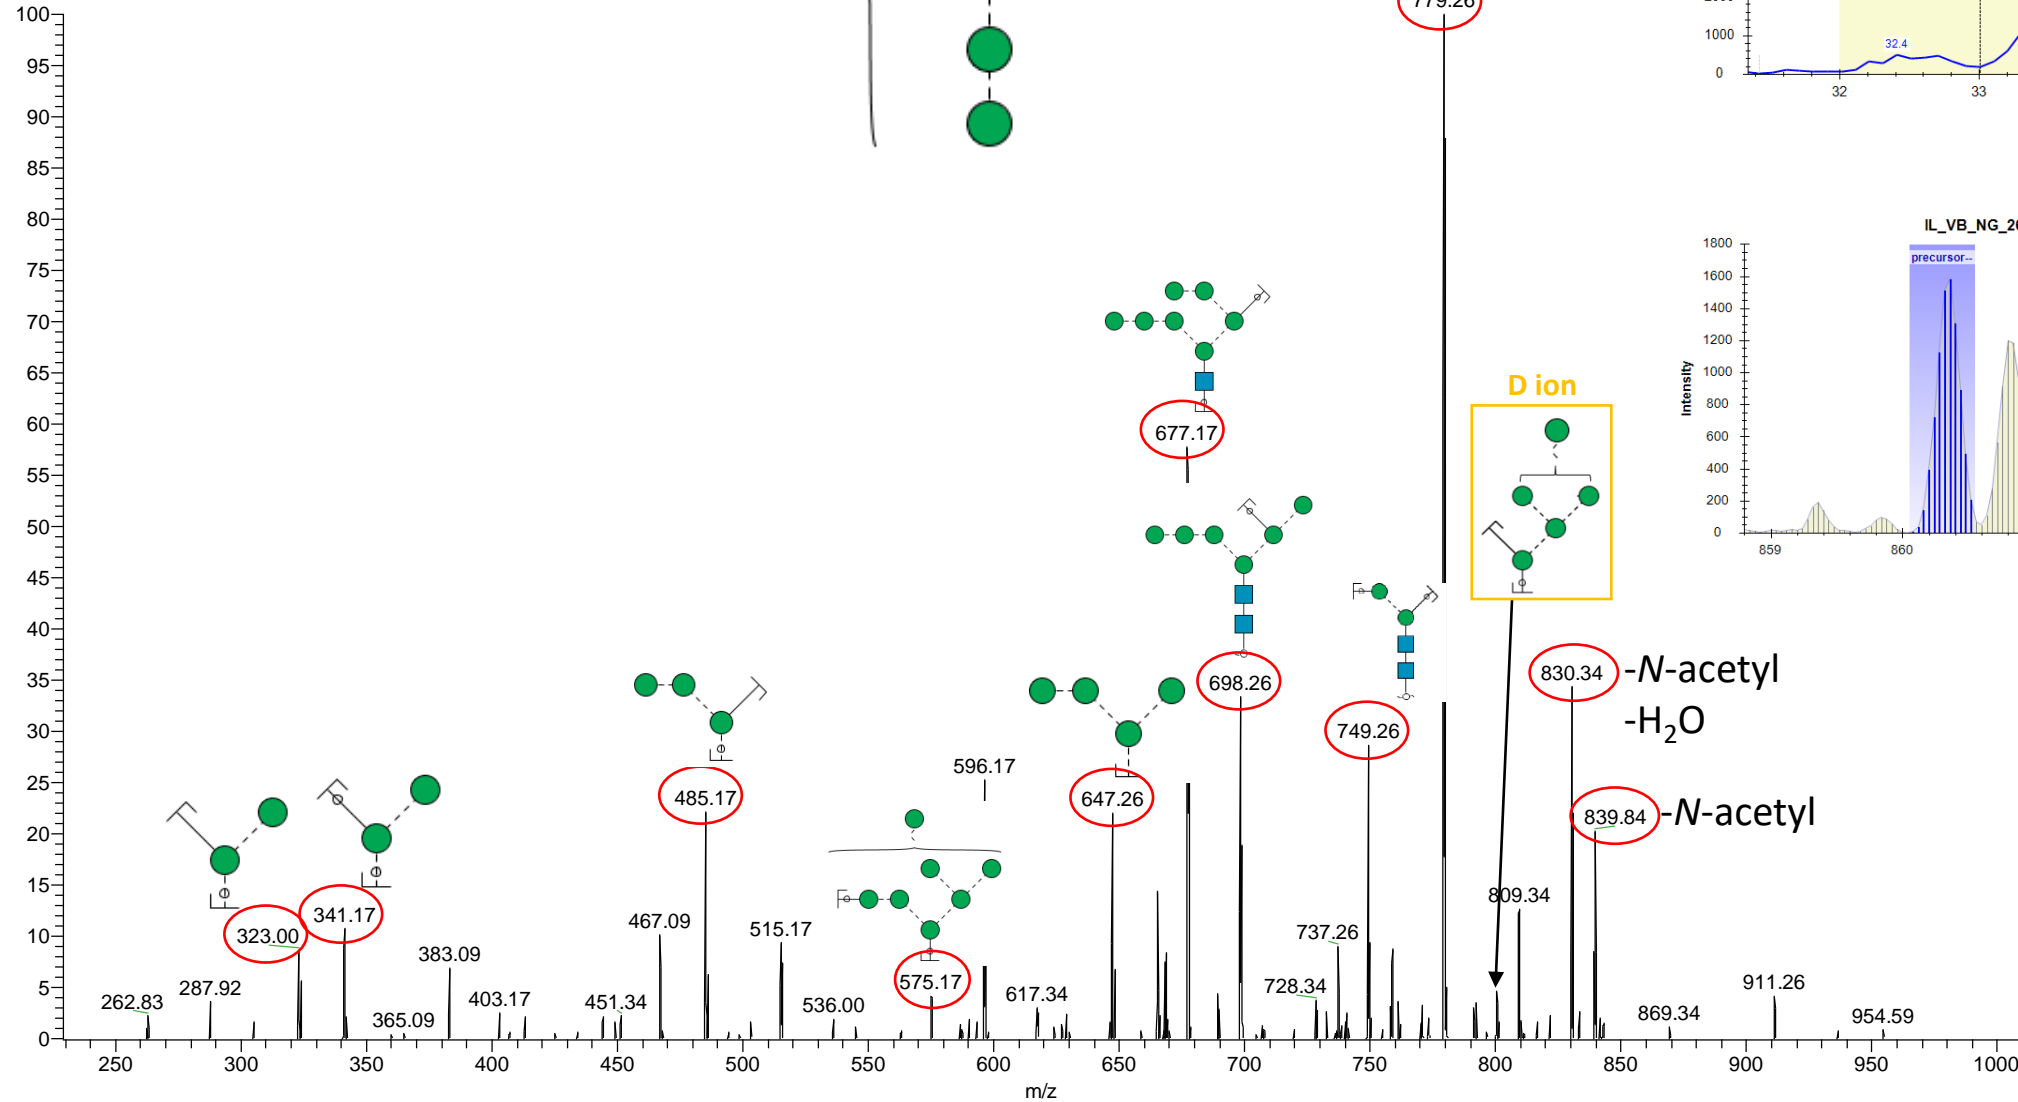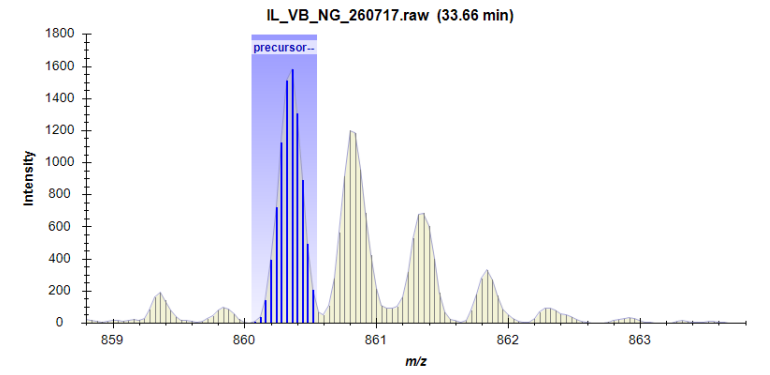



Glycan #16  
 Oligomannose  
 Hex<sub>9</sub>HexNAc<sub>2</sub> (Man9)  
 m/z: 941.4 (2-)

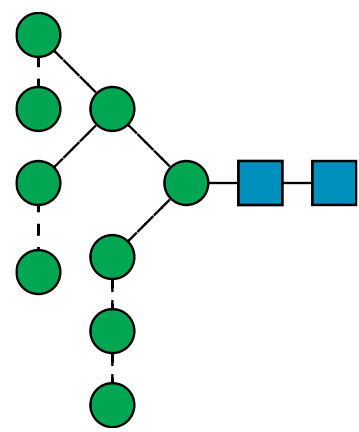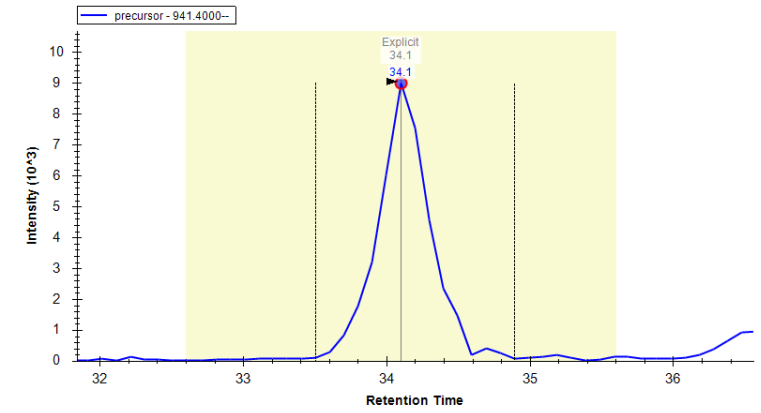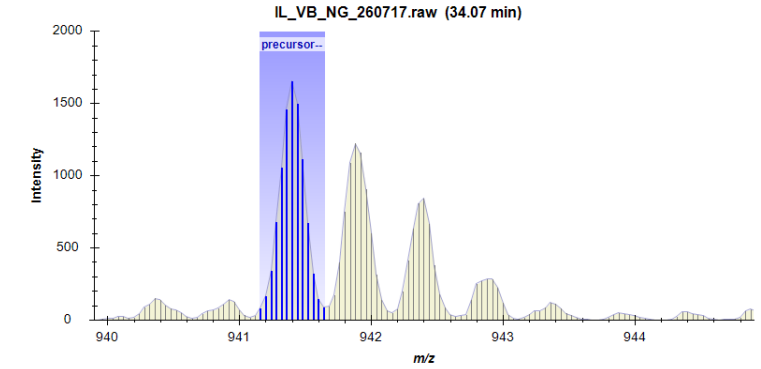

IL\_VB\_NG\_260717 #3422 RT: 34.18 AV: 1 NL: 8.49E1  
 F: ITMS - p ESI d Full ms2 941.34@cid35.00 [245.00-1895.00]

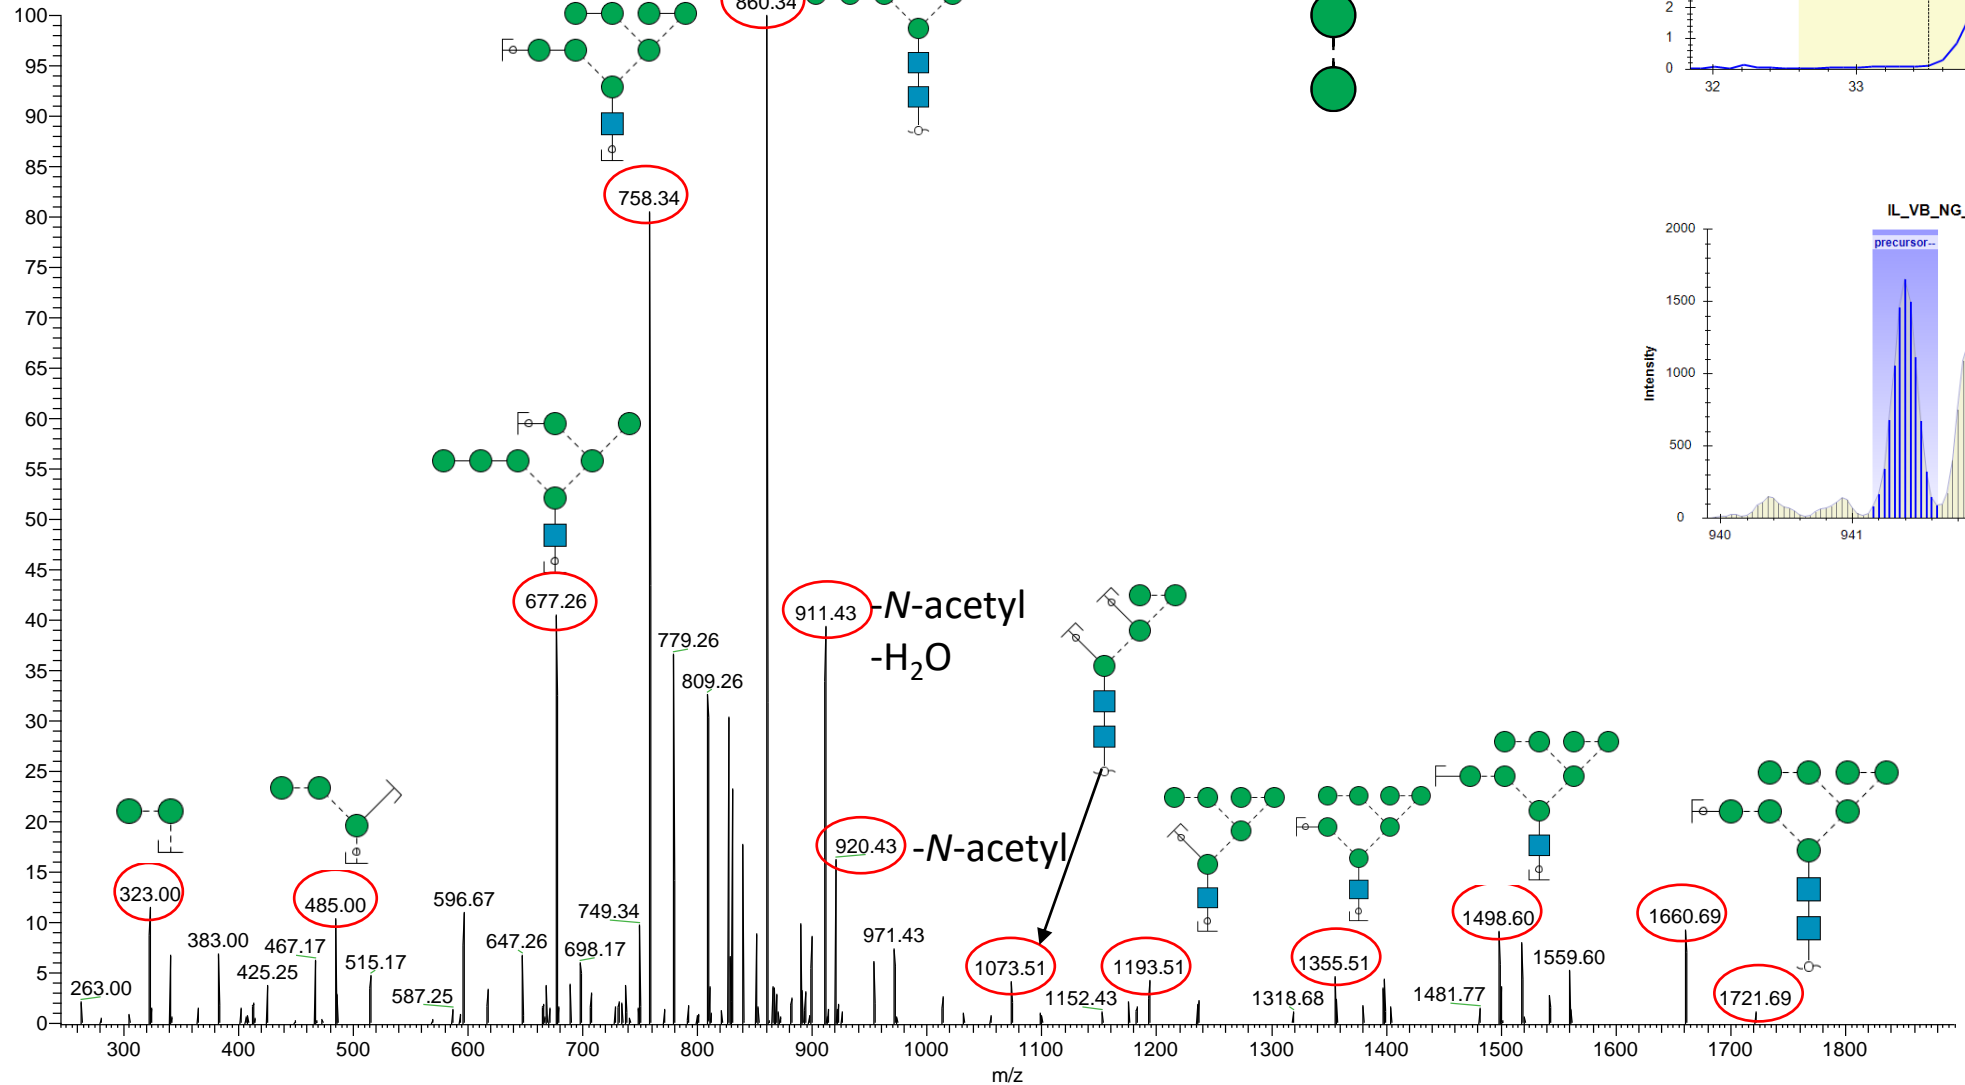

# Glycan #17

## Oligomannose

### Hex<sub>6</sub>HexNAc<sub>2</sub>Phos<sub>1</sub> (M6P1)

*m/z*: 738.3<sup>(2-)</sup>

IL\_VB\_NG\_260717#1797 RT: 17.91 AV: 1 NL: 1.59E1  
 F: ITMS - p ESI d Full ms2 738.22@cid35.00 [190.00-1490.00]

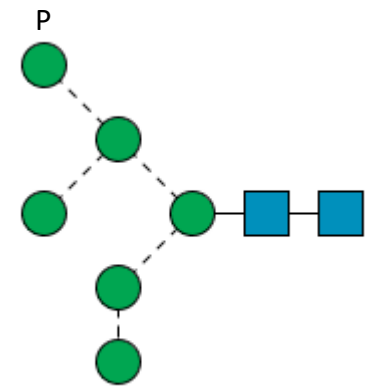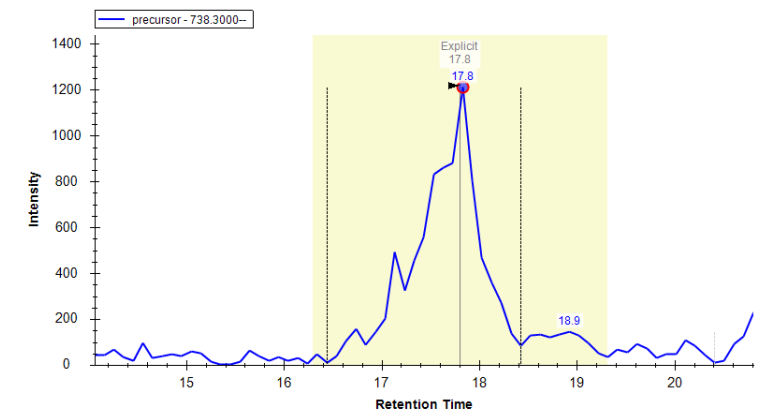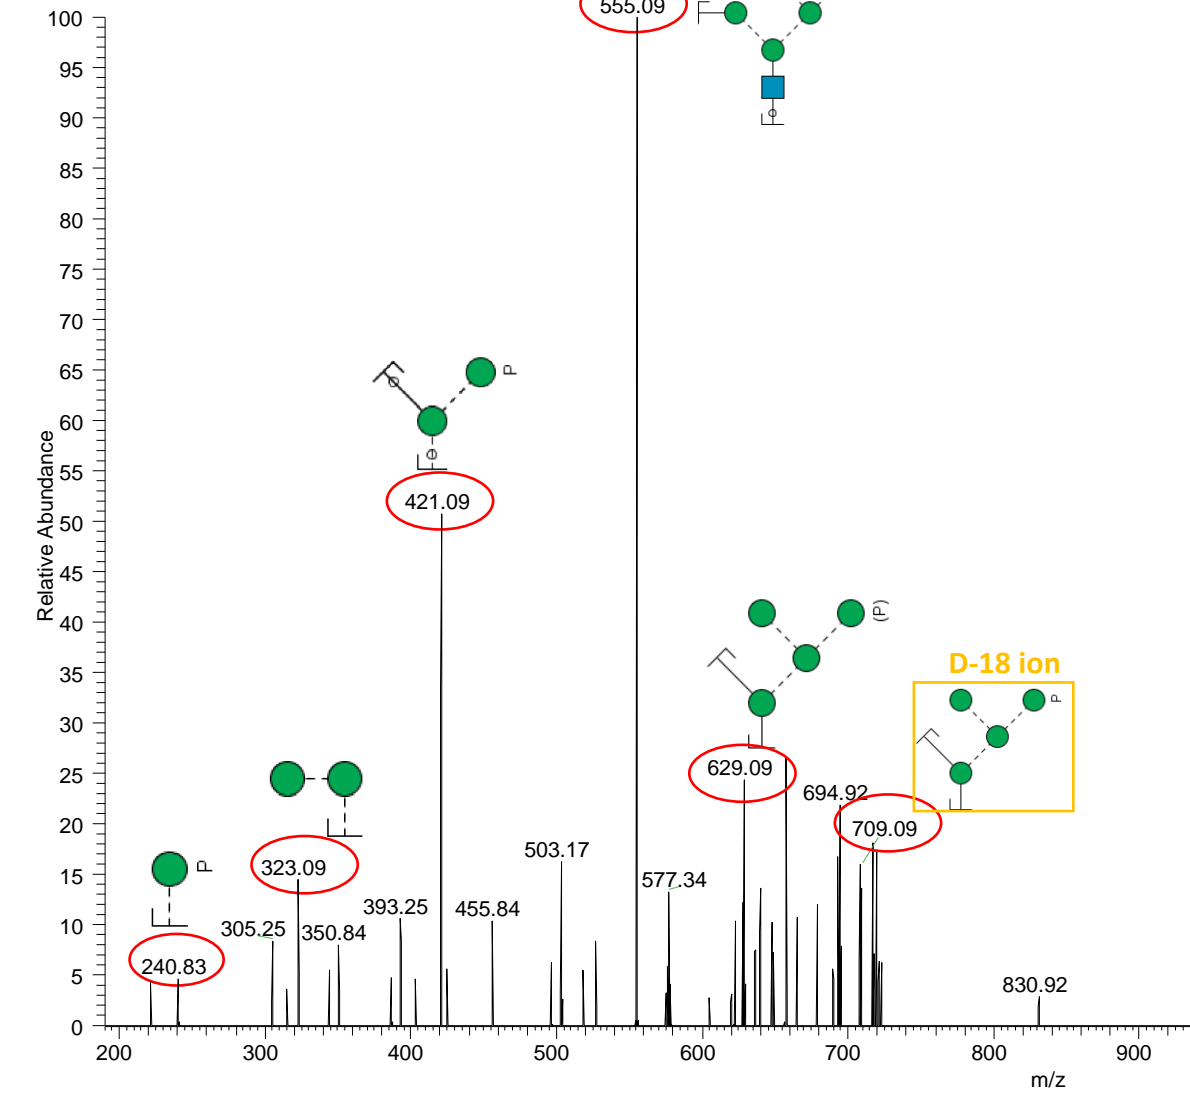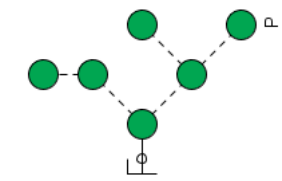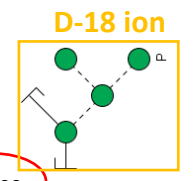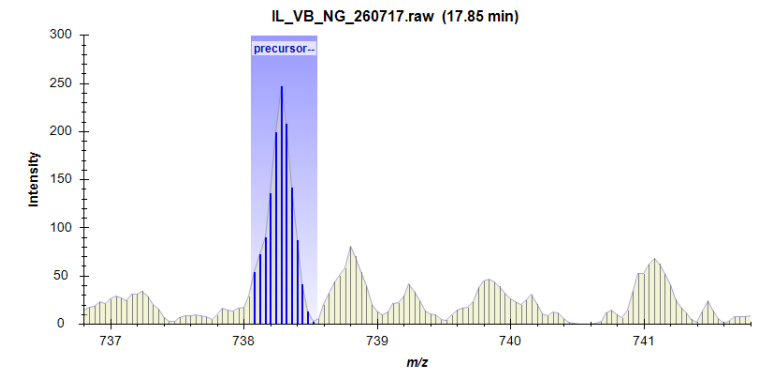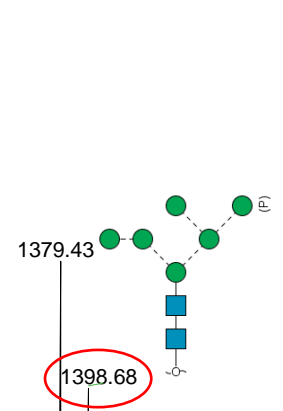

Glycan #18  
 Oligomannose  
 Hex<sub>7</sub>HexNAc<sub>2</sub>Phos<sub>1</sub> (M7P1)  
 m/z: 819.3<sup>(2-)</sup>

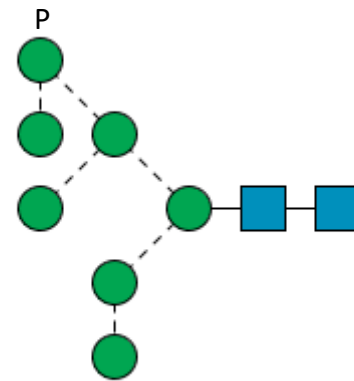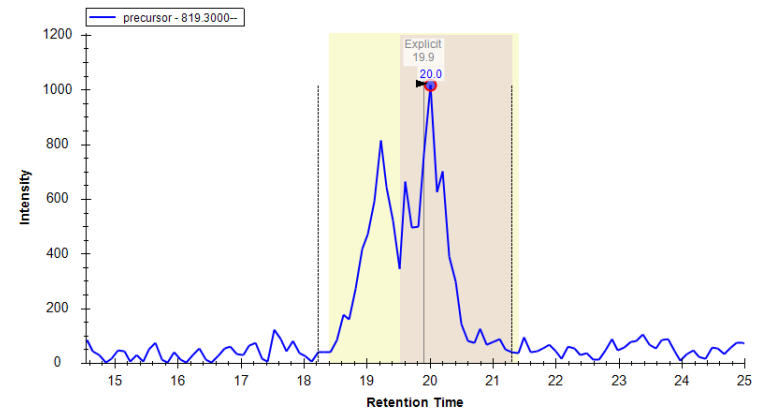

IL\_XB\_NG\_260717 #1995 RT: 19.90 AV: 1 NL: 5.55E1  
 F: ITMS - p ESI d Full ms2 819.27@cid35.00 [215.00-11

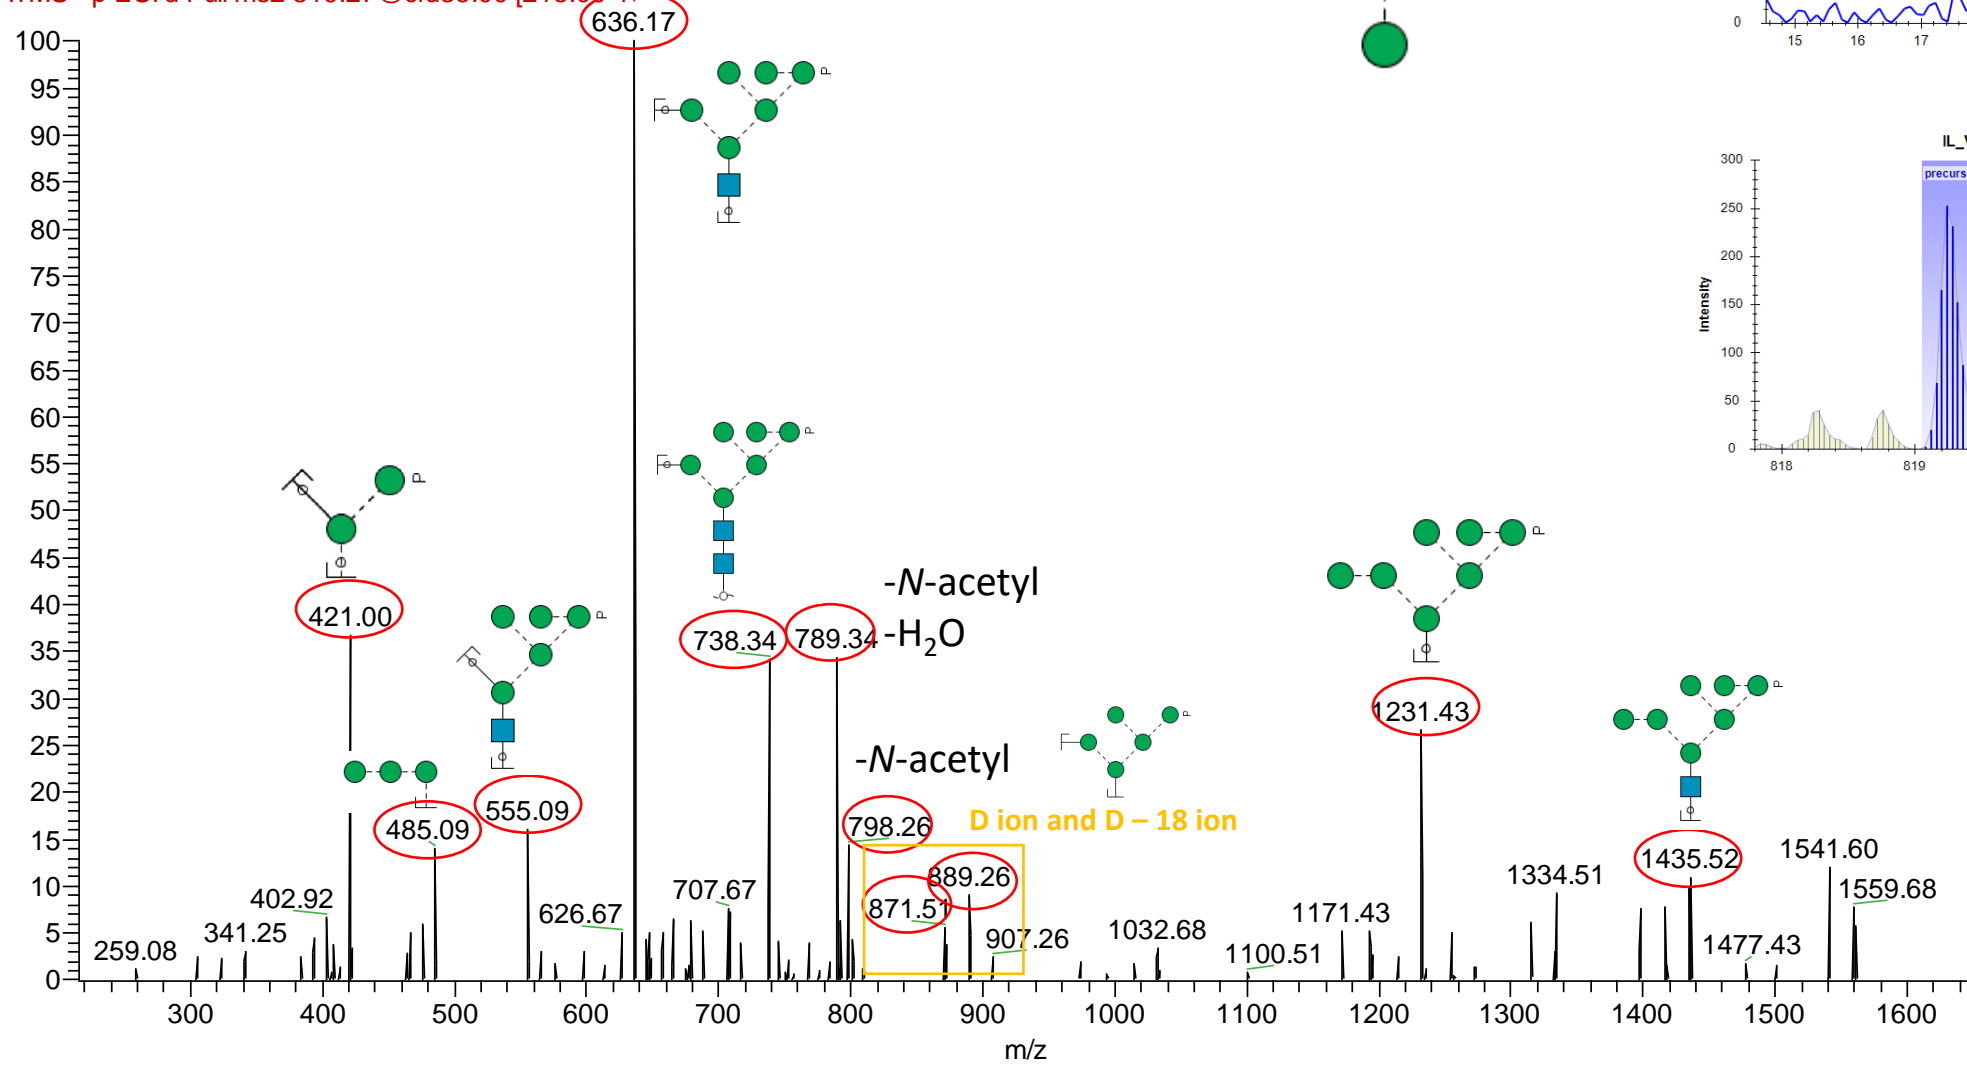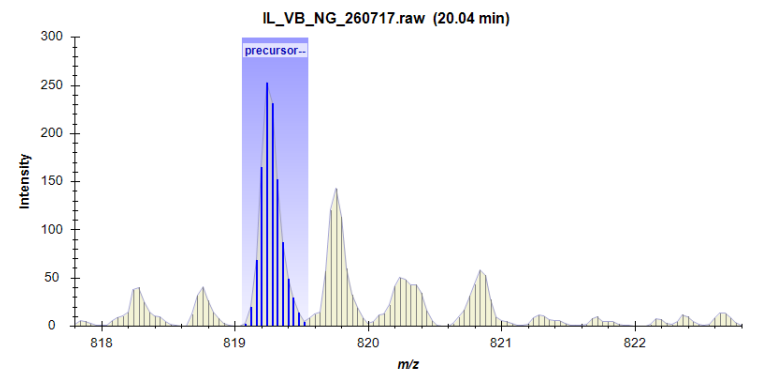

# Glycan #19

## Complex

HexNAc<sub>1</sub>+ Hex<sub>2</sub>HexNAc<sub>2</sub>Fuc<sub>1</sub>

*m/z*: 1098.5 (1-)

IL\_YA\_NG\_260717 #3848 RT: 38.43 AV: 1 NL: 2.21E1  
F: ITMS - p ESI d Full ms2 1098.47 @ 38.43 [290.00-2000.00]

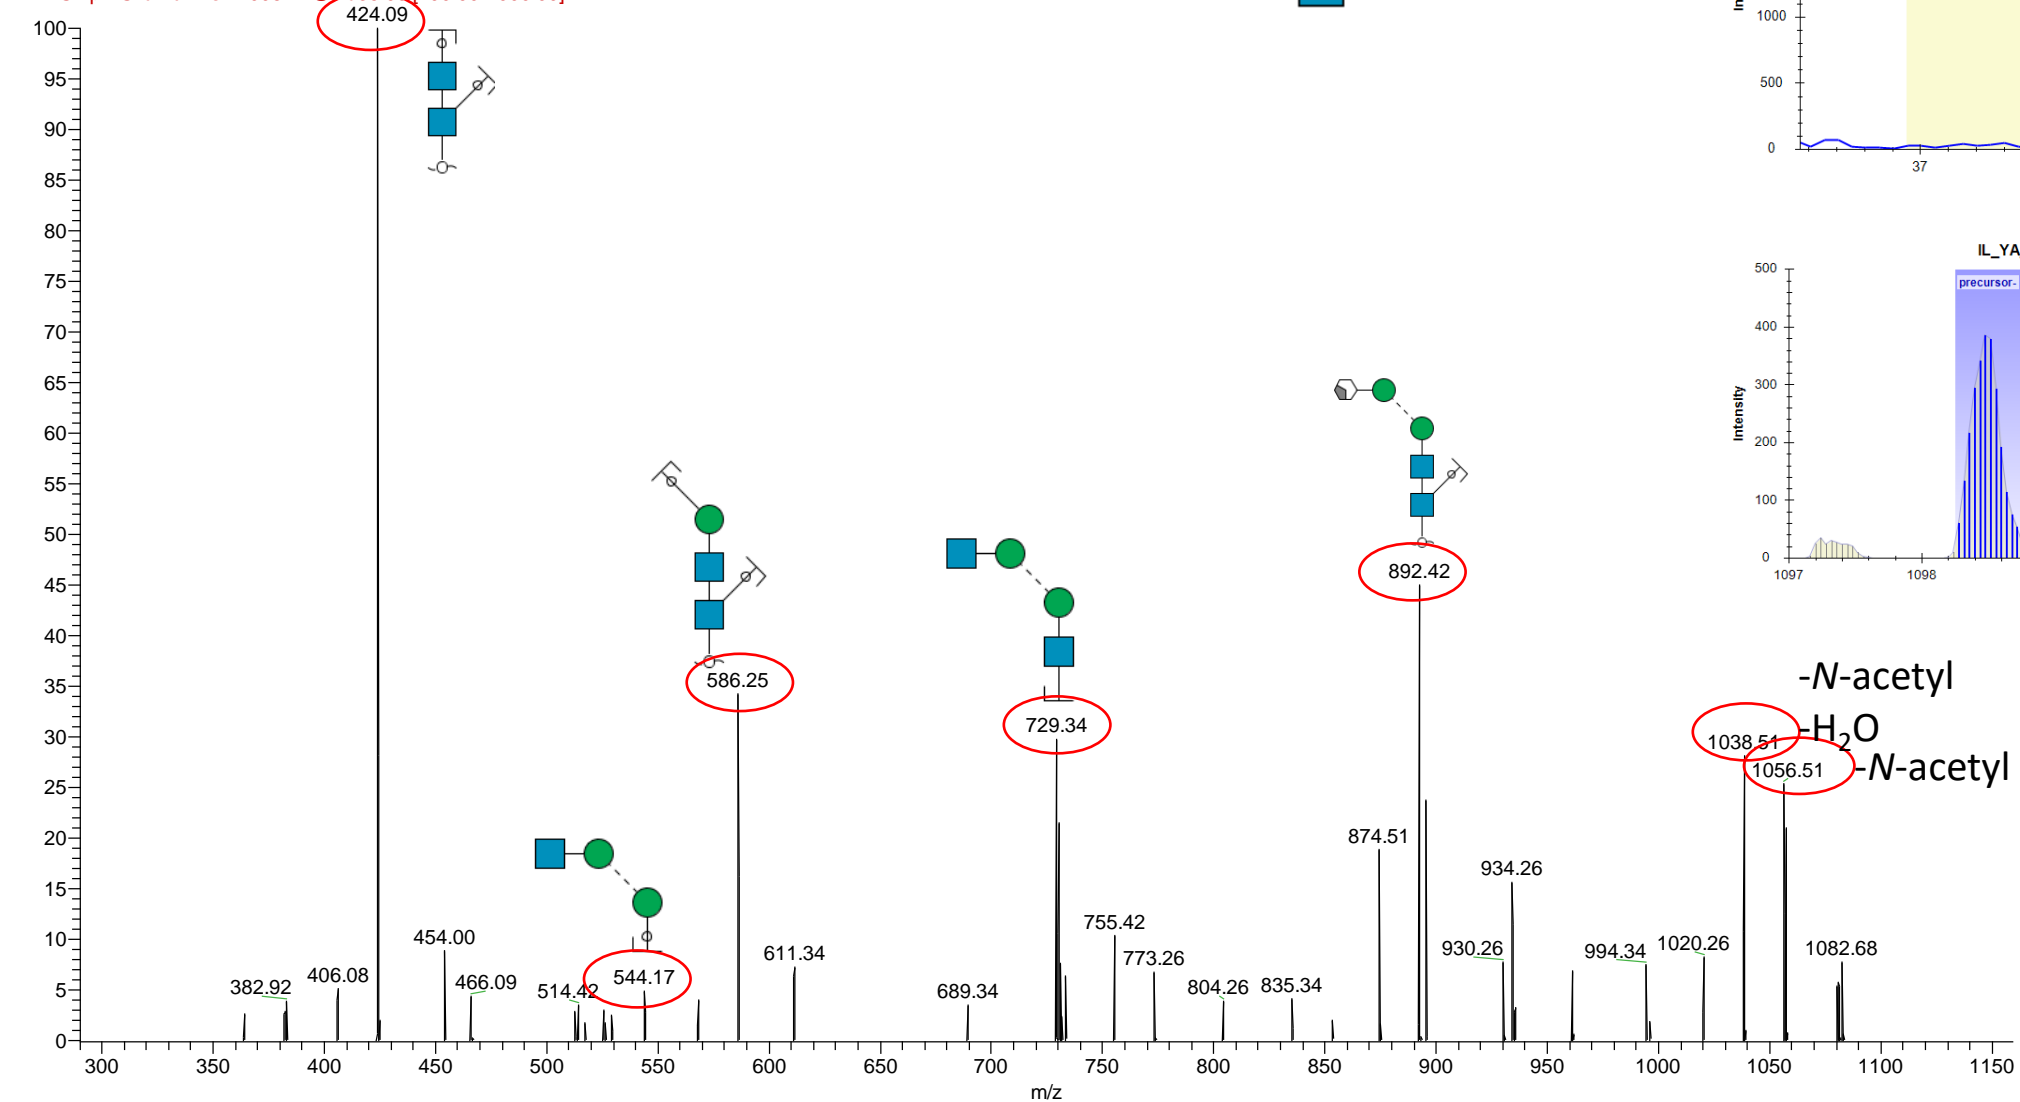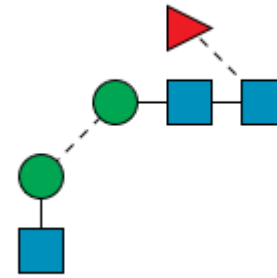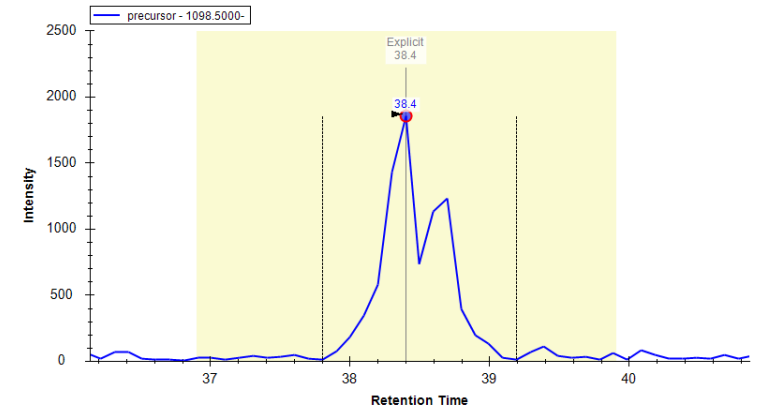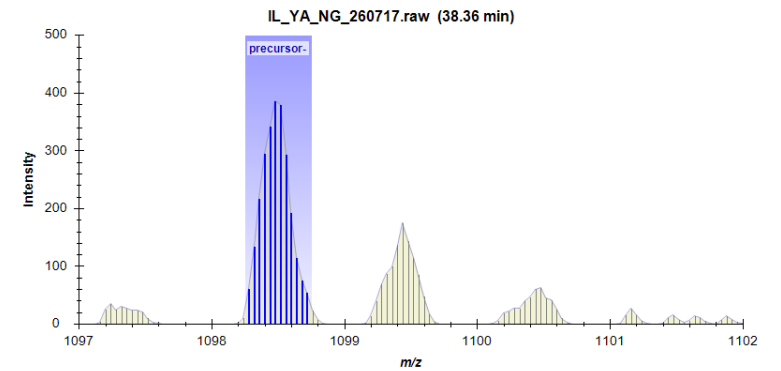

-N-acetyl  
-H<sub>2</sub>O  
-N-acetyl

Note: From biosynthetic pathway and lack of D and D-18 ions, extension is predicted at  $\alpha$ -1,3 arm.

Glycan #20a

Complex

HexNAc<sub>1</sub>Fuc<sub>1</sub>+ Hex<sub>3</sub>HexNAc<sub>2</sub>

*m/z*: 1260.5<sup>(1-)</sup>

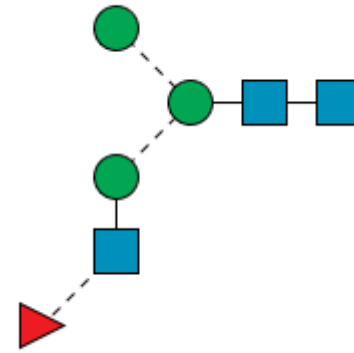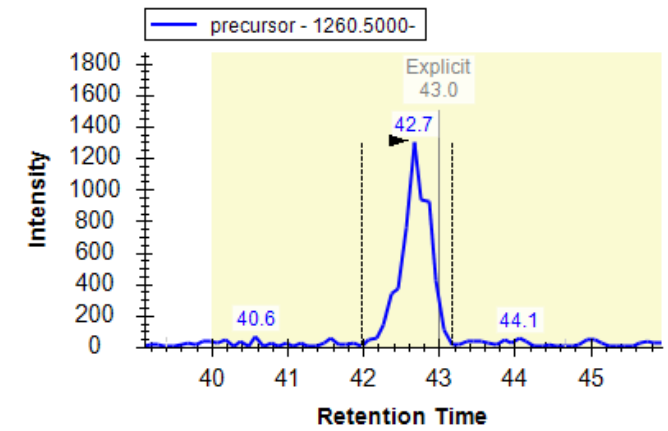

No MS/MS available in N-glycomics data

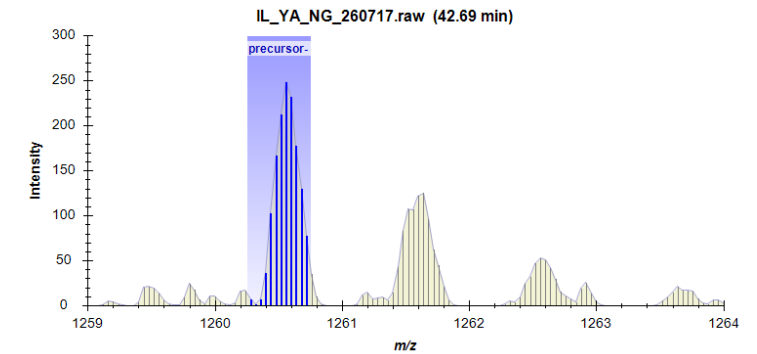

Note: There is a lack of tandem mass spectral data to evidence the glycan structure. However, based on early PGC-LC elution and the expected biosynthetic relationships between observed structures, this glycan is annotated as the antenna fucosylated isomer of glycan #20a. The exact antennary fucosyl linkage(s) (here drawn as alpha1,3) remains undetermined.

# Glycan #20b

Complex

HexNAc<sub>1</sub> + Hex<sub>3</sub>HexNAc<sub>2</sub>Fuc<sub>1</sub>

*m/z*: 1260.5 (1-)

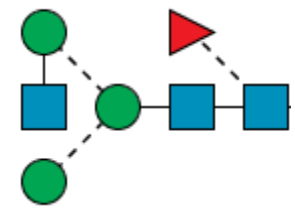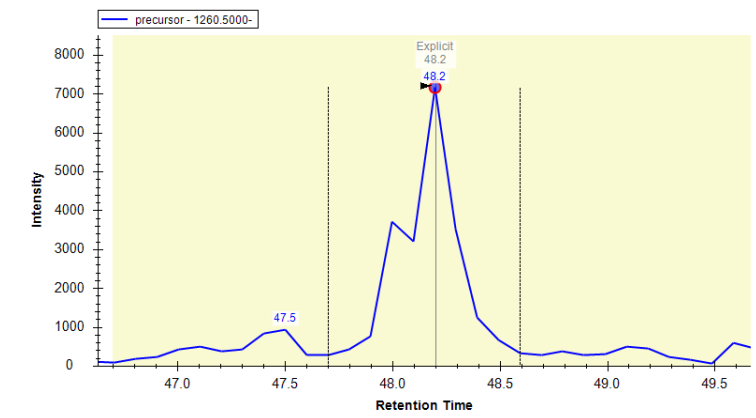

IL\_XB\_NG\_260717 #4787 RT: 48.27 AV: 1 NL: 2.03E1  
F: ITMS - p ESI d Full ms2 1260.55@cid35.00 [335.00-;

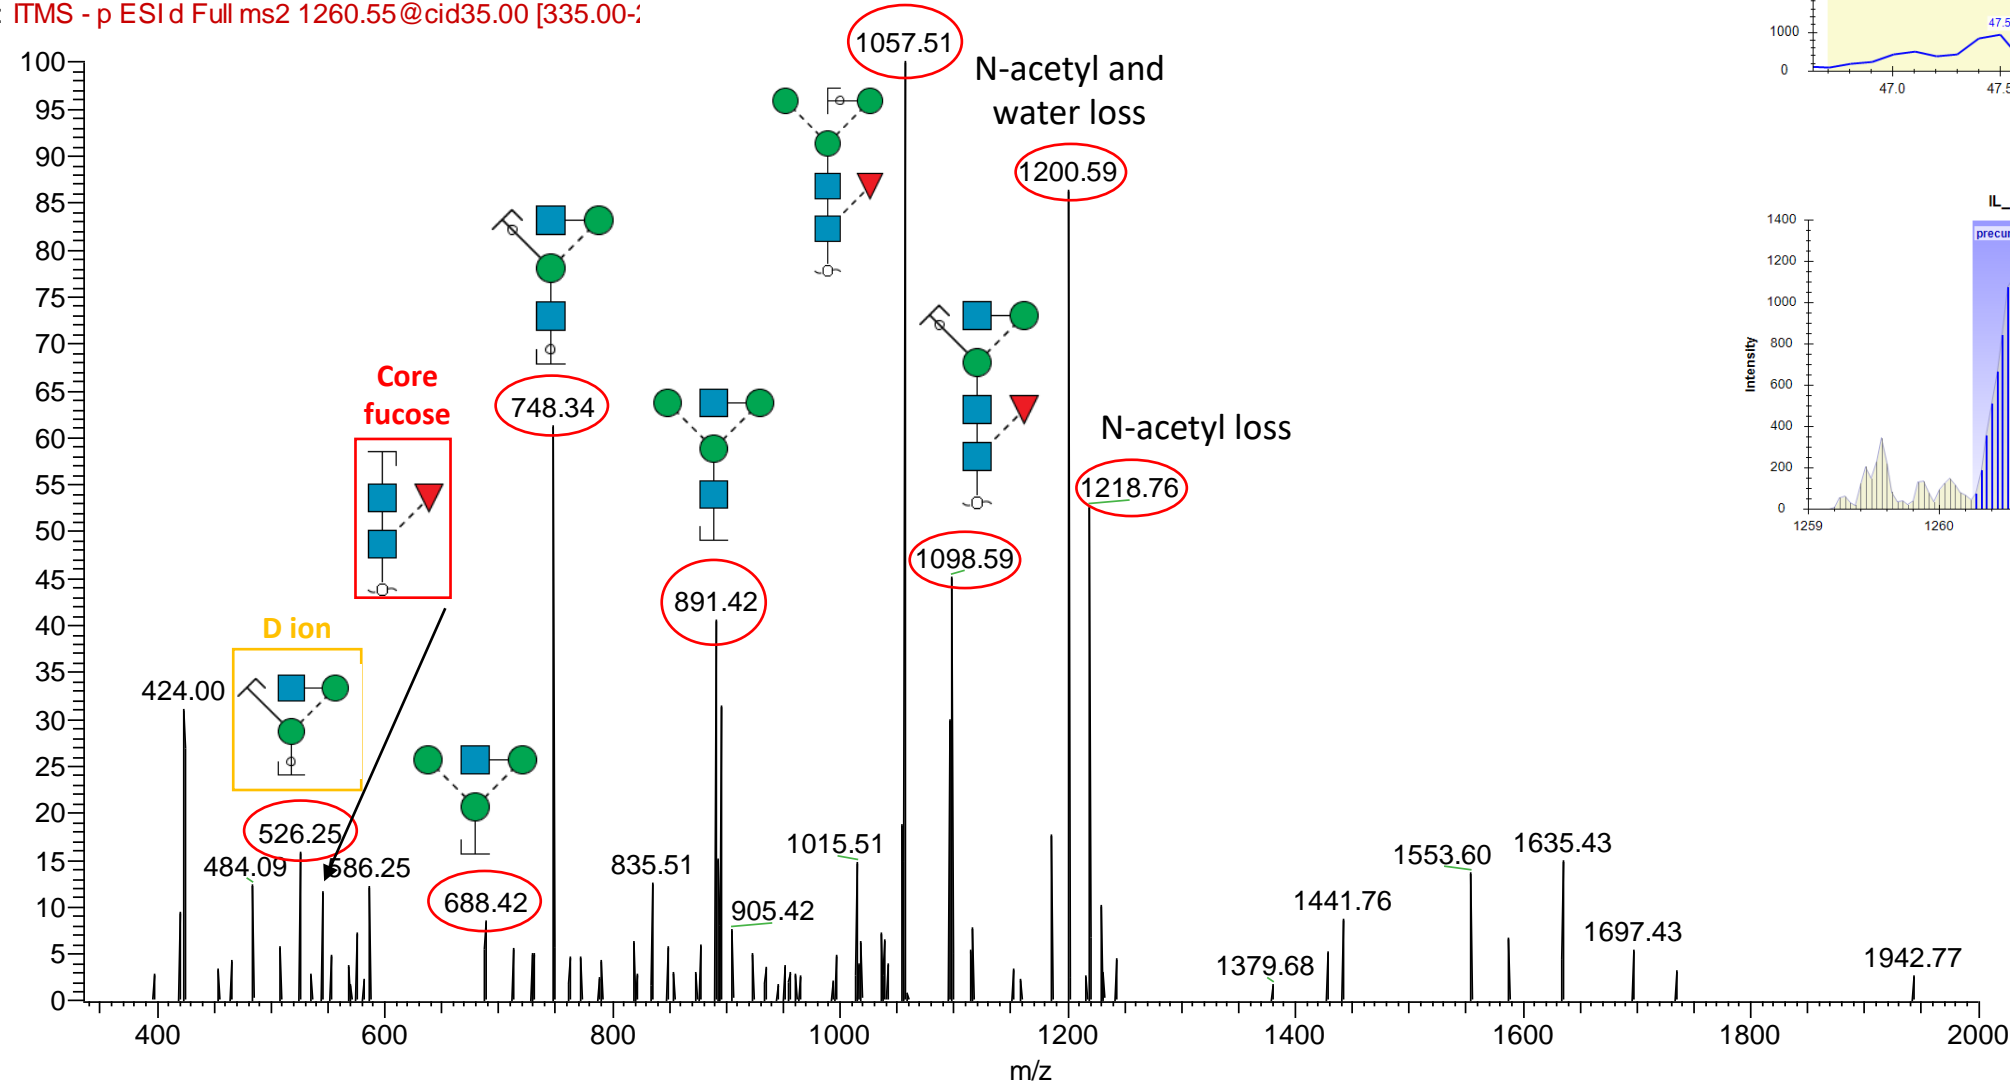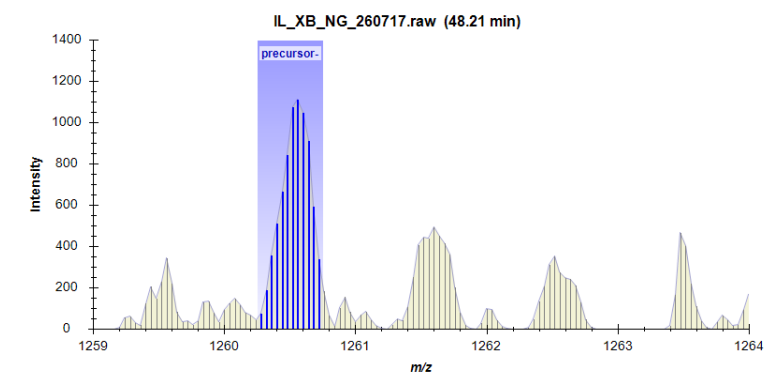

Note: Evidence of core fucose and GlcNAc extension of  $\alpha$ 1,6 arm as evidenced by D ion.

# Glycan #21

Complex

HexNAc<sub>2</sub> + Hex<sub>3</sub>HexNAc<sub>2</sub>Fuc<sub>1</sub>

*m/z*: 731.3<sup>(2-)</sup>

IL\_XB\_NG\_260717 #3936 RT: 39.59 AV: 1 NL: 1.53E1  
F: ITMS - p ESI d Full ms2 731.28@cid35.00 [190.00-1]

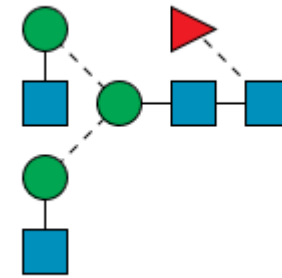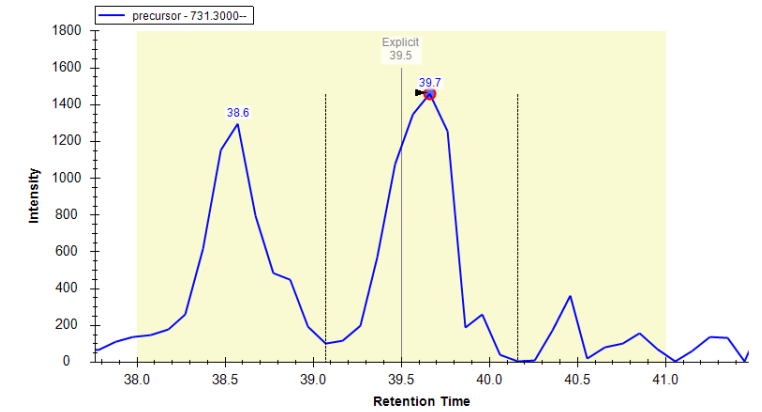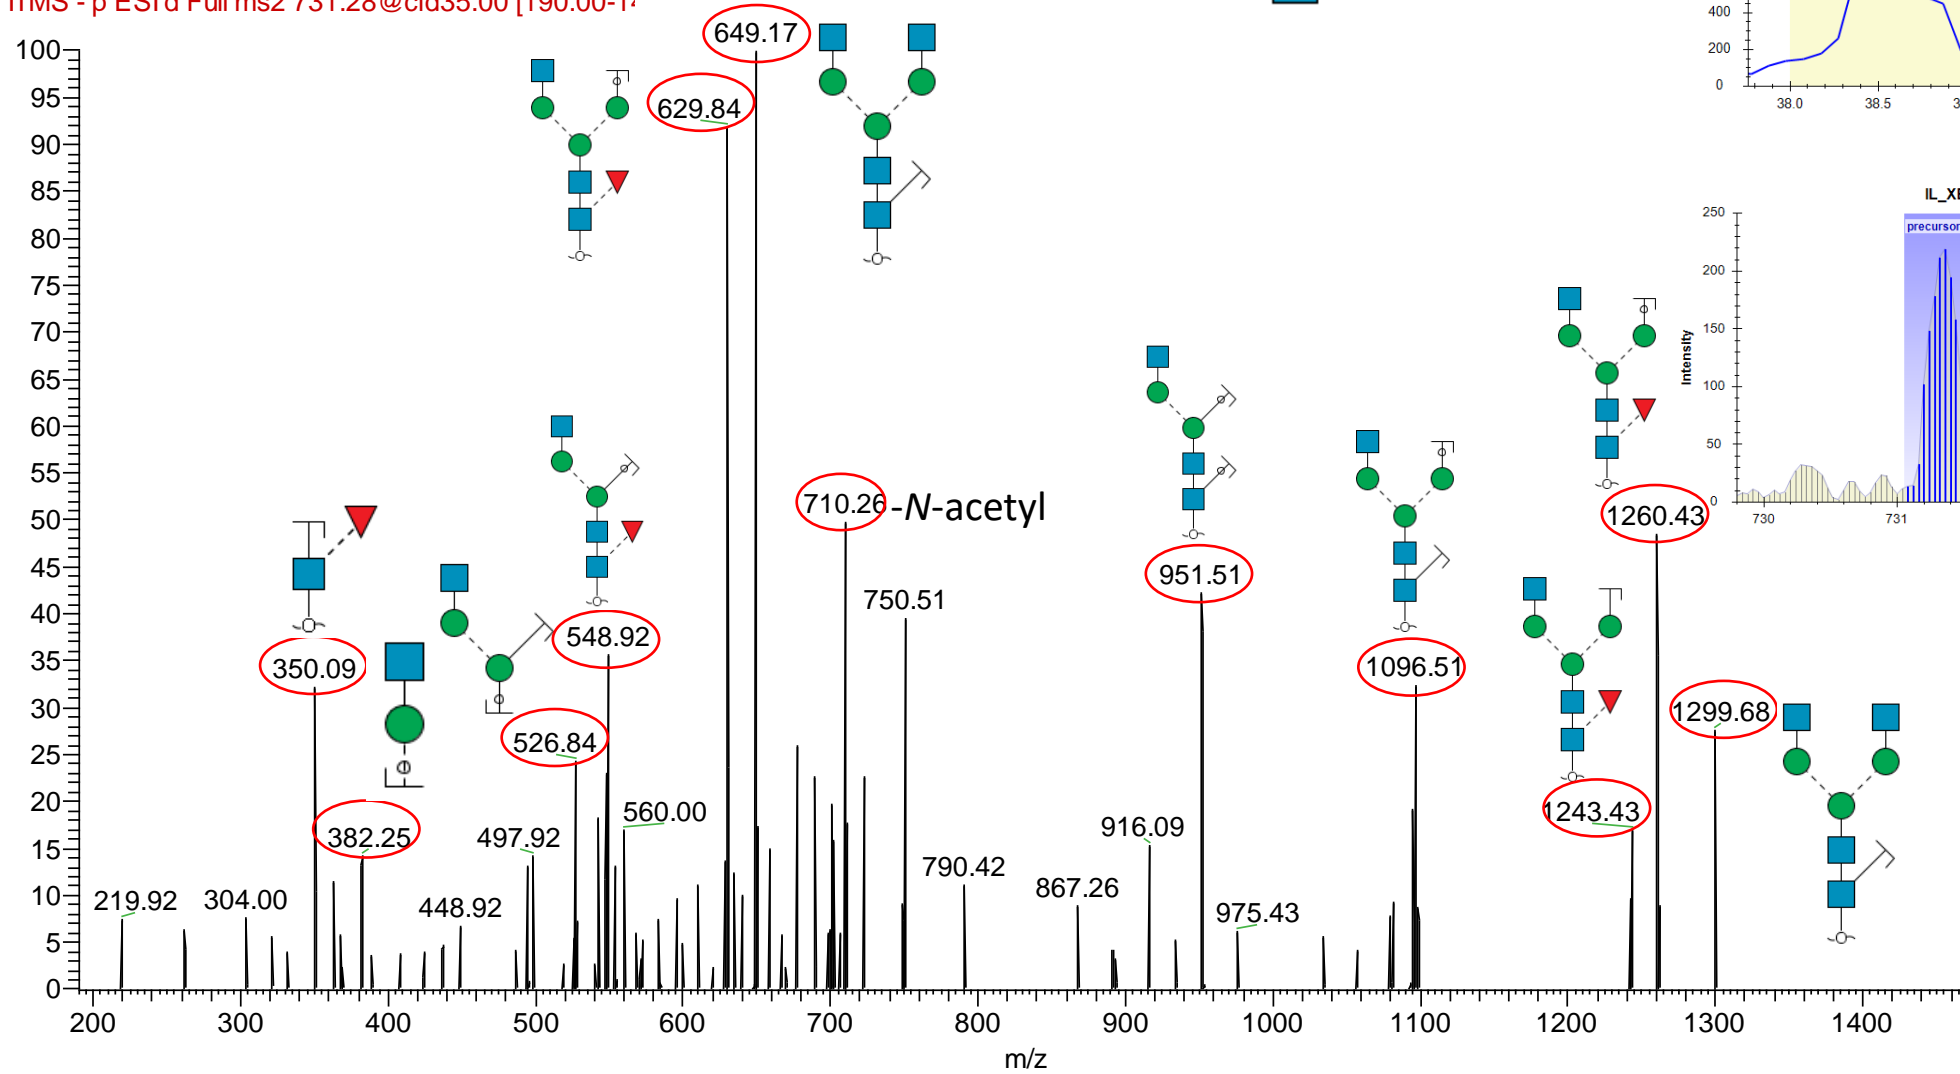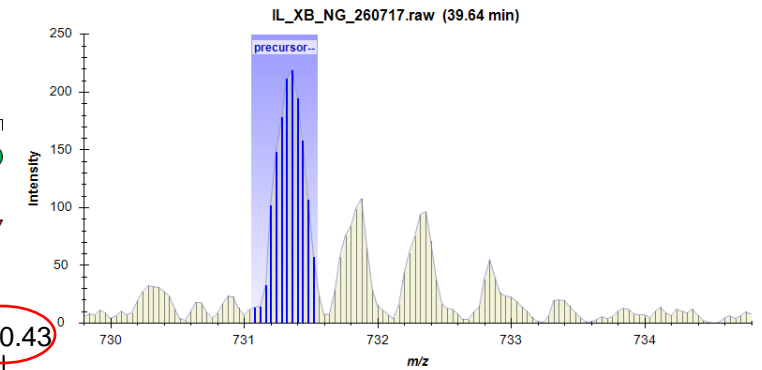

Note: Evidence of core fucose.

# Glycan #22a

## Complex

Hex<sub>1</sub>HexNAc<sub>1</sub>NeuAc<sub>1</sub> + Hex<sub>2</sub>HexNAc<sub>2</sub>Fuc<sub>1</sub>

*m/z*: 775.3<sup>(2-)</sup>

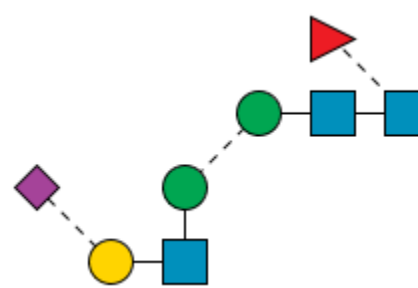

IL\_VB\_NG\_260717 #3534 RT: 35.34 AV: 1 NL: 8.53E1  
F: ITMS - p ESI d Full ms2 775.33@cid35.00 [200.00-1!

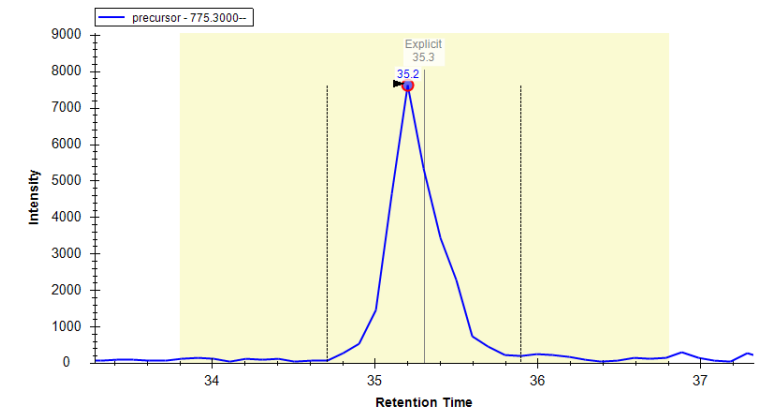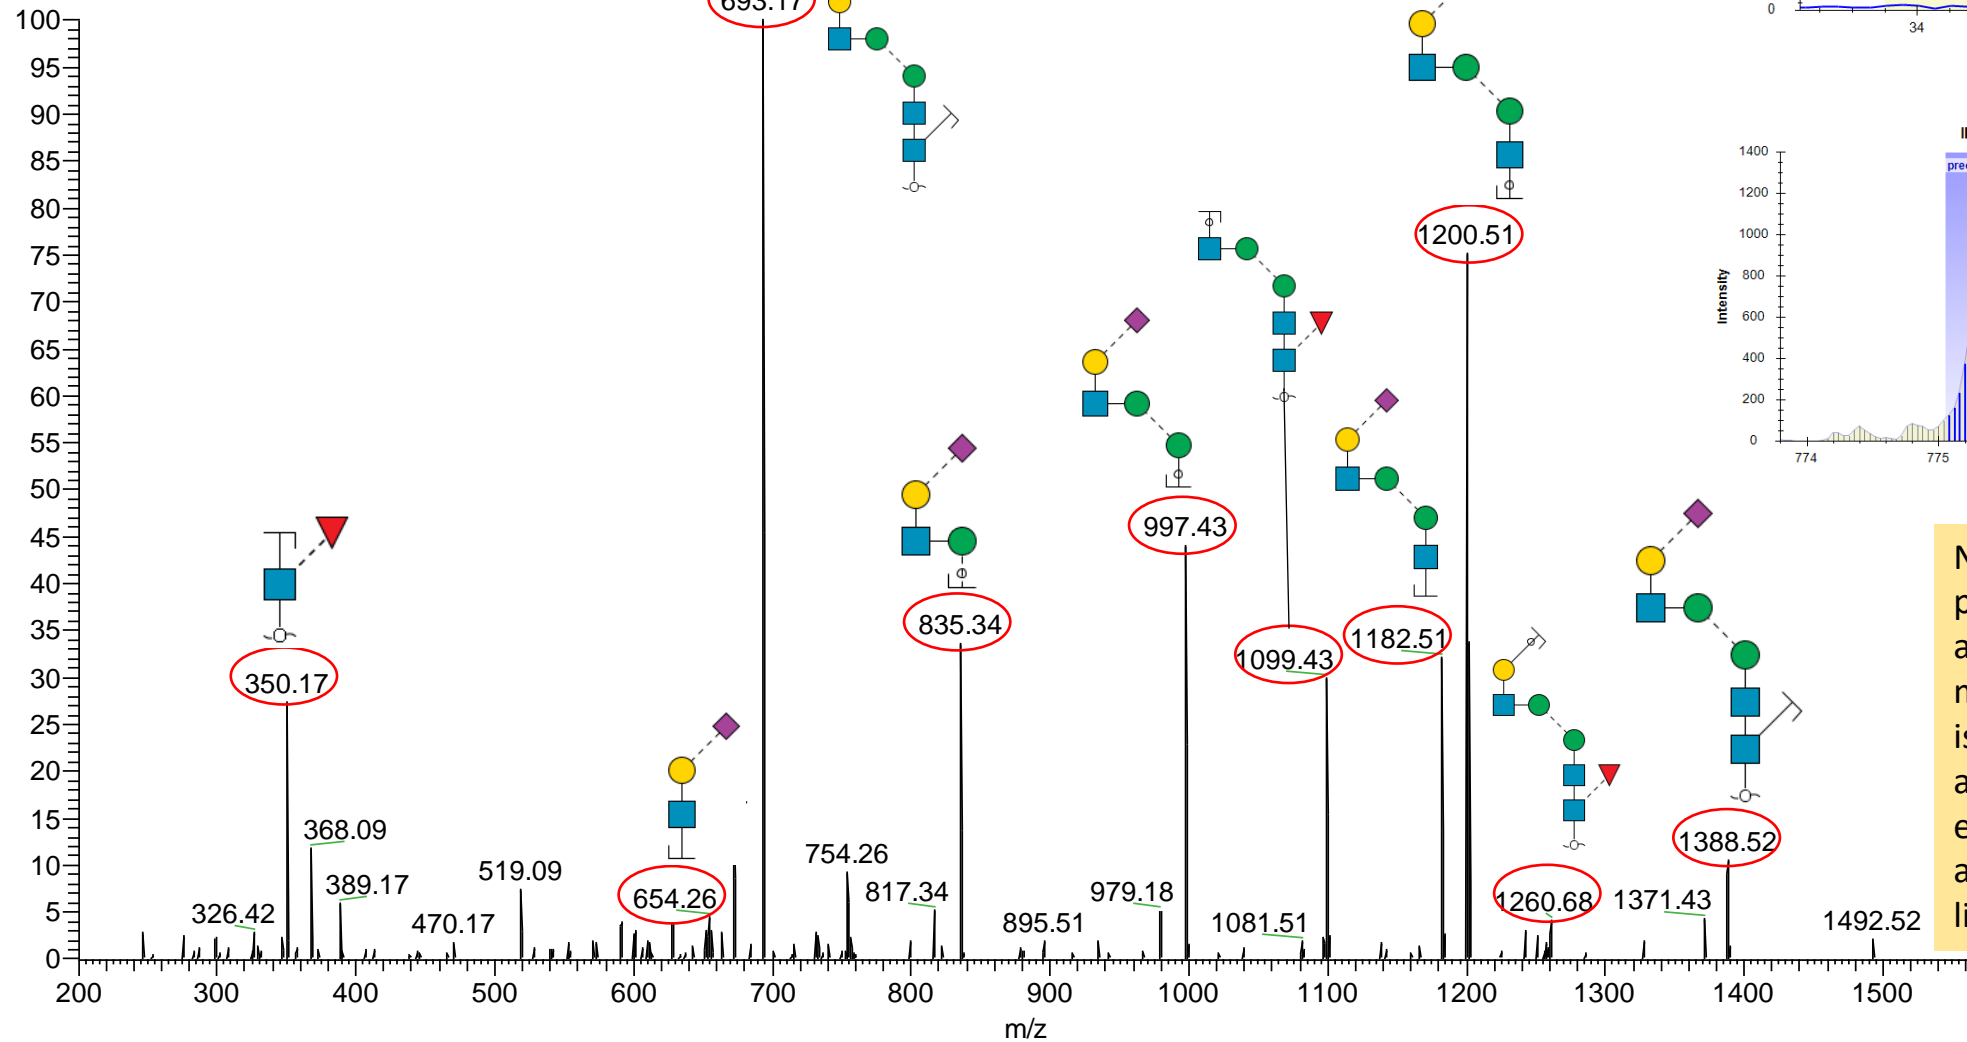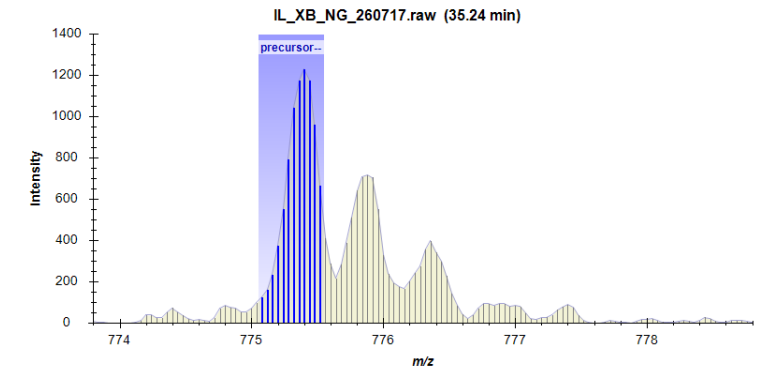

Note: From biosynthetic pathway and the lack of D and/or D-18 ions, monoantennary sialyl LacNAc is predicted to occupy the  $\alpha$ 1,3 arm. Based on early PGC-LC elution, this glycan is annotated as the  $\alpha$ 2,6-sialyl linkage isomer.



# Glycan #22b

Complex

Hex<sub>1</sub>HexNAc<sub>1</sub>NeuAc<sub>1</sub> + Hex<sub>2</sub>HexNAc<sub>2</sub>Fuc<sub>1</sub>

*m/z*: 775.3<sup>(2-)</sup>

IL\_VB\_NG\_260717 #4838 RT: 48.72 AV: 1 NL: 4.31E1

F: ITMS - p ESI d Full ms2 775.33@cid35.00 [200.00-1!

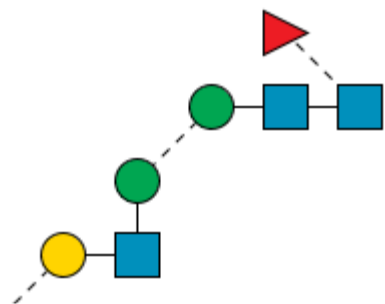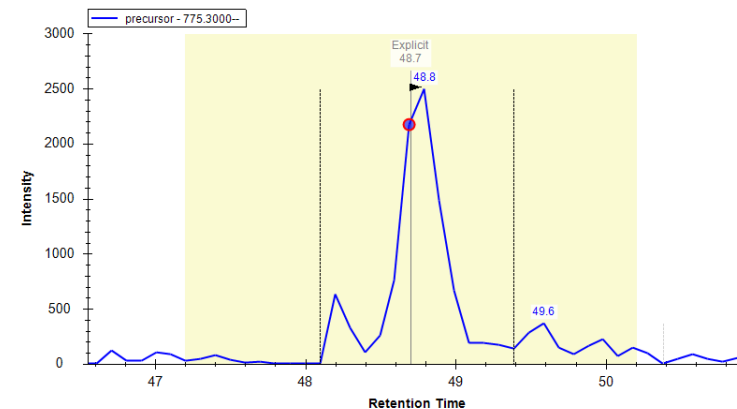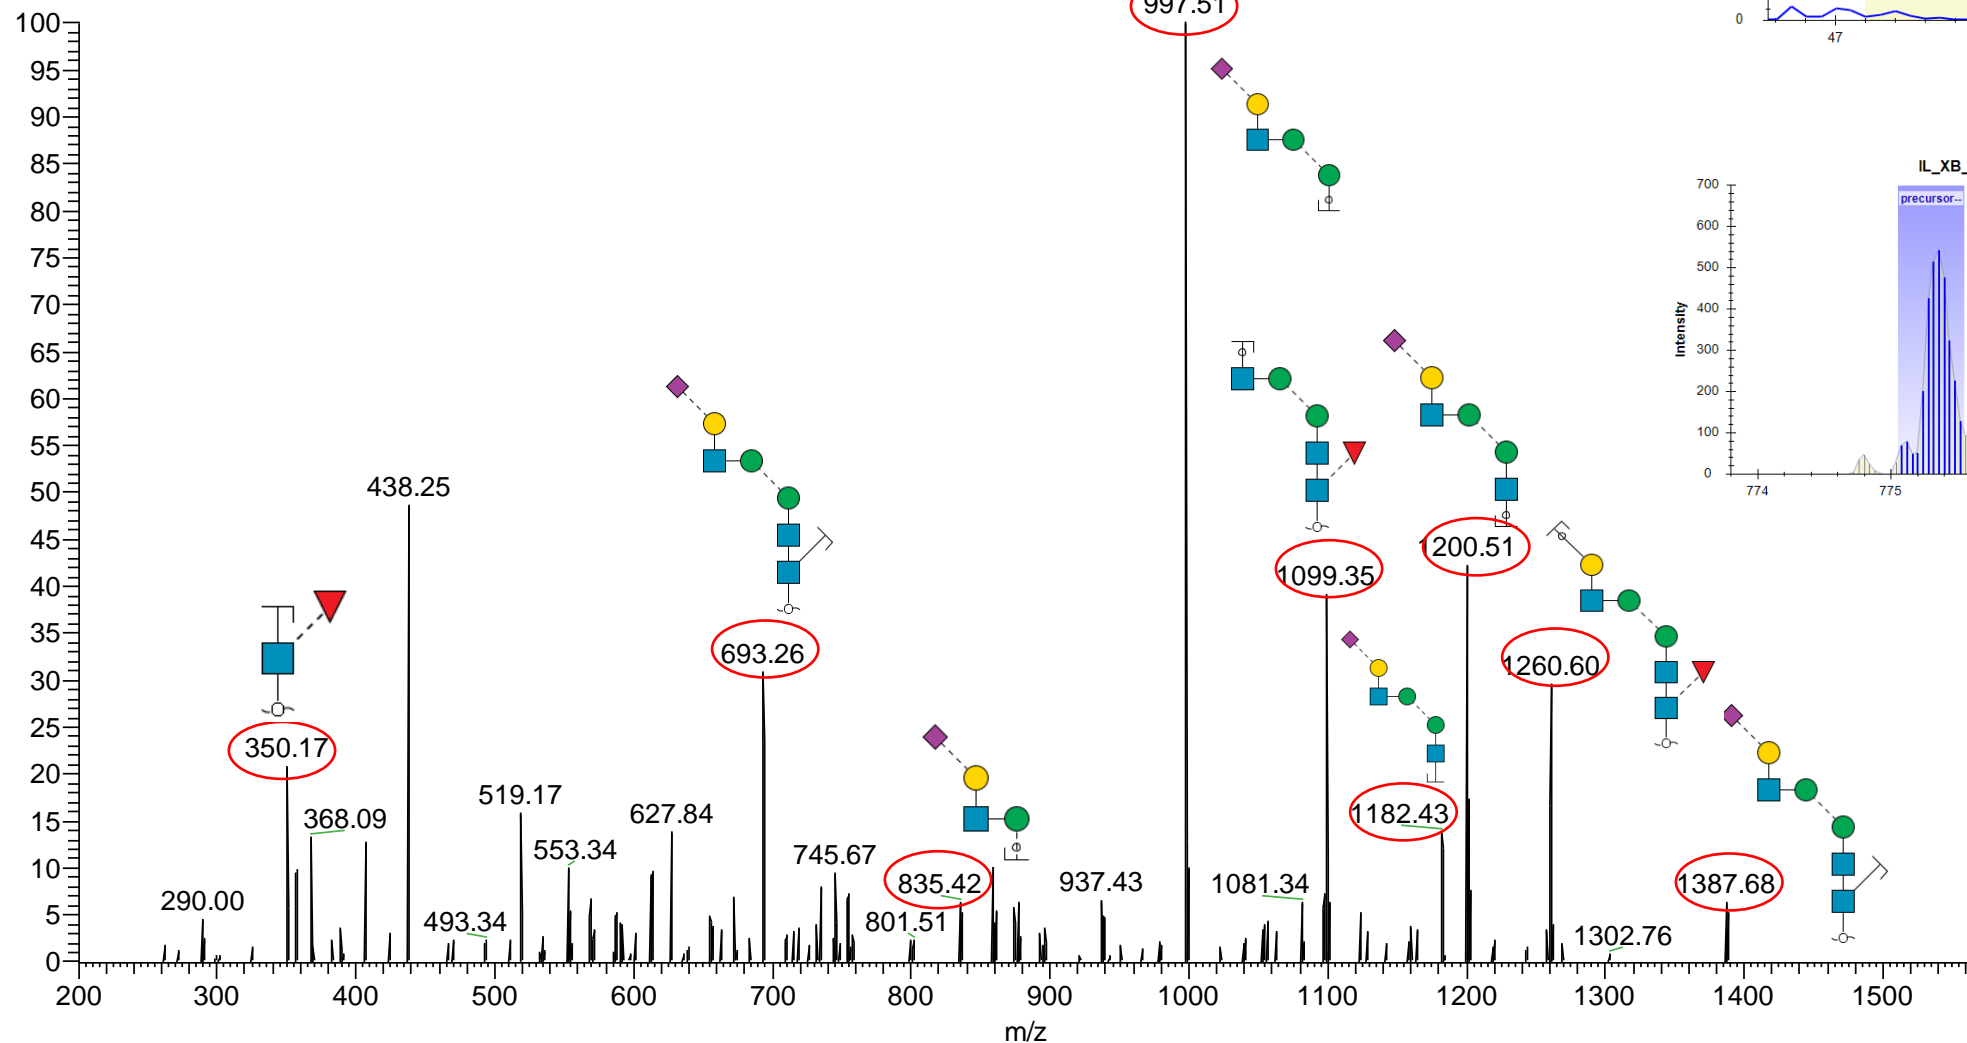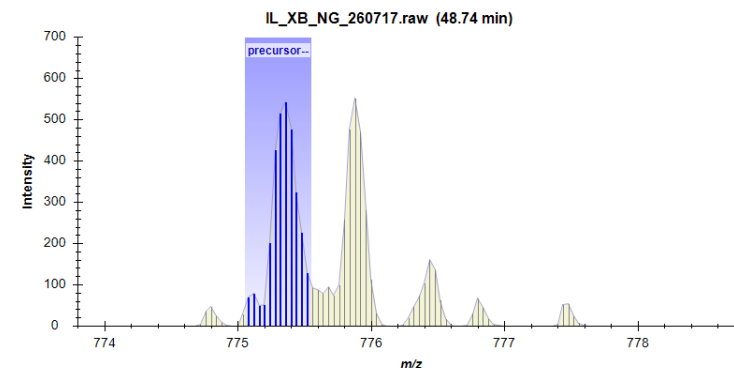

Note: From biosynthetic pathway and the lack of D and/or D-18 ions, monoantennary sialyl LacNAc is predicted to occupy the  $\alpha$ 1,3 arm. Based on late PGC-LC elution, this glycan is annotated as the  $\alpha$ 2,3-sialyl linkage isomer.

# Glycan #23

Complex

Hex<sub>1</sub>HexNAc<sub>1</sub>NeuAc<sub>1</sub> + Hex<sub>3</sub>HexNAc<sub>2</sub>

*m/z*: 783.3<sup>(2-)</sup>

IL\_VB\_NG\_260717 #3182 RT: 31.72 AV: 1 NL: 1.20E2

F: ITMS - p ESI d Full ms2 783.20@cid35.00 [205.00-1!]

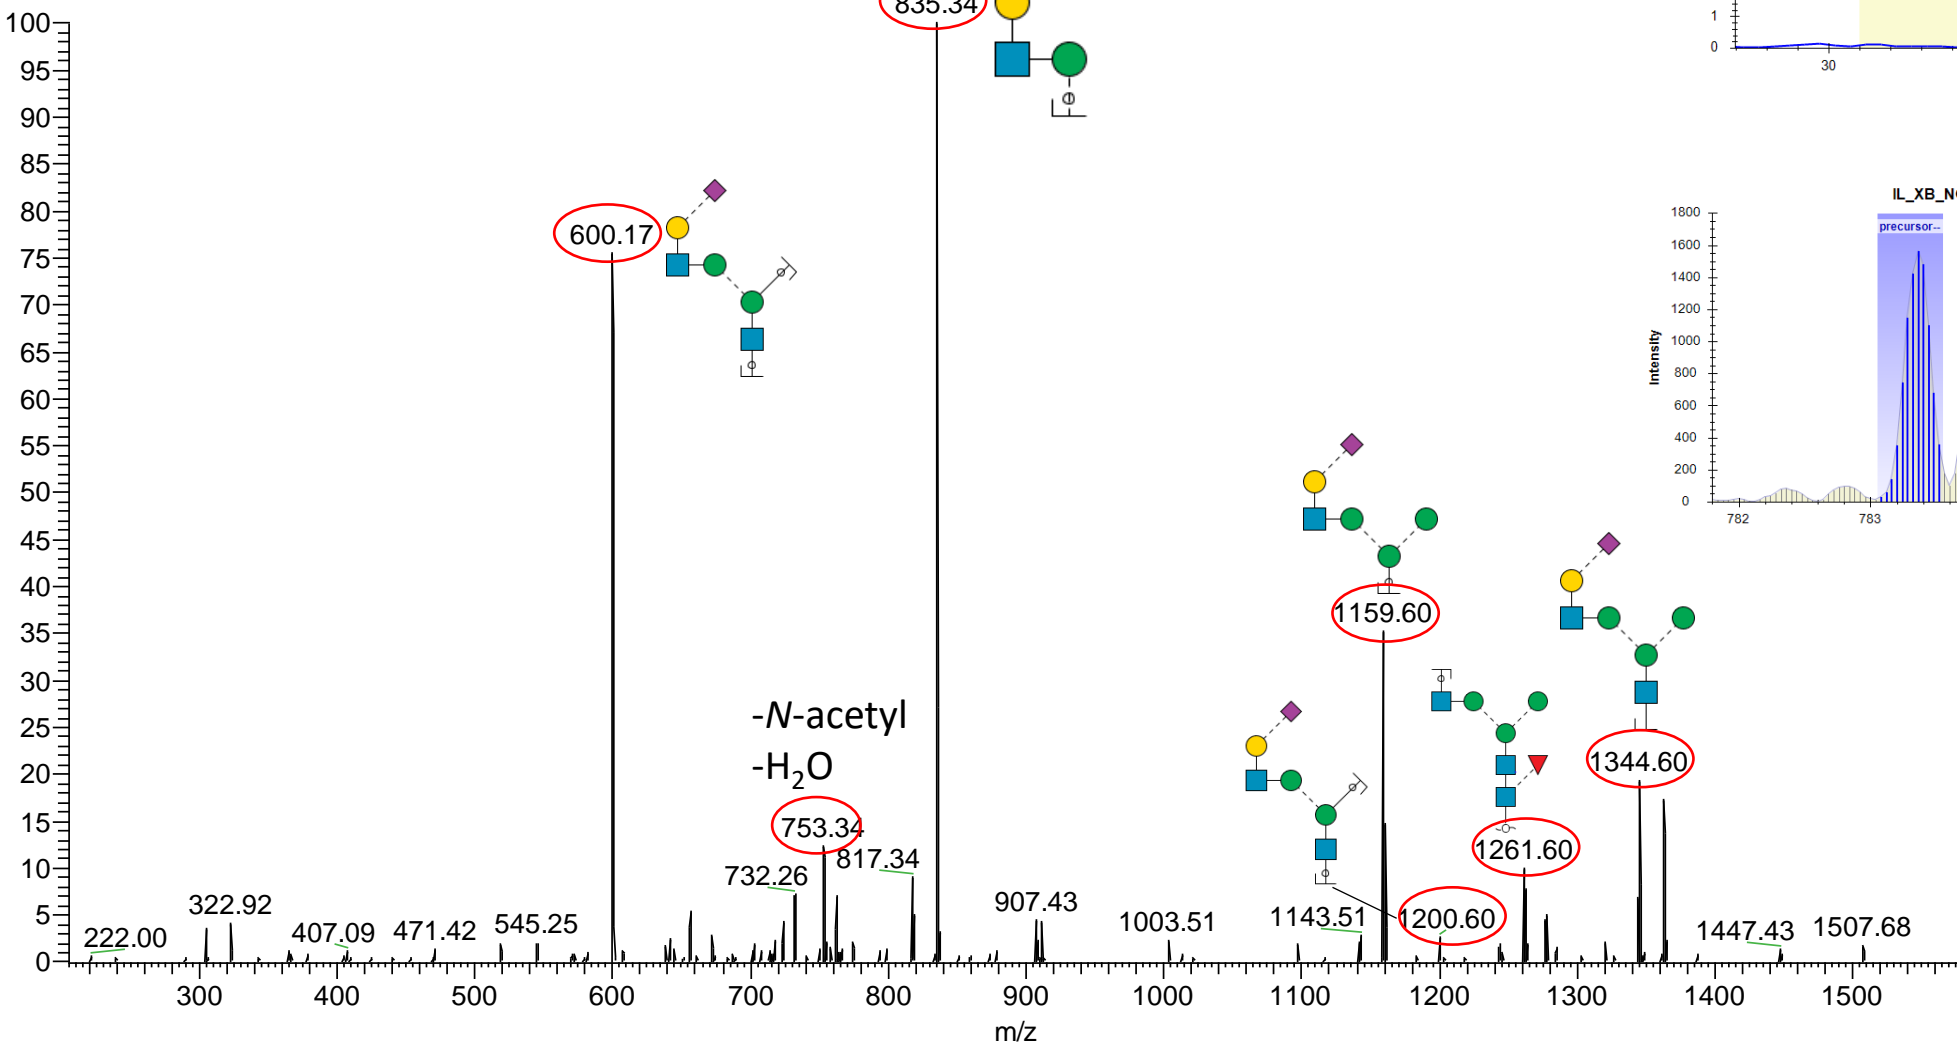

-N-acetyl  
-H<sub>2</sub>O

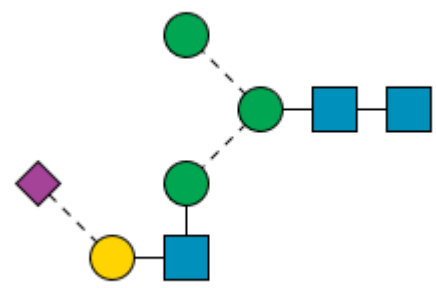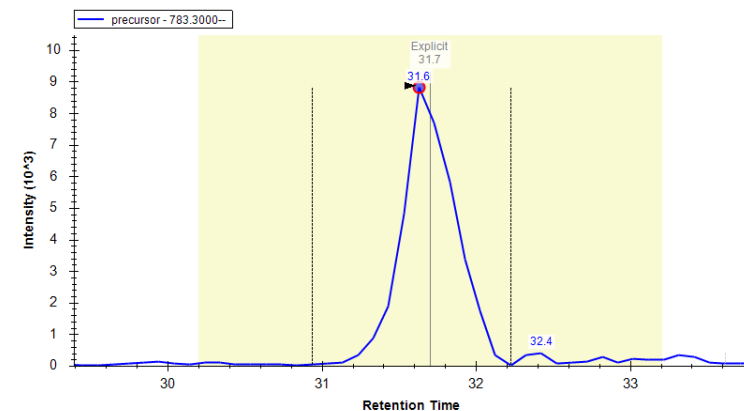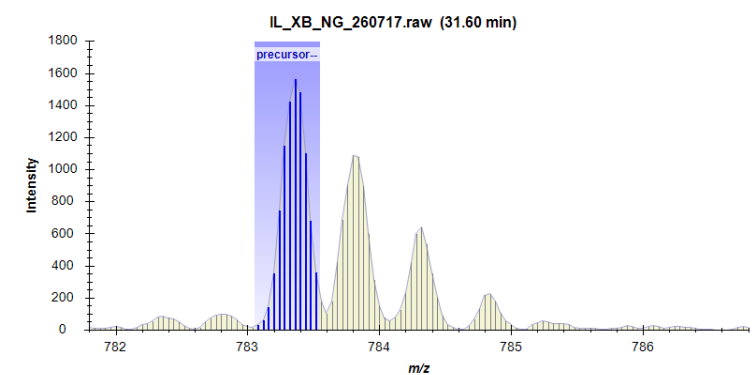

Note: From biosynthetic pathway and the lack of D and/or D-18 ions, monoantennary sialyl LacNAc is predicted to occupy the α1,3 arm. Based on early PGC-LC elution, this glycan is annotated as the α2,6-sialyl linkage isomer.

# Glycan #24

## Complex

Hex<sub>1</sub>HexNAc<sub>1</sub>Fuc<sub>1</sub> + Hex<sub>3</sub>HexNAc<sub>2</sub>Fuc<sub>1</sub>

*m/z*: 783.6<sup>(2-)</sup>

IL\_XB\_NG\_260717 #3823 RT: 38.43 AV: 1 NL: 6.28E1

F: ITMS - p ESI d Full ms2 783.83@cid35.00 [205.00-1!

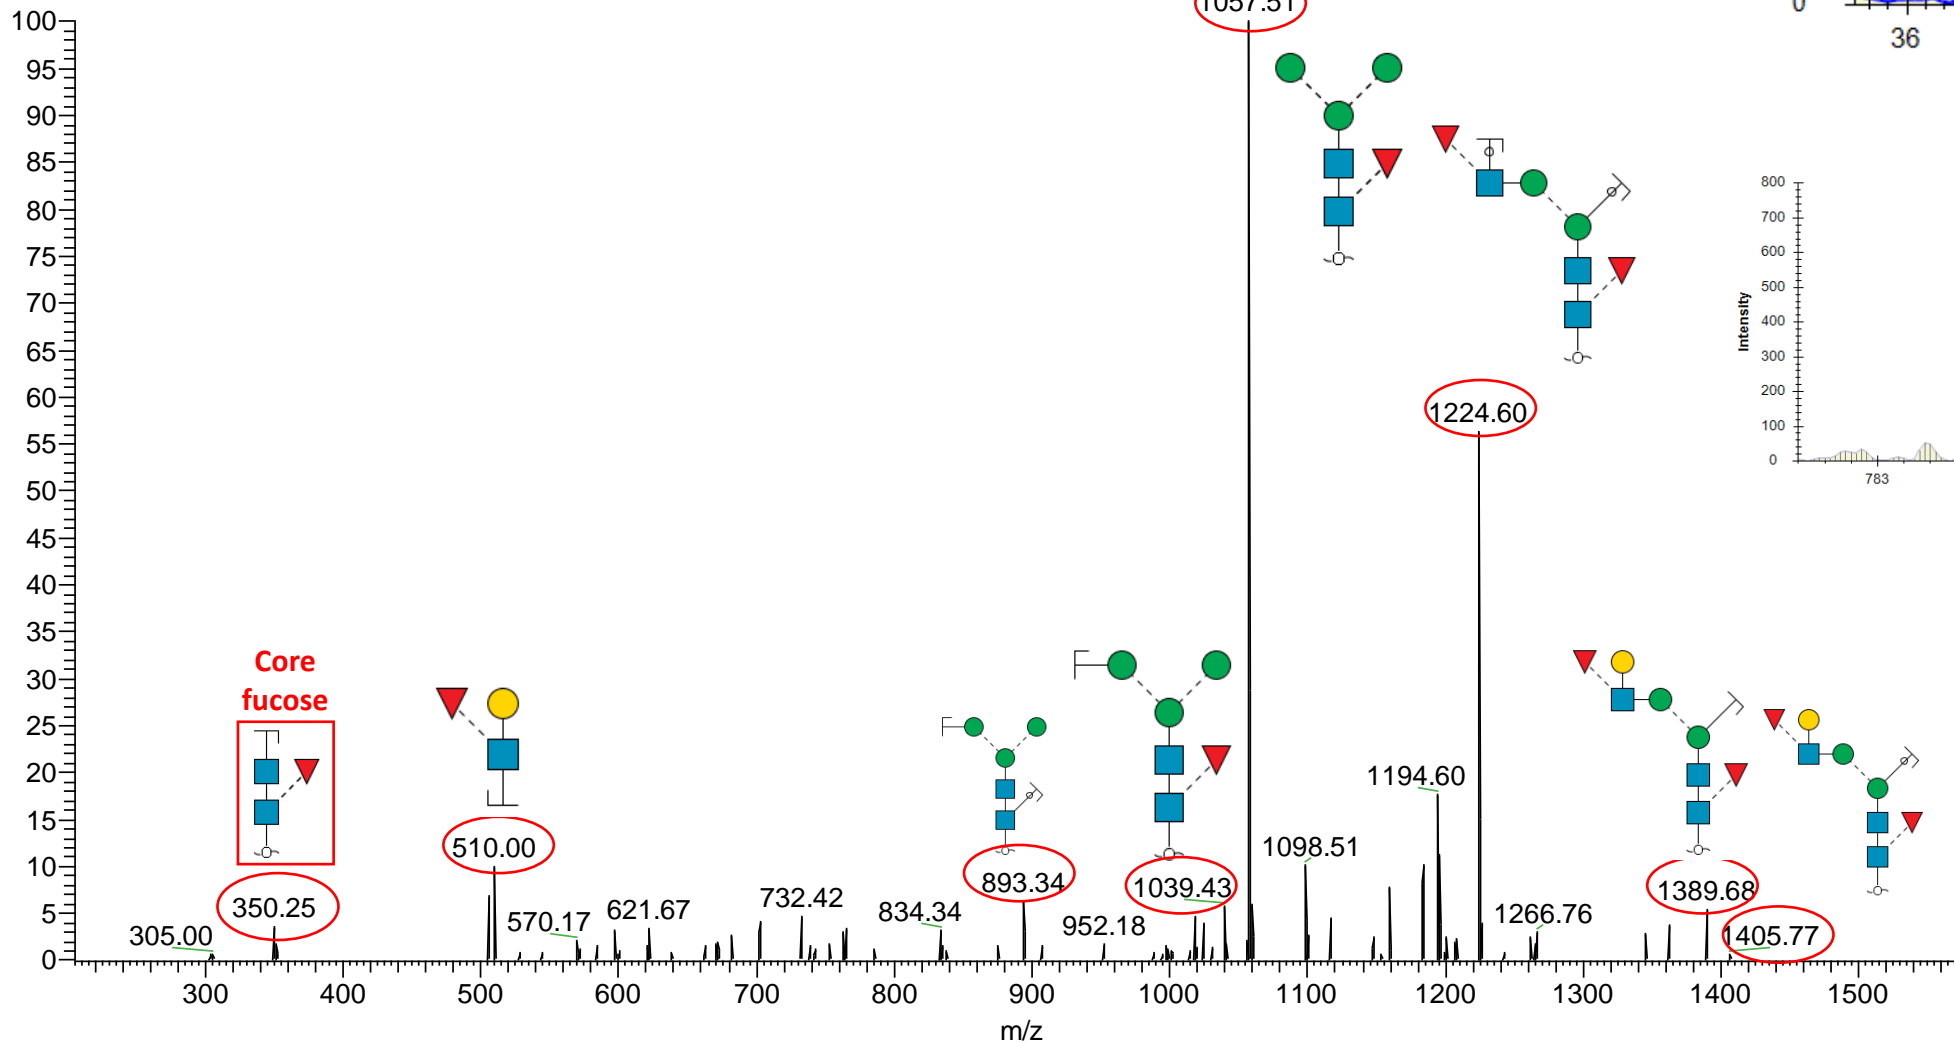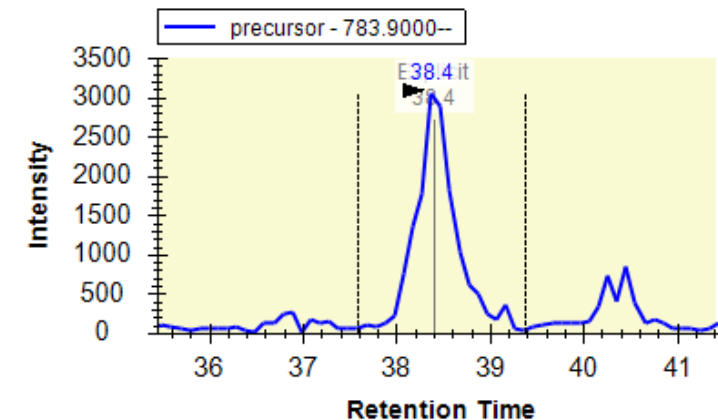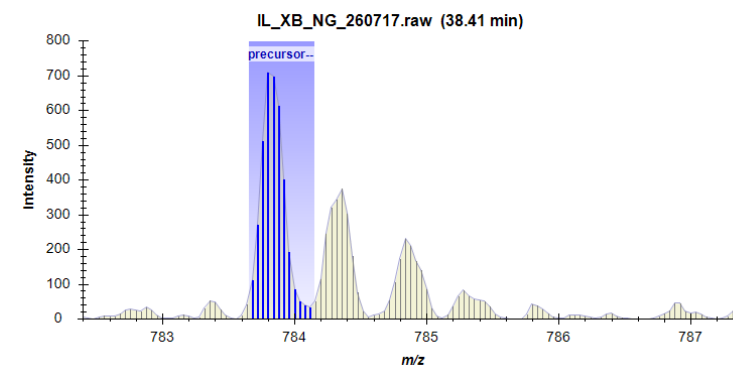

Note: Both evidence of core and antenna fucosylation. From biosynthetic pathway and the lack of D and/or D-18 ions, monoantennary Le x/a is predicted to occupy the  $\alpha$ 1,3 arm. The exact antennary fucosyl linkage(s) (here drawn as alpha1,3) remains undetermined.

# Glycan #25

Complex

Hex<sub>2</sub>HexNAc<sub>2</sub> + Hex<sub>3</sub>HexNAc<sub>2</sub>

m/z: 820.3<sup>(2-)</sup>

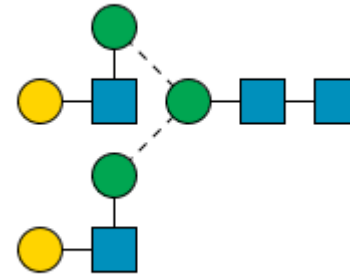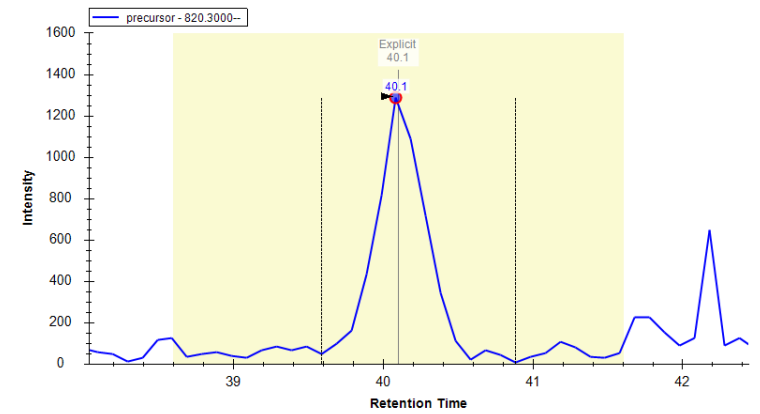

IL\_YC\_NG\_260717 #4007 RT: 40.12 AV: 1 NL: 7.88

F: ITMS - p ESI d Full ms2 820.32@cid35.00 [215.00-11

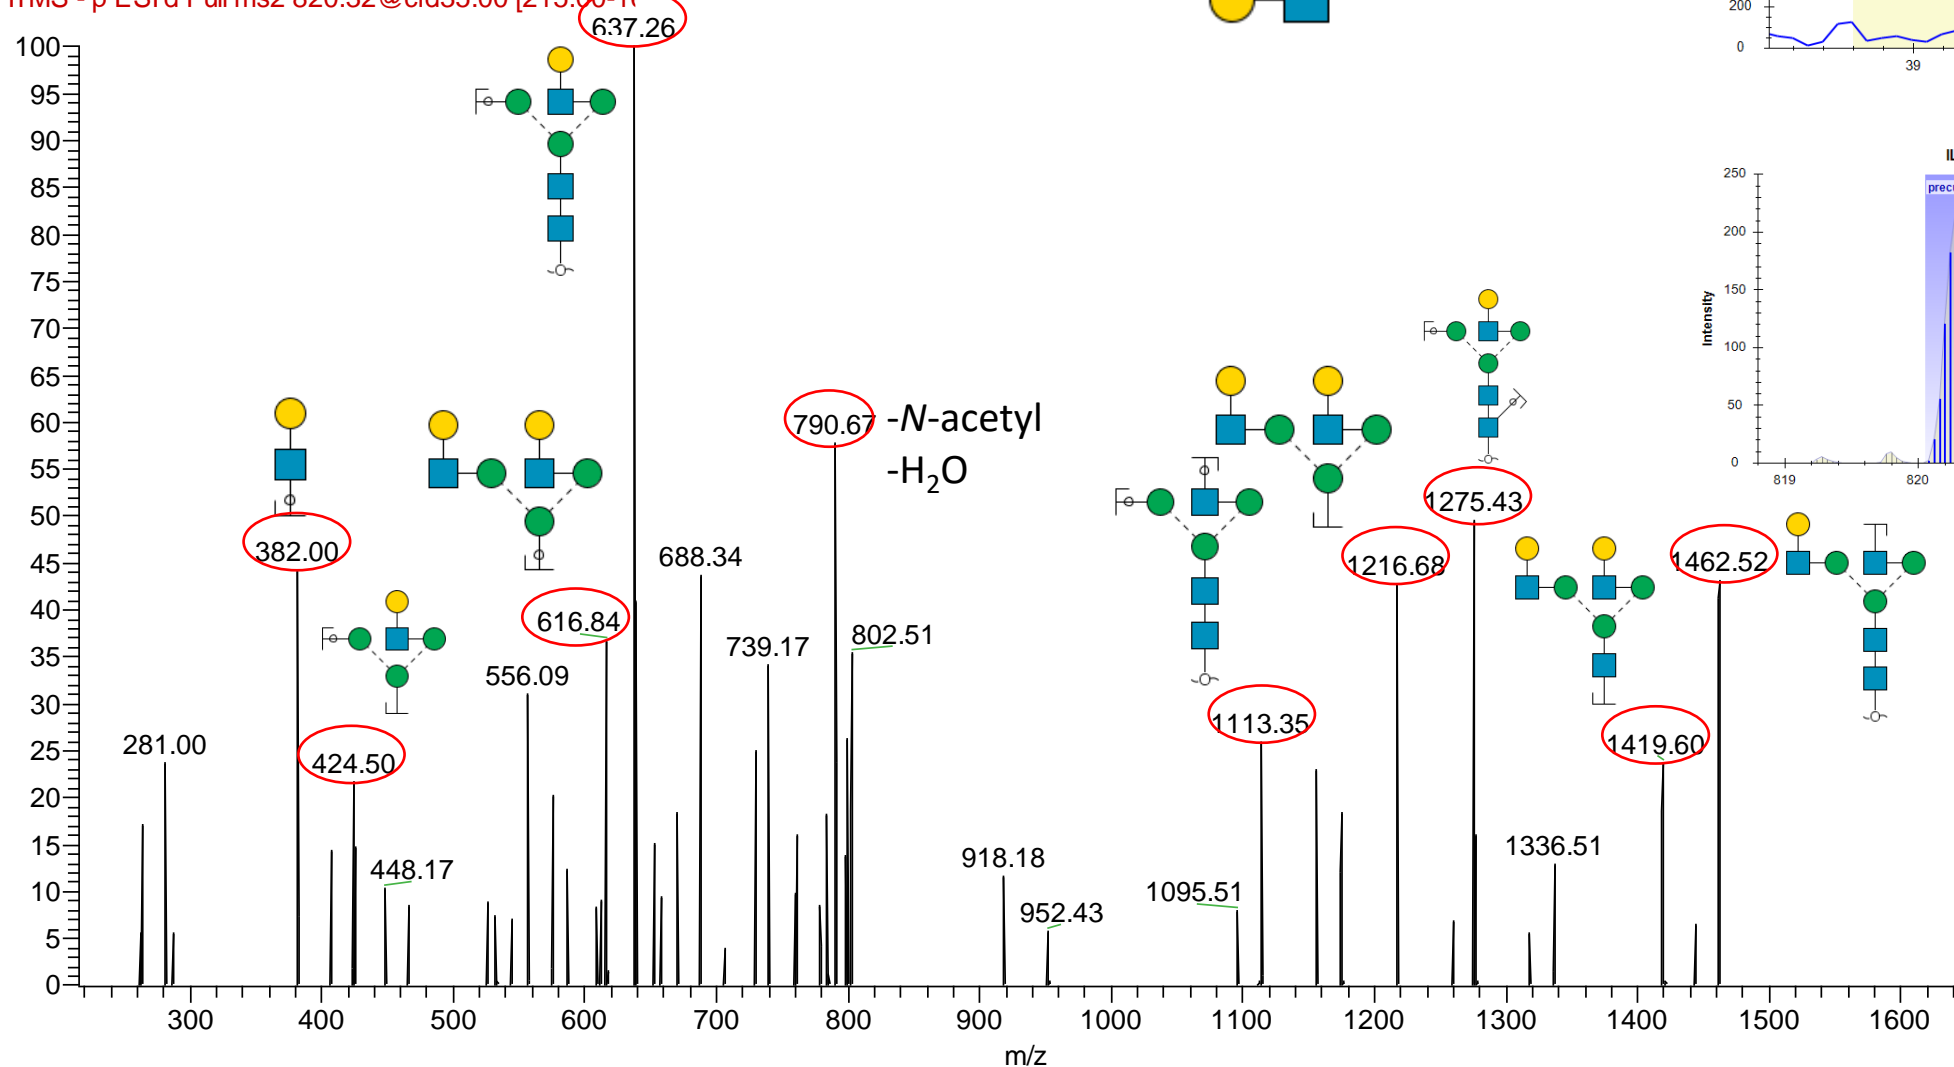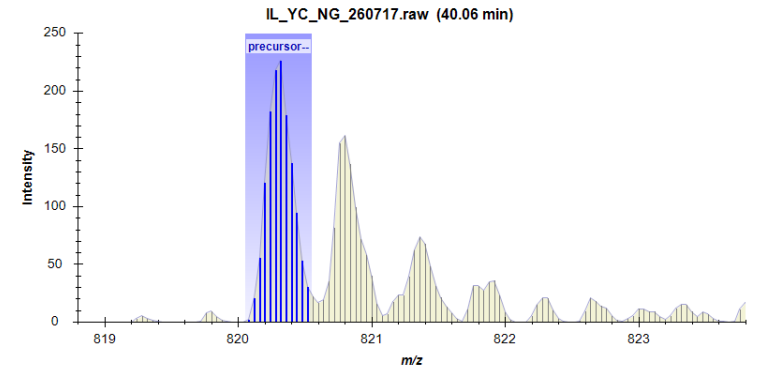

Note: Assigned from good tandem mass spectral evidence and from known biosynthetic pathway

# Glycan #26a

Complex

Hex<sub>1</sub>HexNAc<sub>1</sub>NeuAc<sub>1</sub> + Hex<sub>3</sub>HexNAc<sub>2</sub>Fuc<sub>1</sub>

*m/z*: 856.3<sup>(2-)</sup>

IL\_YC\_NG\_260717 #3942 RT: 39.46 AV: 1 NL: 4.46E2

F: ITMS - p ESI d Full ms2 856.31 @cid35.00 [225.00-1]

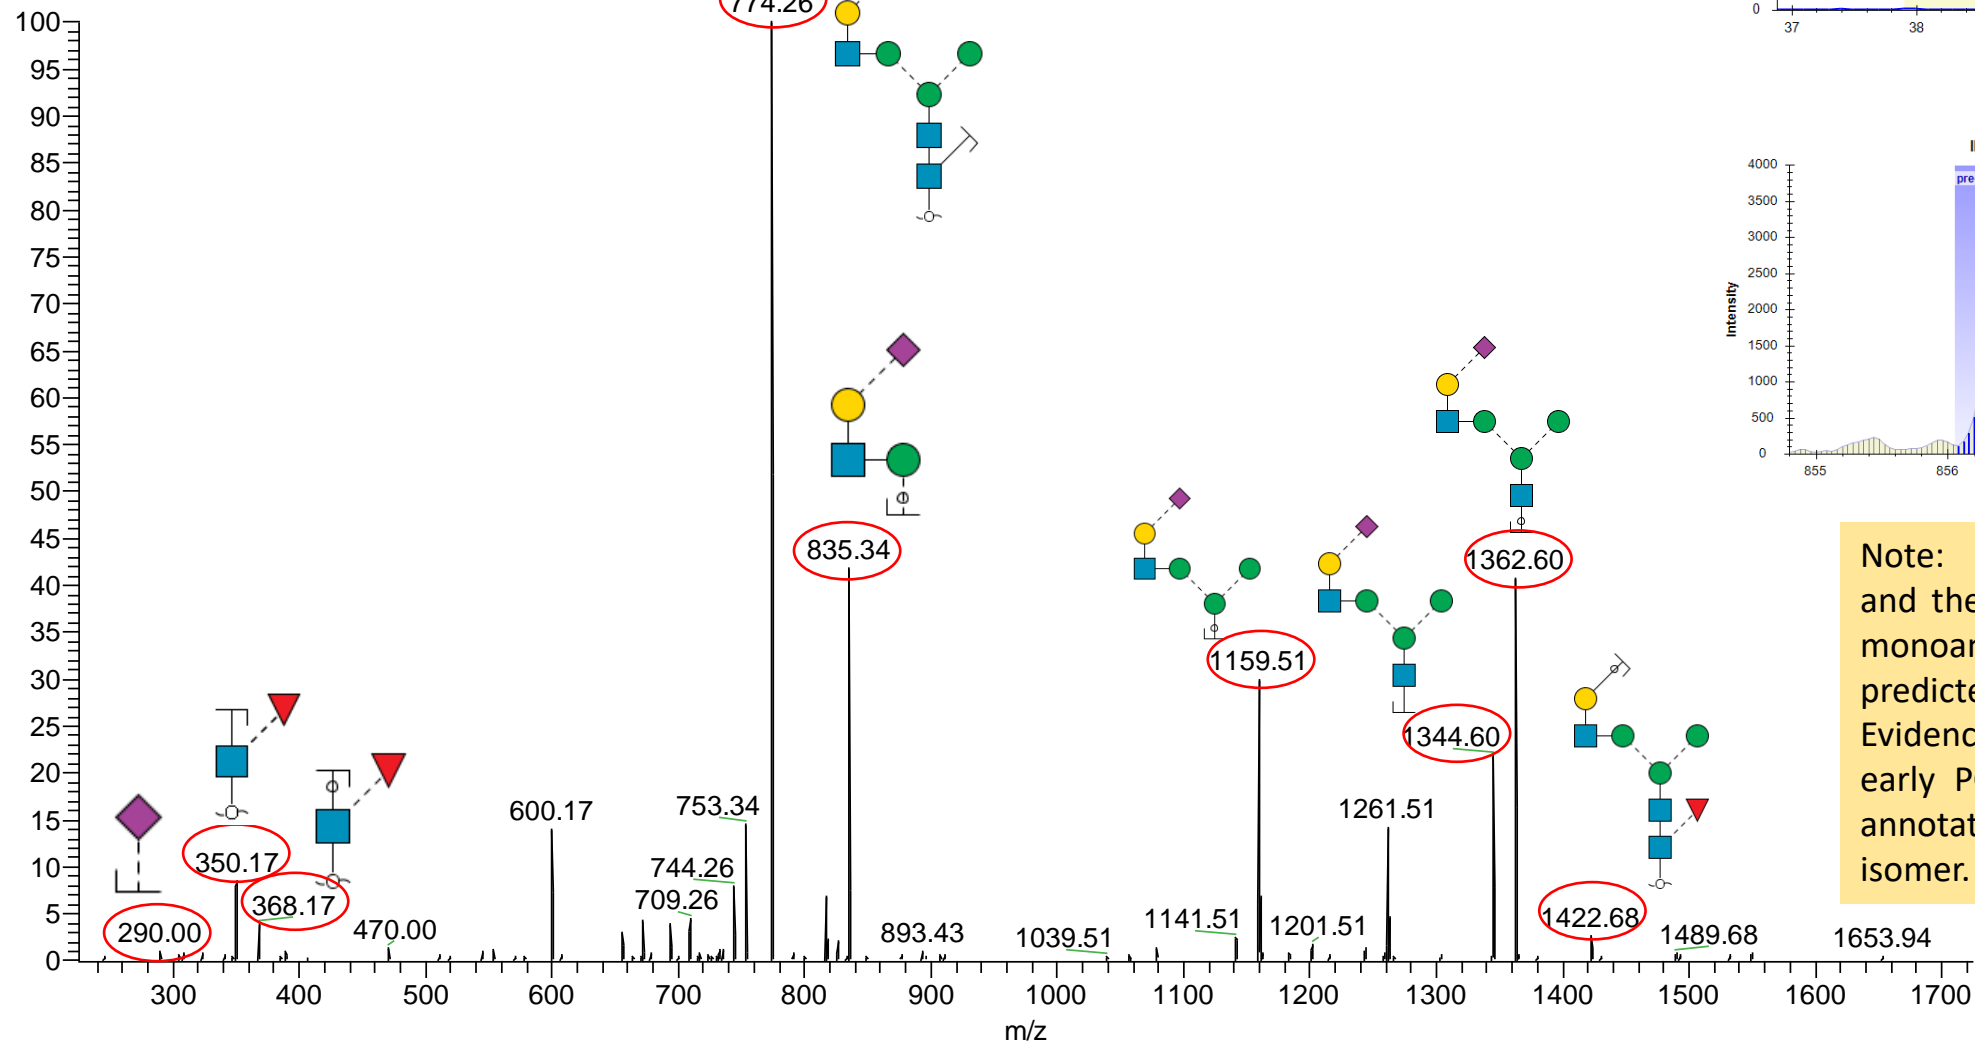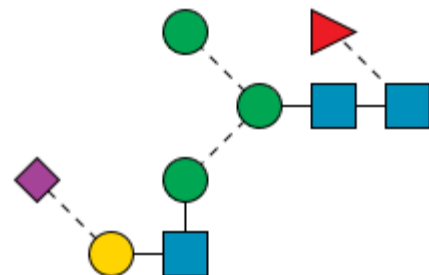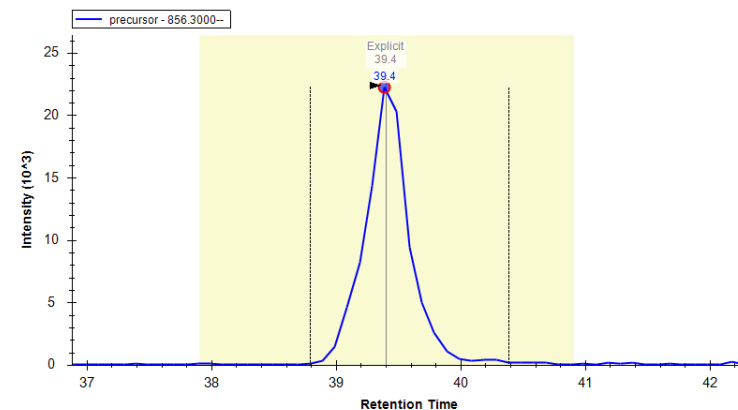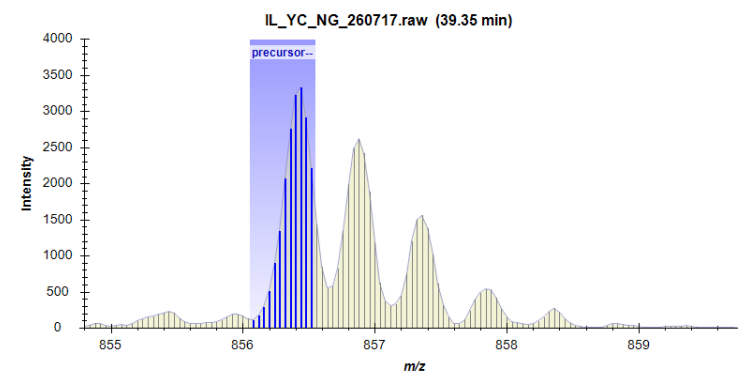

Note: From biosynthetic pathway and the lack of D and/or D-18 ions, monoantennary sialyl LacNAc is predicted to occupy the  $\alpha$ 1,3 arm. Evidence of core fucose. Based on early PGC-LC elution, this glycan is annotated as the  $\alpha$ 2,6-sialyl linkage isomer.

# Glycan #26b

Complex

Hex<sub>1</sub>HexNAc<sub>1</sub>NeuAc<sub>1</sub> + Hex<sub>3</sub>HexNAc<sub>2</sub>Fuc<sub>1</sub>

*m/z*: 856.3<sup>(2-)</sup>

IL\_YC\_NG\_260717 #4726 RT: 47.47 AV: 1 NL: 3.04E1

F: ITMS - p ESI d Full ms2 856.31 @cid35.00 [225.00-1]

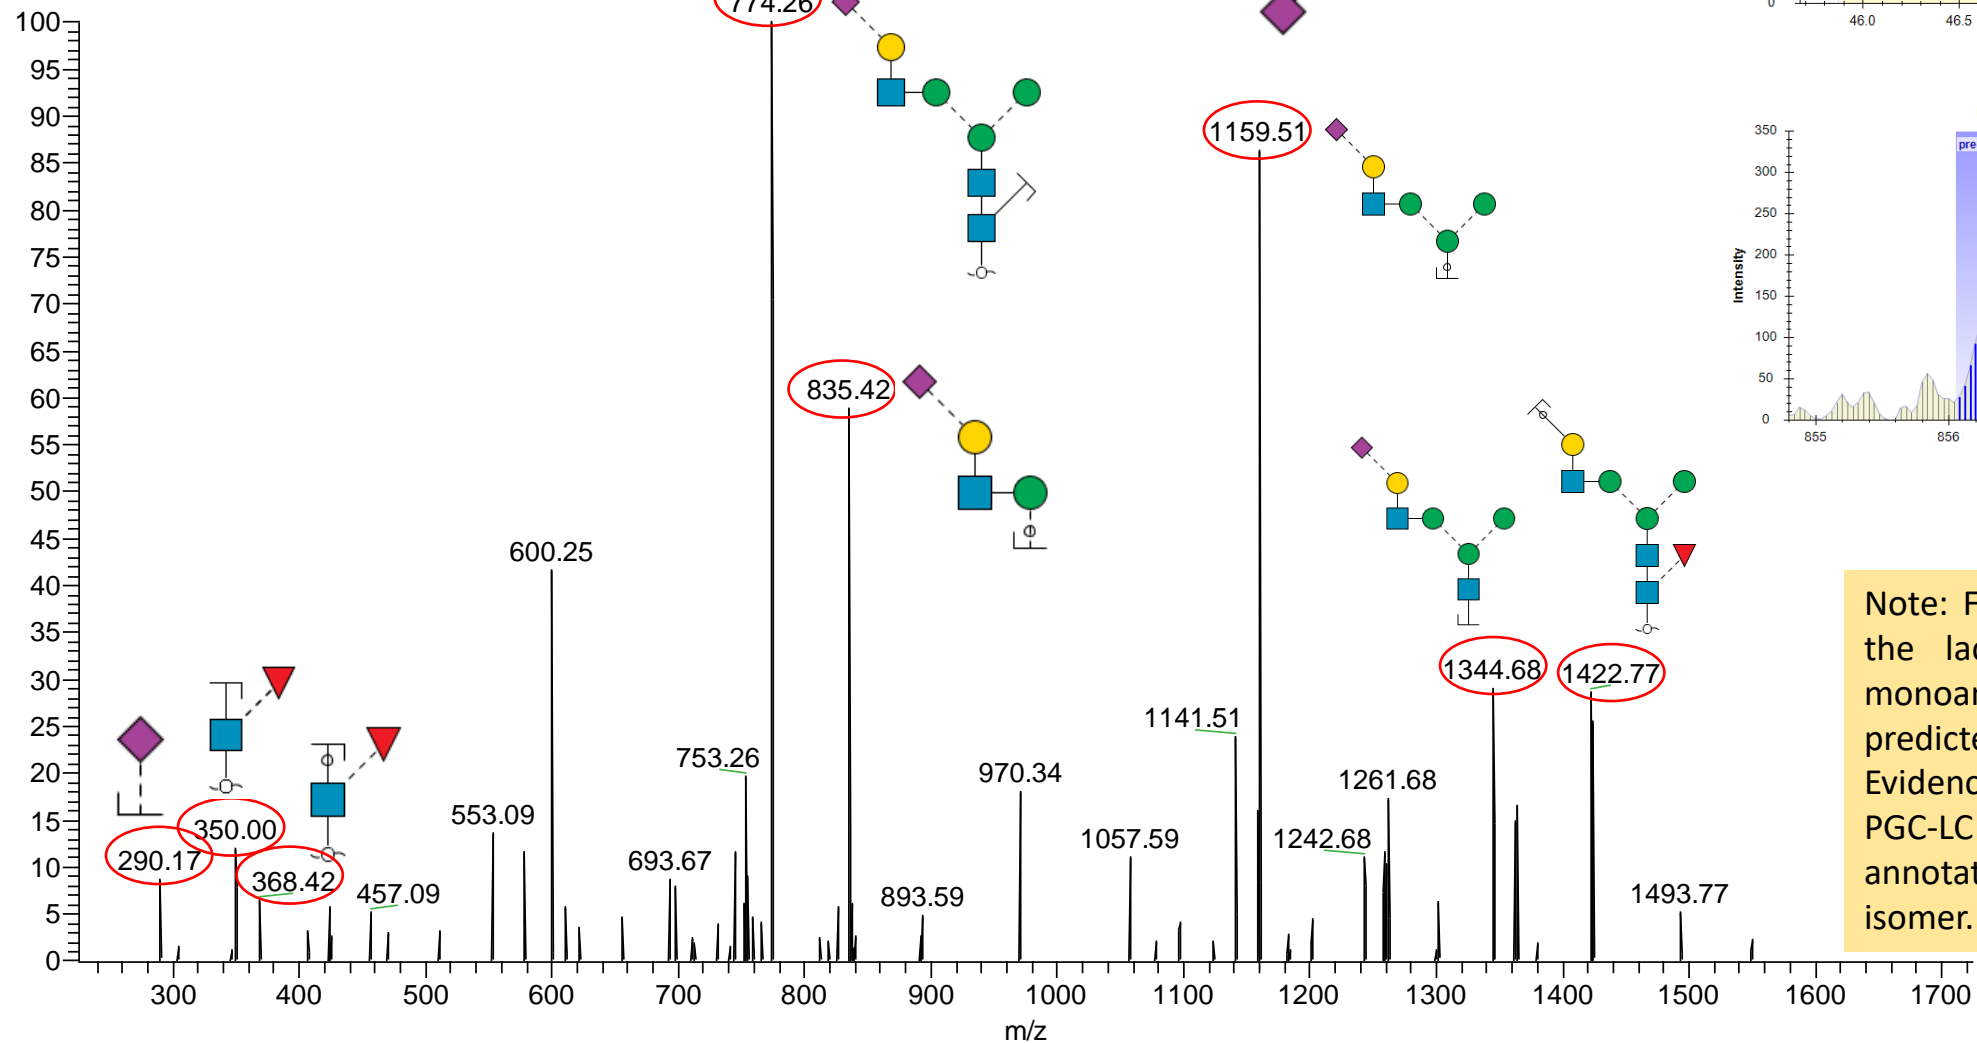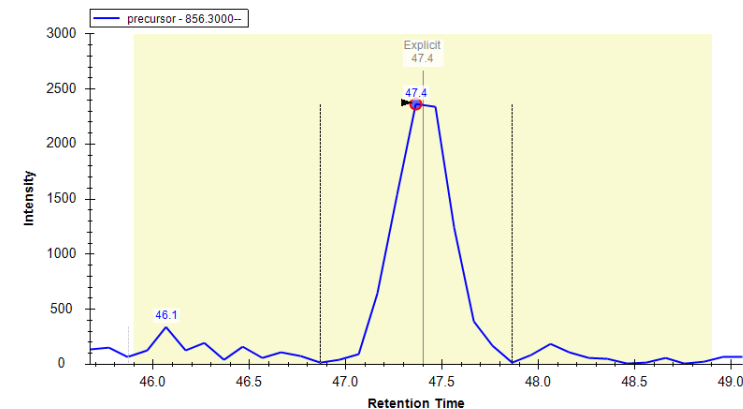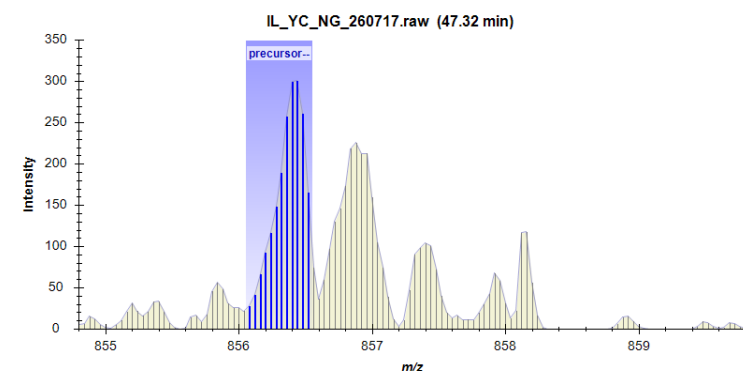

Note: From biosynthetic pathway and the lack of D and/or D-18 ions, monoantennary sialyl LacNAc is predicted to occupy the  $\alpha$ 1,3-arm. Evidence of core fucose. Based on late PGC-LC elution, this glycan is annotated as the  $\alpha$ 2,6-sialyl linkage isomer.

# Glycan #27a

Complex

Hex<sub>2</sub>HexNAc<sub>2</sub>Fuc<sub>1</sub> + Hex<sub>3</sub>HexNAc<sub>2</sub>

*m/z*: 893.3<sup>(2-)</sup>

IL\_YC\_NG\_260717 #3848 RT: 38.51 AV: 1 NL: 4.61  
F: ITMS - p ESI d Full ms2 893.36@cid35.00 [235.00-1]

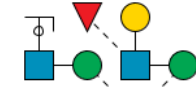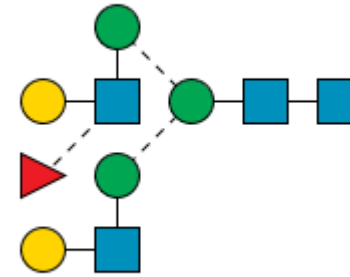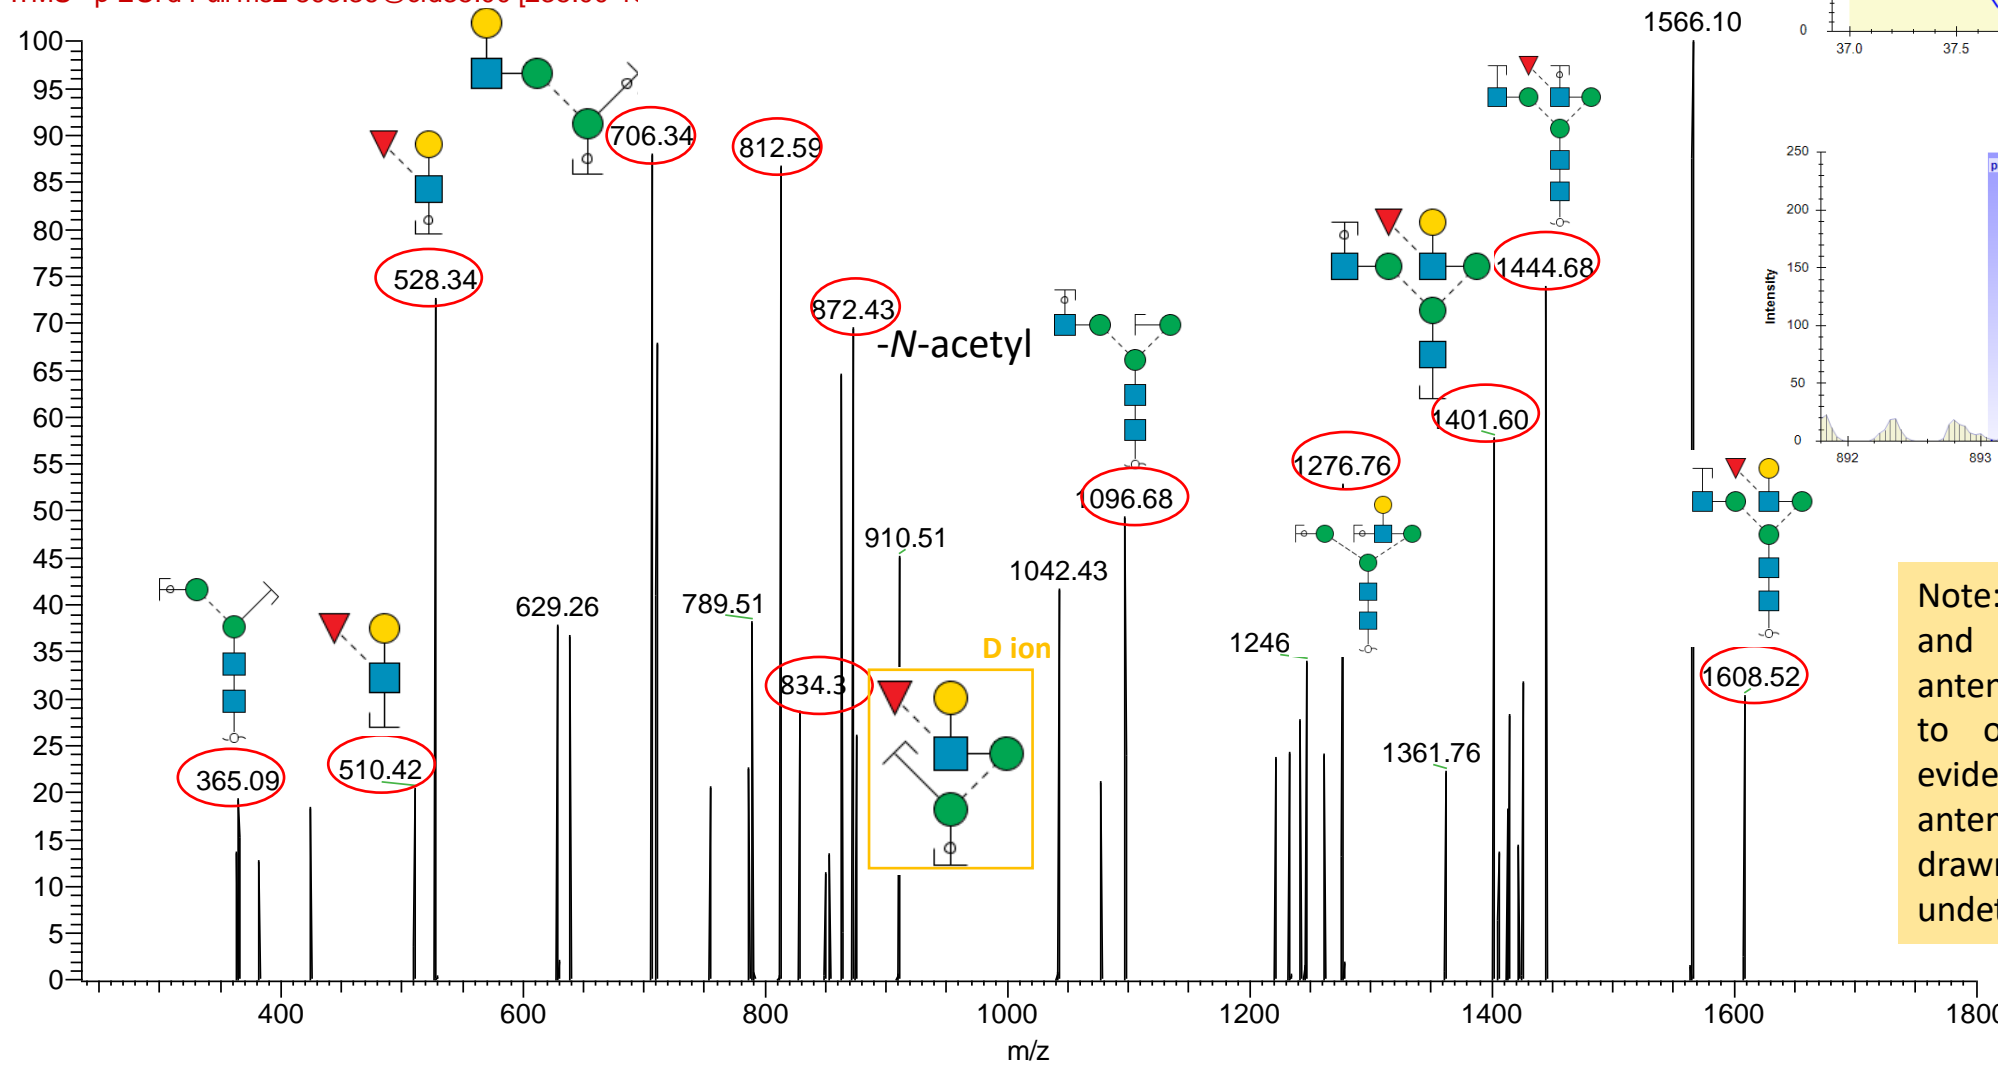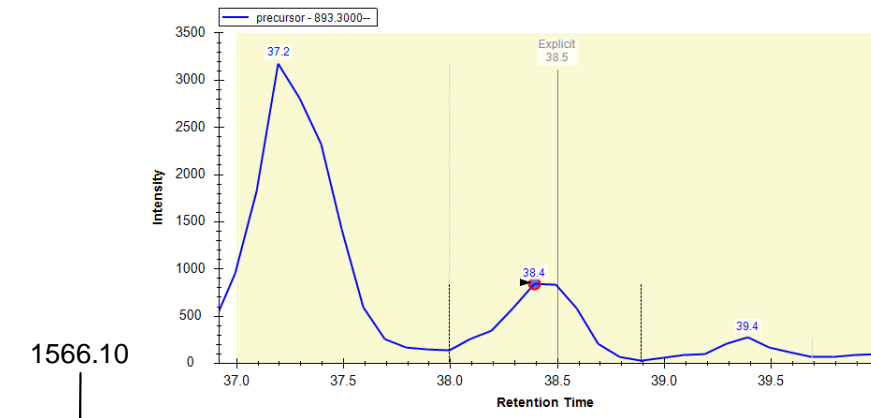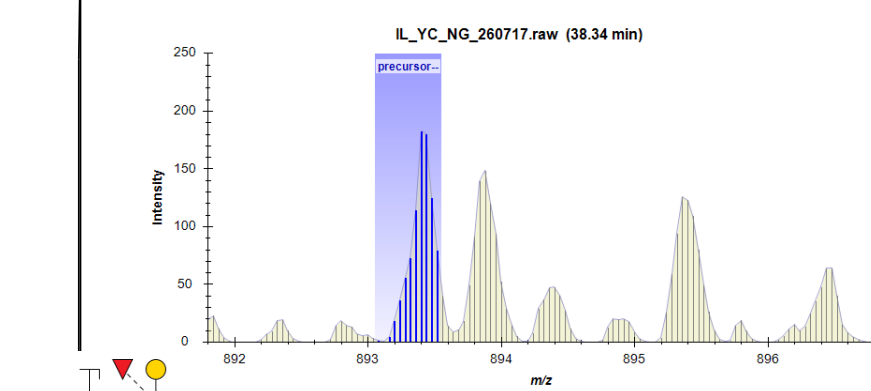

Note: From biosynthetic pathway and presence of D and ions, antenna fucosylation is predicted to occupy the  $\alpha$ 1,6 arm. No evidence of core fucose. The exact antennary fucosyl linkage(s) (here drawn as alpha1,3) remains undetermined.

# Glycan #27b

Complex

Hex<sub>2</sub>HexNAc<sub>2</sub> + Hex<sub>3</sub>HexNAc<sub>2</sub>Fuc<sub>1</sub>

*m/z*: 893.3 (2-)

IL\_YC\_NG\_260717 #4722 RT: 47.43 AV: 1 NL: 3.52E1

F: ITMS - p ESI d Full ms2 893.36@cid35.00 [235.00-1}

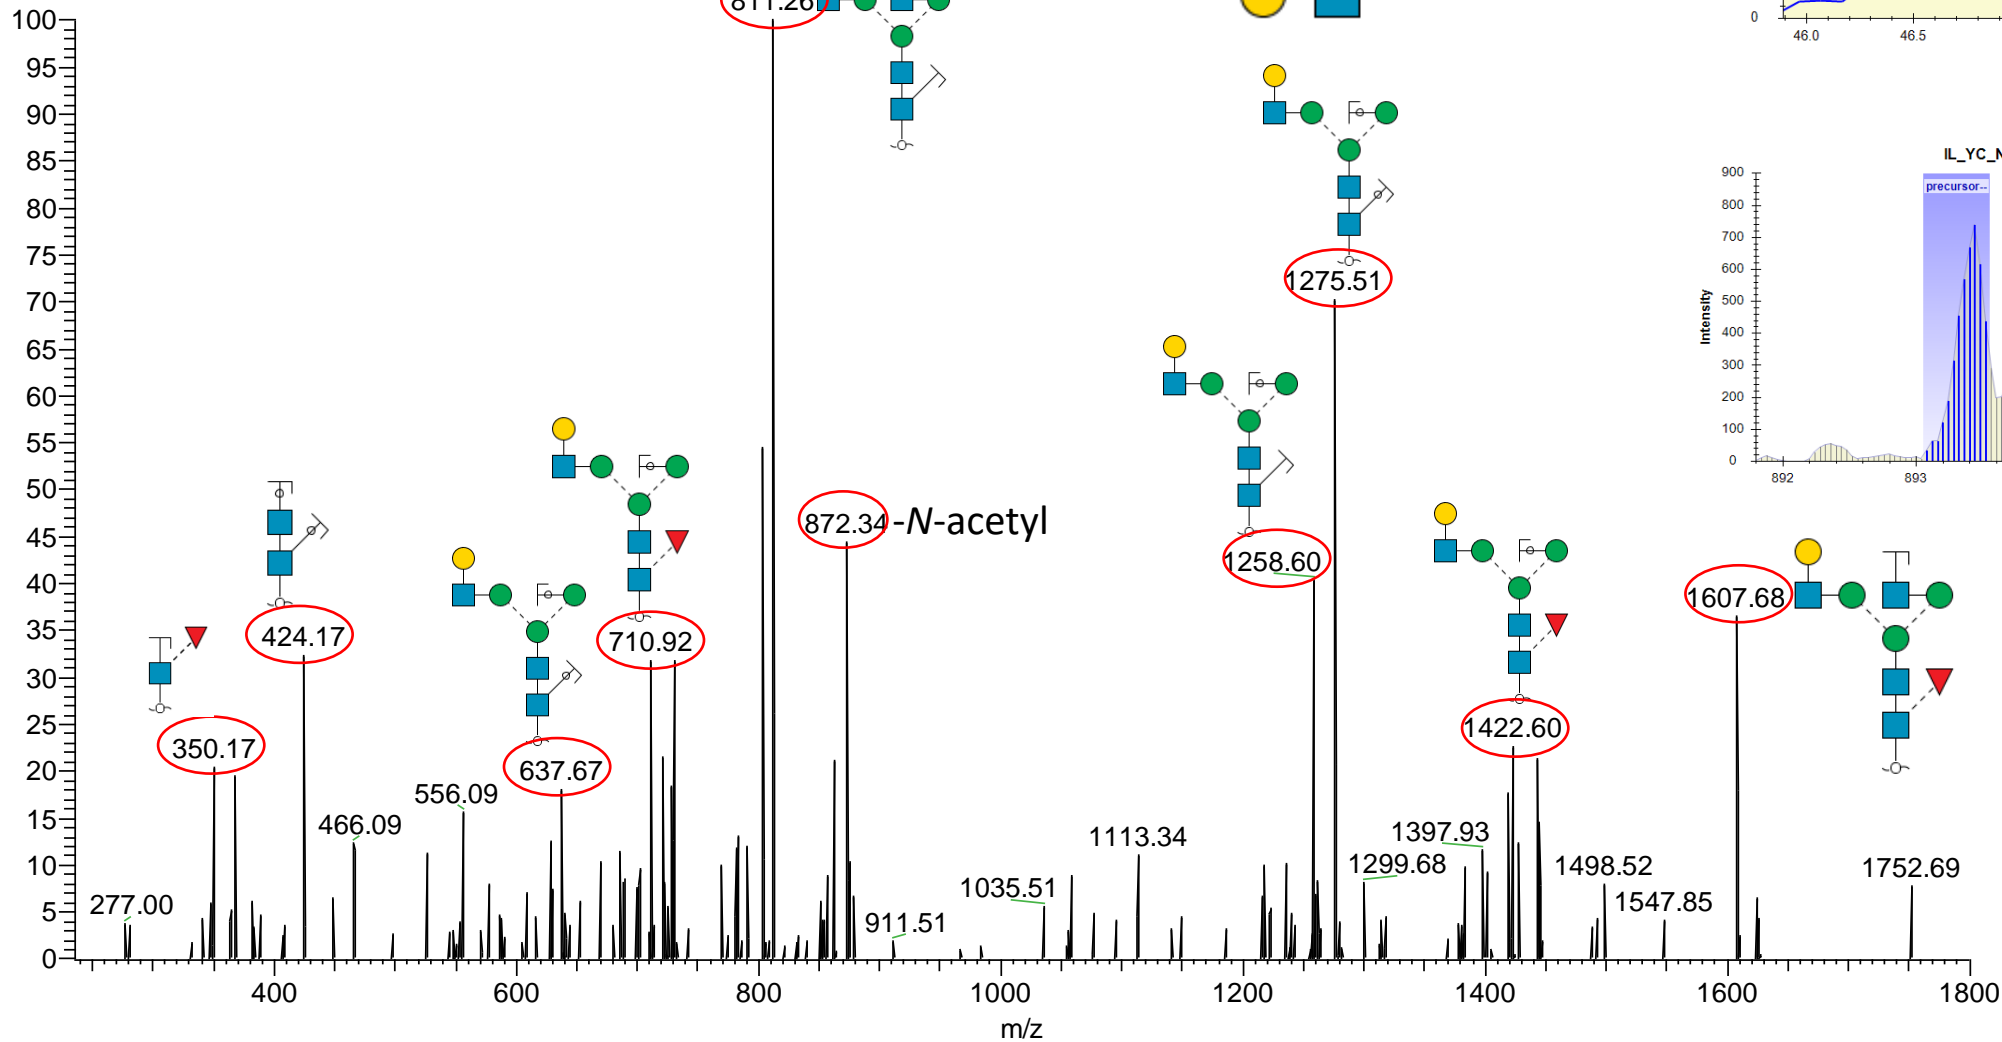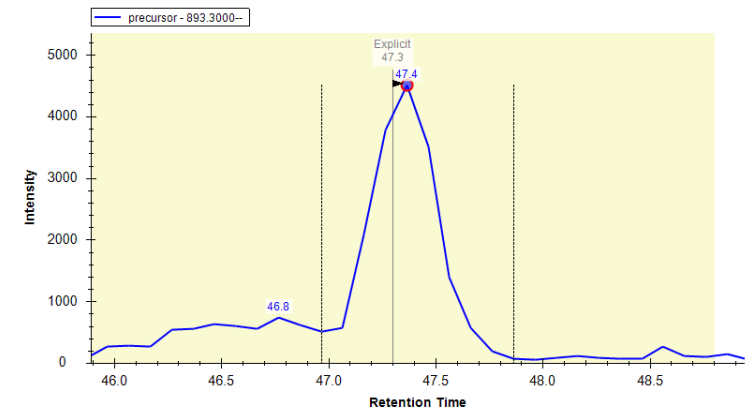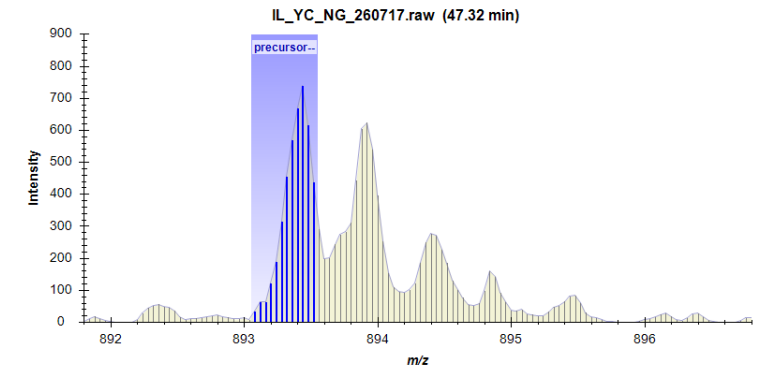

Note: Evidence of core fucose and no indication of antenna fucose



# Glycan #28

Complex (hybrid, but classified under complex)

Hex<sub>3</sub>HexNAc<sub>1</sub>NeuAc<sub>1</sub>+ Hex<sub>3</sub>HexNAc<sub>2</sub>

*m/z*: 945.4<sup>(2-)</sup>

IL\_YC\_NG\_260717 #3487 RT: 34.81 AV: 1 NL: 3.53E1

F: ITMS - p ESI d Full ms2 945.41 @cid35.00 [250.00-1500.00]

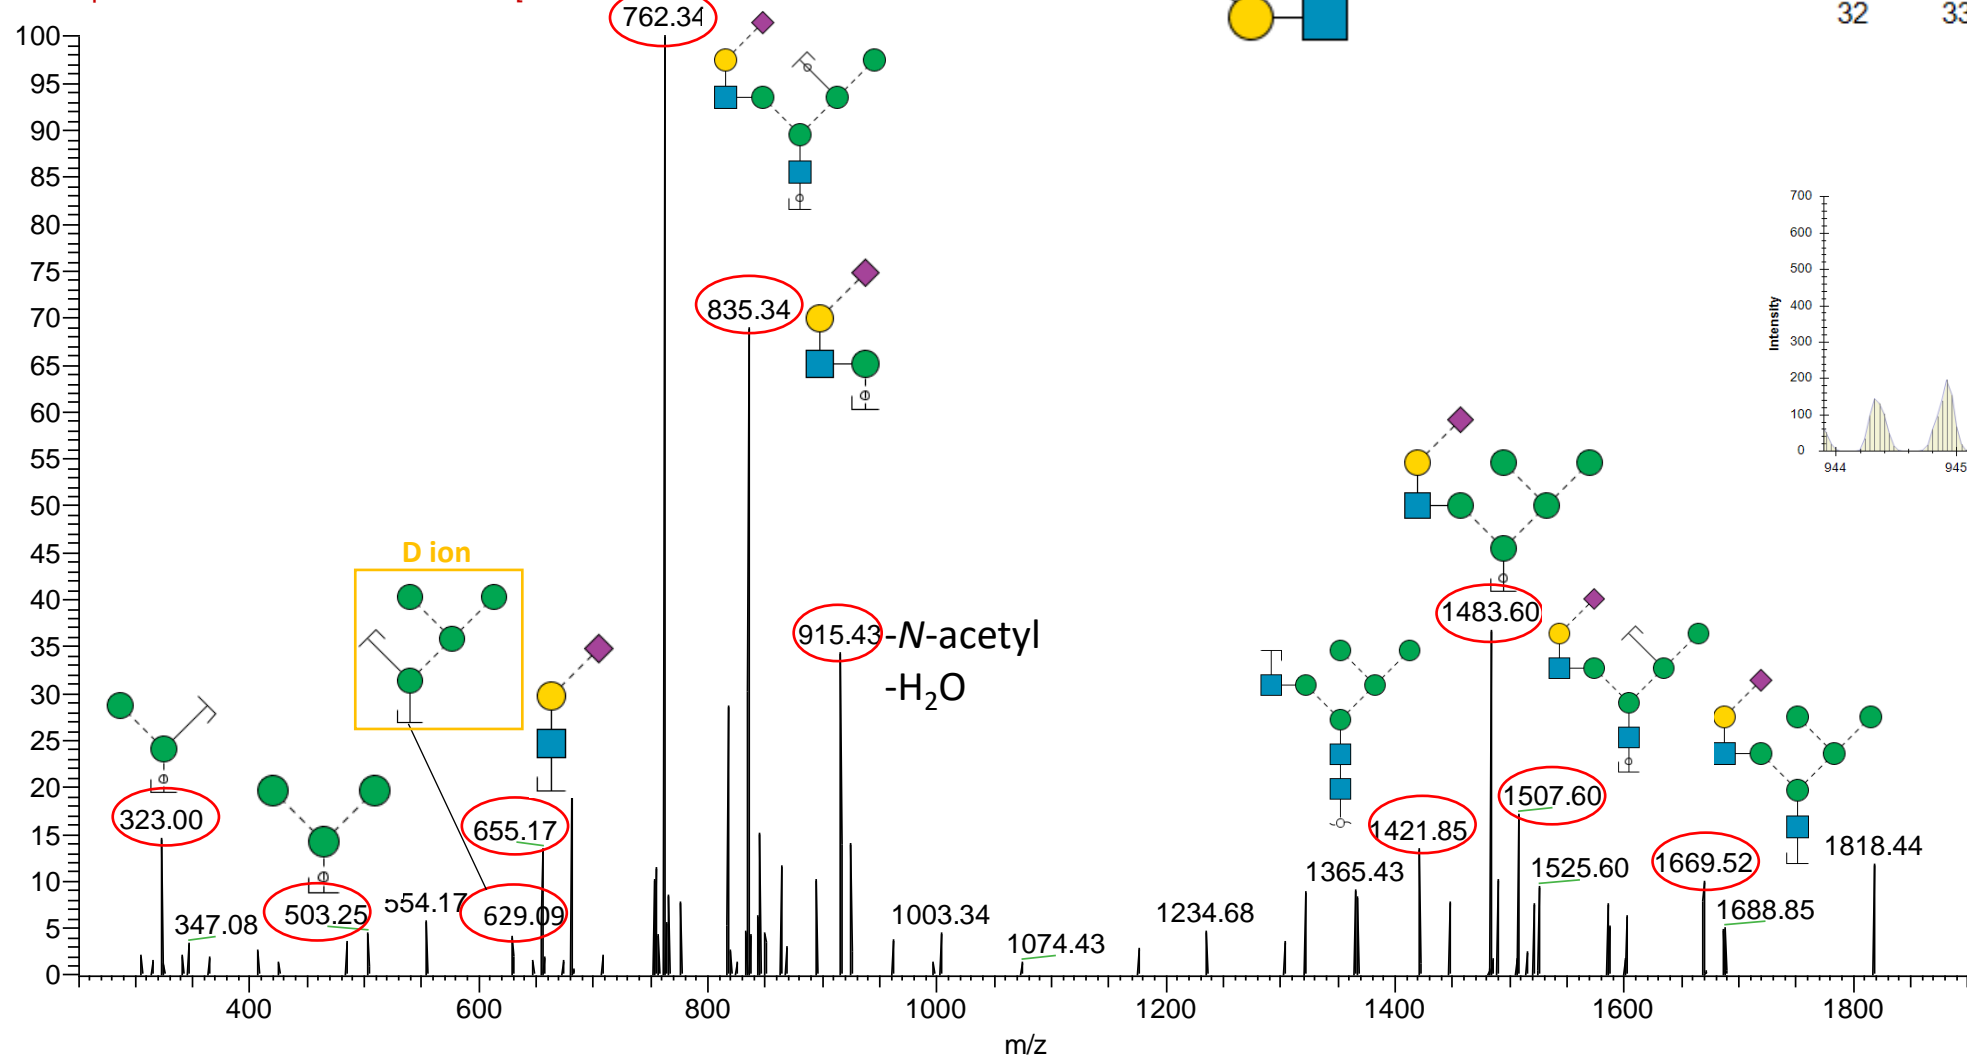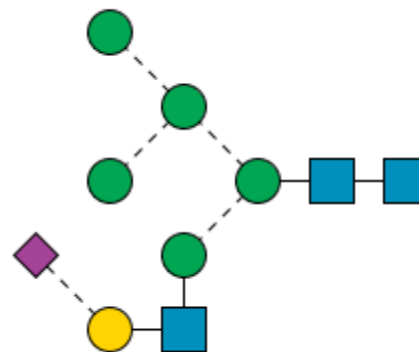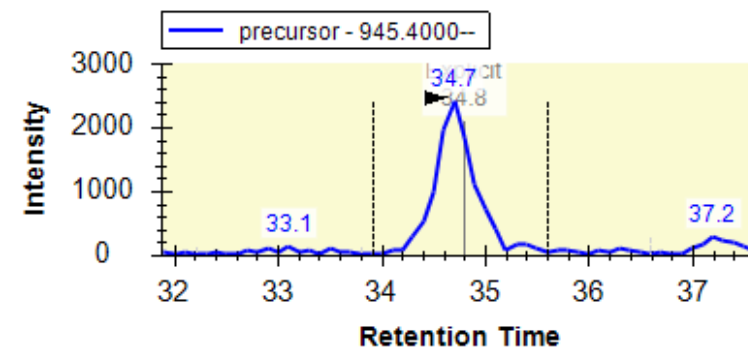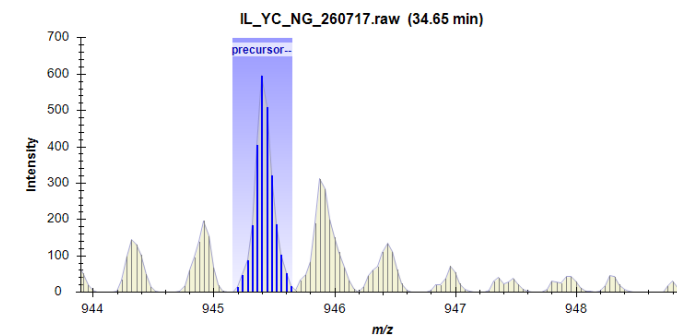

Note: From biosynthetic pathway and the D and/or D-18 ions, sialyl LacNAc is expected to occupy the  $\alpha$ 1,3 arm. Based on early PGC-LC elution, this glycan is annotated as the  $\alpha$ 2,6-sialyl linkage isomer.

# Glycan #29a

## Complex

Hex<sub>1</sub>HexNAc<sub>2</sub>NeuAc<sub>1</sub> + Hex<sub>3</sub>HexNAc<sub>2</sub>Fuc<sub>1</sub>

*m/z*: 957.9 (2-)

IL\_YC\_NG\_260717#4079 RT: 40.84 AV: 1 NL: 3.24E1  
F: ITMS - p ESI d Full ms2 957.89@cid35.00 [250.00-1930.00]

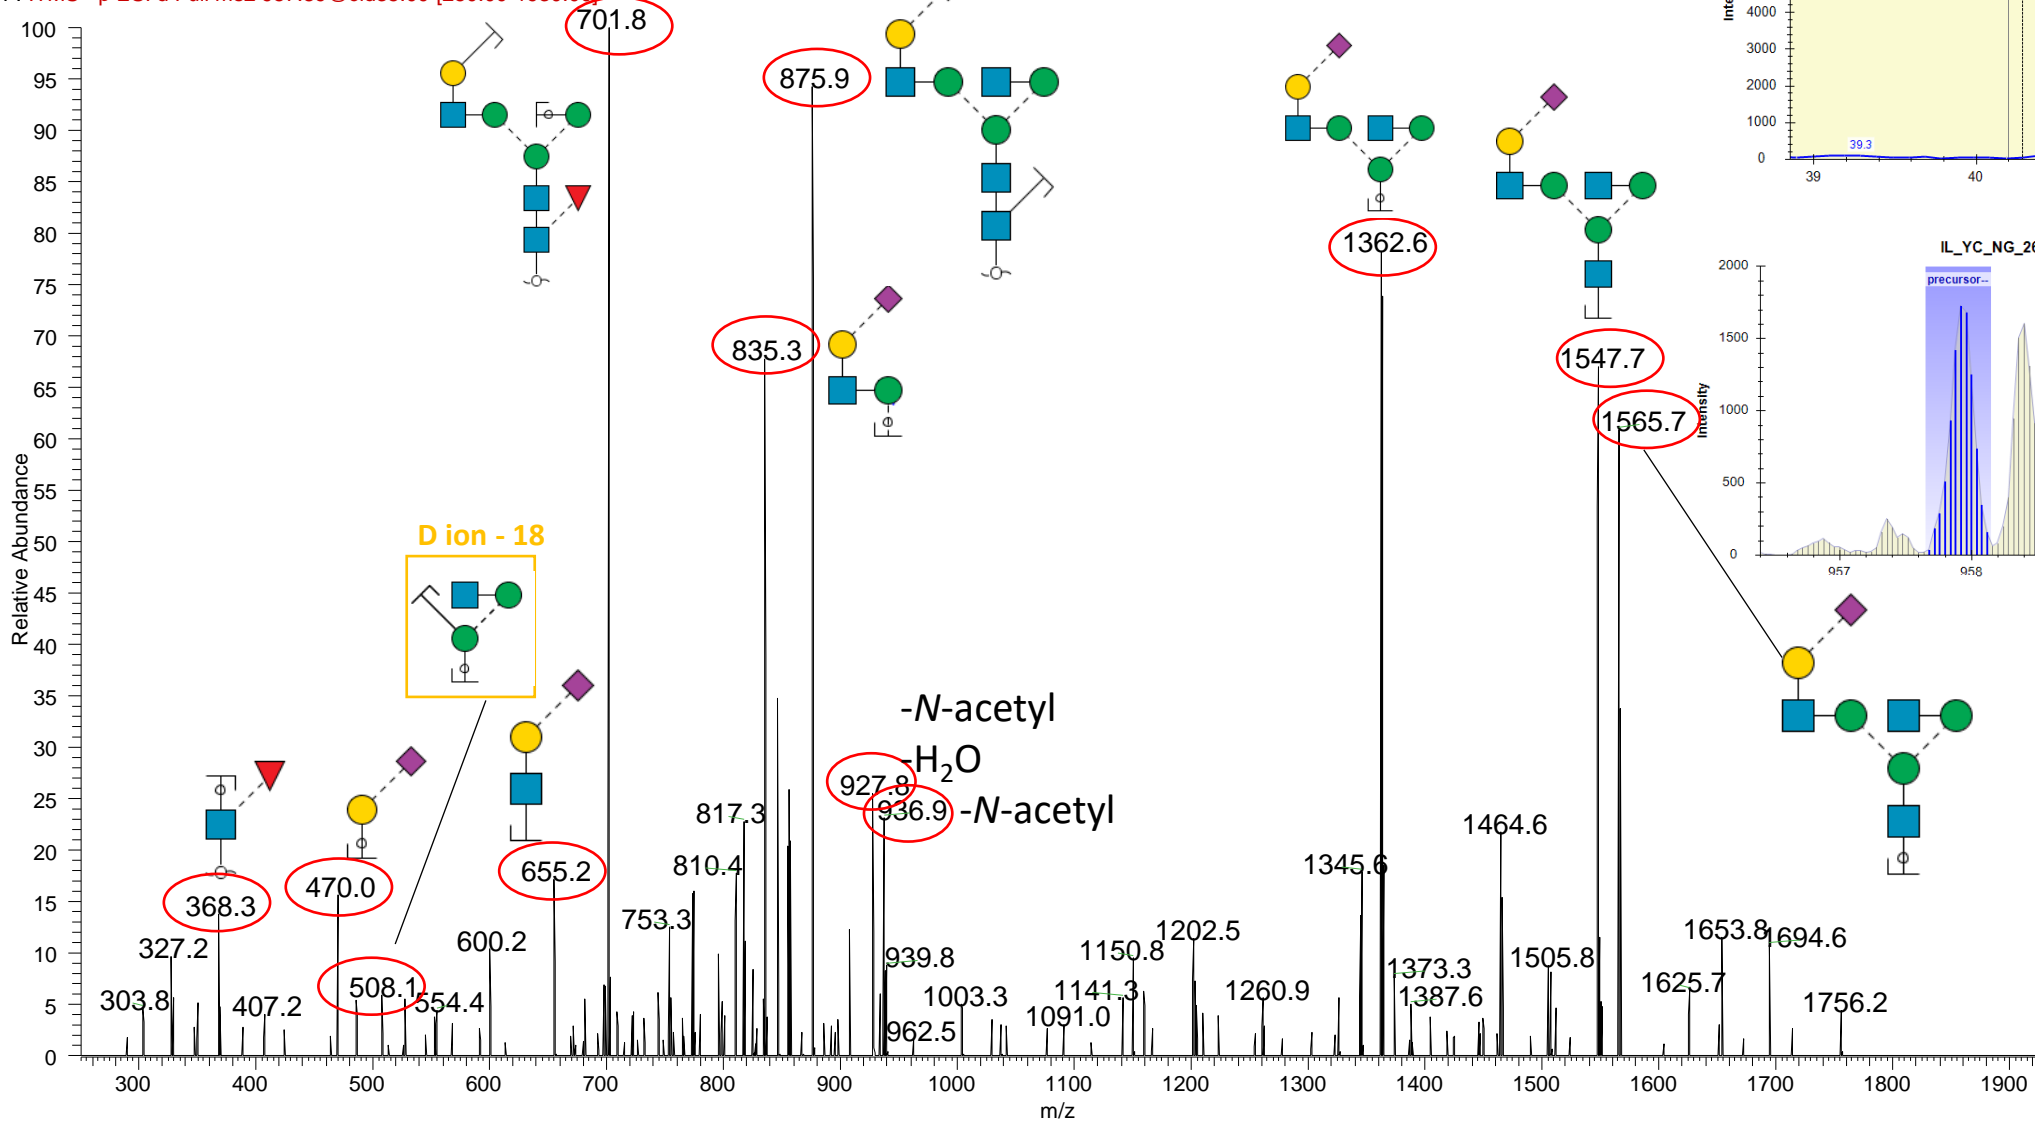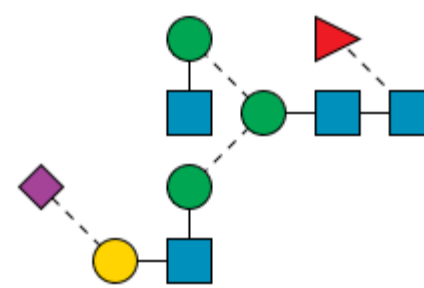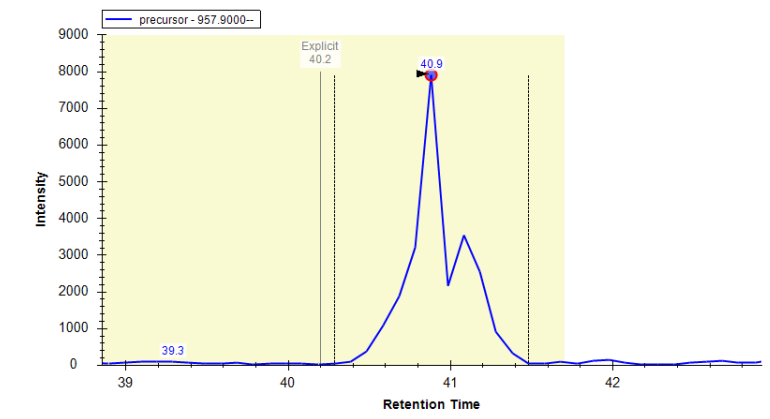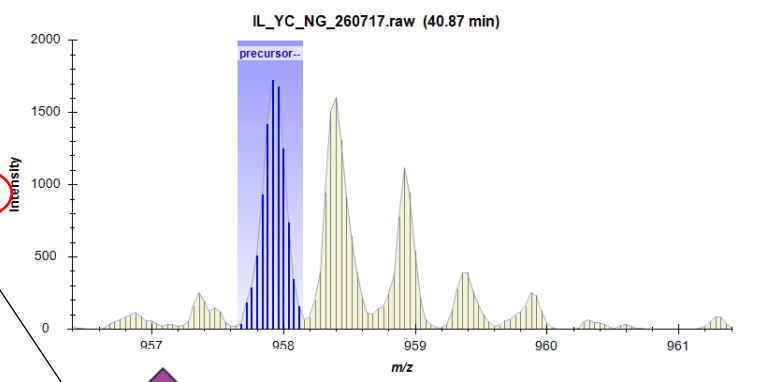

Note: From biosynthetic pathway and the D and/or D-18 ions, the sialyl LacNAc is expected to occupy the  $\alpha$ 1,3 arm. Evidence of core fucose. Based on early PGC-LC elution, this glycan is annotated as the  $\alpha$ 2,6-sialyl linkage isomer.

# Glycan #29b

## Complex

Hex<sub>1</sub>HexNAc<sub>2</sub>NeuAc<sub>1</sub> + Hex<sub>3</sub>HexNAc<sub>2</sub>Fuc<sub>1</sub>

*m/z*: 957.9<sup>(2-)</sup>

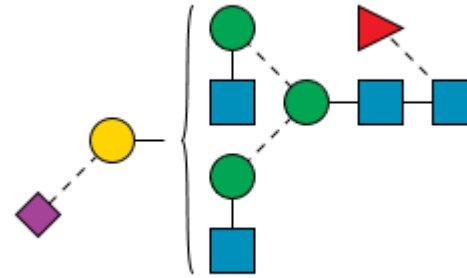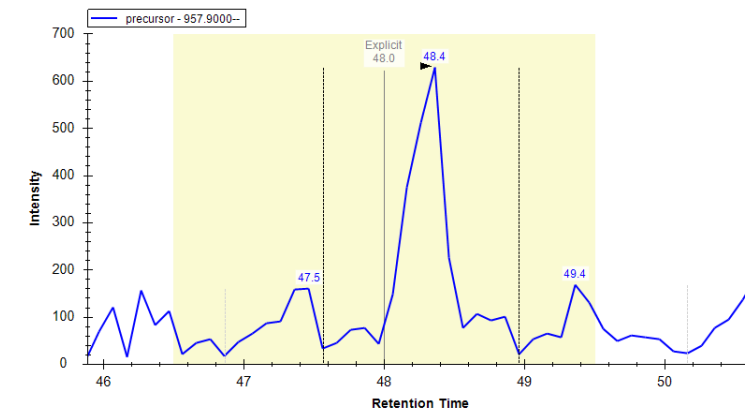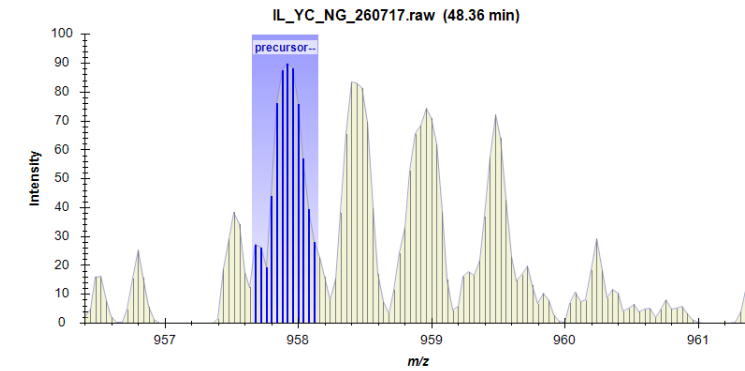

No MS/MS available in glycomics data

Note: There is a lack of tandem mass spectral data to evidence the glycan structure. However, based on late PGC-LC elution and the expected biosynthetic relationships between observed structures, this glycan is annotated as the  $\alpha$ 2,3-sialyl linkage isomer of glycan #29a.

# Glycan #30

Complex

Hex<sub>2</sub>HexNAc<sub>2</sub>NeuAc<sub>1</sub> + Hex<sub>3</sub>HexNAc<sub>2</sub>

*m/z*: 965.9 (2-)

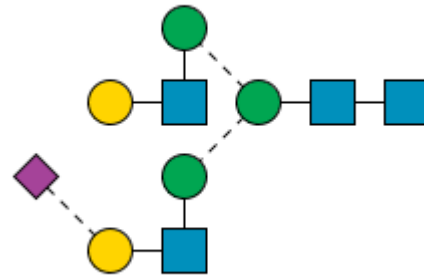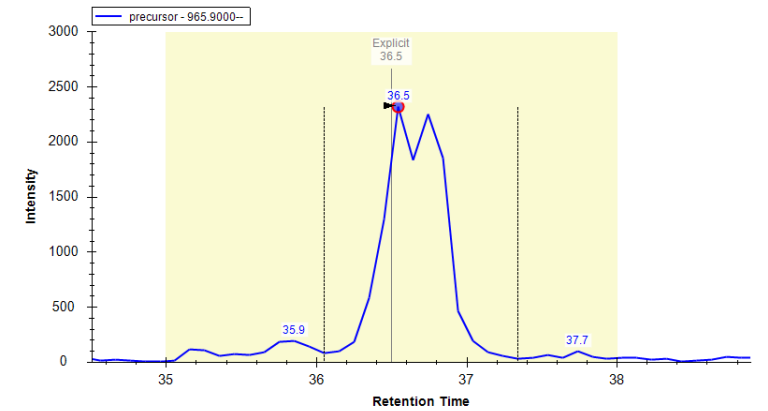

IL\_VB\_NG\_260717 #3648 RT: 36.51 AV: 1 NL: 1.29E2  
F: ITMS - p ESI d Full ms2 965.90@cid35.00 [255.00-14

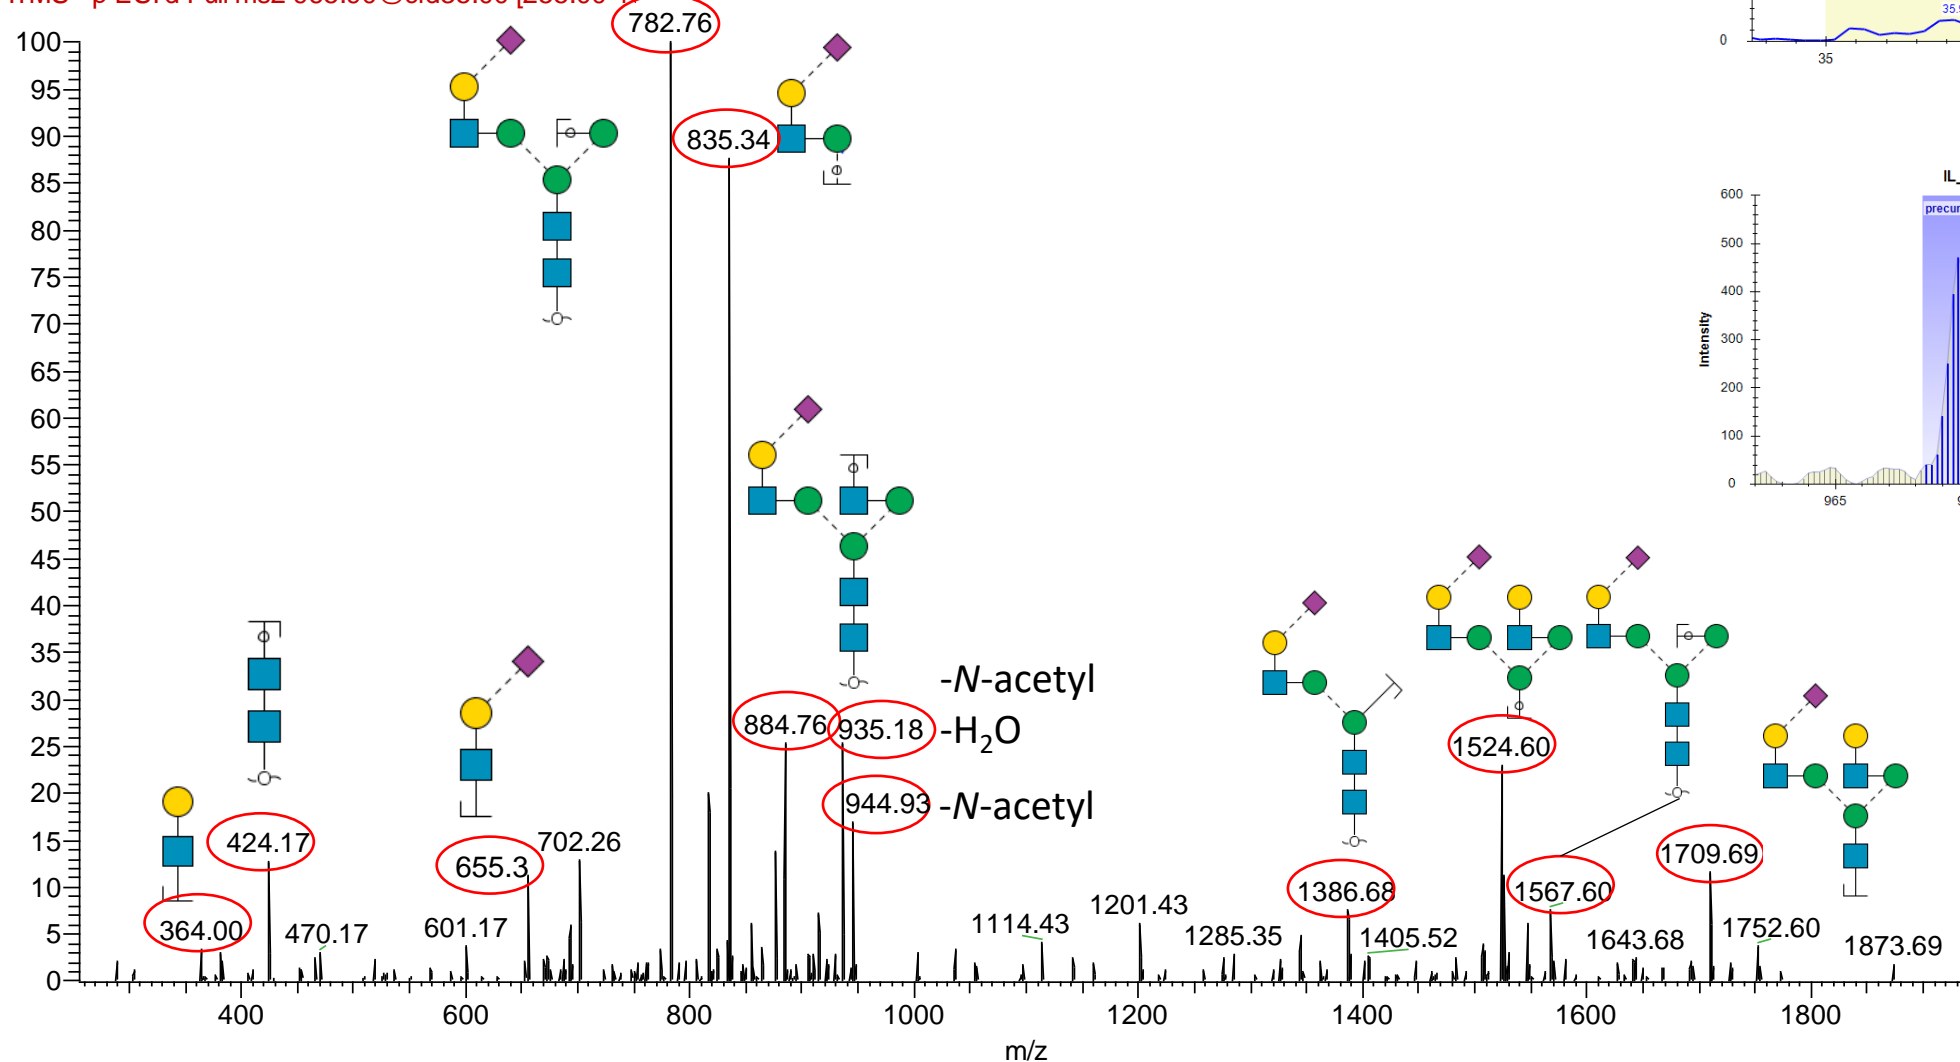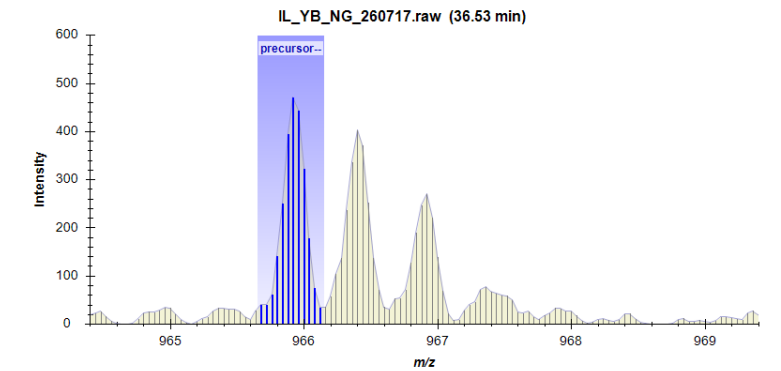

Note: From biosynthetic pathway and the lack of D and/or D-18 ions, the sialyl LacNAc is predicted to occupy the  $\alpha$ 1,3 arm. Based on early PGC-LC elution, this glycan is annotated as the  $\alpha$ 2,6-sialyl linkage isomer.

# Glycan #31a

Complex

Hex<sub>2</sub>HexNAc<sub>2</sub>Fuc<sub>1</sub> + Hex<sub>3</sub>HexNAc<sub>2</sub>Fuc<sub>1</sub>

*m/z*: 966.4<sup>(2-)</sup>

IL\_XB\_NG\_260717 #4362 RT: 43.81 AV: 1 NL: 6.91E1  
F: ITMS - p ESI d Full ms2 966.40@cid35.00 [255.00-1!

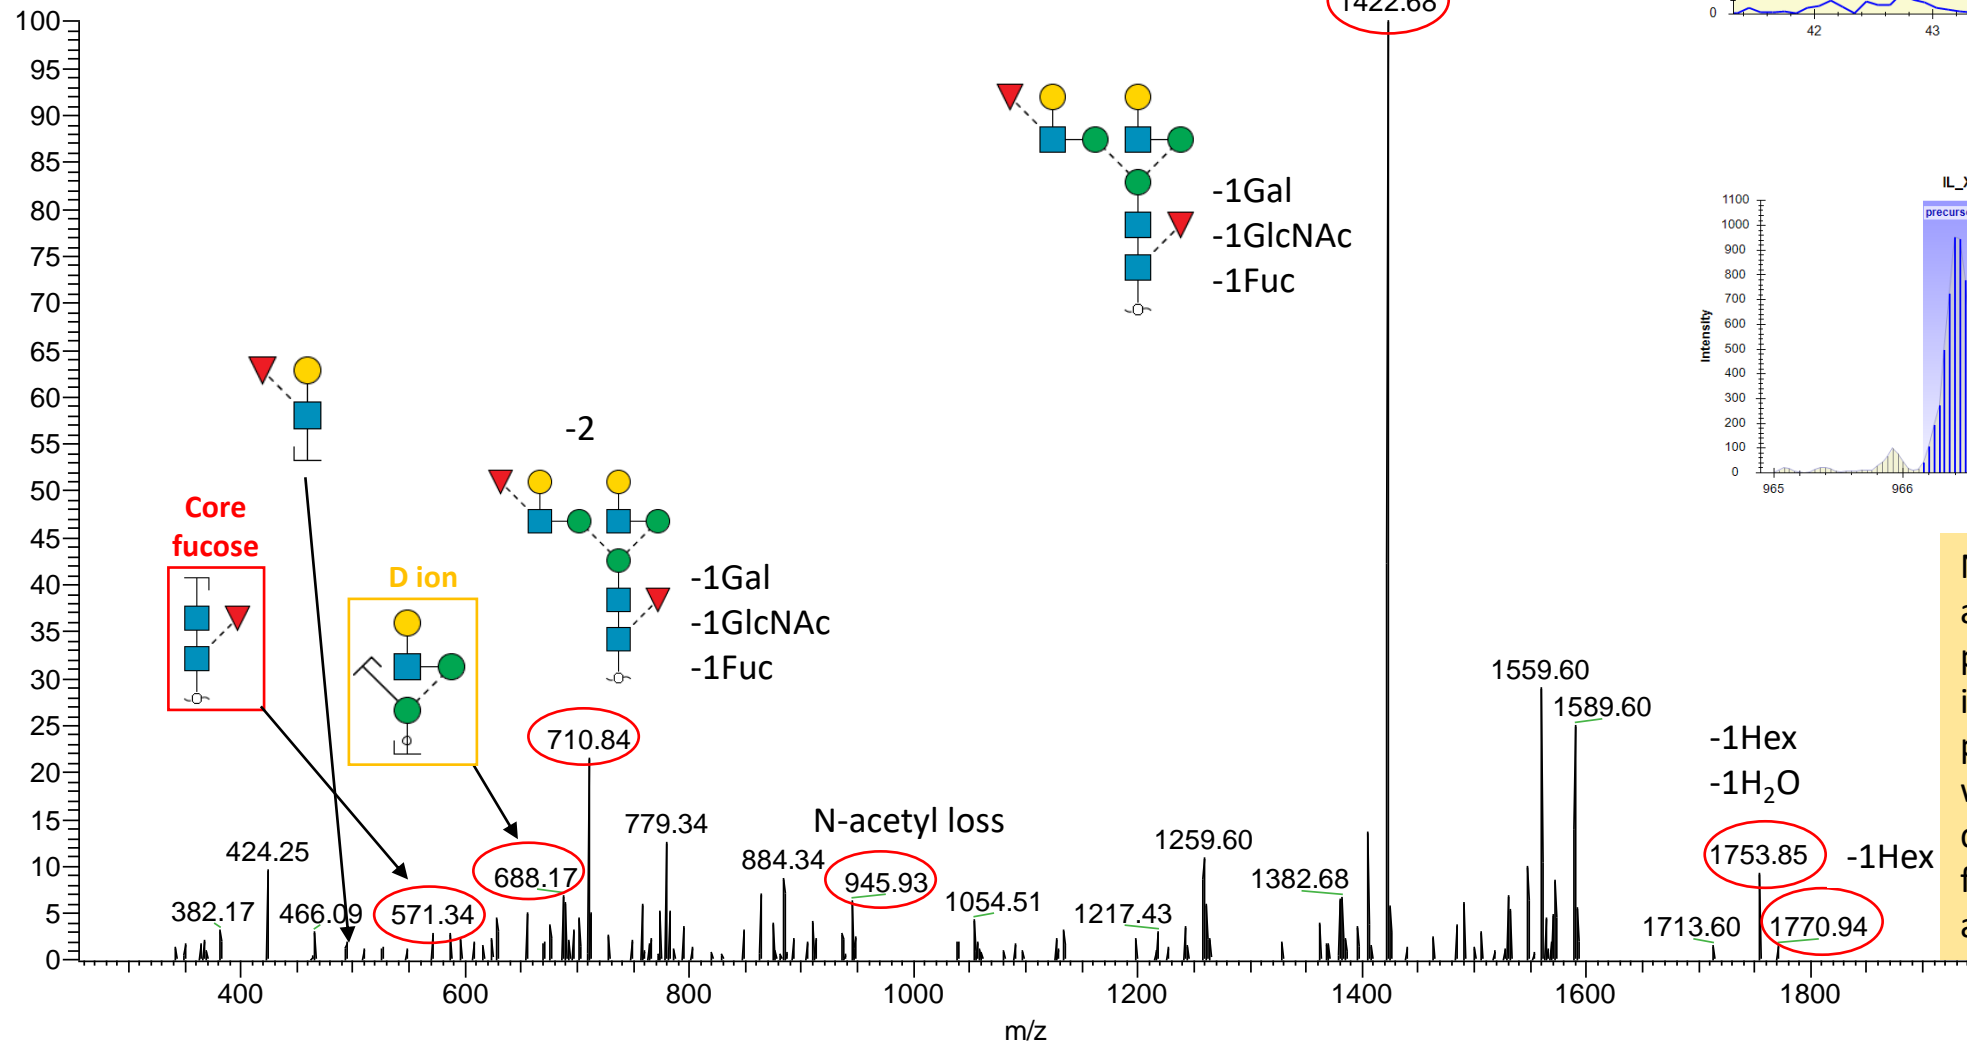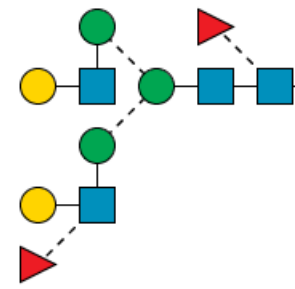

1422.68

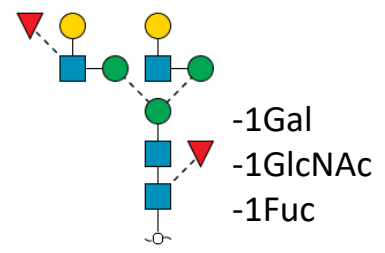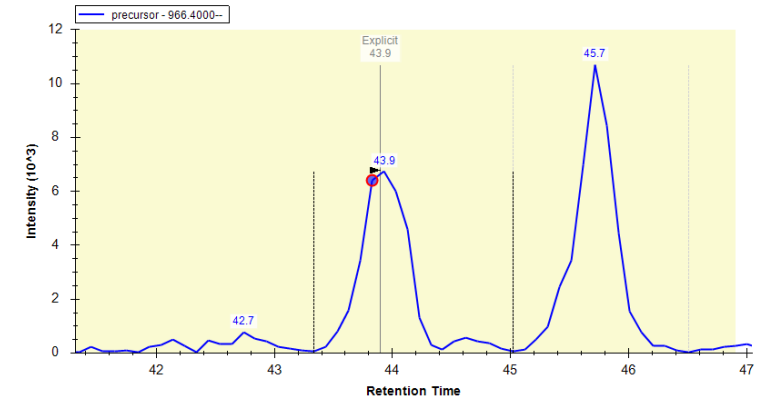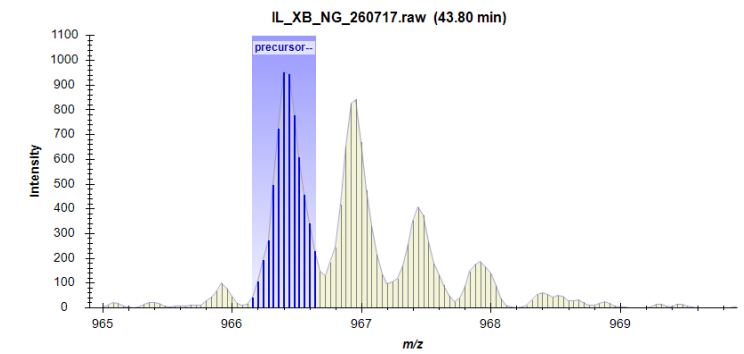

Note: Indication of both core and antenna fucose. From biosynthetic pathway and the D and/or D-18 ions, the unmodified LacNAc is predicted to occupy the  $\alpha$ 1,6 arm with the Lewis x/a to occupy the  $\alpha$ 1,3 arm. The exact antennary fucosyl linkage(s) (here drawn as  $\alpha$ 1,3) remains undetermined.

# Glycan #31b

Complex

Hex<sub>2</sub>HexNAc<sub>2</sub>Fuc<sub>1</sub> + Hex<sub>3</sub>HexNAc<sub>2</sub>Fuc<sub>1</sub>

*m/z*: 966.4<sup>(2-)</sup>

IL\_XB\_NG\_260717 #4543 RT: 45.69 AV: 1 NL: 5.53E1  
F: ITMS - p ESI d Full ms2 966.40@cid35.00 [255.00-1!

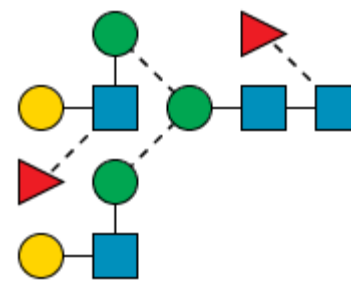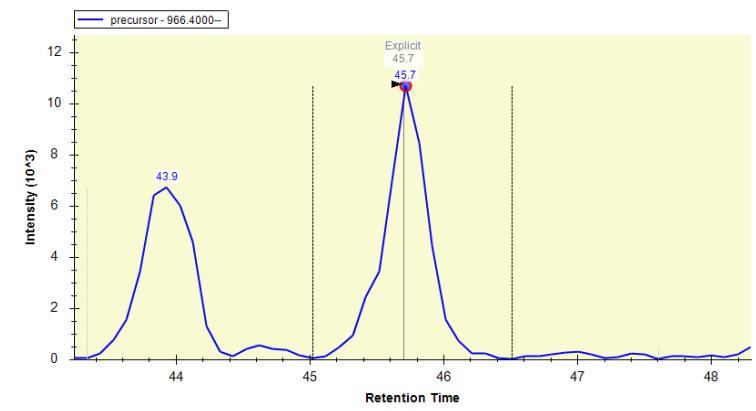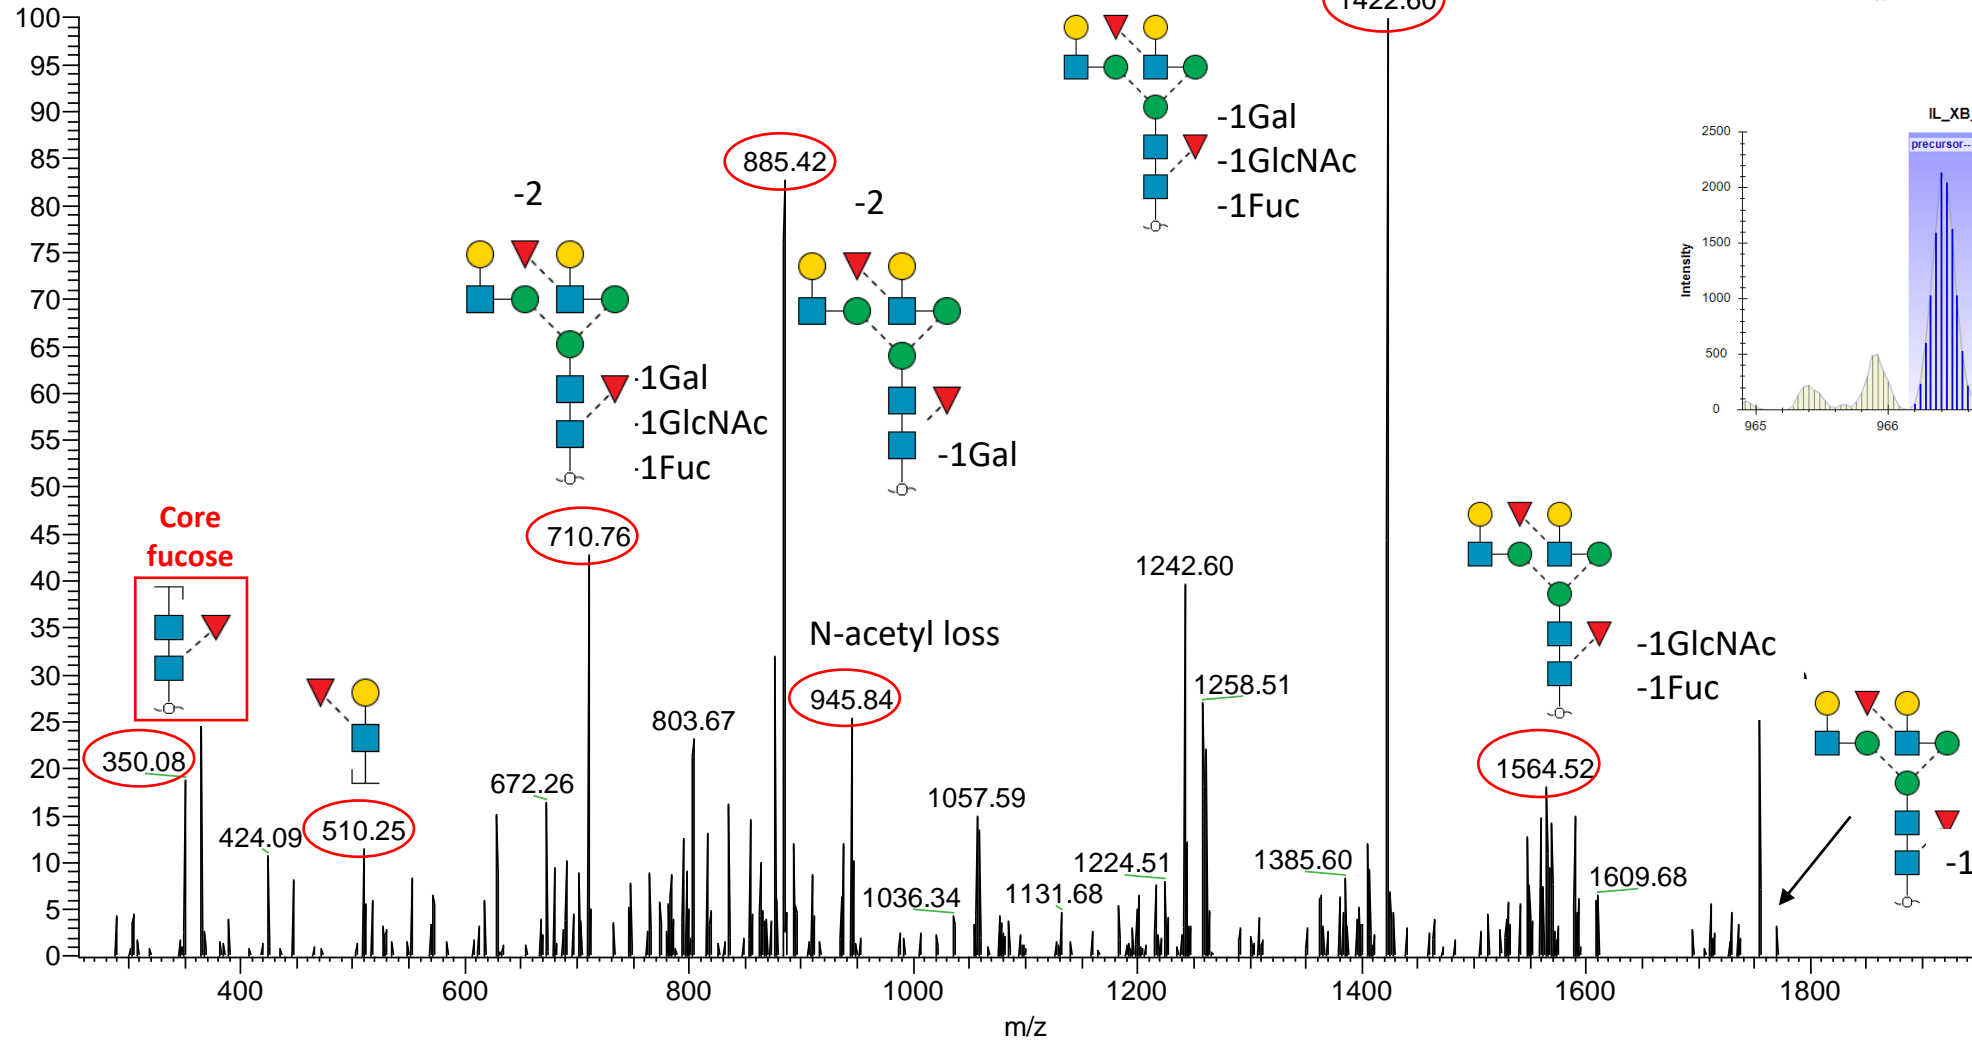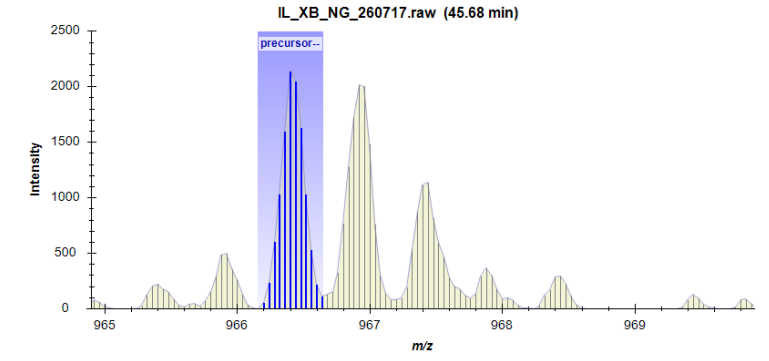

Note: Indication of both core and antenna fucose. The exact antennary fucosyl linkage(s) (here drawn as alpha1,3) remains undetermined.

# Glycan #32a

Complex

Hex<sub>2</sub>HexNAc<sub>2</sub>Fuc<sub>1</sub>NeuAc<sub>1</sub> + Hex<sub>3</sub>HexNAc<sub>2</sub>

*m/z*: 1038.9<sup>(2-)</sup>

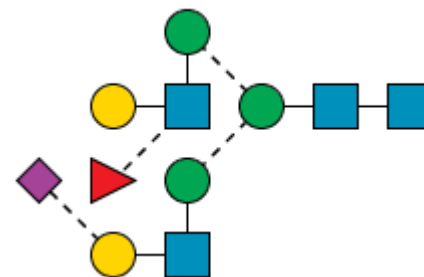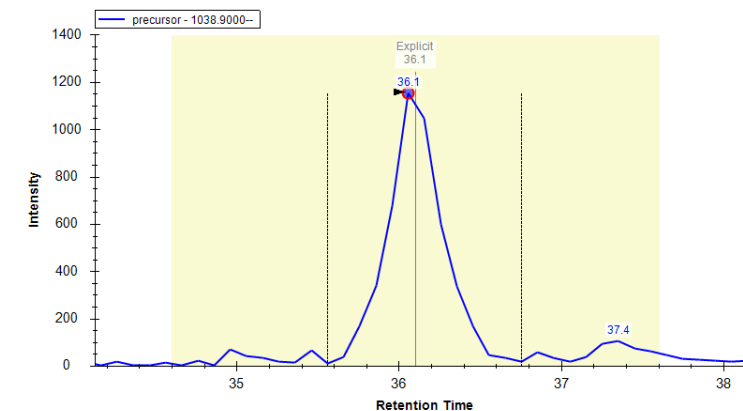

IL\_XD\_NG\_260717 #3630 RT: 36.18 AV: 1 NL: 1.40E1

F: ITMS - p ESI d Full ms2 1038.92@cid35.00 [275.00-;

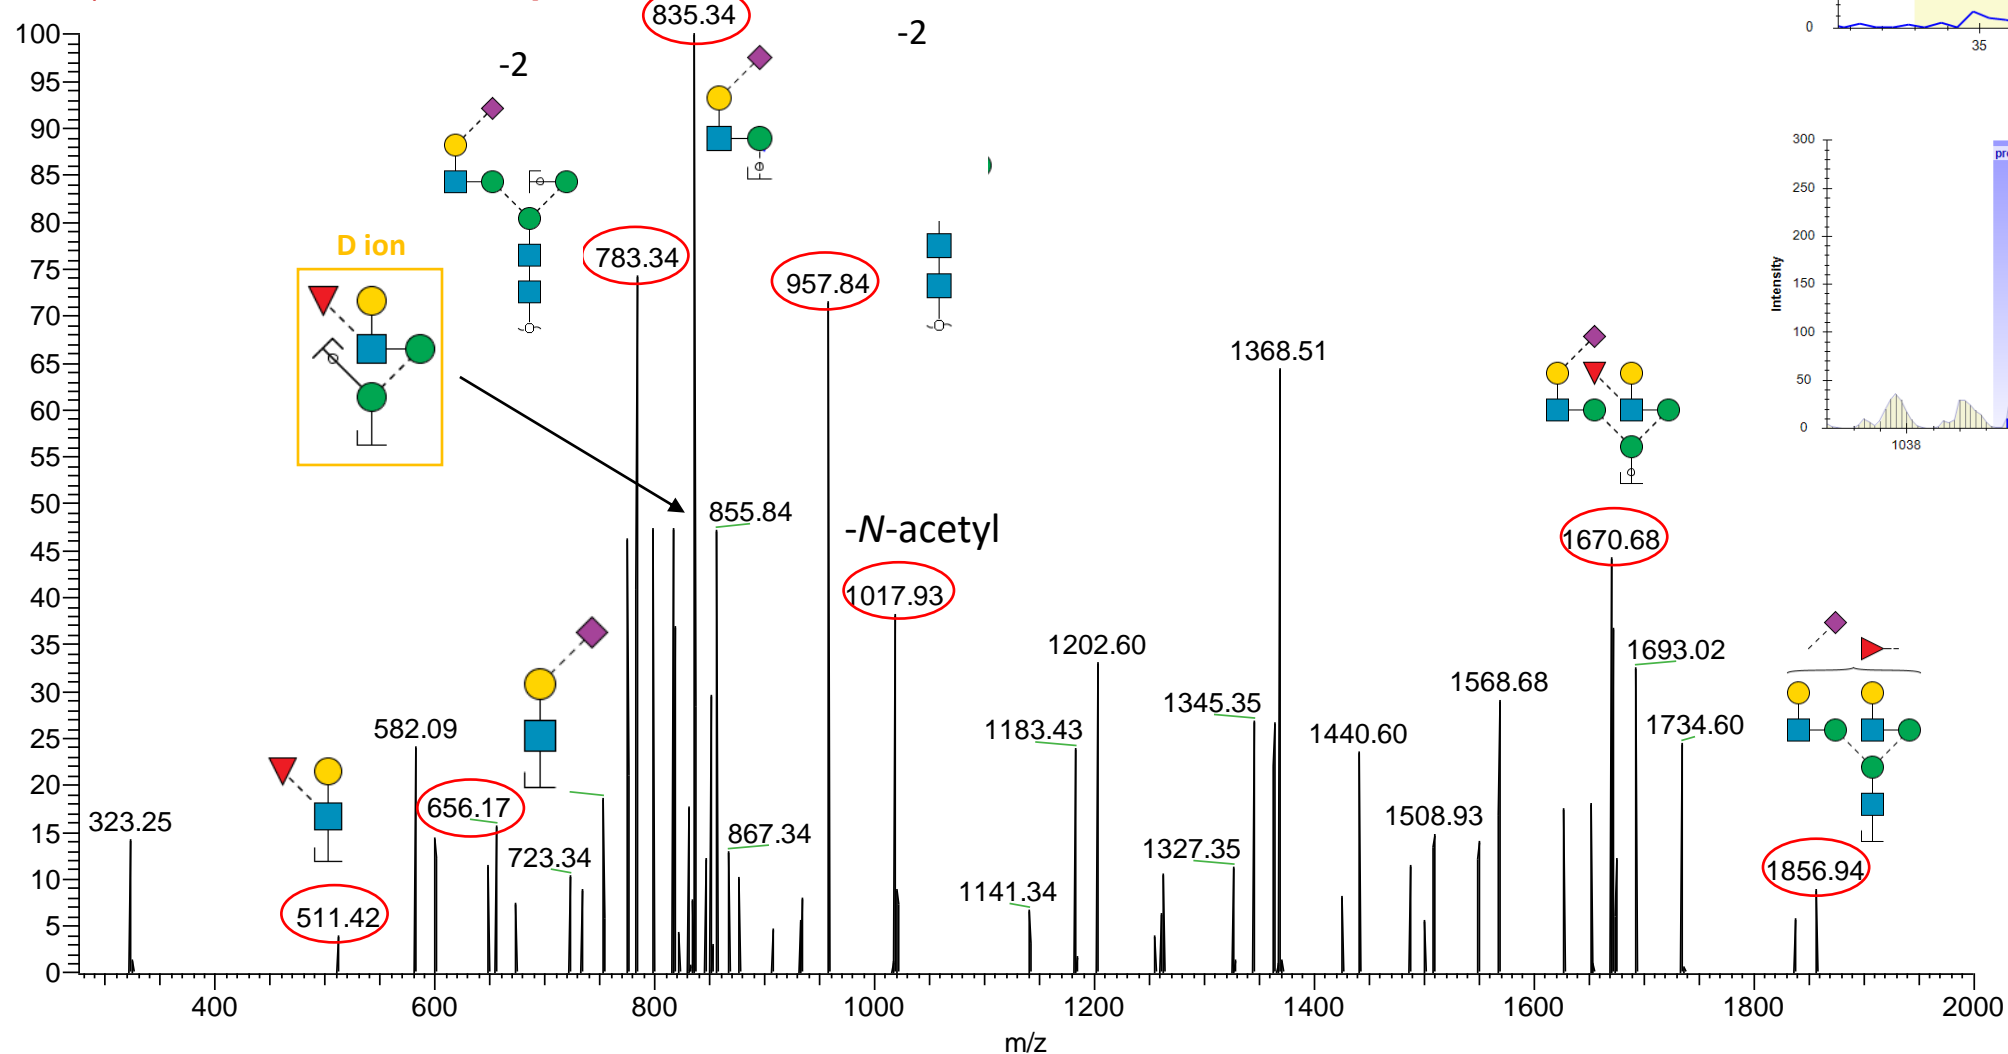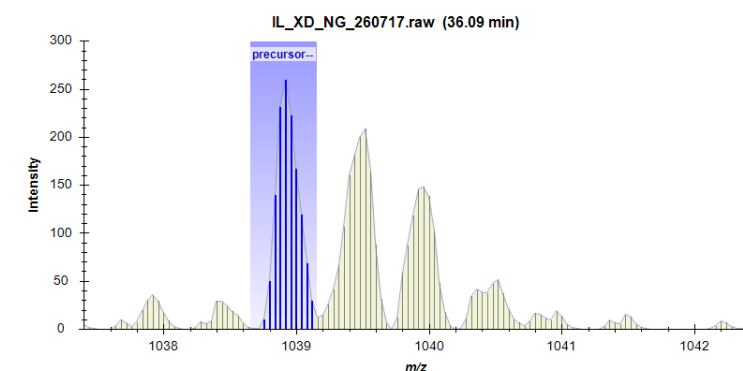

Note: Based on early PGC-LC elution, this glycan is annotated as the  $\alpha$ 2,6-sialyl linkage isomer. No indication of core fucose. The exact antennary fucosyl linkage(s) (here drawn as  $\alpha$ 1,3) remains undetermined.

# Glycan #32b

Complex

Hex<sub>2</sub>HexNAc<sub>2</sub>NeuAc<sub>1</sub> + Hex<sub>3</sub>HexNAc<sub>2</sub>Fuc<sub>1</sub>

*m/z*: 1038.9 (2-)

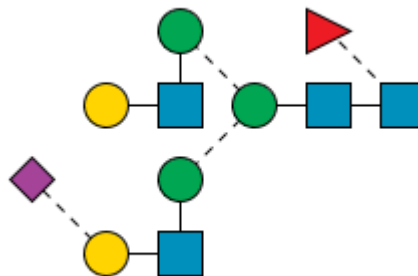

IL\_XD\_NG\_260717 #4382 RT: 43.73 AV: 1 NL: 4.21E1  
F: ITMS - p ESI d Full ms2 1038.92@cid35.00 [275.00-2000.00]

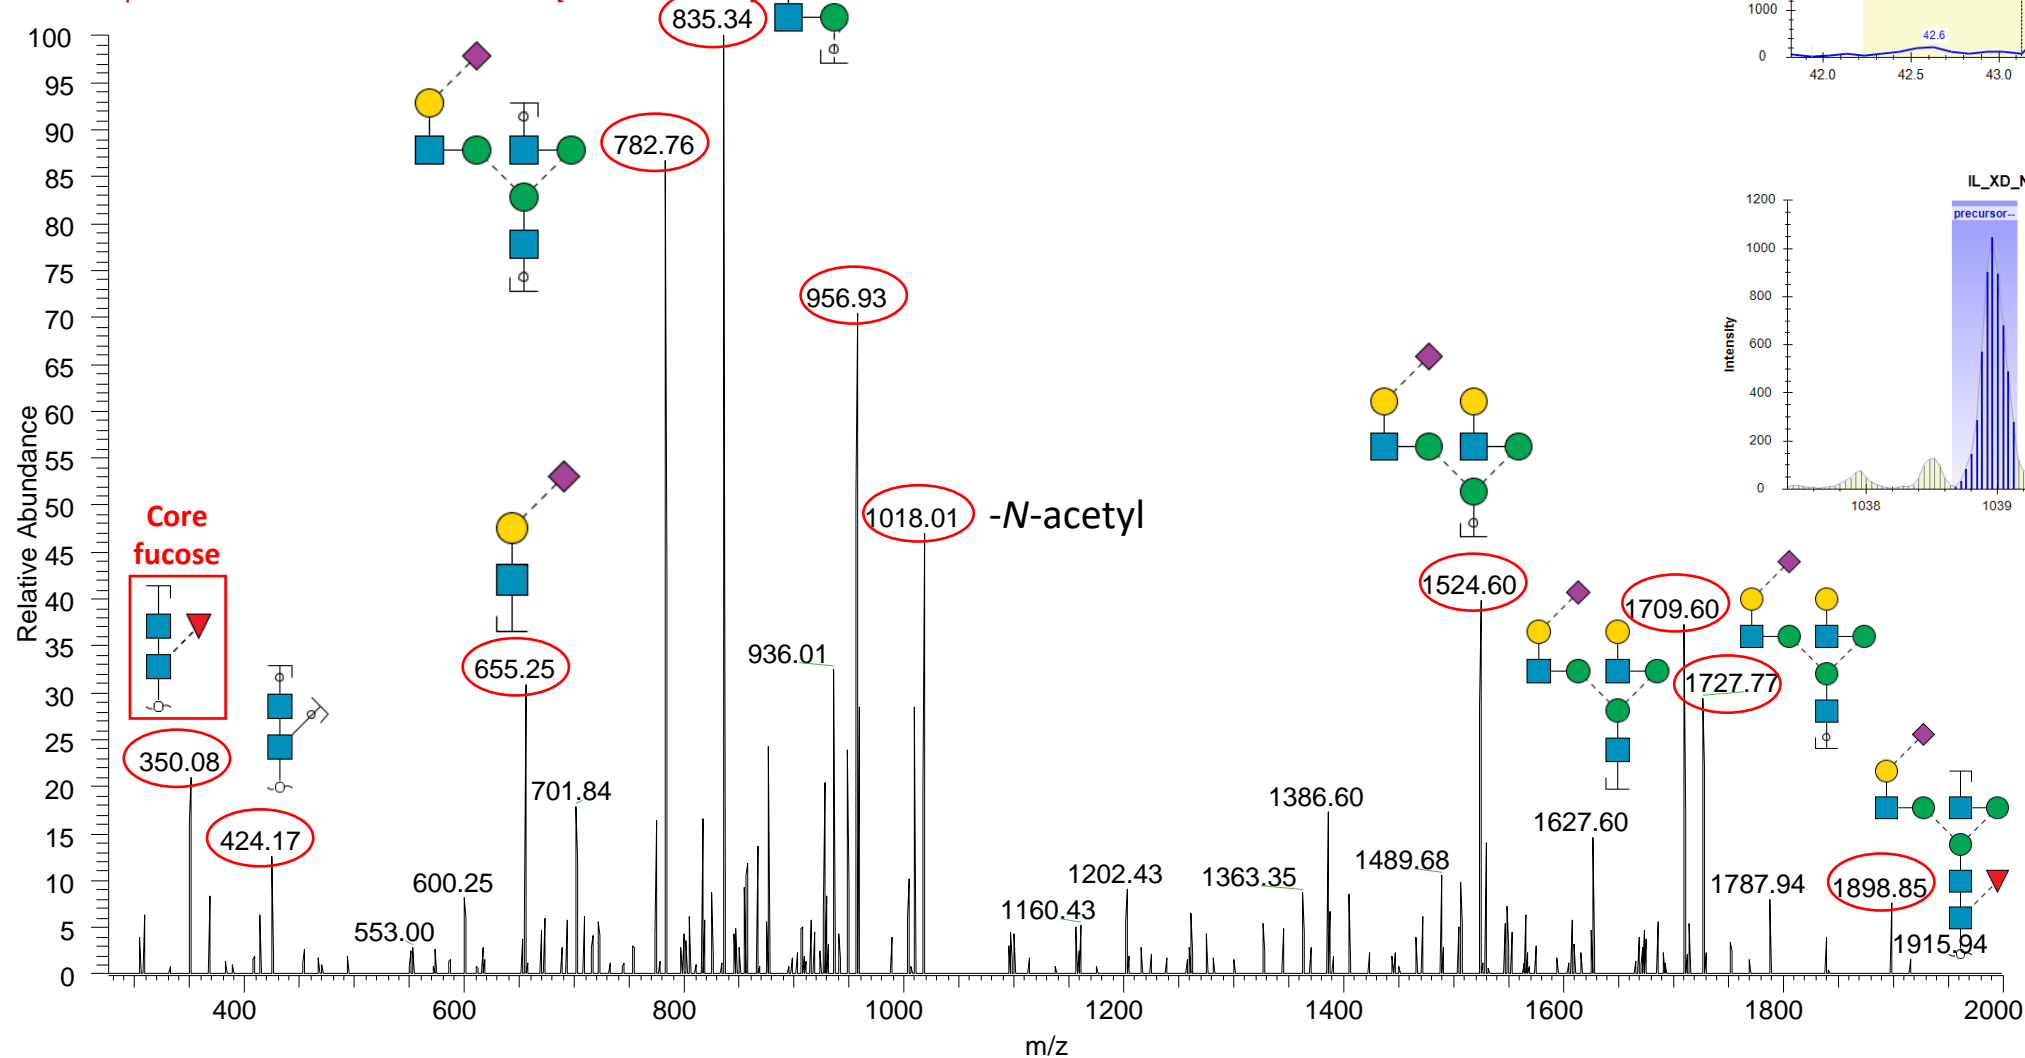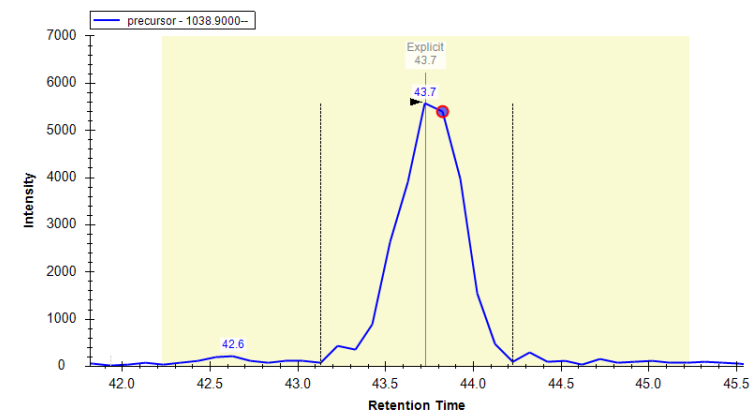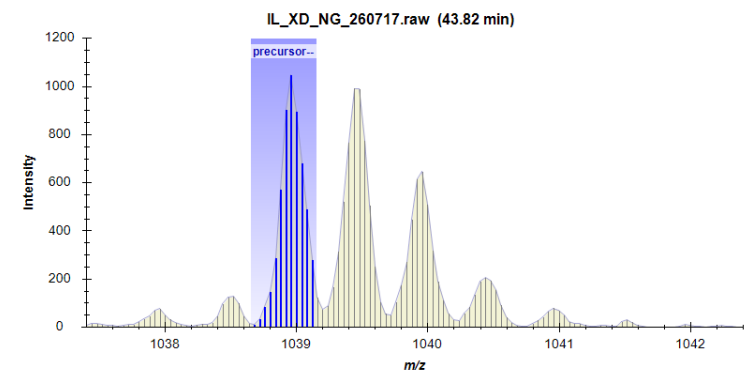

Note: From biosynthetic pathway and the lack of D and/or D-18 ions, the sialyl LacNAc is predicted to occupy the  $\alpha$ 1,3 arm. Evidence of core fucose. Based on early PGC-LC elution, this glycan is annotated as the  $\alpha$ 2,6-sialyl linkage isomer.



# Glycan #32c

## Complex

Hex<sub>2</sub>HexNAc<sub>2</sub>NeuAc<sub>1</sub> + Hex<sub>3</sub>HexNAc<sub>2</sub>Fuc<sub>1</sub>

*m/z*: 1038.9 (2-)

IL\_XD\_NG\_260717 #4955 RT: 49.51 AV: 1 NL: 1.82E1  
F: ITMS - p ESI d Full ms2 1038.92@cid35.00 [275.00-2000.00]

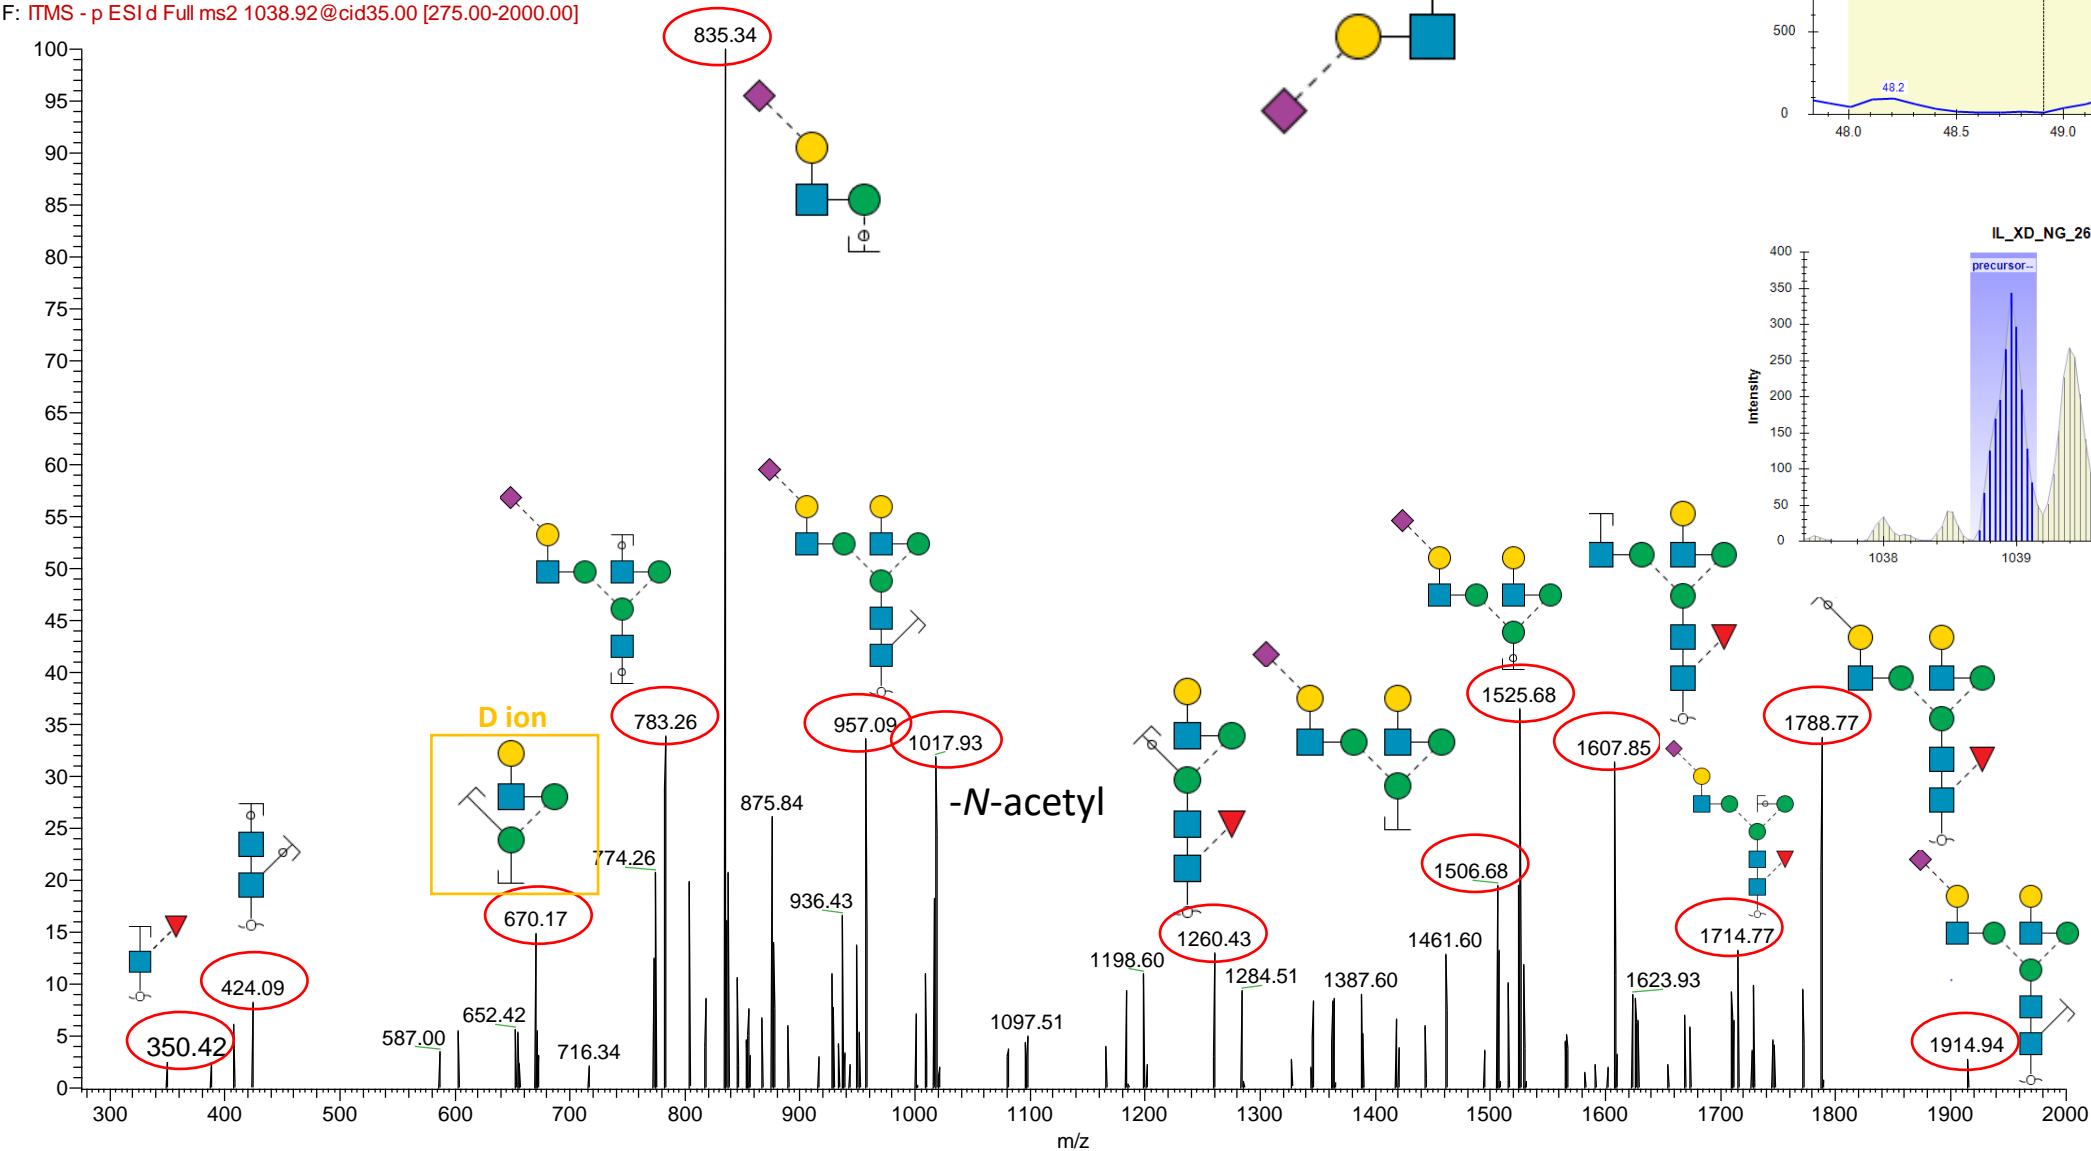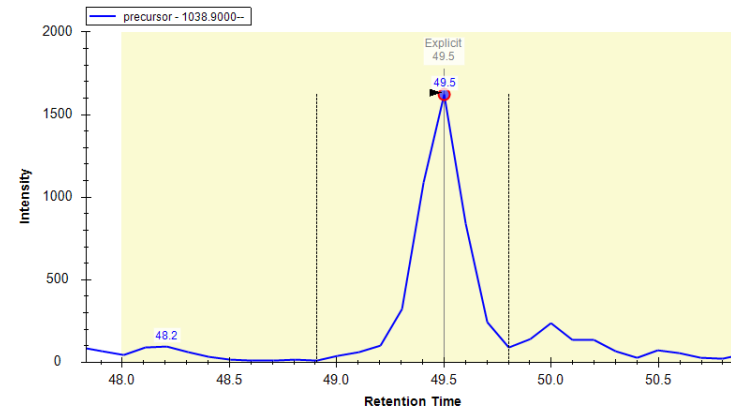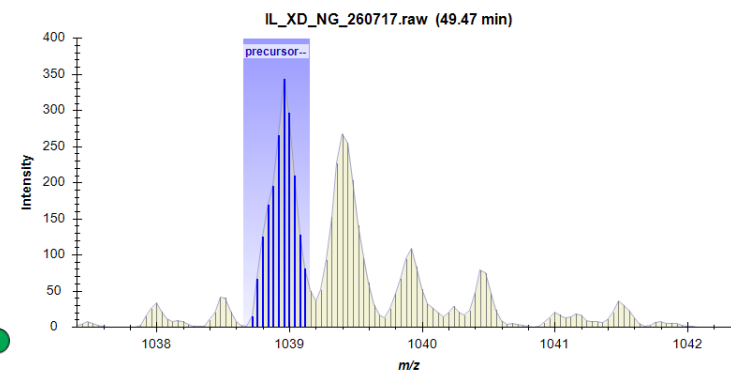

Note: From biosynthetic pathway and presence of D-18 ions, the sialyl LacNAc is predicted to occupy the  $\alpha$ 1,3 arm. Evidence of core fucose. Based on late PGC-LC elution, this glycan is annotated as the  $\alpha$ 2,3-sialyl linkage isomer.

# Glycan #33a

Complex

Hex<sub>2</sub>HexNAc<sub>2</sub>NeuAc<sub>2</sub> + Hex<sub>3</sub>HexNAc<sub>2</sub>

*m/z*: 1111.5<sup>(2-)</sup>

IL\_VB\_NG\_260717 #3529 RT: 35.29 AV: 1 NL: 7.18E1

F: TMS - p ESI d Full ms2 1111.45@cid35.00 [295.00-:

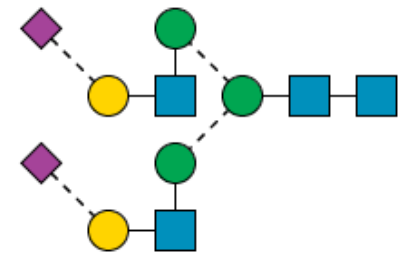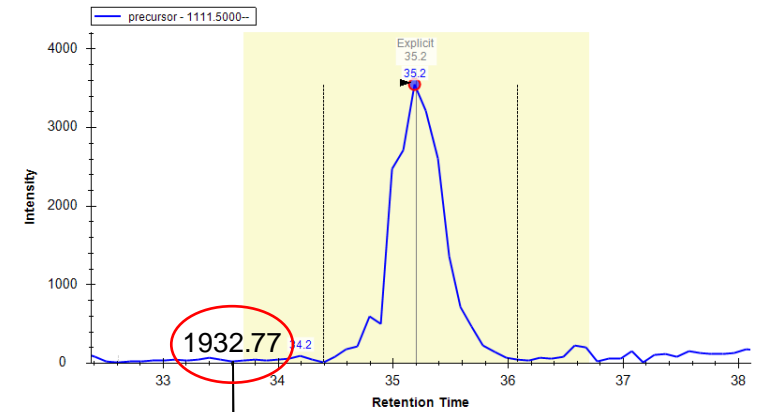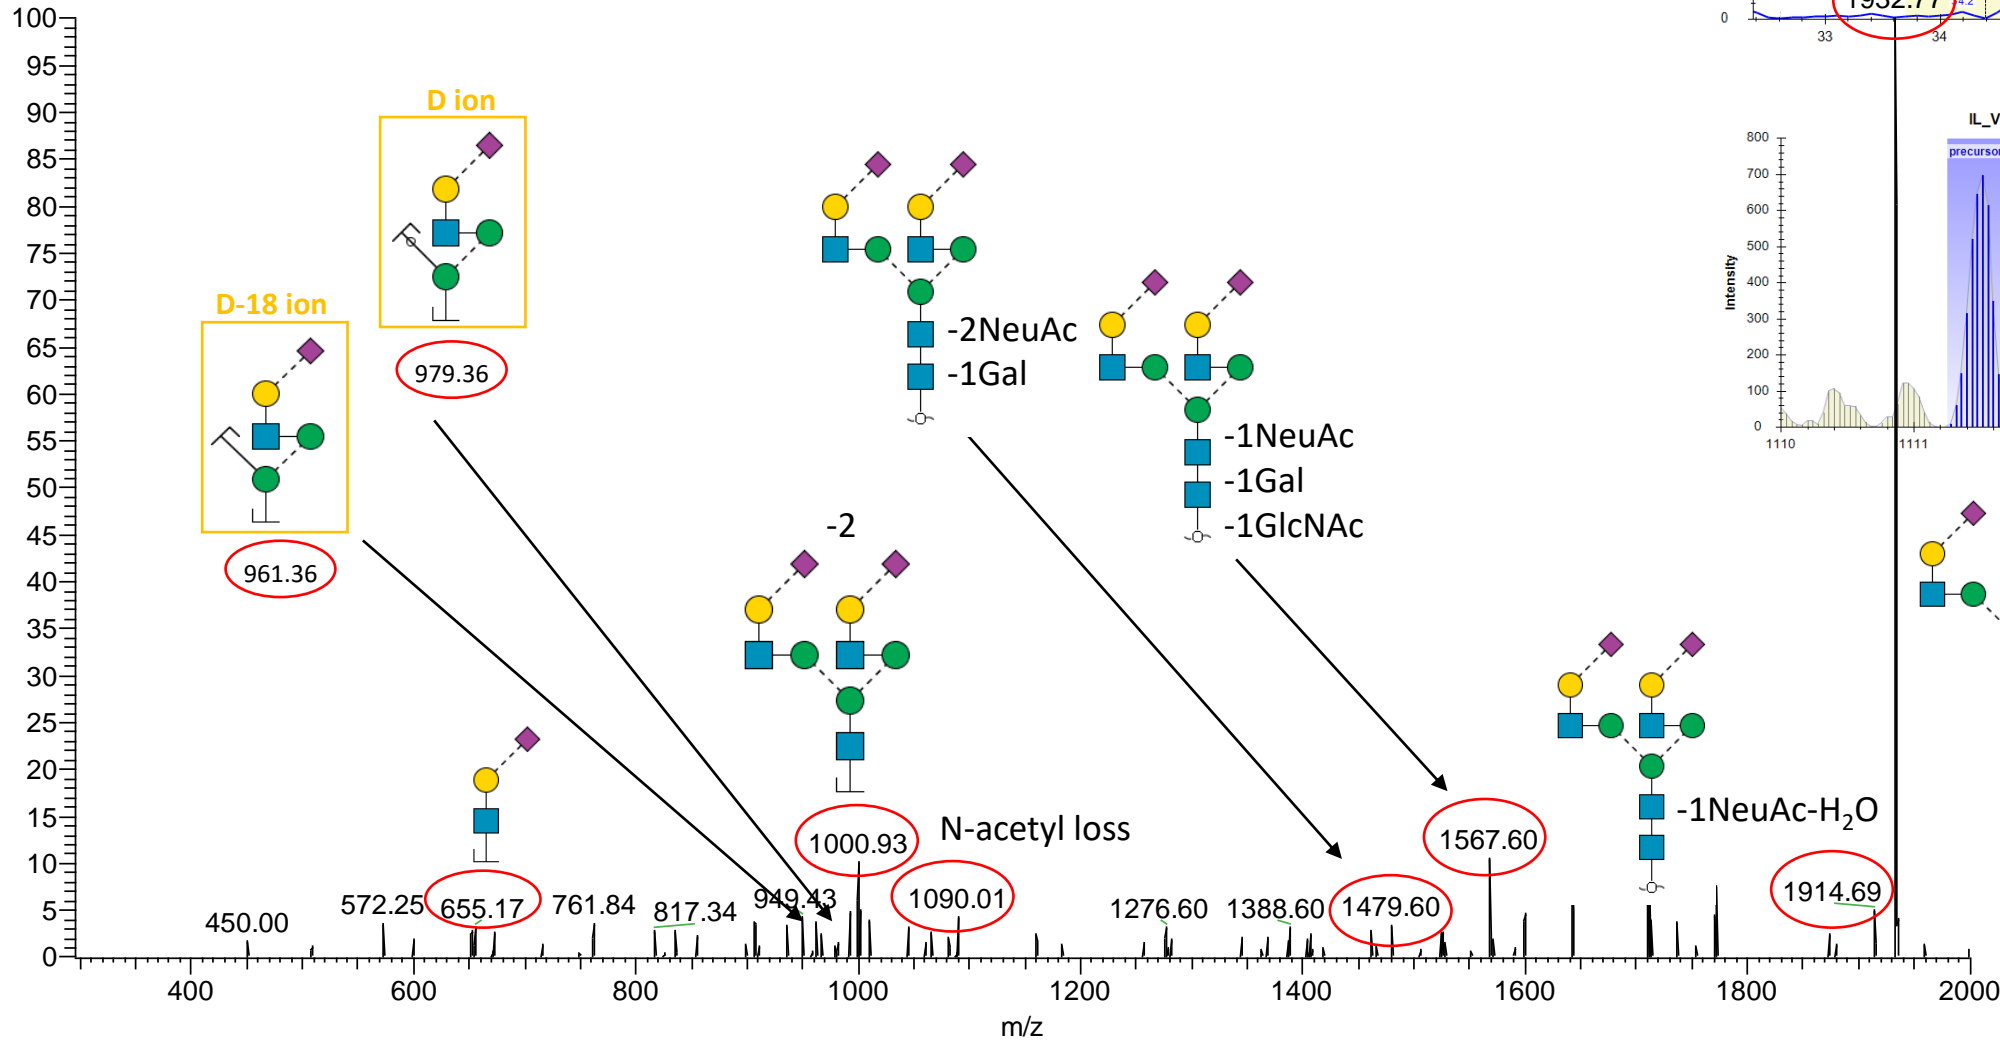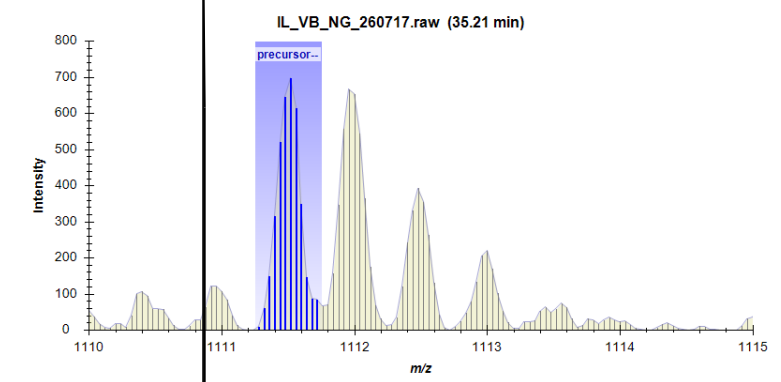

Note: Based on PGC-LC elution pattern, this glycan is annotated as the  $\alpha$ 2,6- $\alpha$ 2,6-sialyl linkage isomer.

# Glycan #33b

Complex

Hex<sub>2</sub>HexNAc<sub>2</sub>NeuAc<sub>2</sub> + Hex<sub>3</sub>HexNAc<sub>2</sub>

*m/z*: 1111.5<sup>(2-)</sup>

IL\_VB\_NG\_260717 #4500 RT: 45.20 AV: 1 NL: 9.48

F: ITMS - p ESI d Full ms2 1111.45@cid35.00 [295.00-]

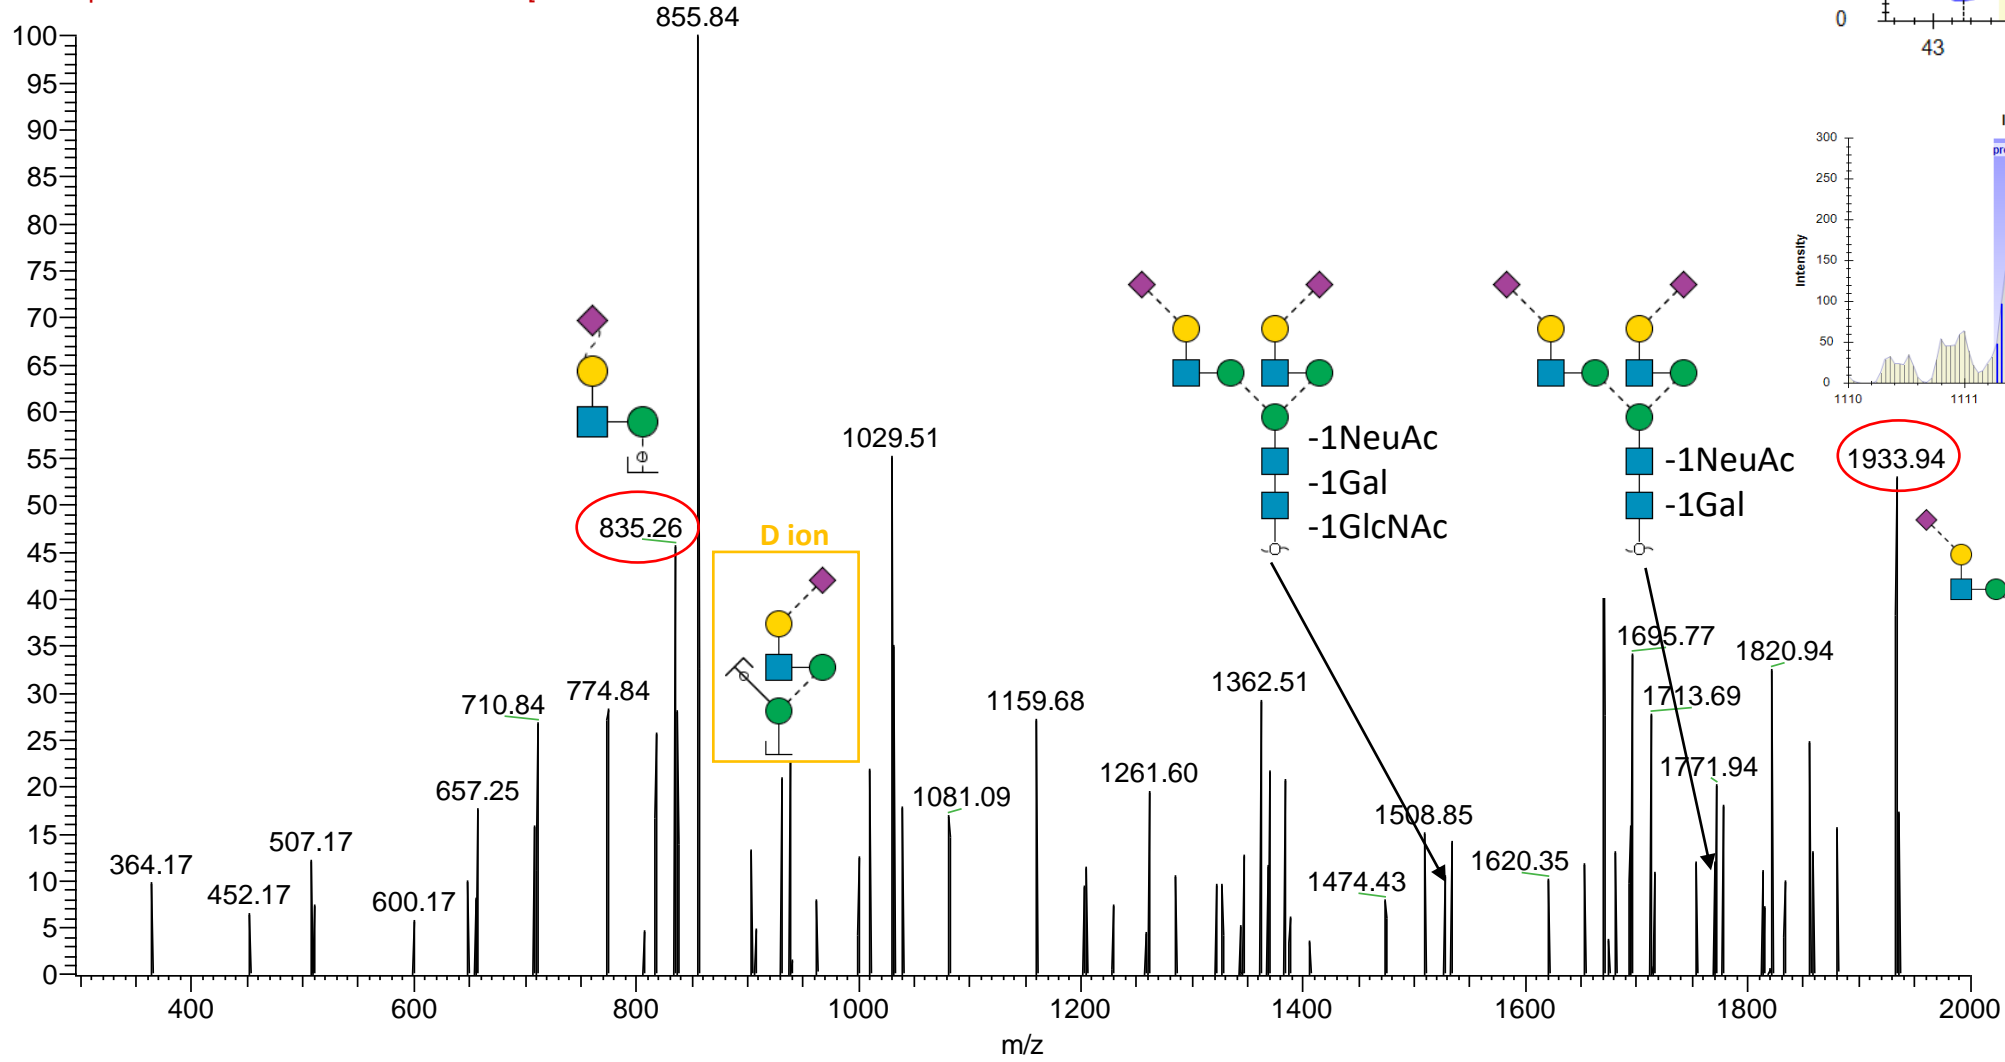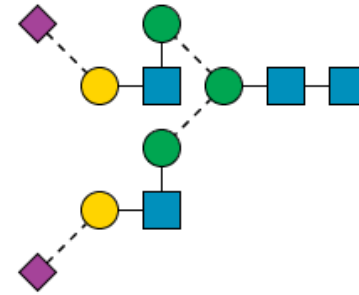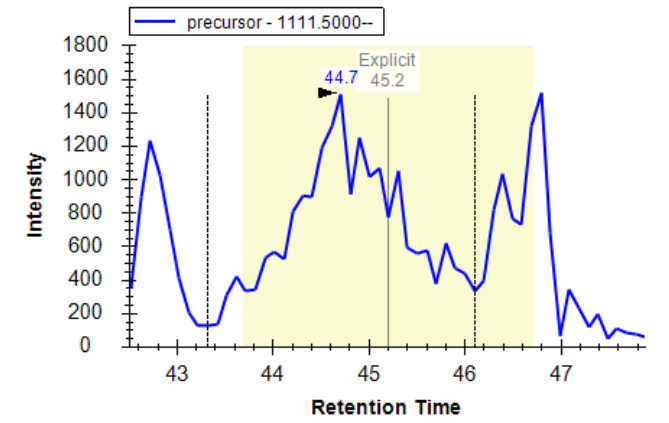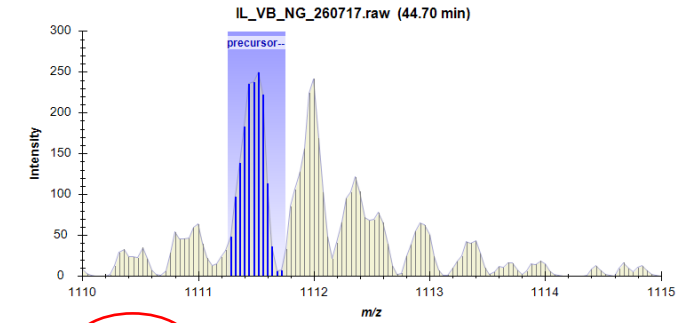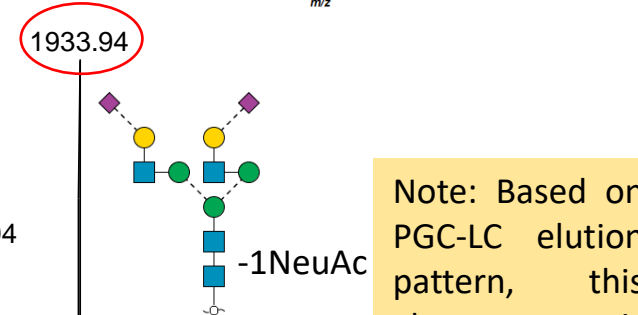

Note: Based on PGC-LC elution pattern, this glycan is annotated as the  $\alpha$ 2,6- $\alpha$ 2,3-sialyl linkage isomer.

# Glycan #34a

Complex

Hex<sub>2</sub>HexNAc<sub>2</sub>Fuc<sub>1</sub>NeuAc<sub>1</sub> + Hex<sub>3</sub>HexNAc<sub>2</sub>Fuc<sub>1</sub>

*m/z*: 1112.0<sup>(2-)</sup>

IL\_XB\_NG\_260717 #3874 RT: 38.96 AV: 1 NL: 7.19E1

F: ITMS - p ESI d Full ms2 1111.96@cid35.00 [295.00-;

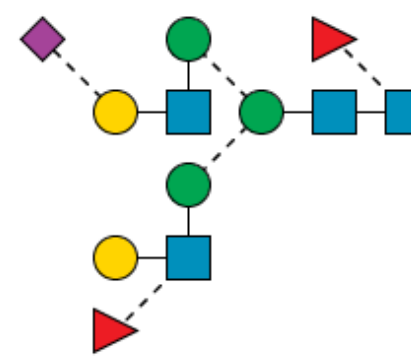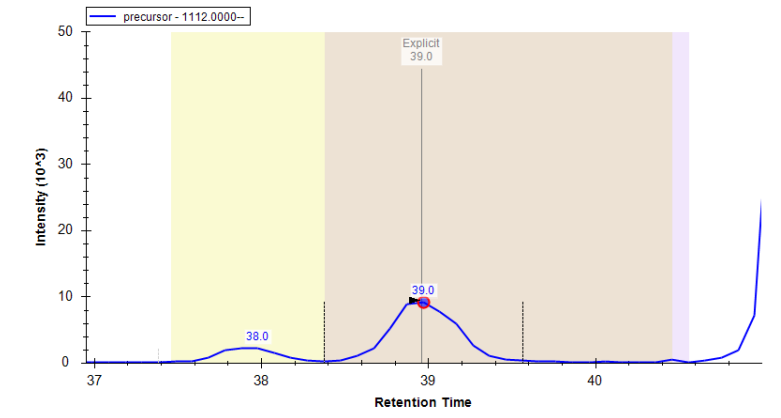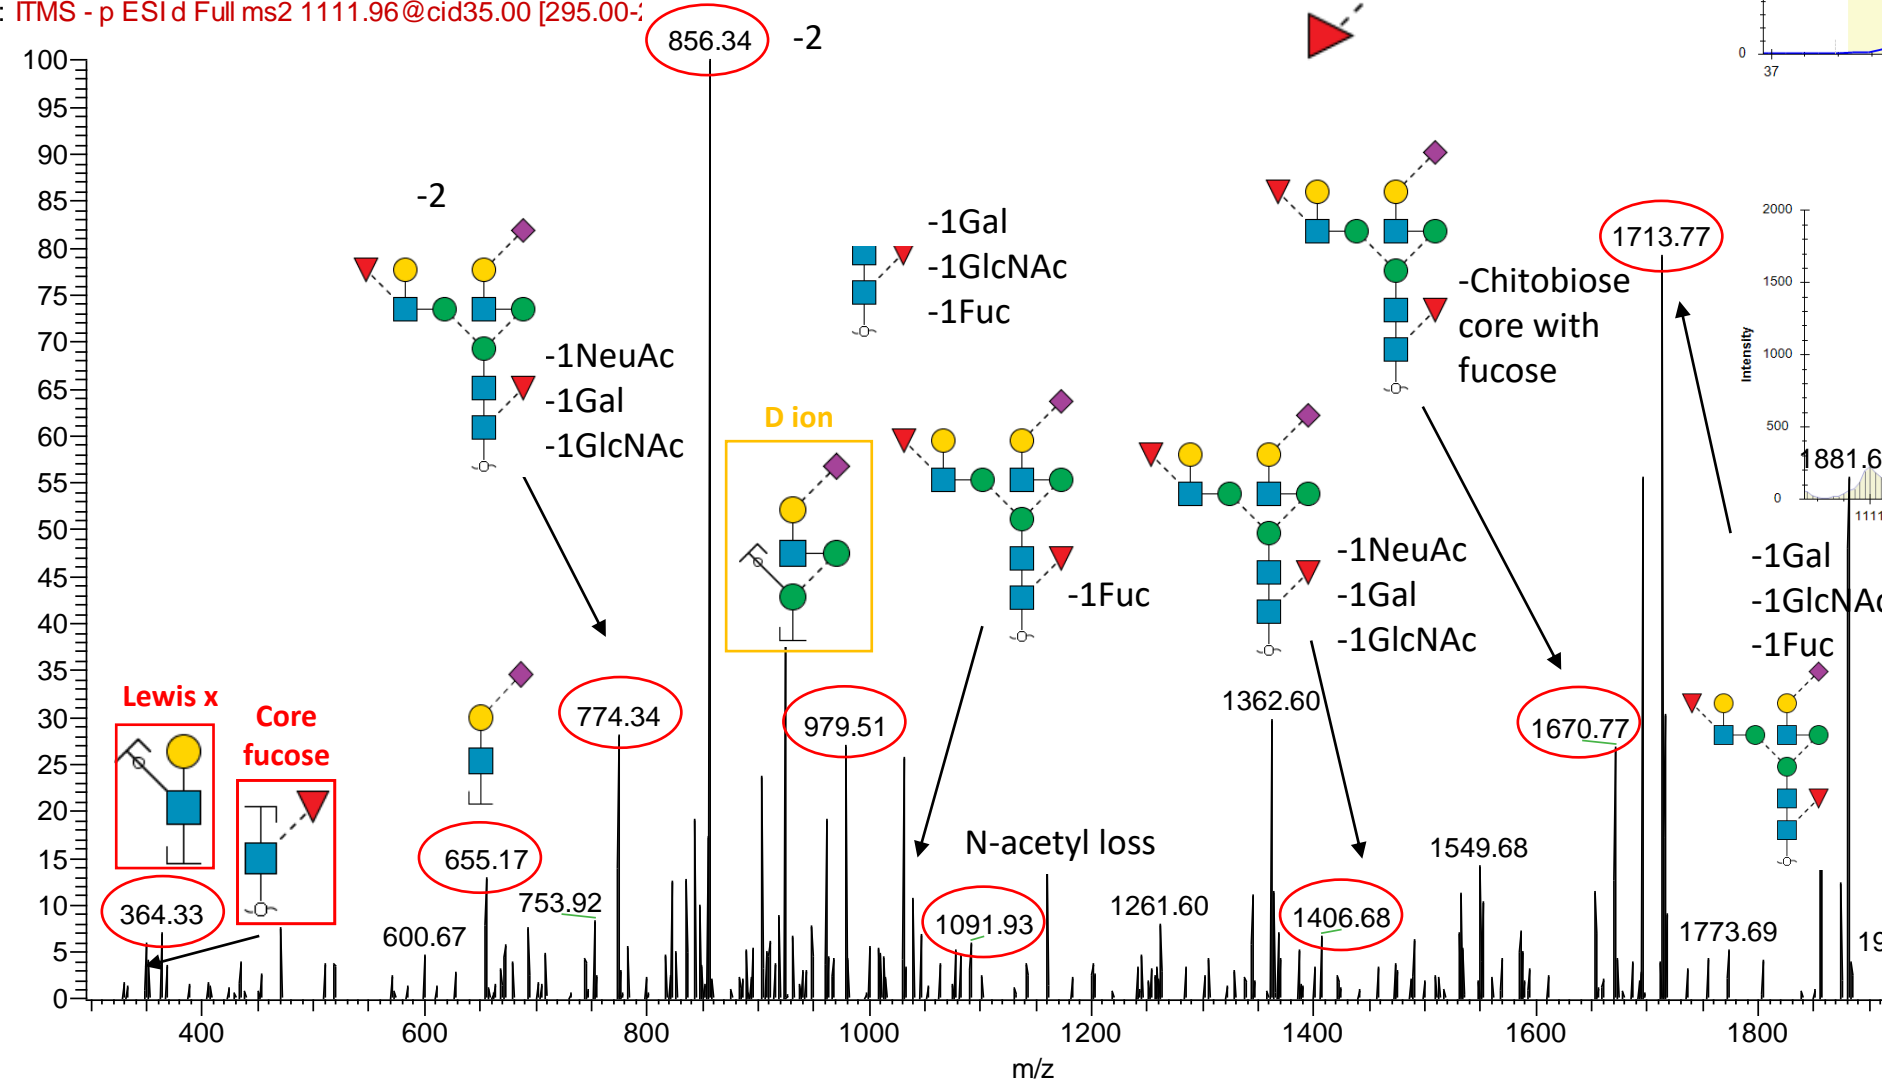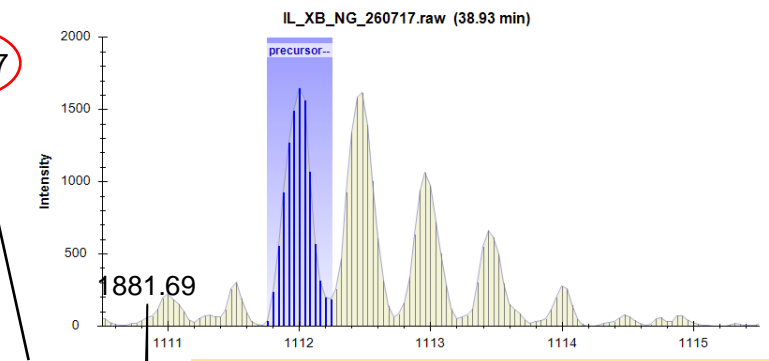

Note: Based on PGC-LC elution pattern, this glycan is annotated as the  $\alpha$ 2,6-sialyl linkage isomer. Indication of both core and antenna fucose. The exact antennary fucosyl linkage(s) (here drawn as alpha1,3) remains undetermined. The exact antennary fucosyl linkage(s) (here drawn as alpha1,3) remains undetermined. The exact antennary fucosyl linkage(s) (here drawn as alpha1,3) remains undetermined.

# Glycan #34b

## Complex

Hex<sub>2</sub>HexNAc<sub>2</sub>Fuc<sub>1</sub>NeuAc<sub>1</sub> + Hex<sub>3</sub>HexNAc<sub>2</sub>Fuc<sub>1</sub>

*m/z*: 1112.0<sup>(2-)</sup>

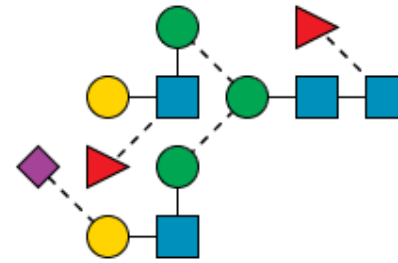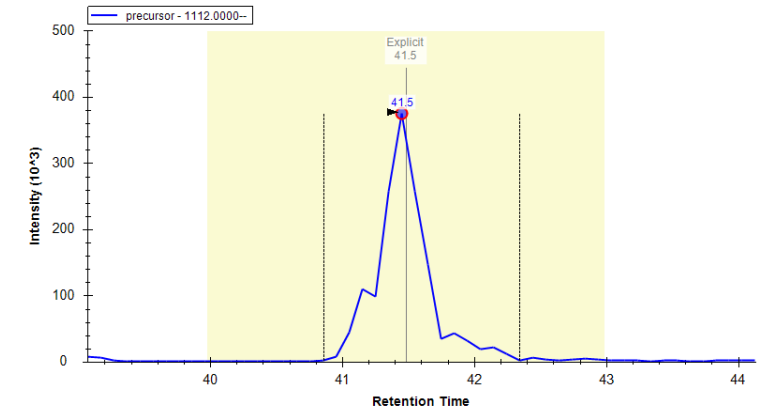

IL\_XB\_NG\_260717 #4132 RT: 41.48 AV: 1 NL: 2.59E3

F: ITMS - p ESI d Full ms2 1111.96@cid35.00 [295.00-]

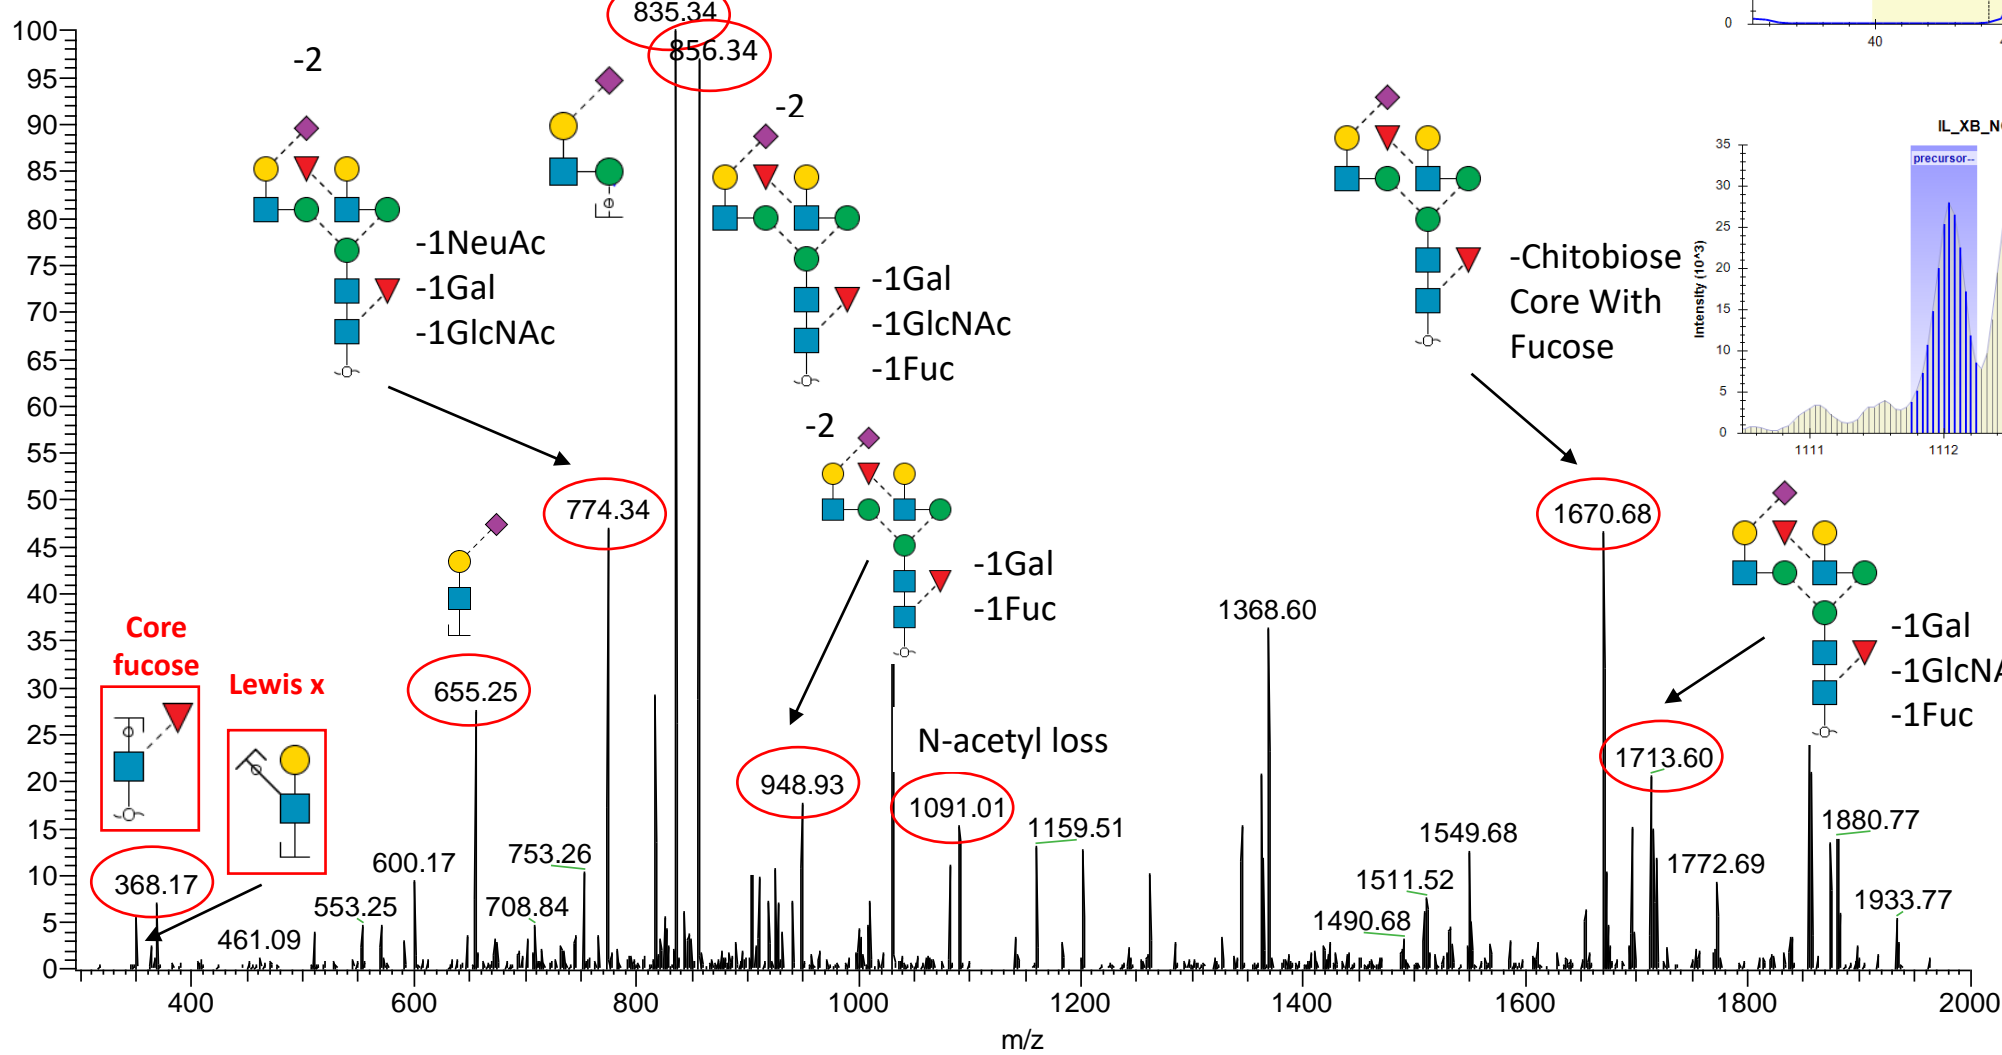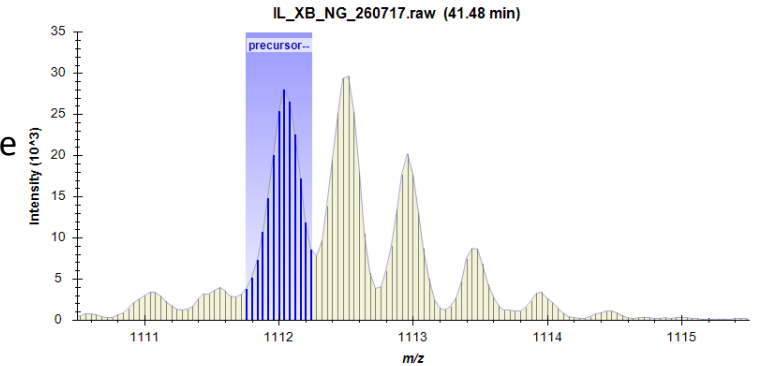

Note: Based on the early PGC-LC elution pattern, this glycan is annotated as the  $\alpha$ 2,6-sialyl linkage isomer. Indication of both core and antenna fucose. The exact antennary fucosyl linkage(s) (here drawn as  $\alpha$ 1,3) remains undetermined.

# Glycan #35a

Complex

Hex<sub>2</sub>HexNAc<sub>2</sub>NeuAc<sub>2</sub> + Hex<sub>3</sub>HexNAc<sub>2</sub>Fuc<sub>1</sub>

*m/z*: 1184.5 (2-)

IL\_XB\_NG\_260717 #4022 RT: 40.45 AV: 1 NL: 1.57E2  
F: ITMS - p ESI d Full ms2 1184.47@cid35.00 [315.00-]

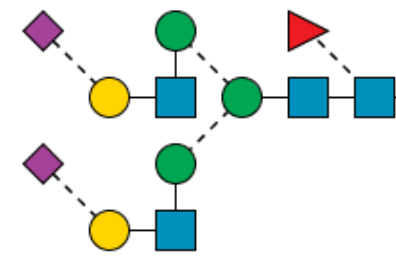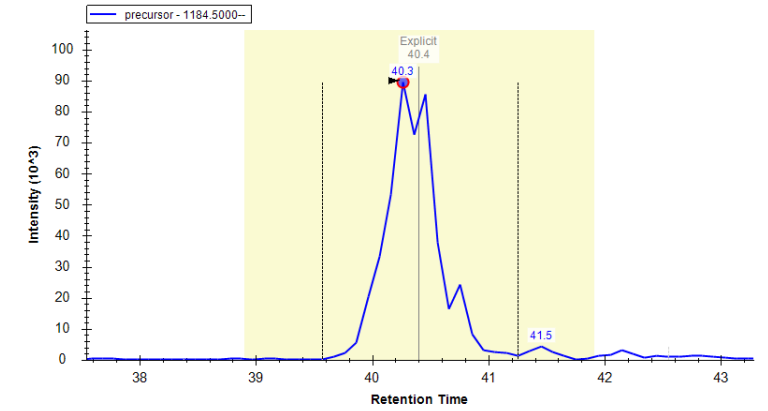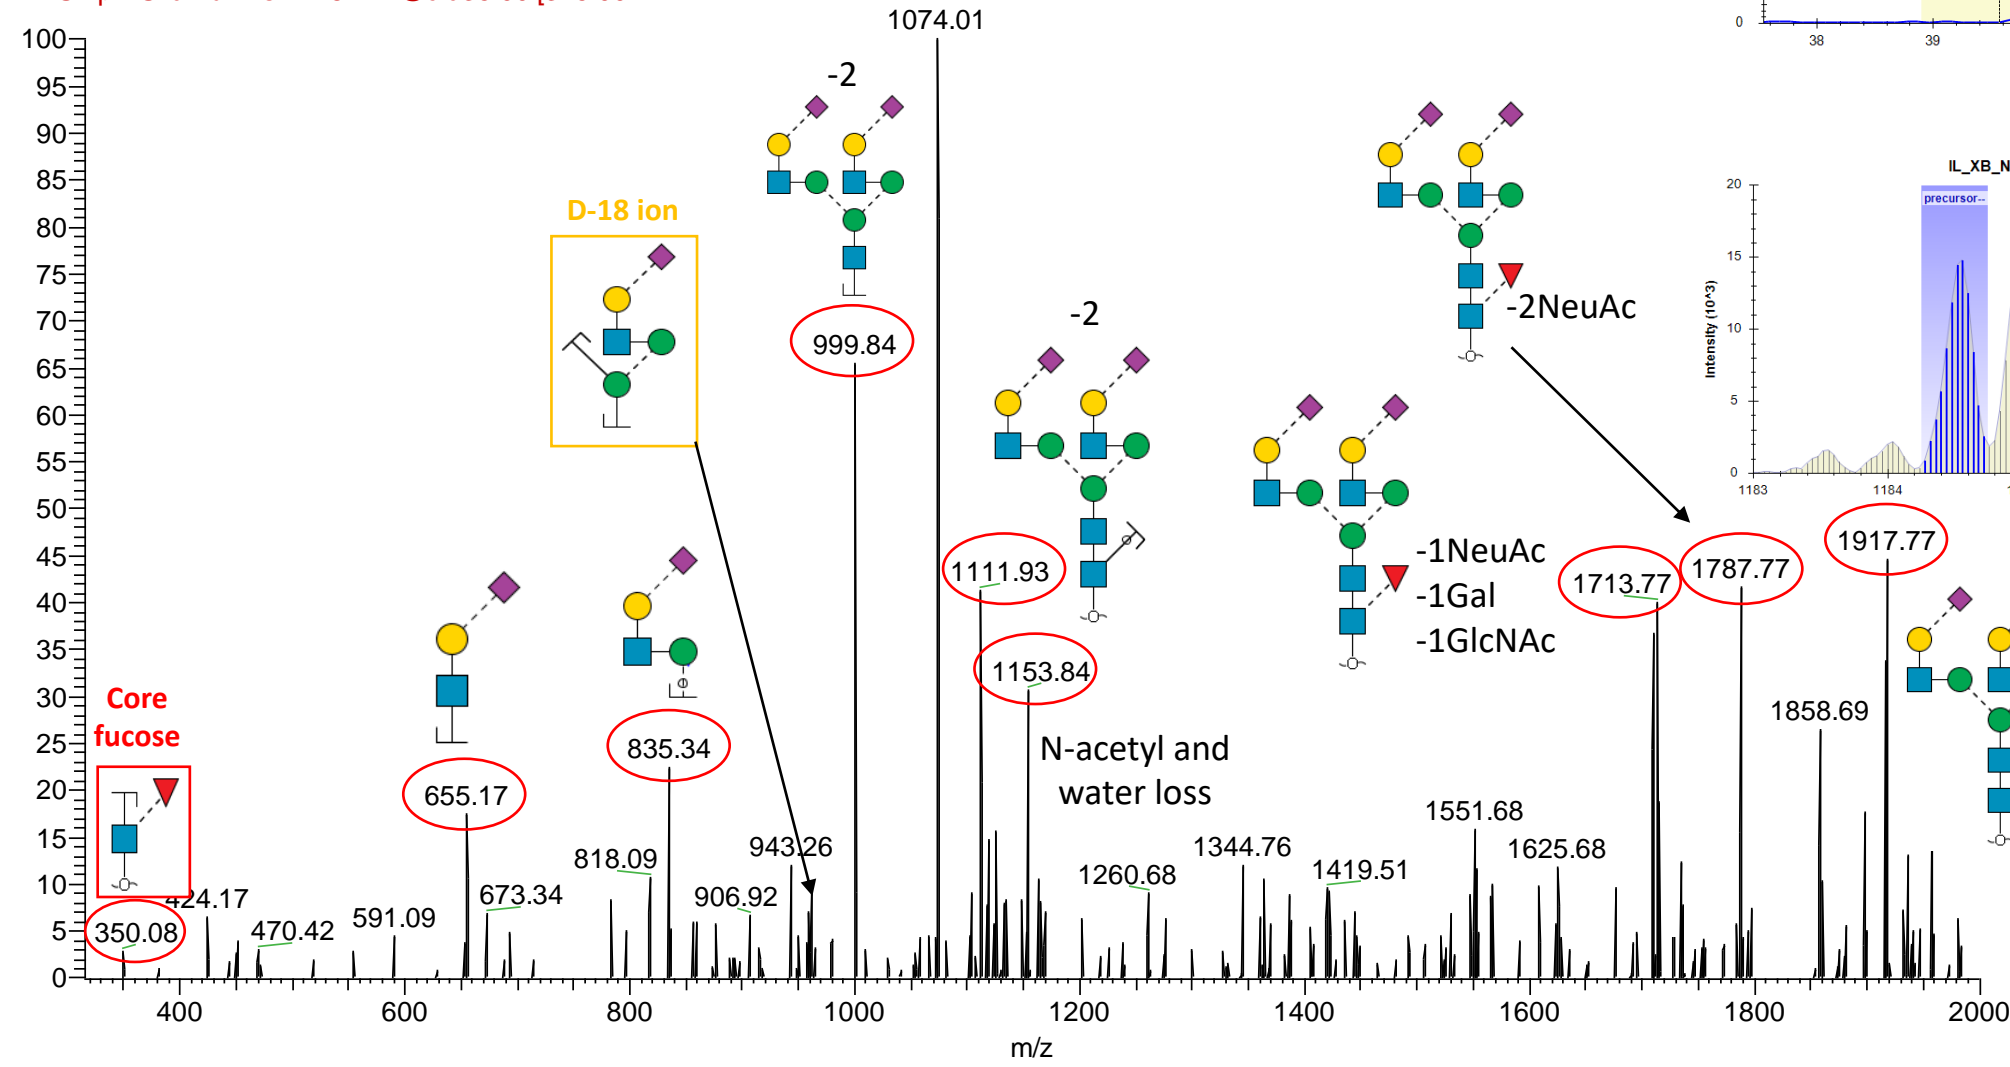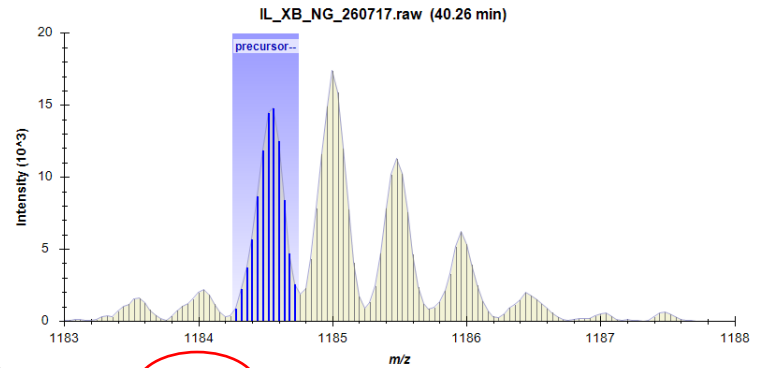

Note: Based on PGC-LC elution pattern, this glycan is annotated as the  $\alpha$ 2,6- $\alpha$ 2,6-sialyl linkage isomer. Indication of core fucose.

# Glycan #35b

Complex

Hex<sub>2</sub>HexNAc<sub>2</sub>NeuAc<sub>2</sub> + Hex<sub>3</sub>HexNAc<sub>2</sub>Fuc<sub>1</sub>

*m/z*: 1184.5<sup>(2-)</sup>

IL\_XB\_NG\_260717 #4772 RT: 48.11 AV: 1 NL: 3.04E1

F: ITMS - p ESI d Full ms2 1184.47@cid35.00 [315.00-]

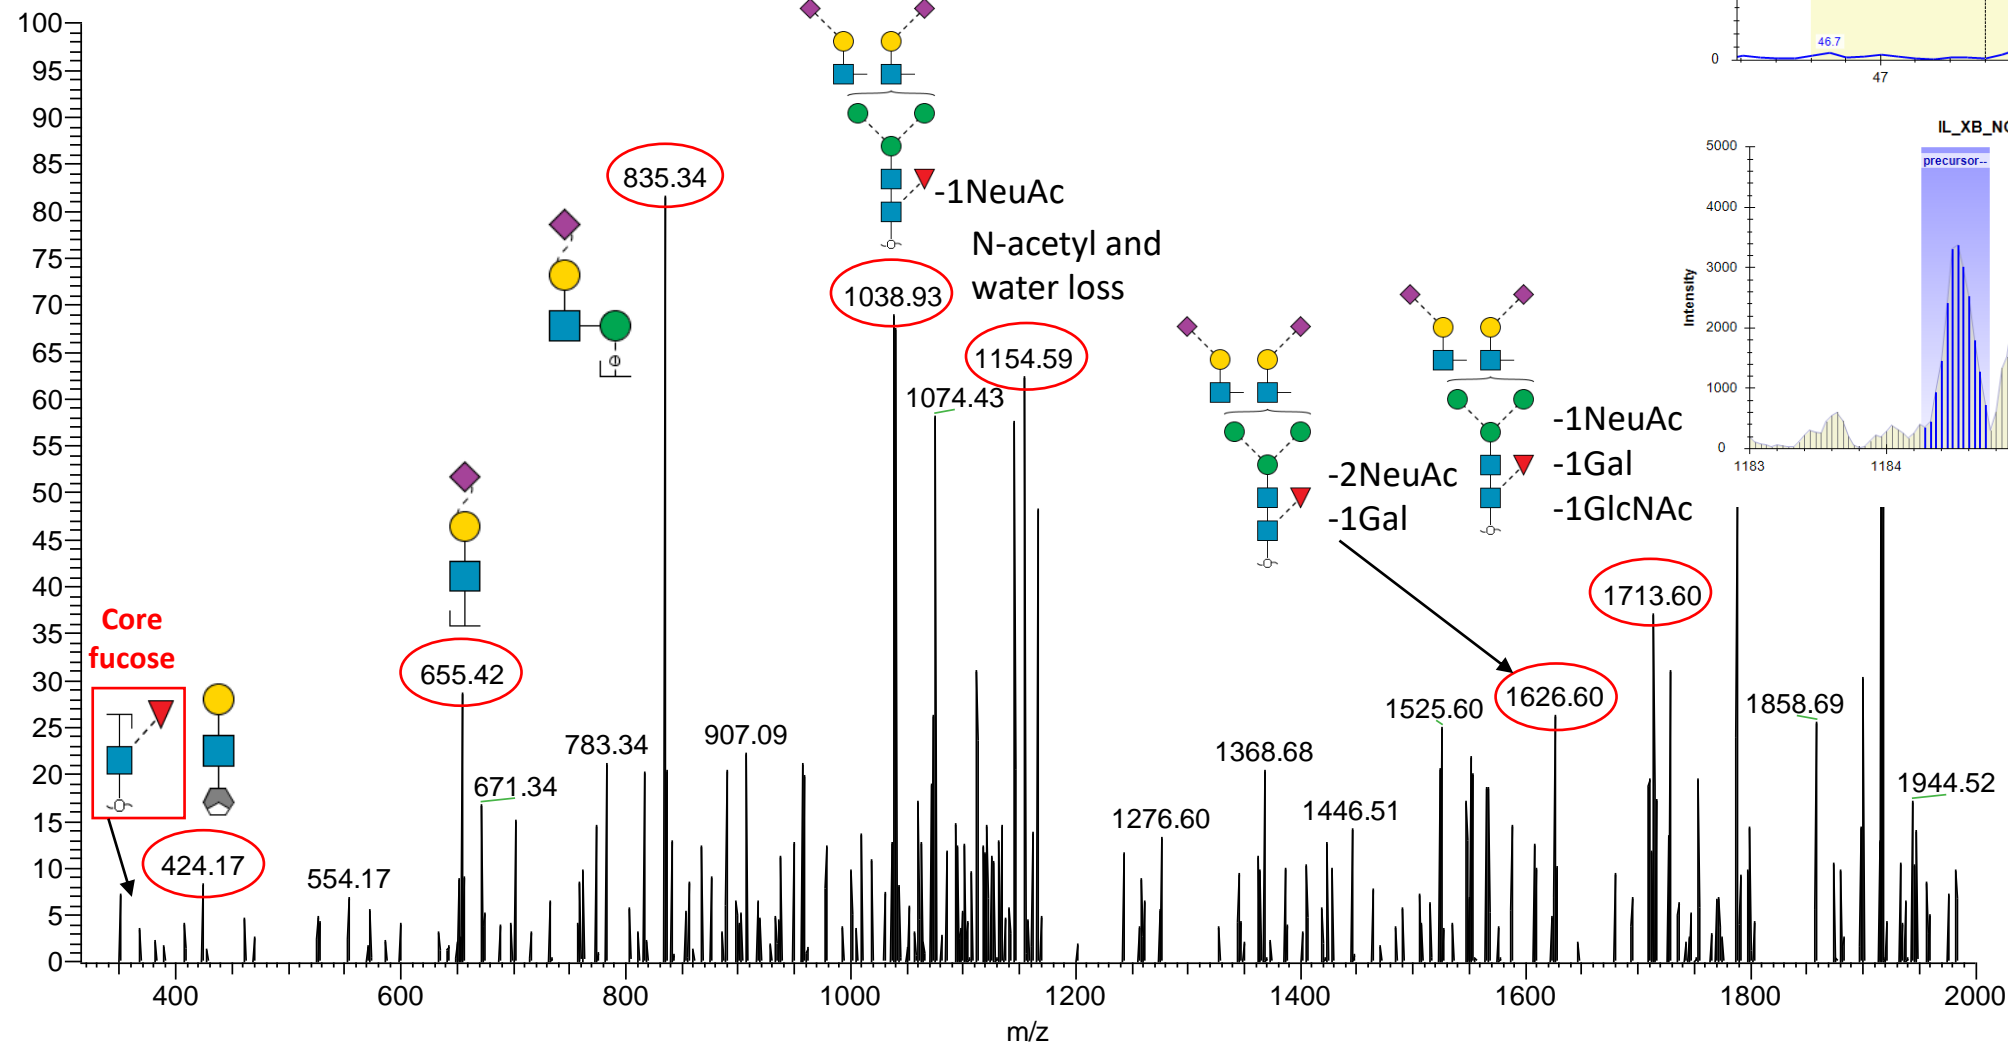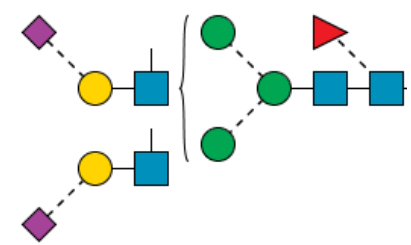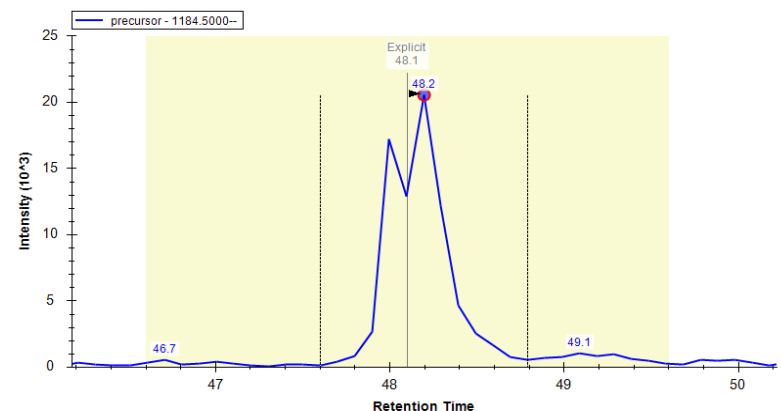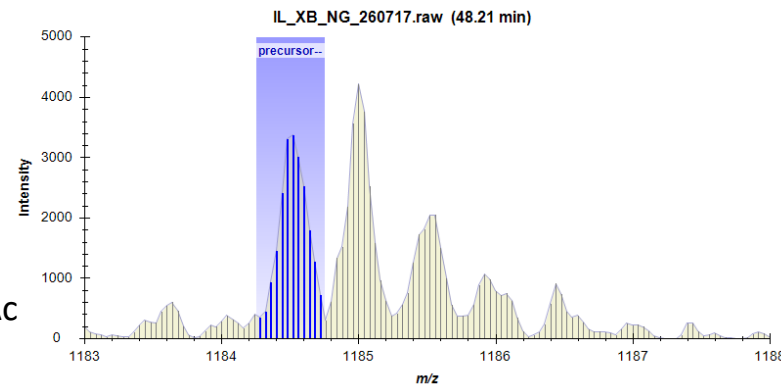

Note: Based on PGC-LC elution pattern, this glycan is annotated as the α2,6-α2,3-sialyl linkage isomer. Indication of core fucose.

# Glycan #36a

Complex

Hex<sub>3</sub>HexNAc<sub>3</sub>NeuAc<sub>1</sub> + Hex<sub>3</sub>HexNAc<sub>2</sub>Fuc<sub>1</sub>

m/z: 1221.5 (2-)

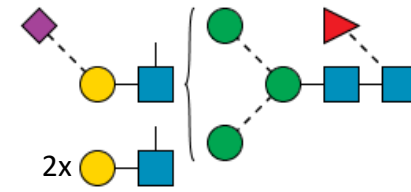

IL\_XB\_NG\_260717 #4512 RT: 45.37 AV: 1 NL: 1.00E2

F: ITMS - p ESI d Full ms2 1221.66@cid35.00 [325.00-]

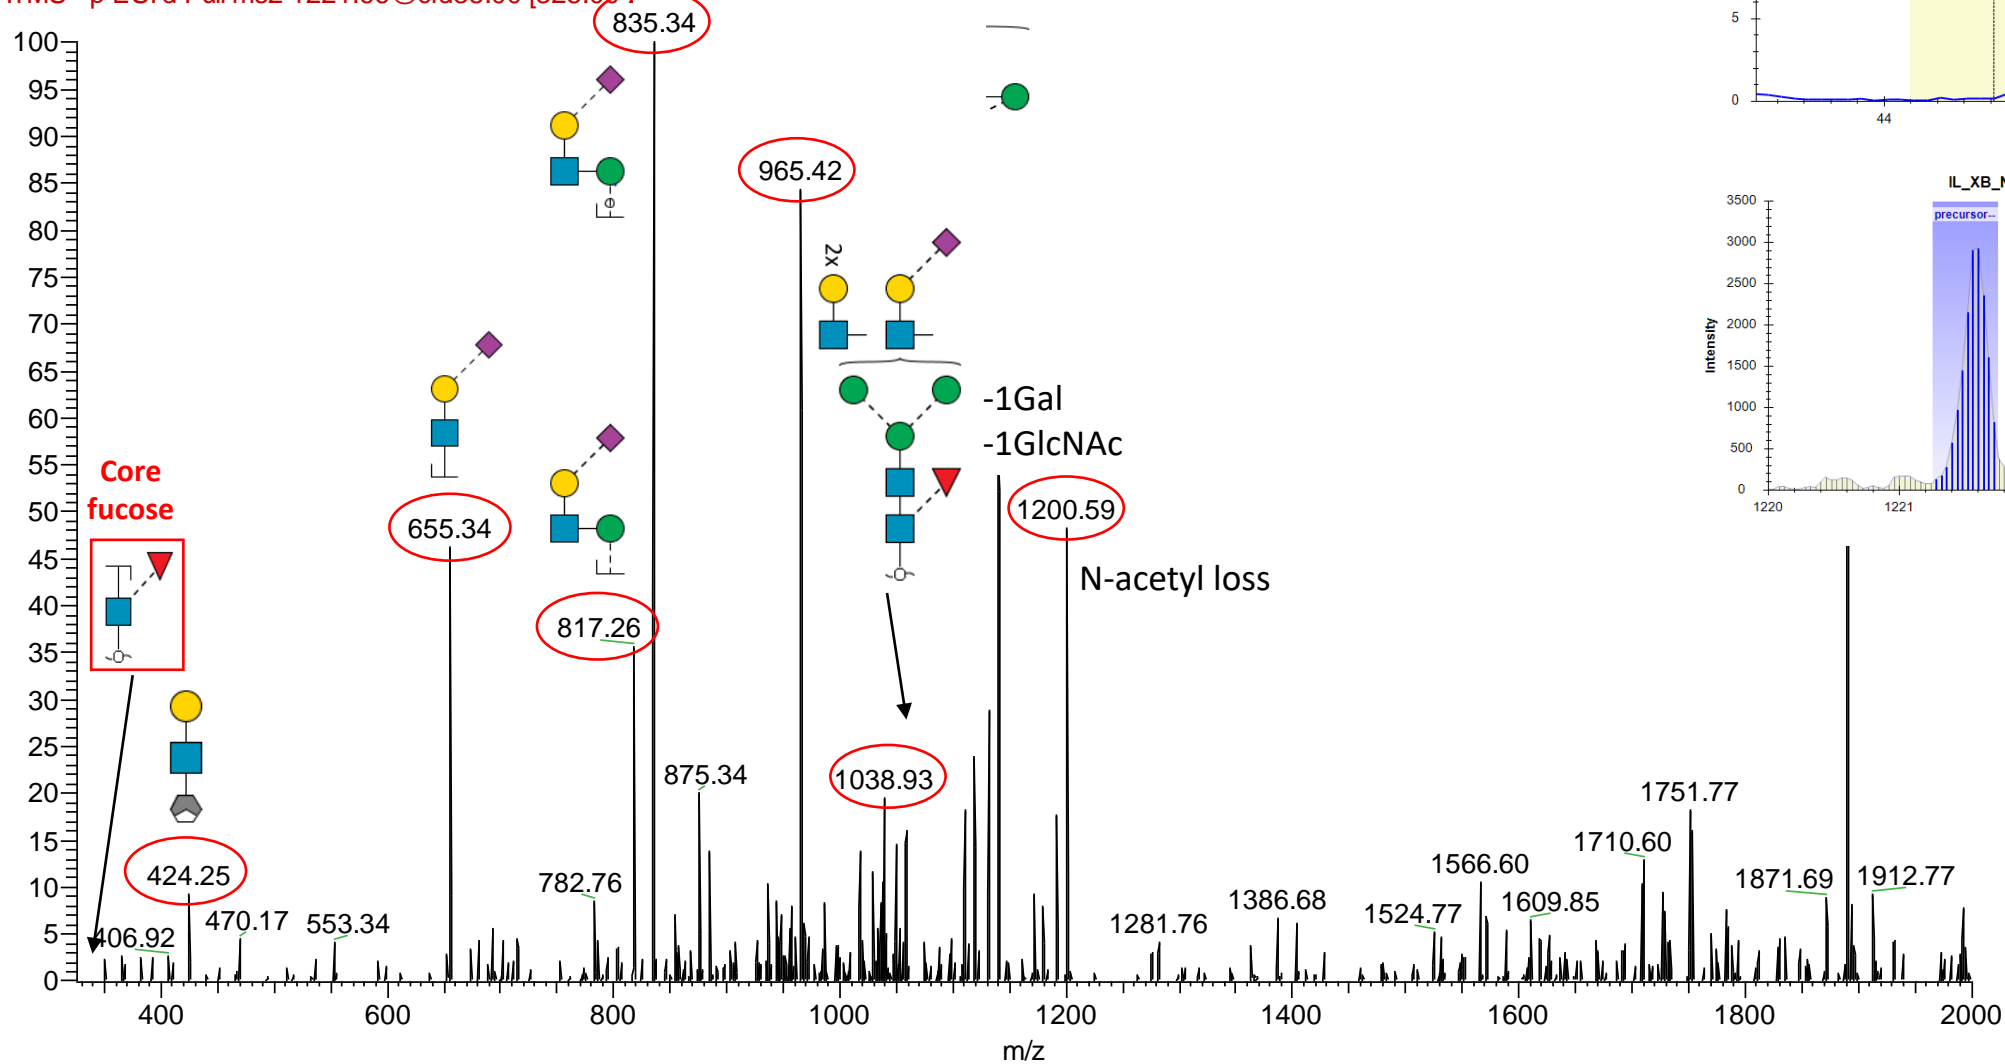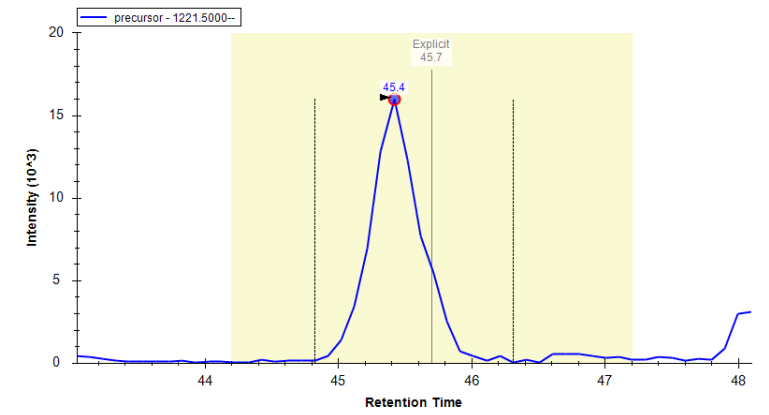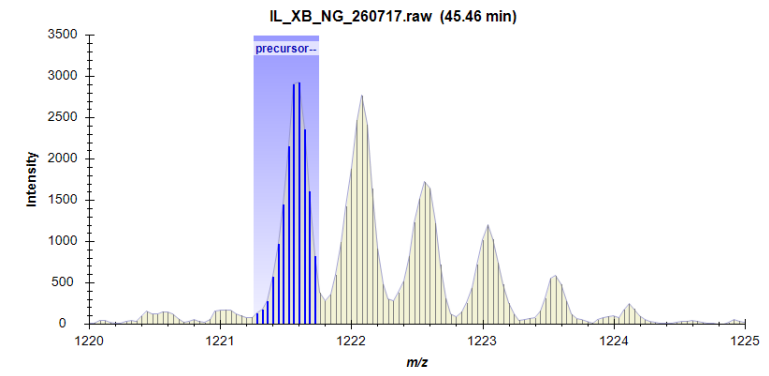

Note: Based on PGC-LC elution pattern, this glycan is annotated as the  $\alpha$ 2,6-sialyl linkage isomer. Indication of core fucose.



# Glycan #36b

Complex

Hex<sub>3</sub>HexNAc<sub>3</sub>NeuAc<sub>1</sub> + Hex<sub>3</sub>HexNAc<sub>2</sub>Fuc<sub>1</sub>

*m/z*: 1221.5 (2-)

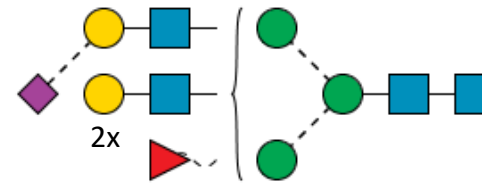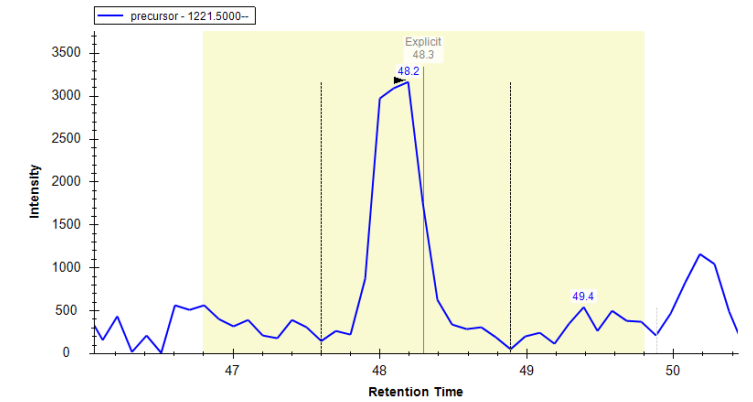

No MS/MS available in glycomics data

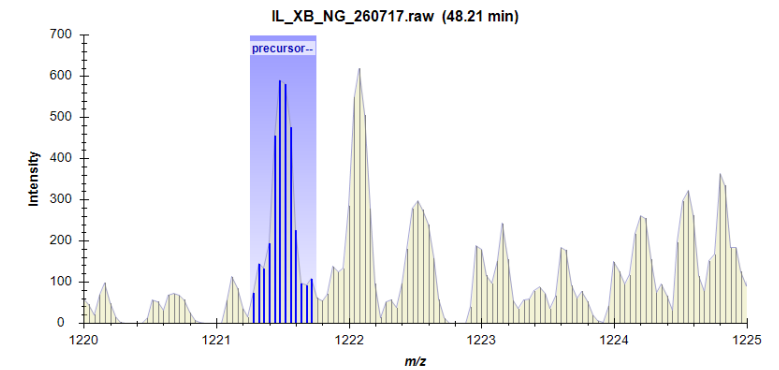

Note: Based on MS1 and retention time and the suspected biosynthetic relationship to Glycan #36a, this glycan has tentatively been annotated as the alpha2,3-sialyl isomer variant of Glycan #36a

# Glycan #37a

## Complex

Hex<sub>3</sub>HexNAc<sub>3</sub>NeuAc<sub>1</sub>Fuc<sub>2</sub> + Hex<sub>3</sub>HexNAc<sub>2</sub>

*m/z*: 1294.6<sup>(2-)</sup>

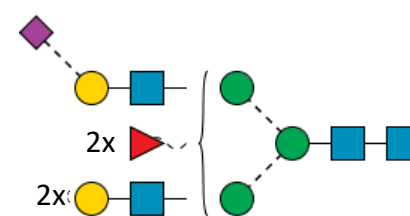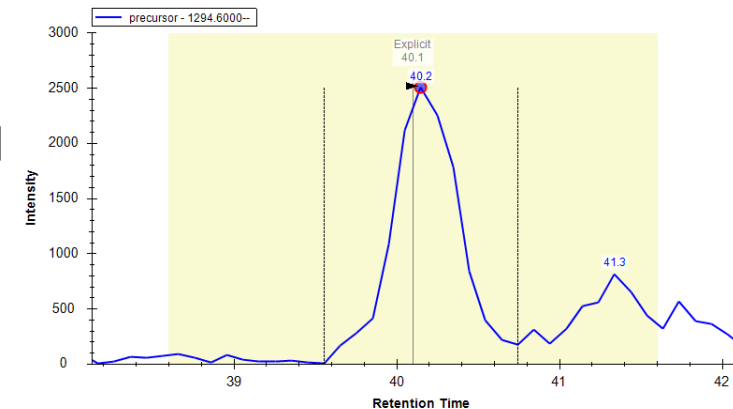

IL\_VB\_NG\_260717 #4000 RT: 40.09 AV: 1 NL: 1.32E1

F: ITMS - p ESI d Full ms2 1294.56@cid35.00 [345.00-]

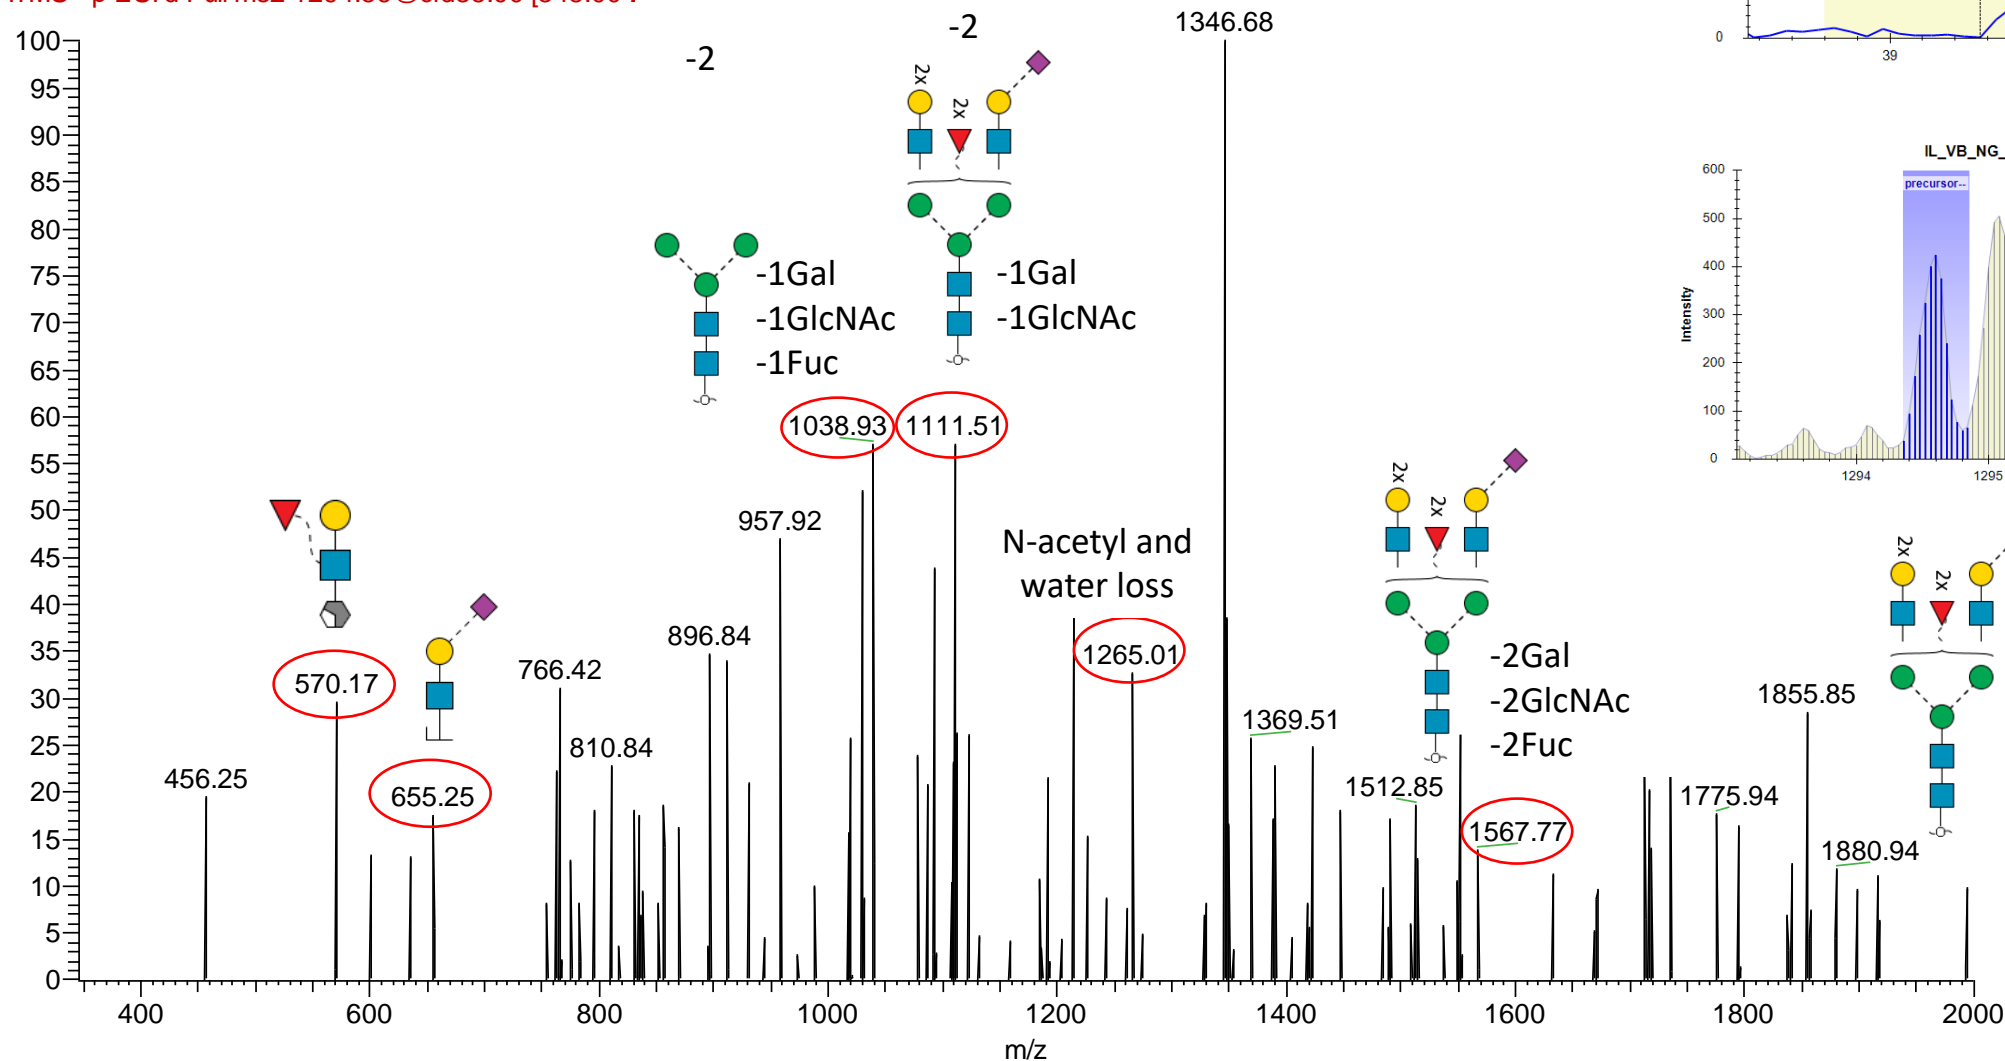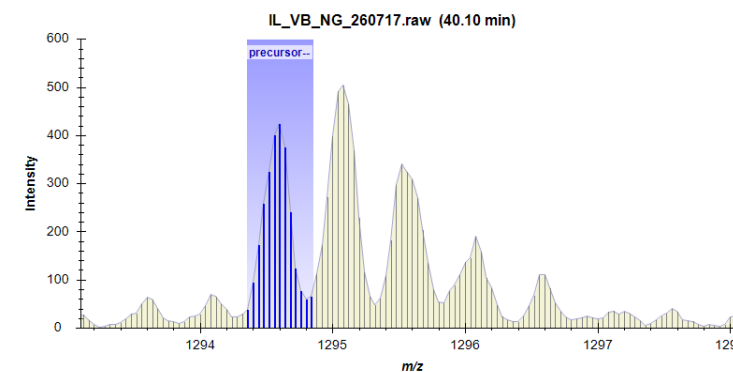

Note: Based on PGC-LC elution pattern, this glycan is annotated as the  $\alpha$ 2,6-sialyl linkage isomer. Since there is no sign of core fucosylation, this structure has been annotated as being antenna fucosylated.

# Glycan #37b

Complex

Hex<sub>3</sub>HexNAc<sub>3</sub>NeuAc<sub>1</sub>Fuc<sub>2</sub> + Hex<sub>3</sub>HexNAc<sub>2</sub>

*m/z*: 1294.6<sup>(2-)</sup>

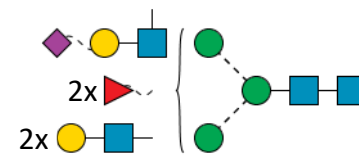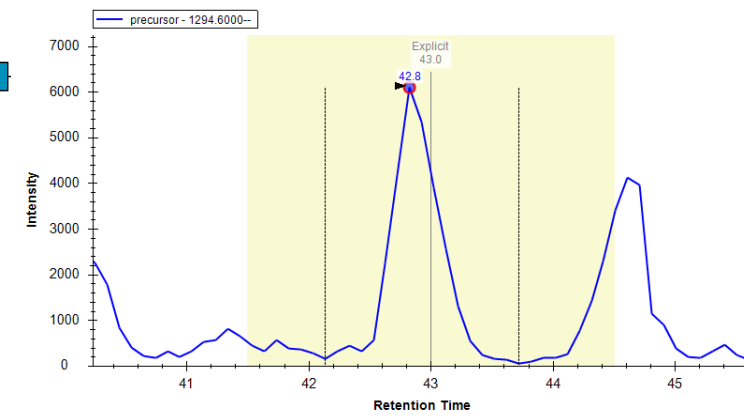

IL\_VB\_NG\_260717 #4285 RT: 43.00 AV: 1 NL: 3.25E1  
F: ITMS - p ESI d Full ms2 1294.56@cid35.00 [345.00-]

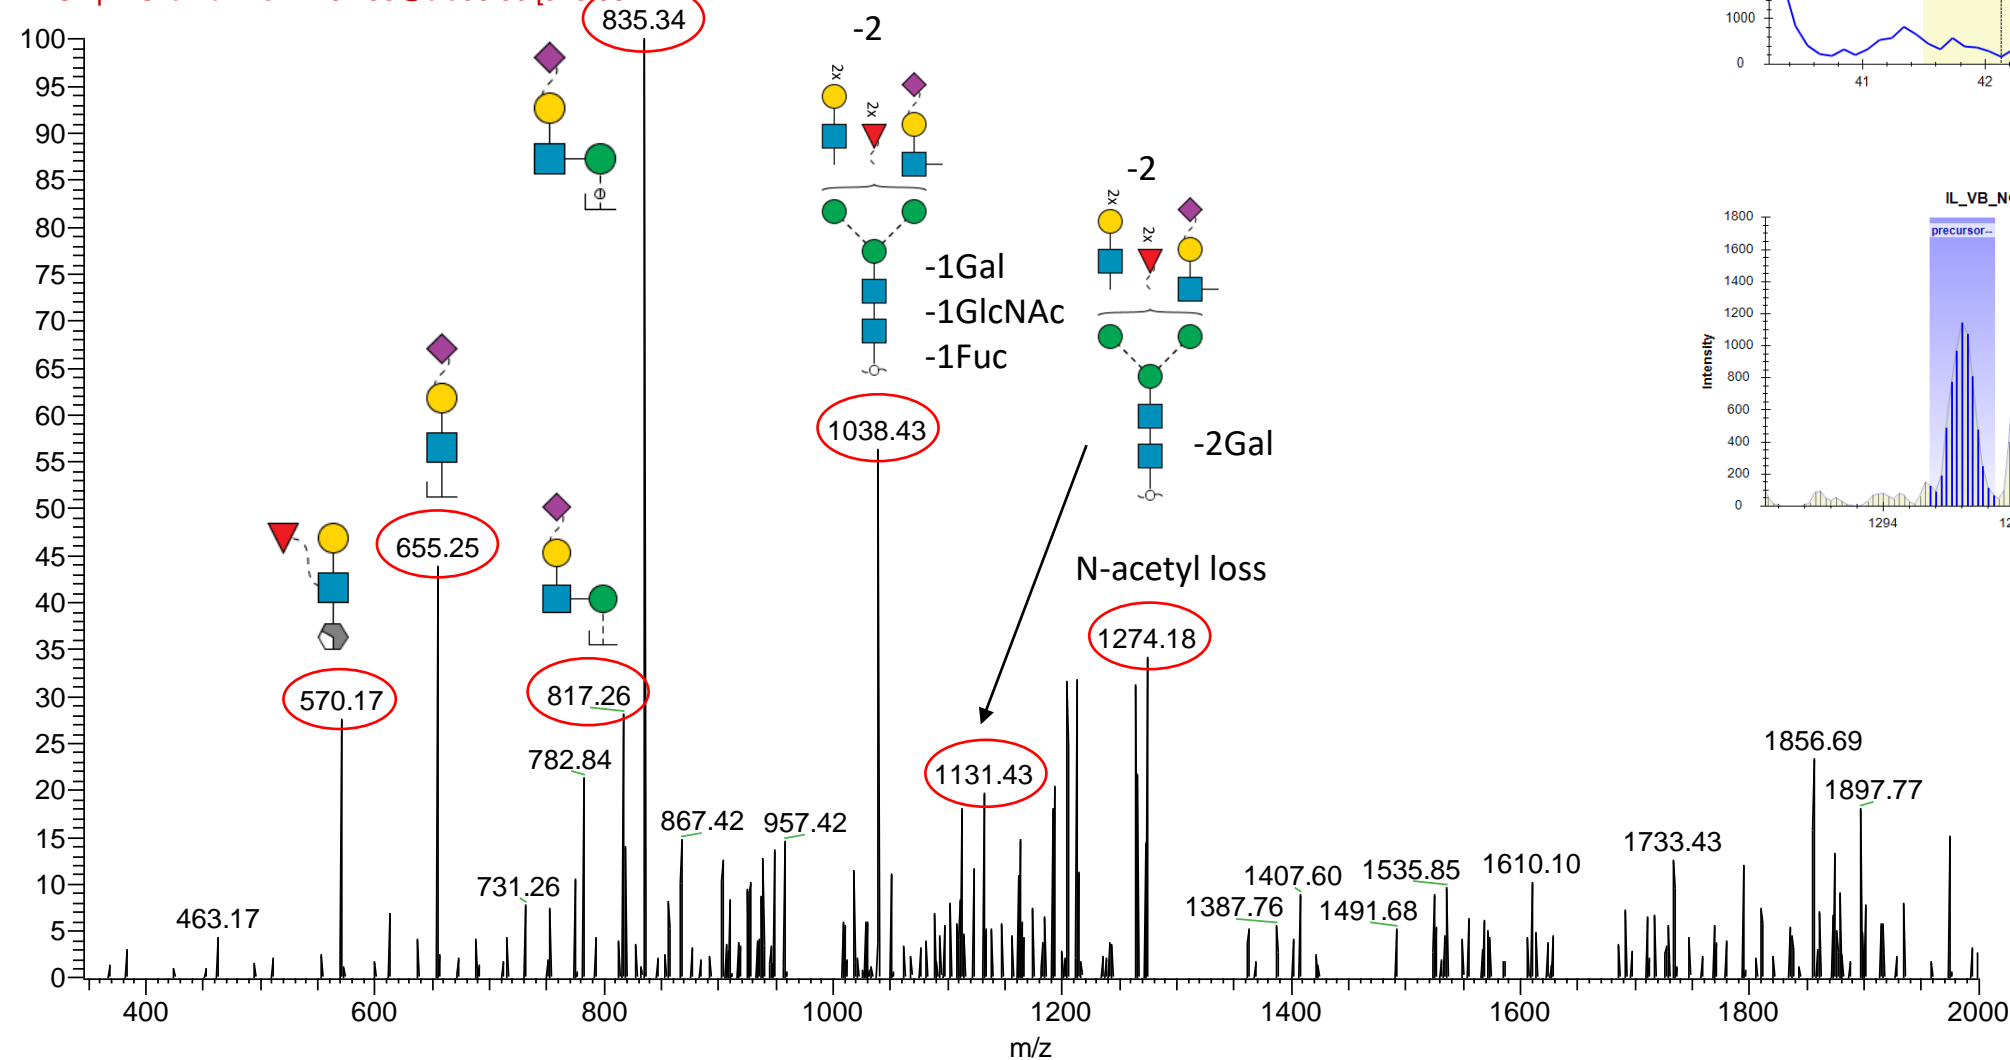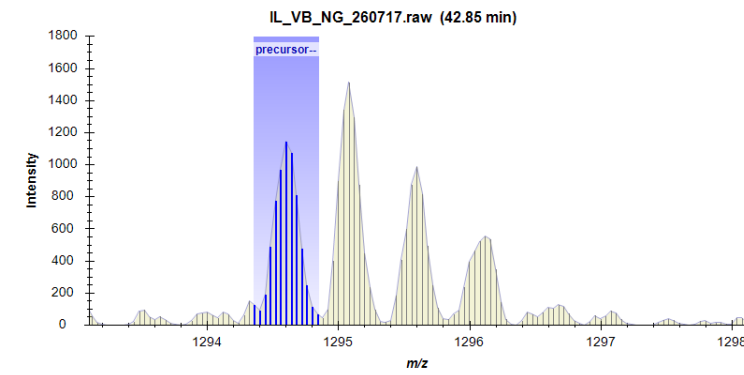

Note: Due to the lack of other isomers, this glycan is annotated with an unknown sialyl linkage isomer. Since there is no sign of core fucosylation, this structure has been annotated as being antenna fucosylated.

# Glycan #37c

Complex

Hex<sub>3</sub>HexNAc<sub>3</sub>NeuAc<sub>1</sub>Fuc<sub>2</sub> + Hex<sub>3</sub>HexNAc<sub>2</sub>

*m/z*: 1294.6<sup>(2-)</sup>

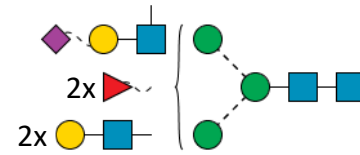

IL\_VB\_NG\_260717 #4437 RT: 44.55 AV: 1 NL: 1.60E1

F: ITMS - p ESI d Full ms2 1294.56@cid35.00 [345.00-]

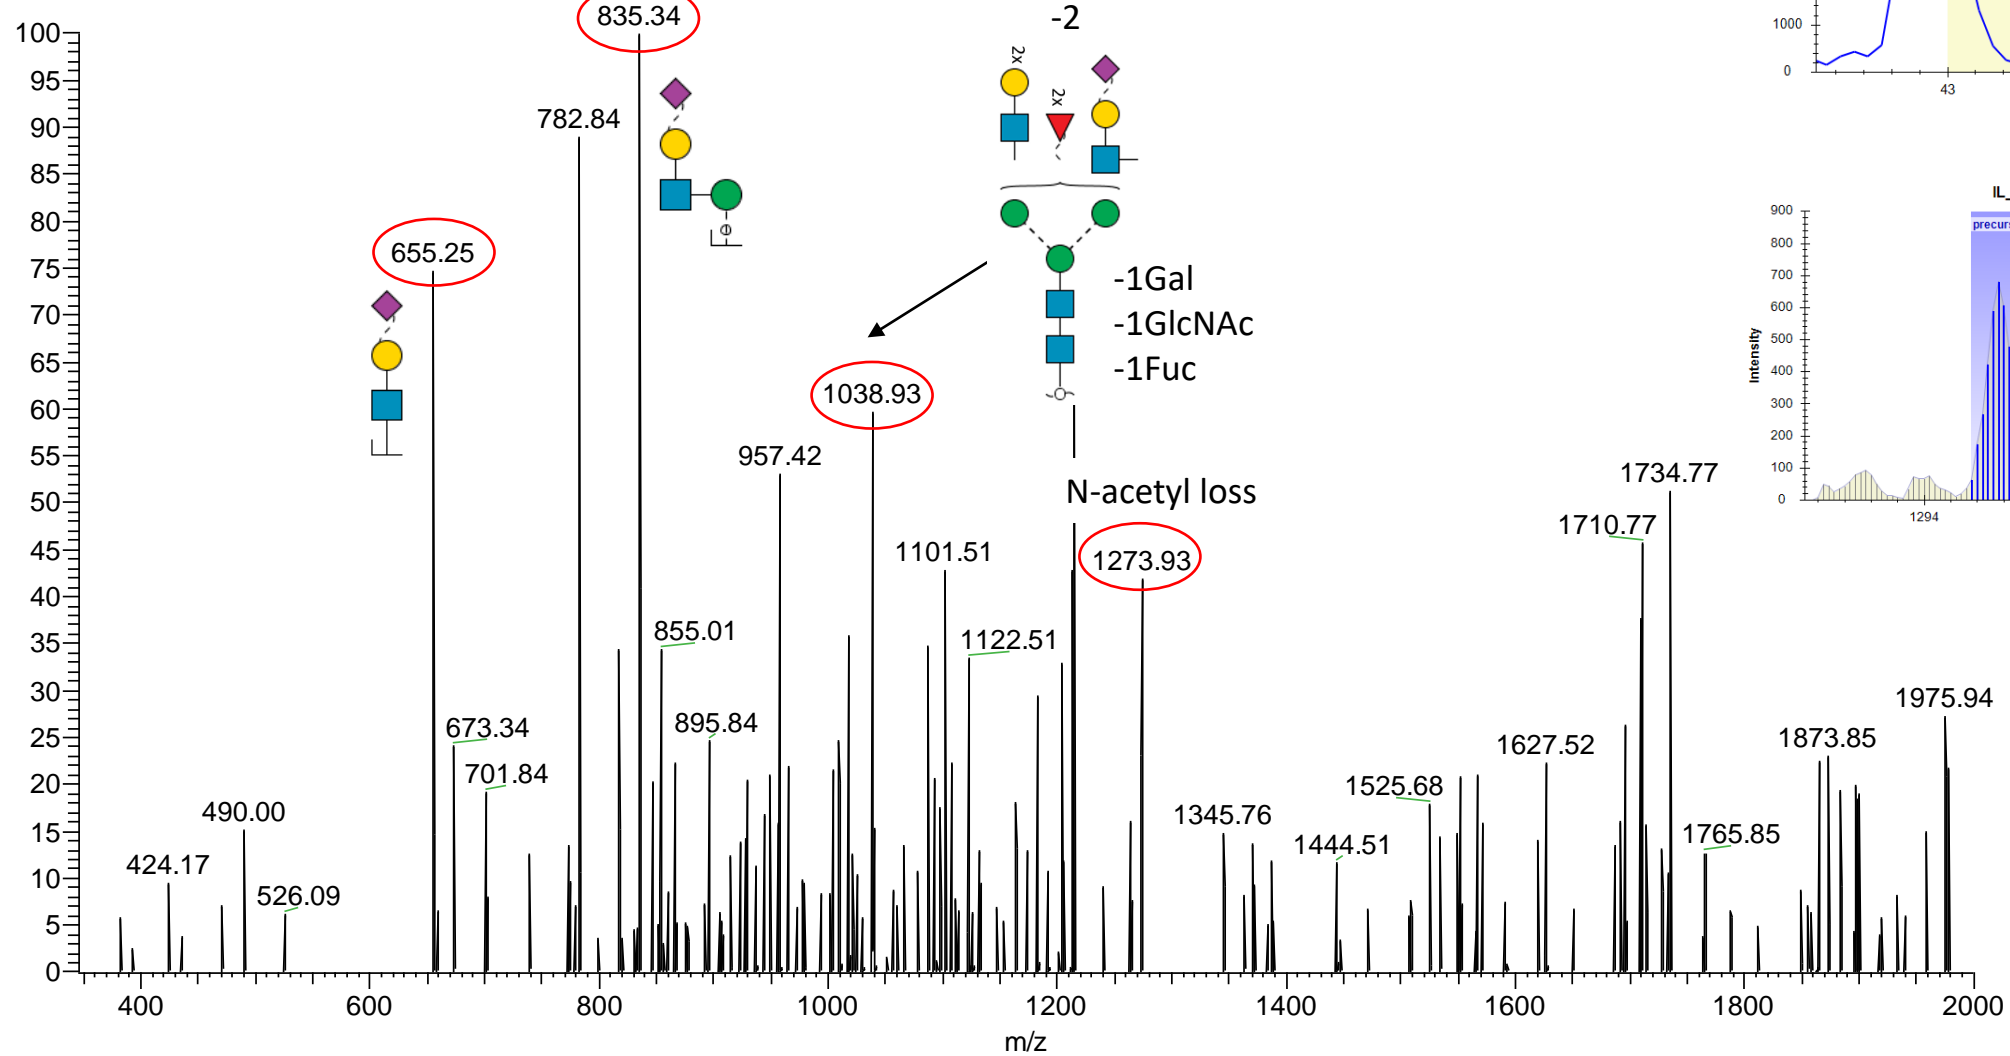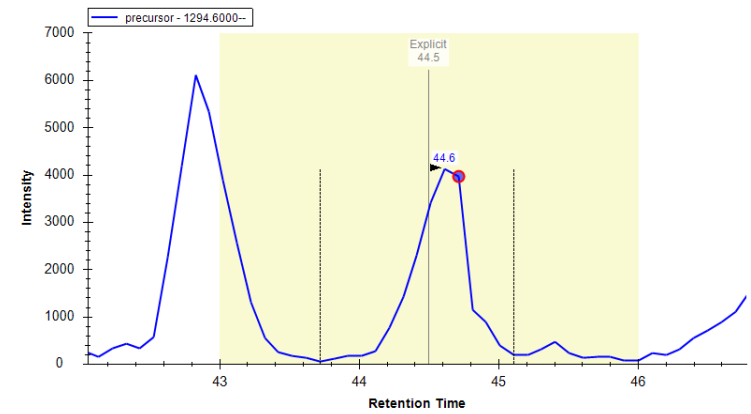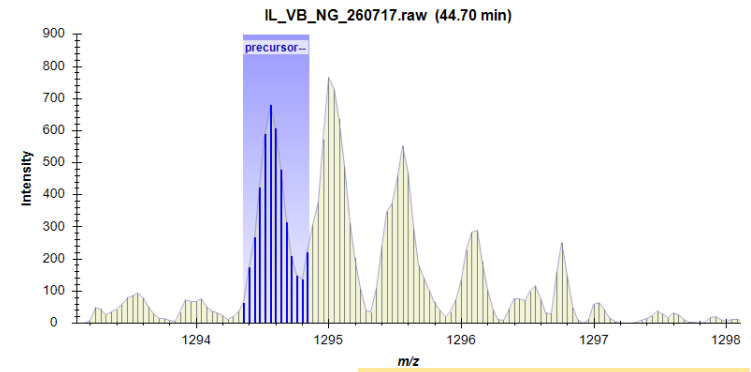

Note: Due to the lack of other isomers, this glycan is annotated with an unknown sialyl linkage isomer. Since there is no sign of core fucosylation, this structure has been annotated as being antenna fucosylated.

# Glycan #37d

Complex

Hex<sub>3</sub>HexNAc<sub>3</sub>NeuAc<sub>1</sub>Fuc<sub>2</sub> + Hex<sub>3</sub>HexNAc<sub>2</sub>

*m/z*: 1294.6 (2-)

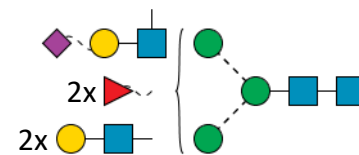

IL\_VB\_NG\_260717 #4678 RT: 47.05 AV: 1 NL: 1.54E1  
F: ITMS - p ESI d Full ms2 1294.56@cid35.00 [345.00-]

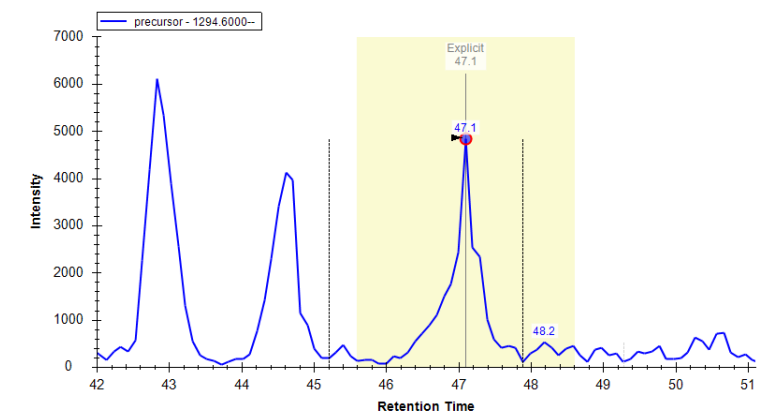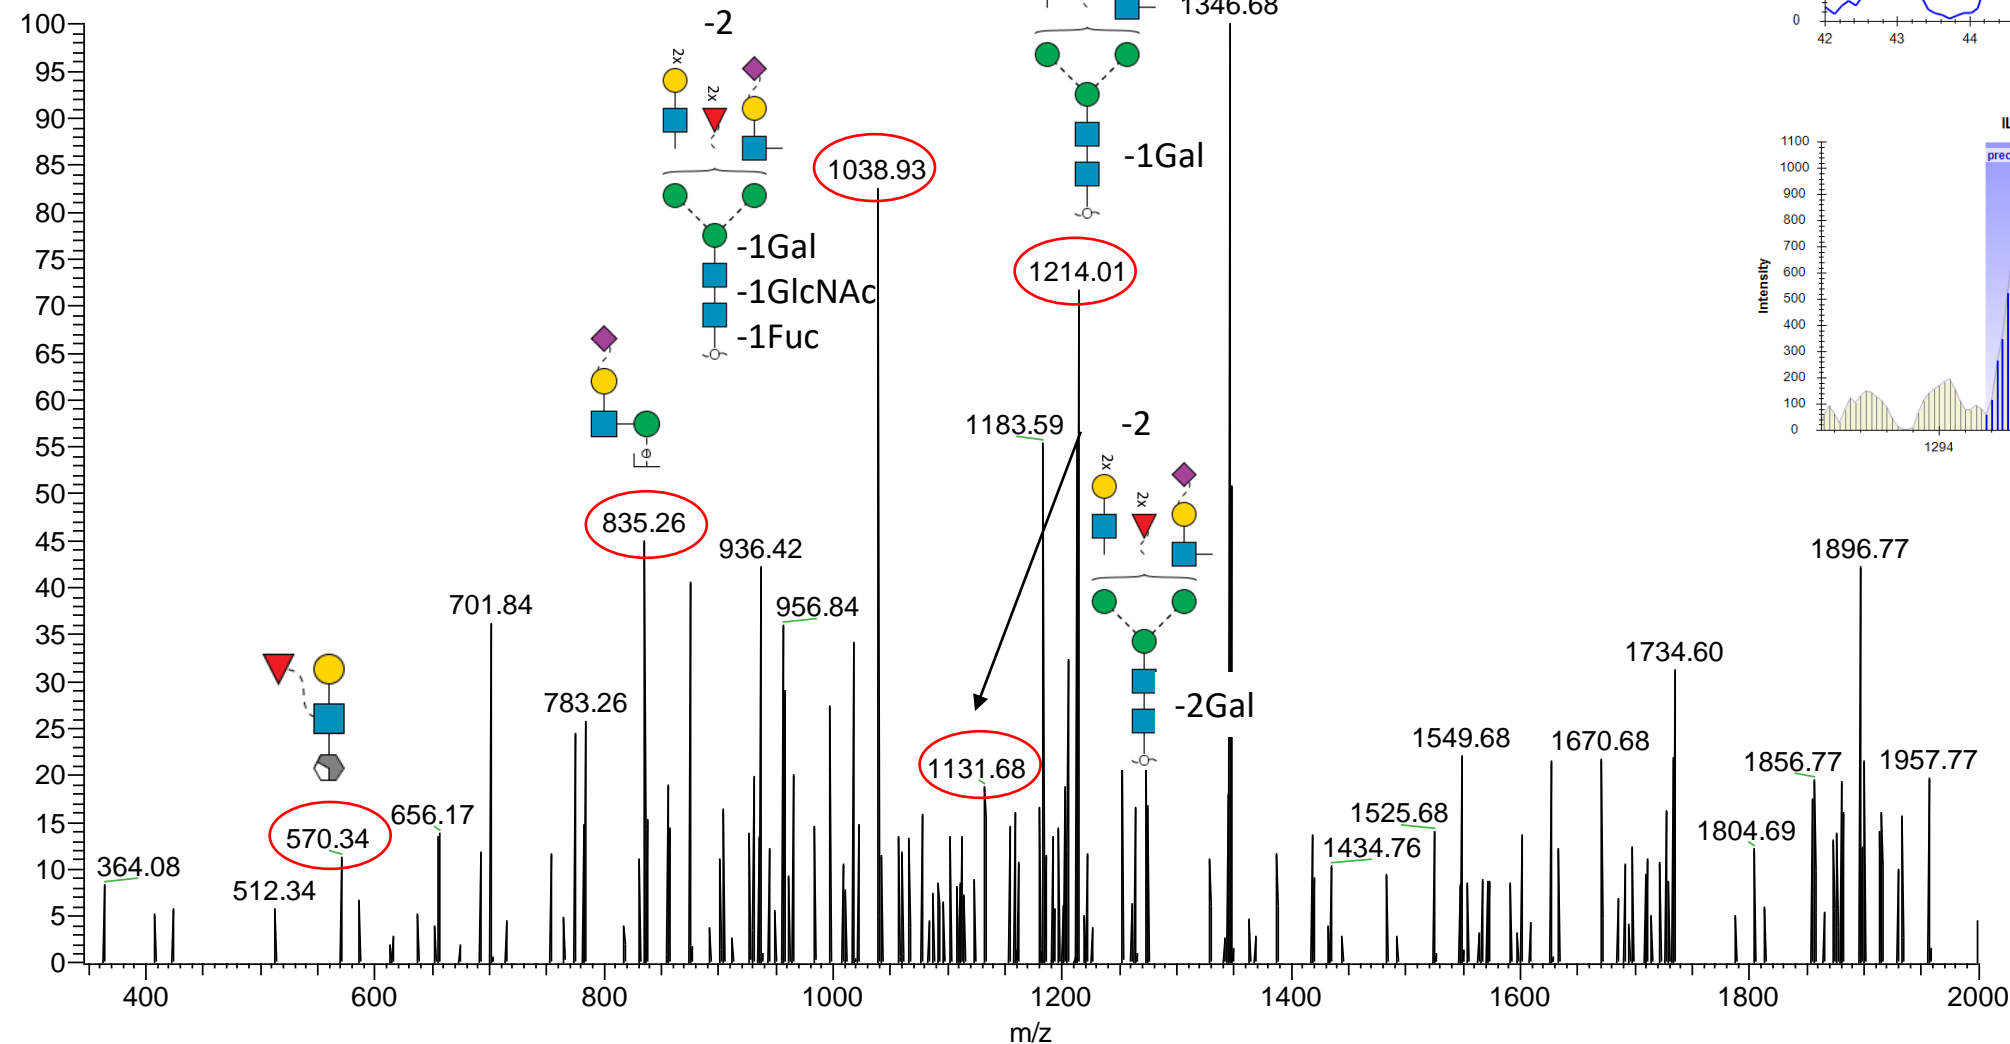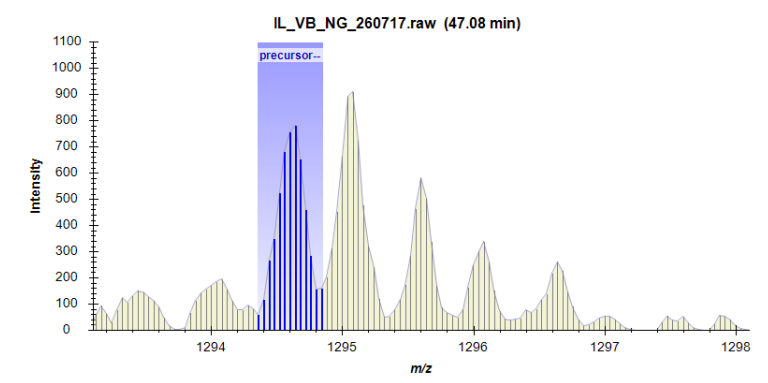

Note: Due to the lack of other isomers, this glycan is annotated with an unknown sialyl linkage isomer. Since there is no sign of core fucosylation, this structure has been annotated as being antenna fucosylated.

# Glycan #38

Complex

Hex<sub>3</sub>HexNAc<sub>3</sub>NeuAc<sub>2</sub>Fuc<sub>1</sub> + Hex<sub>3</sub>HexNAc<sub>2</sub>

*m/z*: 1367.0<sup>(2-)</sup>

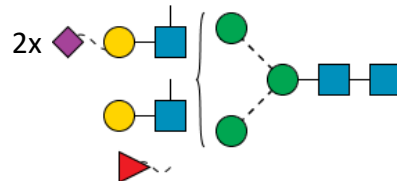

IL\_VB\_NG\_260717 #4897 RT: 49.33 AV: 1 NL: 1.16E1

F: ITMS - p ESI d Full ms2 1367.08@cid35.00 [365.00-]

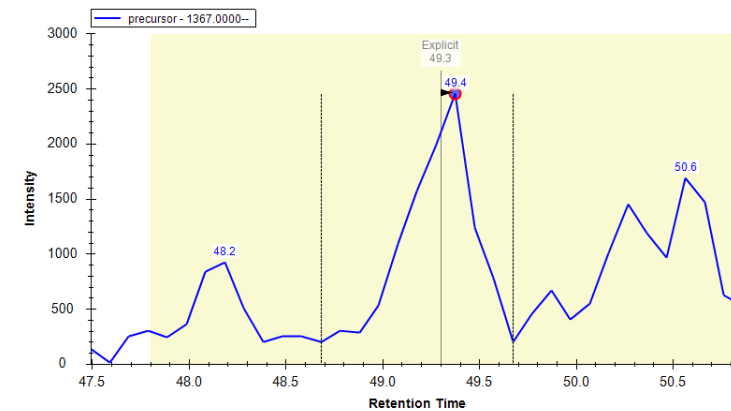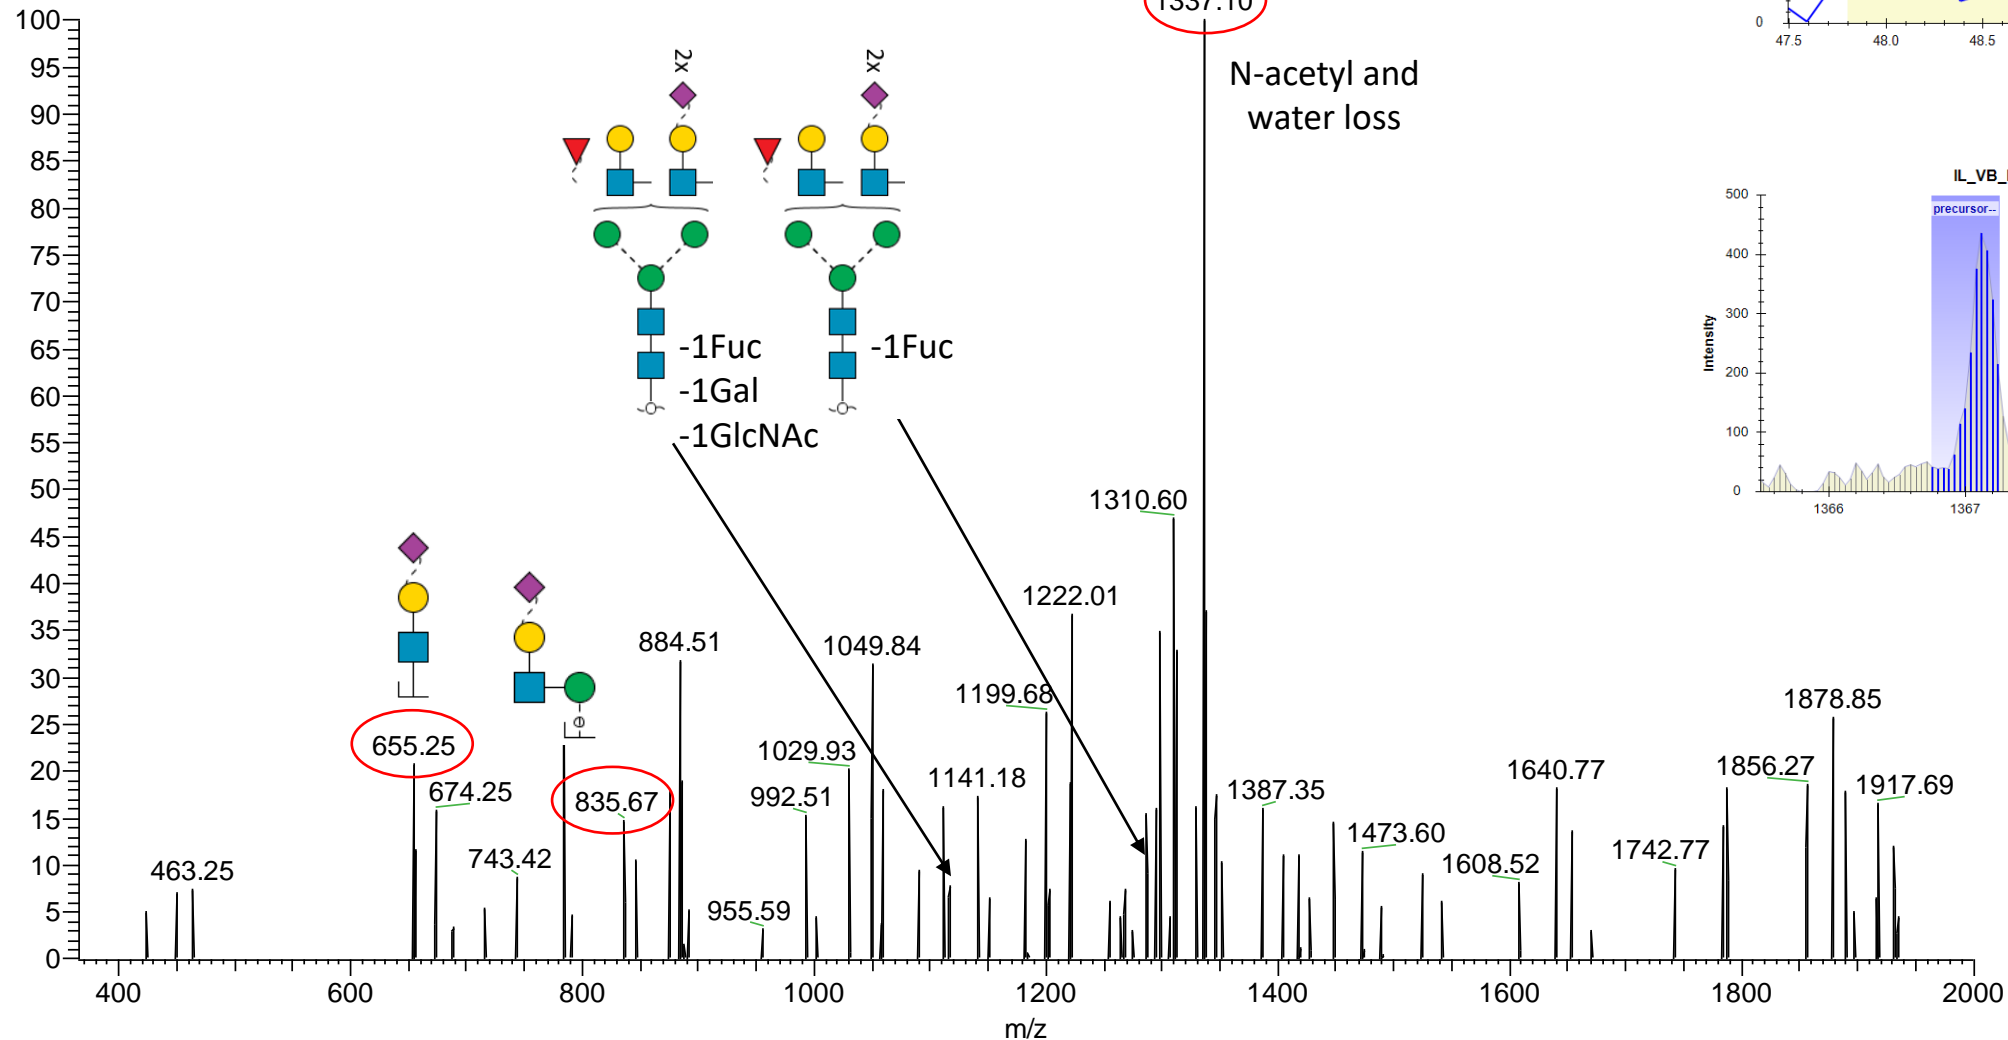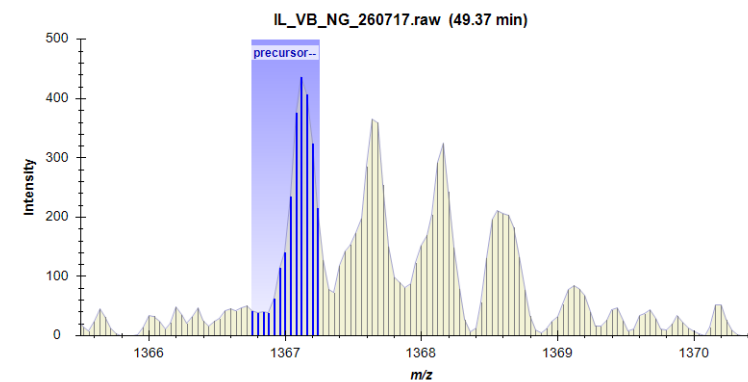

Note: Due to the lack of robust fragment ions, this glycan is annotated without sialyl linkage isomer information. No indication of core fucose.

# Glycan #39a

## Complex

Hex<sub>3</sub>HexNAc<sub>3</sub>NeuAc<sub>1</sub>Fuc<sub>3</sub> + Hex<sub>3</sub>HexNAc<sub>2</sub>

*m/z*: 1367.5 (2-)

IL\_XB\_NG\_260717 #4334 RT: 43.52 AV: 1 NL: 1.82E1

F: ITMS - p ESI d Full ms2 1367.59@cid35.00 [365.00-;

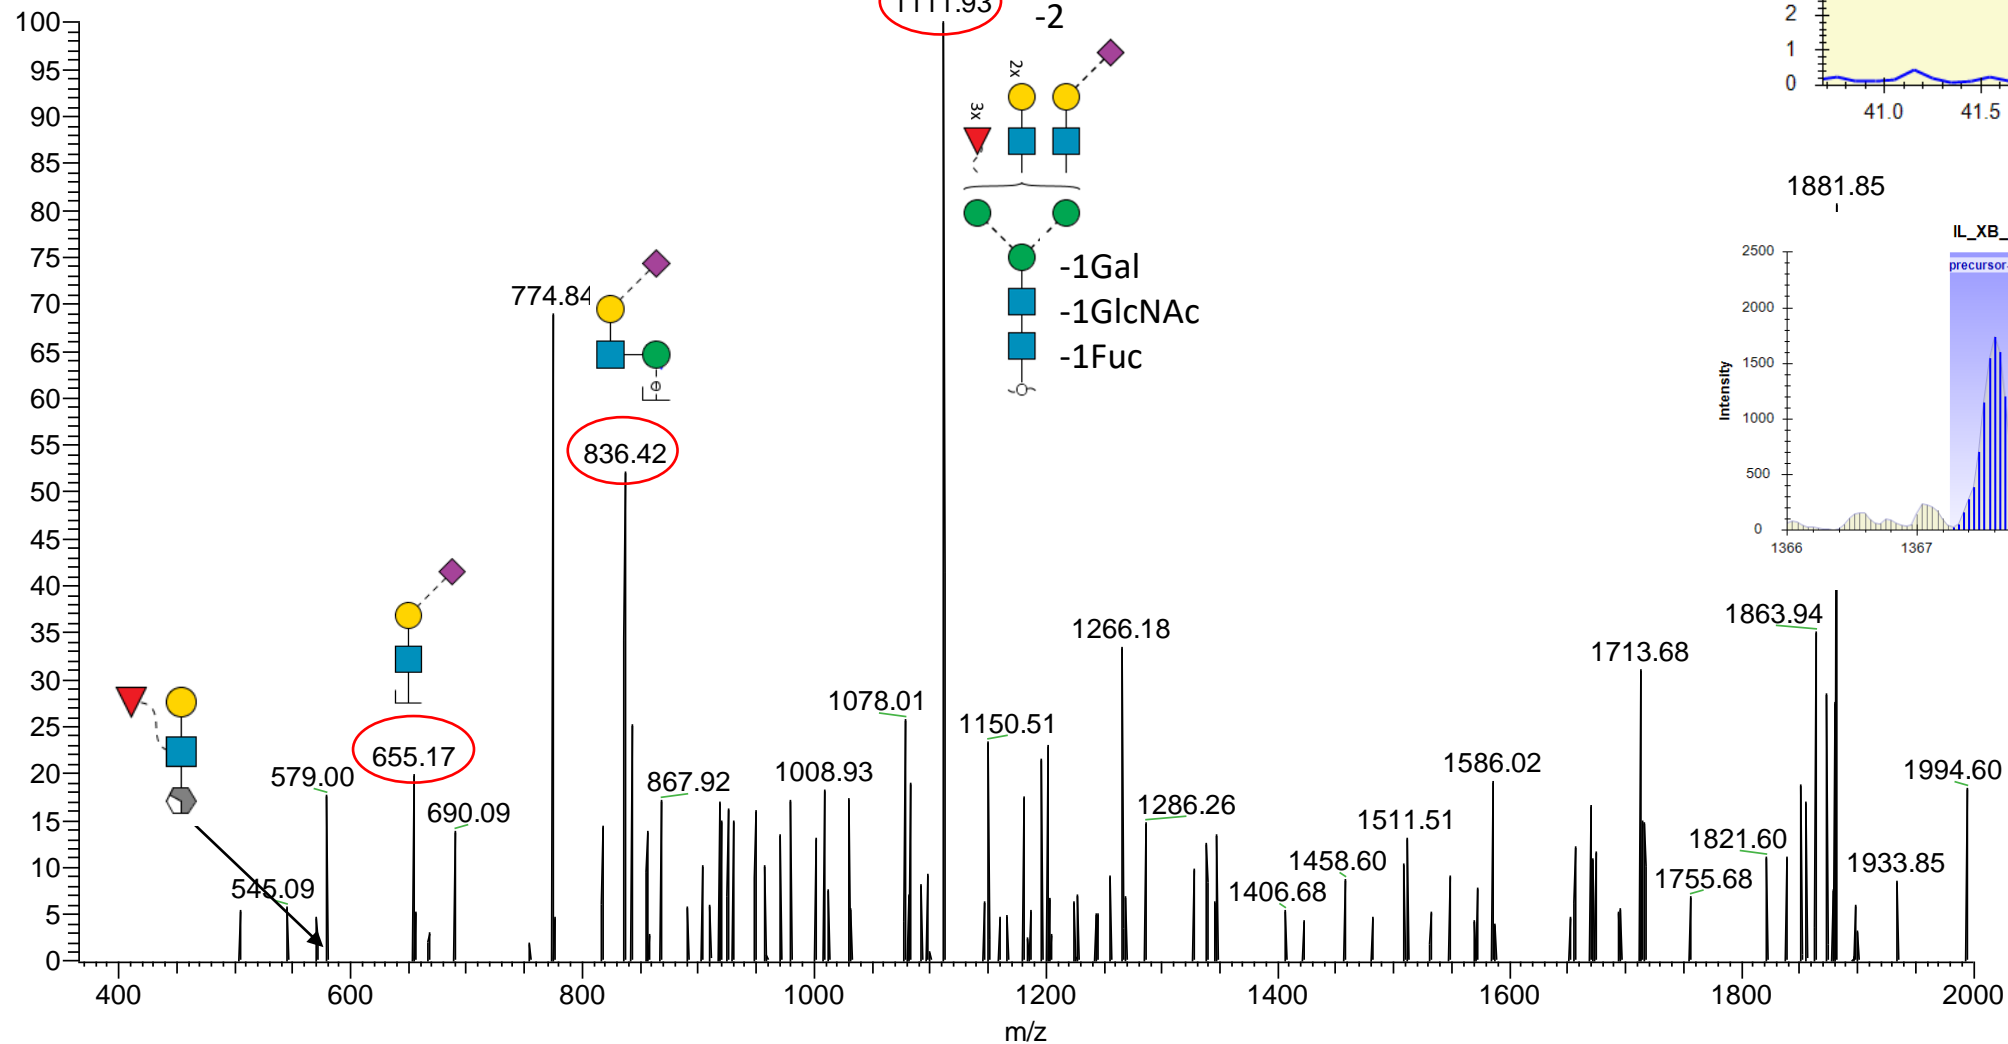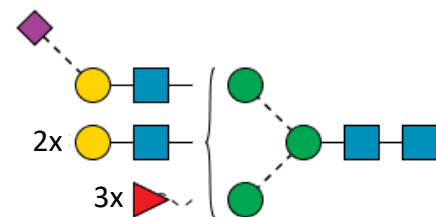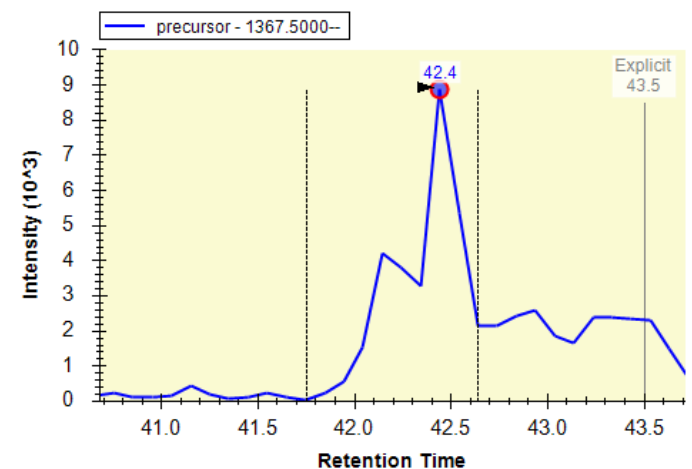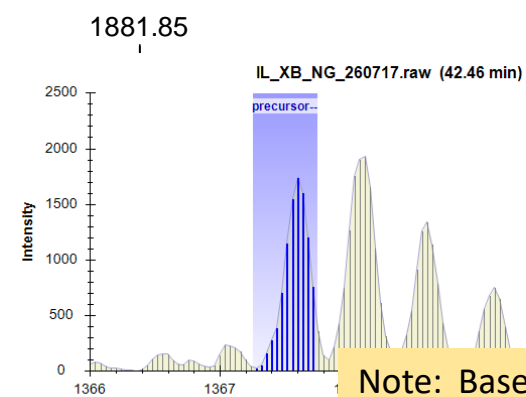

Note: Based on the early PGC-LC elution pattern, this glycan is annotated as the  $\alpha$ 2,6-sialyl linkage isomer. Due to the lack of robust fragment ions, this glycan is otherwise annotated without sialyl linkage isomer information.

# Glycan #39b

Complex

Hex<sub>3</sub>HexNAc<sub>3</sub>NeuAc<sub>1</sub>Fuc<sub>3</sub> + Hex<sub>3</sub>HexNAc<sub>2</sub>

*m/z*: 1367.5 (2-)

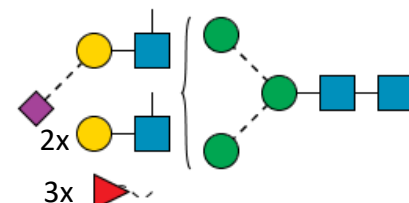

IL\_XB\_NG\_260717 #4602 RT: 46.31 AV: 1 NL: 3.02E2

F: ITMS - p ESI d Full ms2 1367.59@cid35.00 [365.00-]

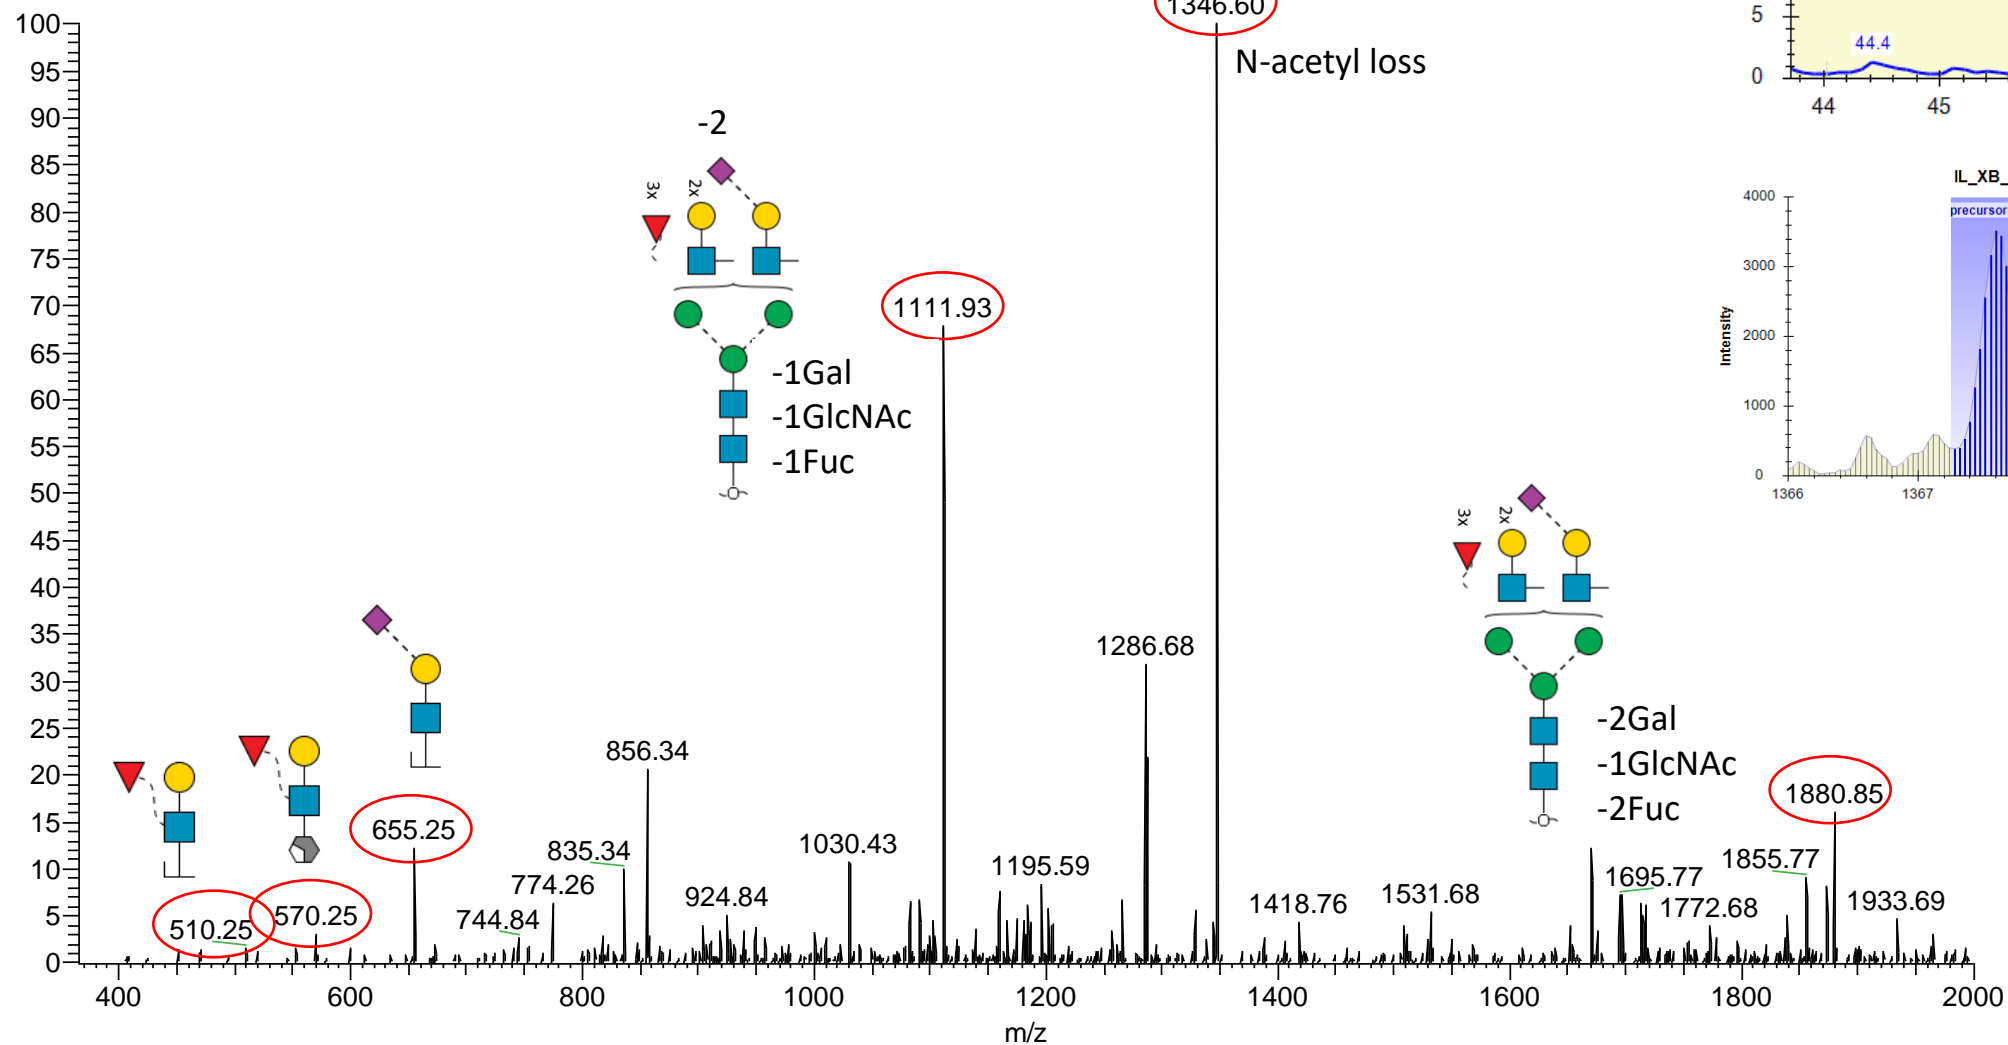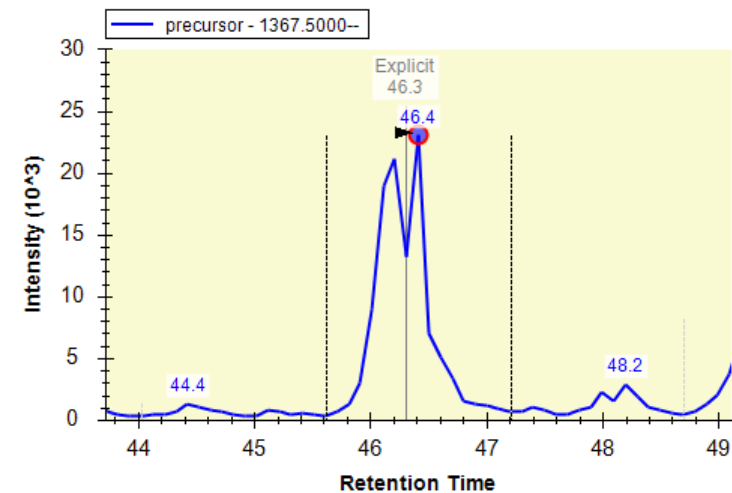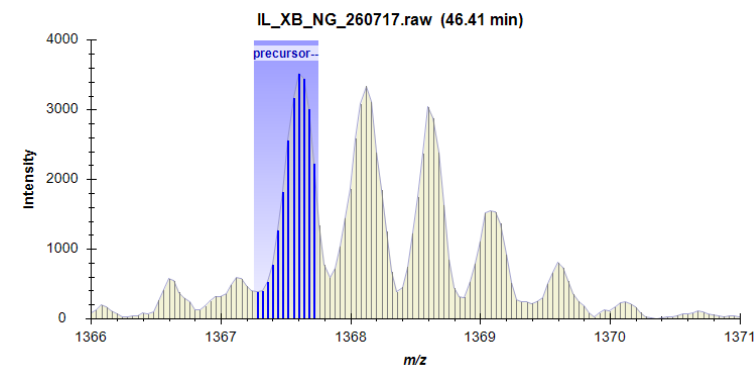

Note: Based on the PGC-LC elution pattern, this glycan is annotated as the  $\alpha$ 2,3-sialyl linkage isomer. Due to the lack of robust fragment ions, this glycan is otherwise annotated without sialyl linkage isomer information.



# Glycan #40a

Complex

Hex<sub>4</sub>HexNAc<sub>4</sub>NeuAc<sub>1</sub> + Hex<sub>3</sub>HexNAc<sub>2</sub>Fuc<sub>1</sub>

*m/z*: 1404.0<sup>(2-)</sup>

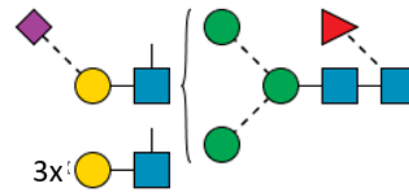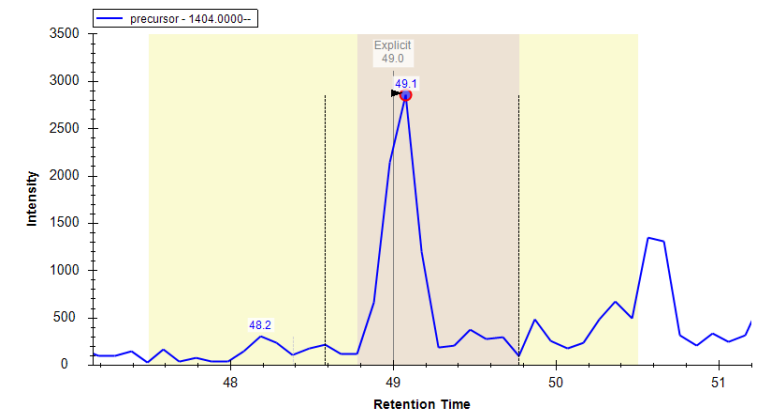

IL\_VB\_NG\_260717 #4876 RT: 49.11 AV: 1 NL: 3.07E1  
F: ITMS - p ESI d Full ms2 1404.15@cid35.00 [375.00-;

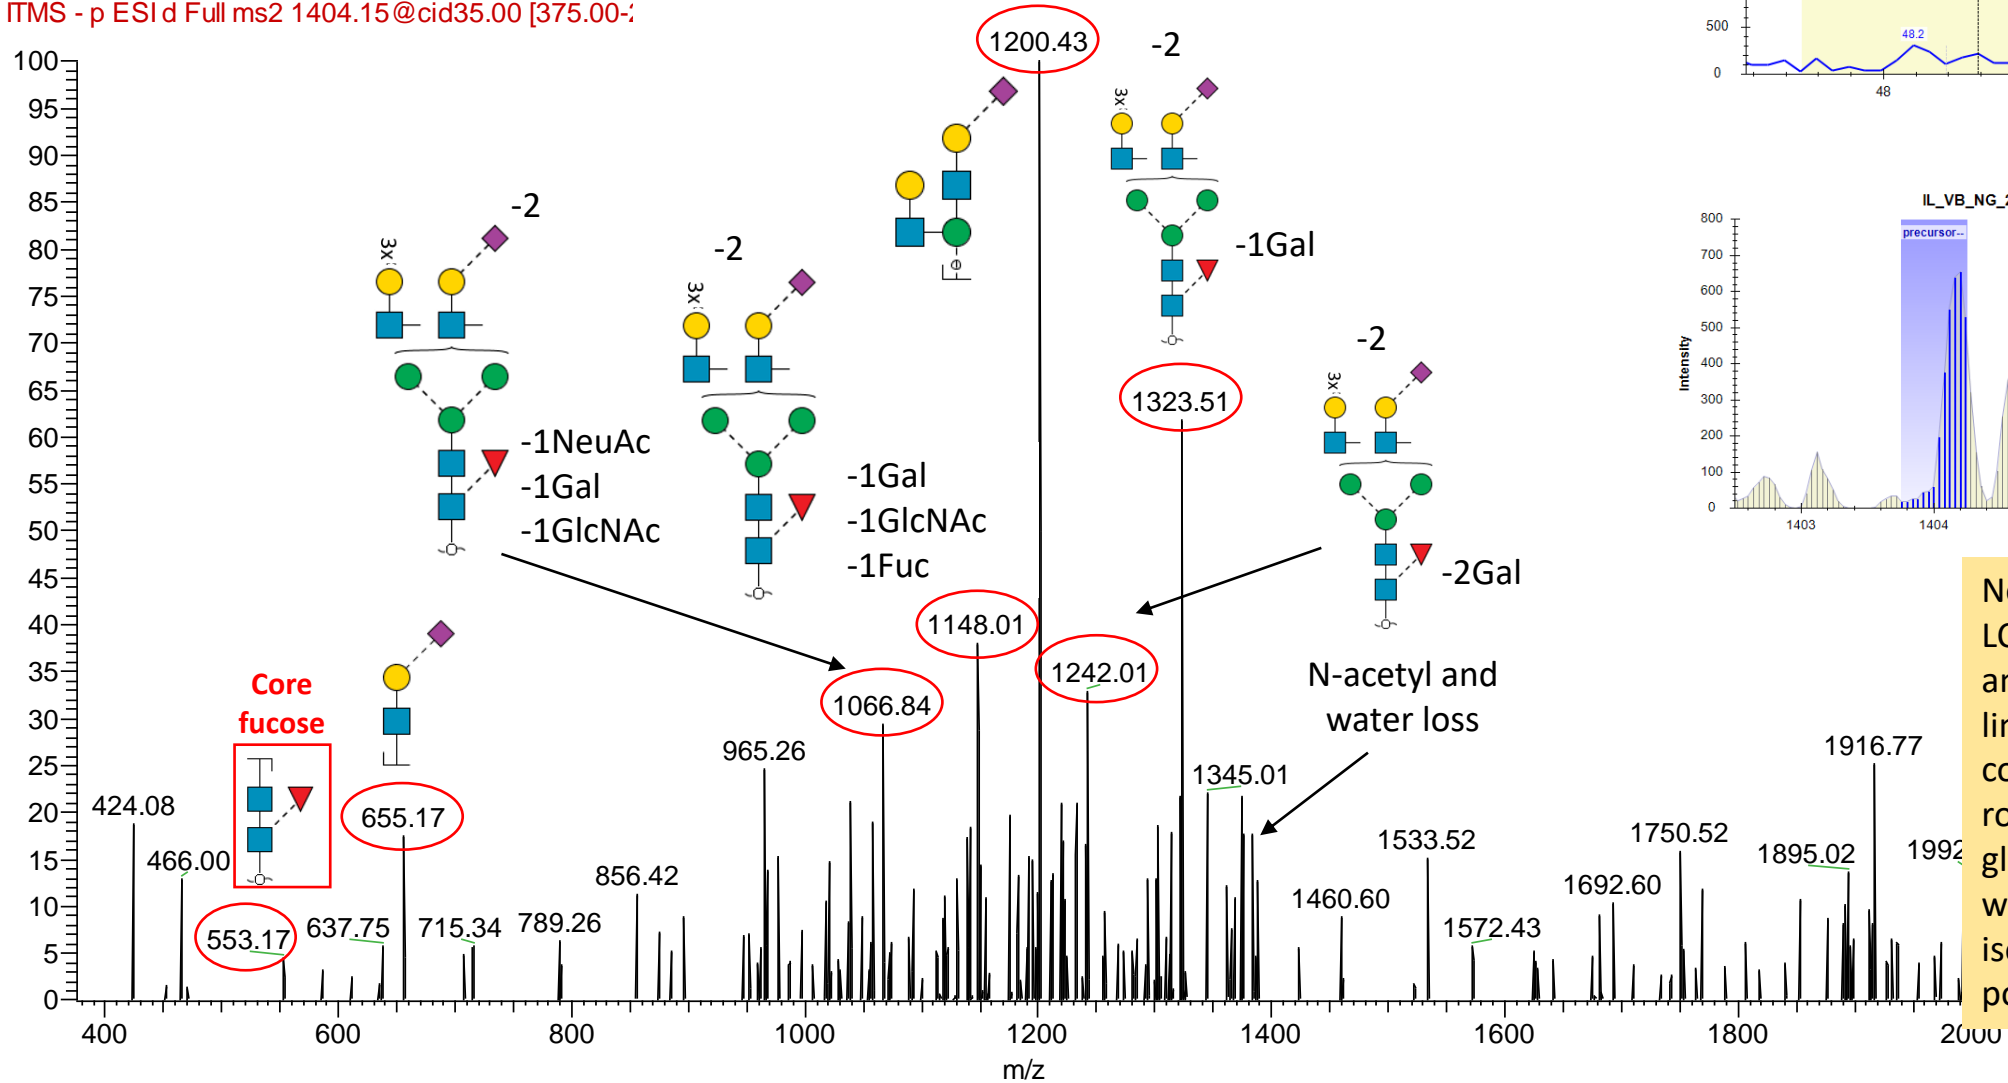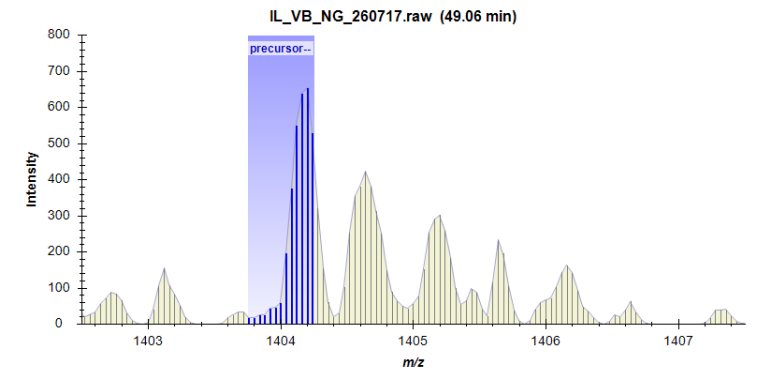

Note: Based on the early PGC-LC elution, this glycan is annotated as the  $\alpha$ 2,6-sialyl linkage isomer. Indication of core fucose. Due to the lack of robust fragment ions, this glycan is otherwise annotated without known sialyl linkage isomer information and fucose position.

# Glycan #40b

## Complex

Hex<sub>4</sub>HexNAc<sub>4</sub>NeuAc<sub>1</sub> + Hex<sub>3</sub>HexNAc<sub>2</sub>Fuc<sub>1</sub>

*m/z*: 1404.0 (2-)

IL\_XB\_NG\_260717 #5093 RT: 51.49 AV: 1 NL: 2.94E1  
F: ITMS - p ESI d Full ms2 1404.16@cid35.00 [375.00-:

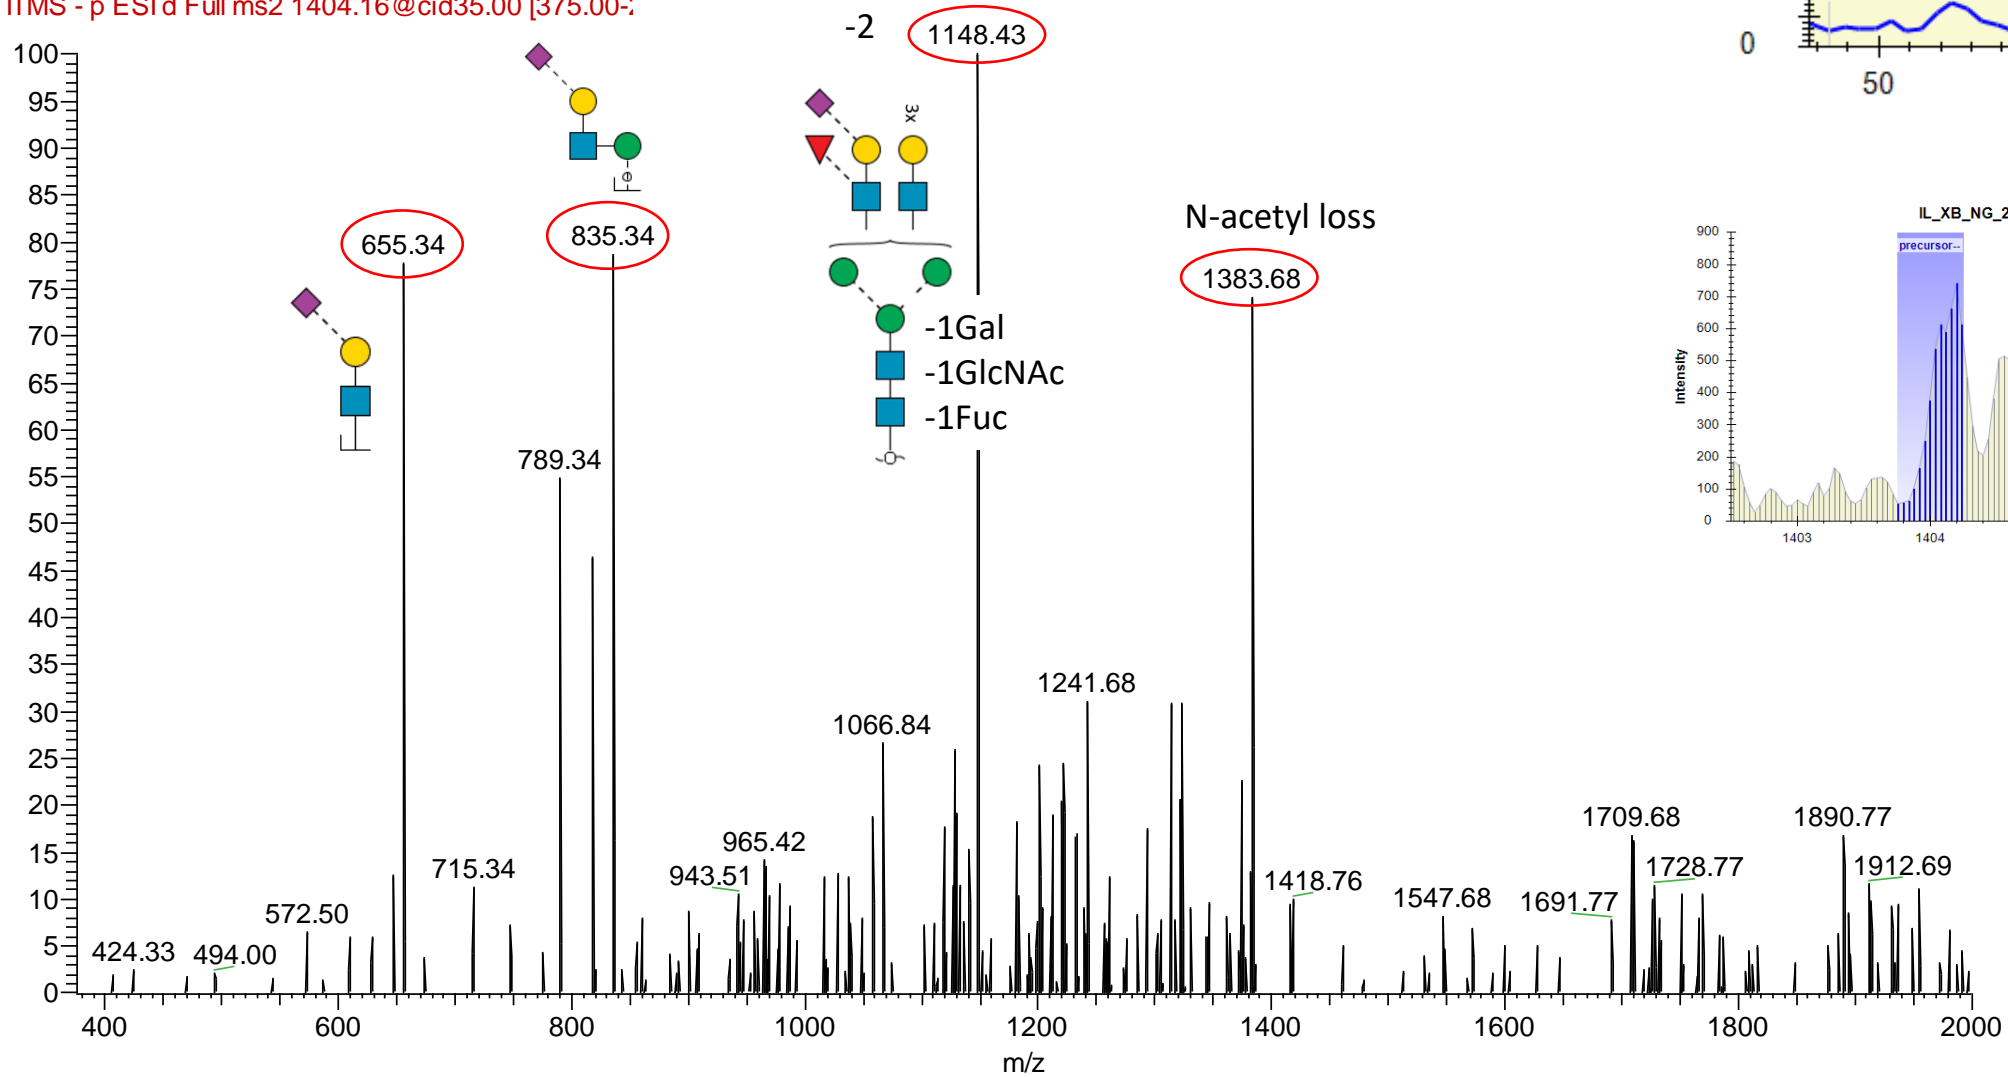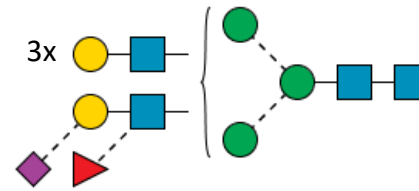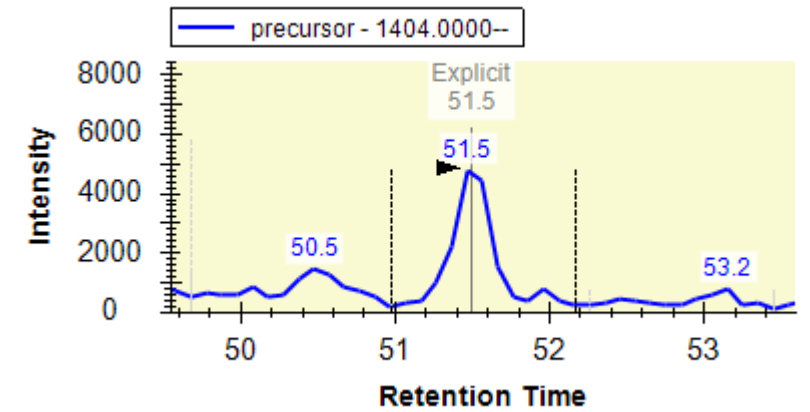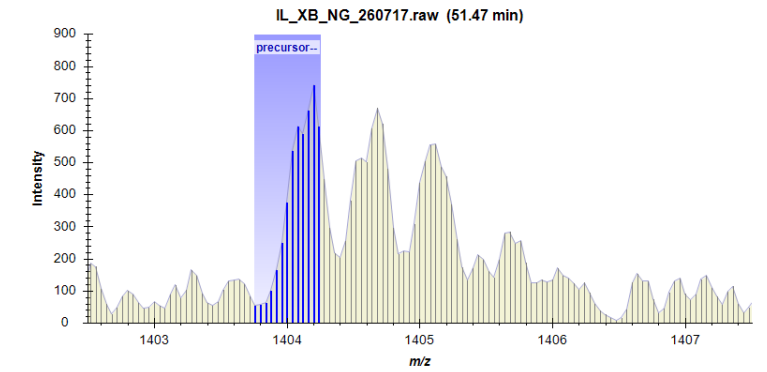

Note: No indication of core fucose. Based on retention time this structure is therefore annotated as antenna fucosylated with alpha2,3-sialylated. The exact antennary fucosyl linkage(s) (here drawn as alpha1,3) remains undetermined.

# Glycan #41a

Complex

Hex<sub>4</sub>HexNAc<sub>4</sub>NeuAc<sub>1</sub>Fuc<sub>2</sub> + Hex<sub>3</sub>HexNAc<sub>2</sub>

*m/z*: 1477.0 (2-)

IL\_XB\_NG\_260717 #4755 RT: 47.93 AV: 1 NL: 2.99E1  
 F: ITMS - p ESI d Full ms2 1477.15@cid35.00 [395.00-;

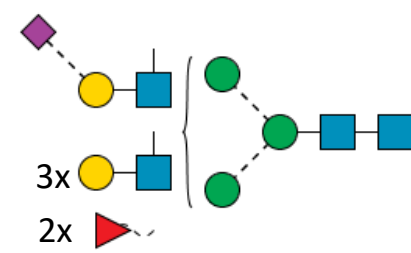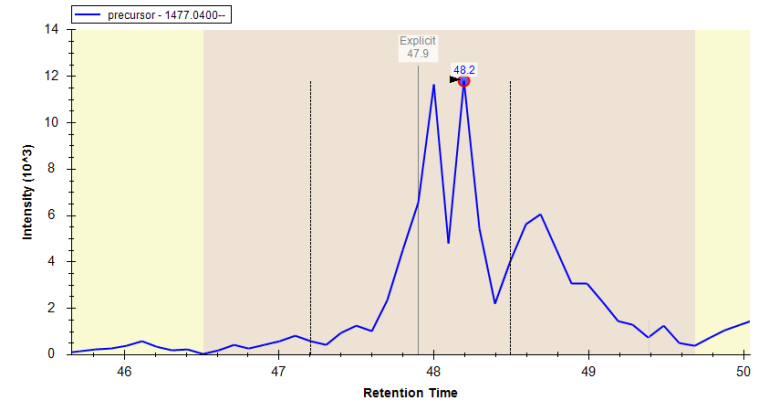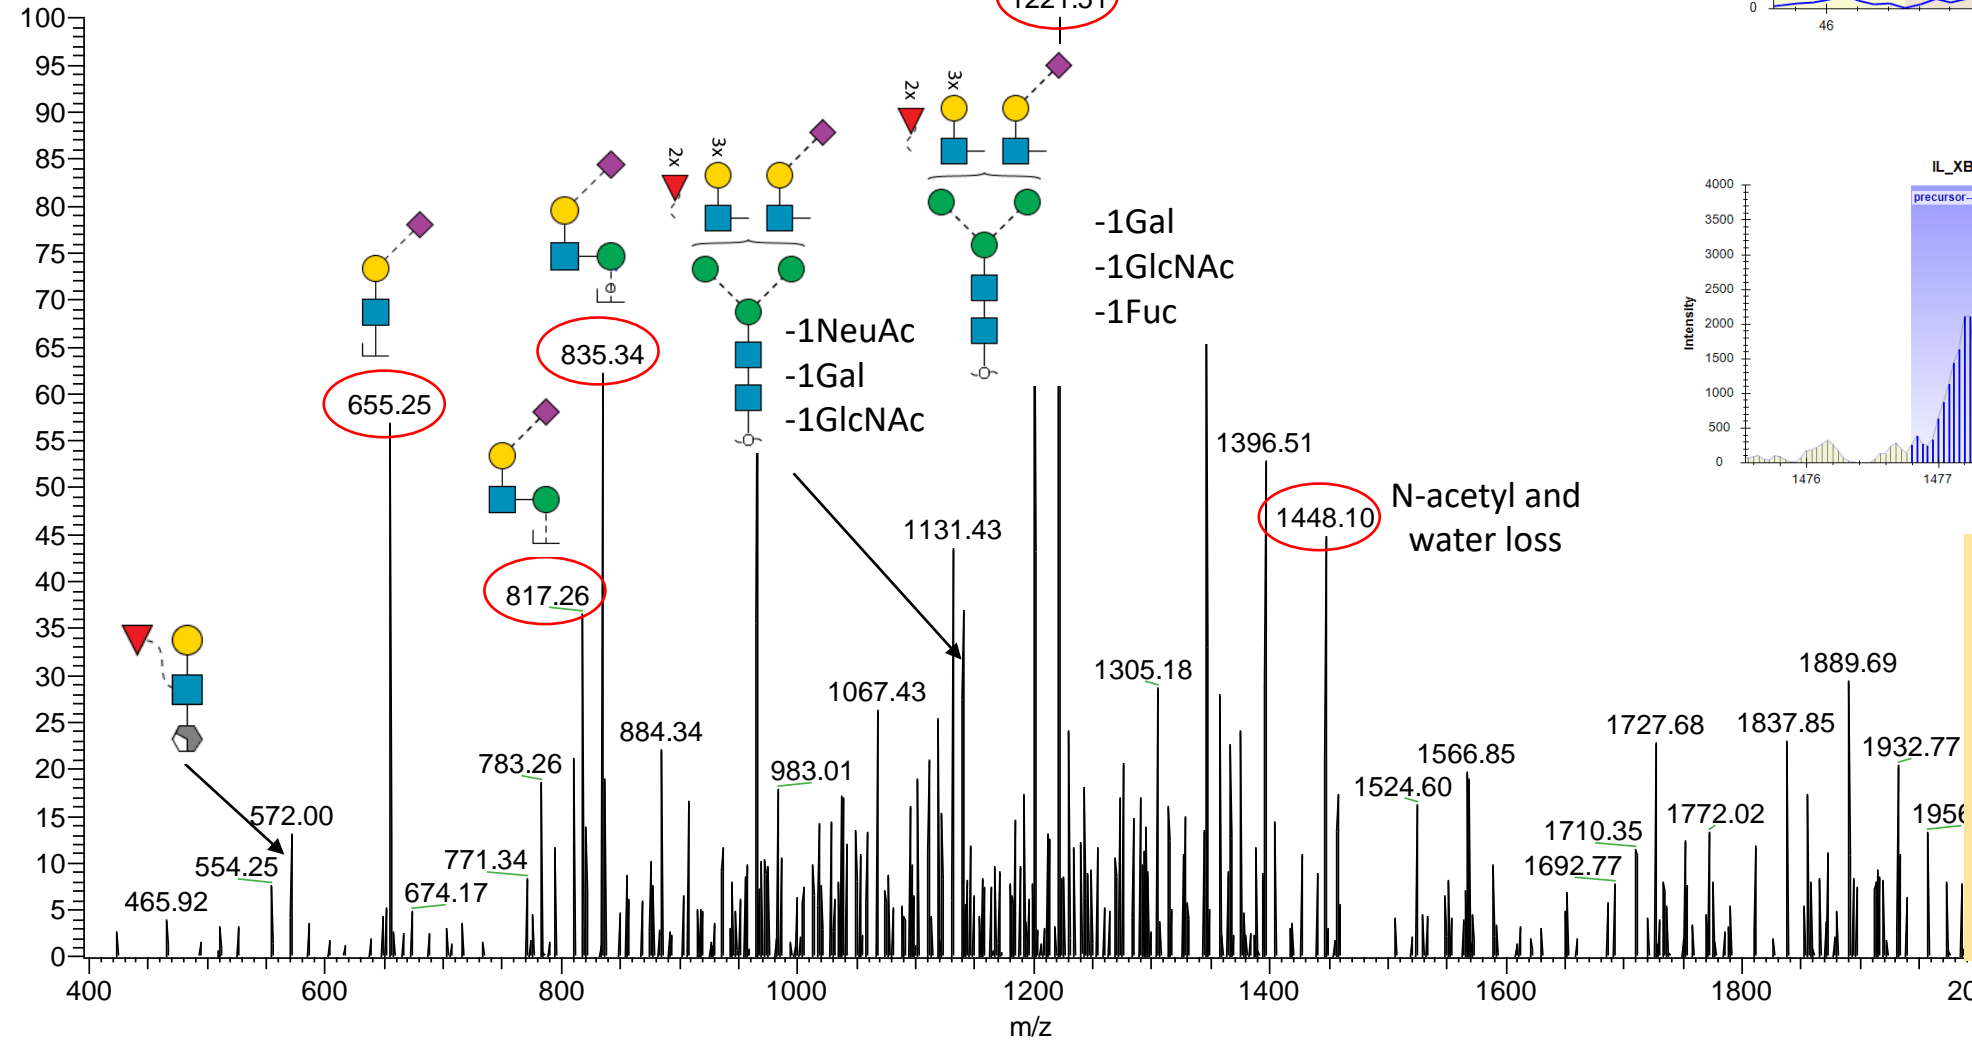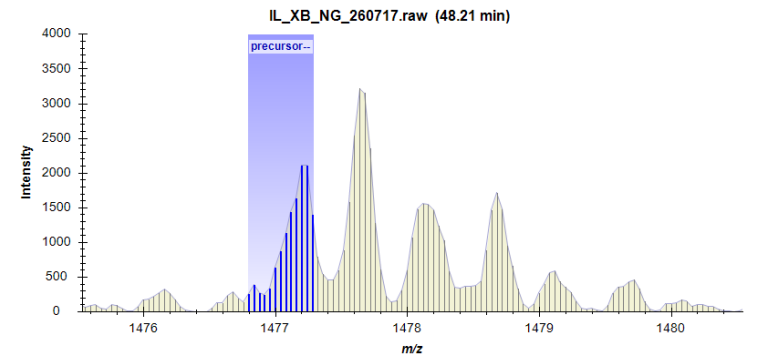

Note: Based on PGC-LC elution pattern, this glycan is annotated as the α2,6-sialyl linkage isomer. Due to the lack of robust fragment ions, this glycan is otherwise annotated without known sialyl linkage isomer information and fucose position.

# Glycan #41b

Complex

Hex<sub>4</sub>HexNAc<sub>4</sub>NeuAc<sub>1</sub>Fuc<sub>2</sub> + Hex<sub>3</sub>HexNAc<sub>2</sub>

*m/z*: 1477.0<sup>(2-)</sup>

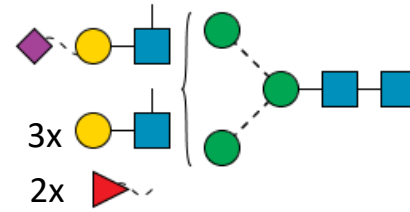

IL\_XB\_NG\_260717 #4810 RT: 48.52 AV: 1 NL: 2.22E1  
F: ITMS - p ESI d Full ms2 1477.15@cid35.00 [395.00-;

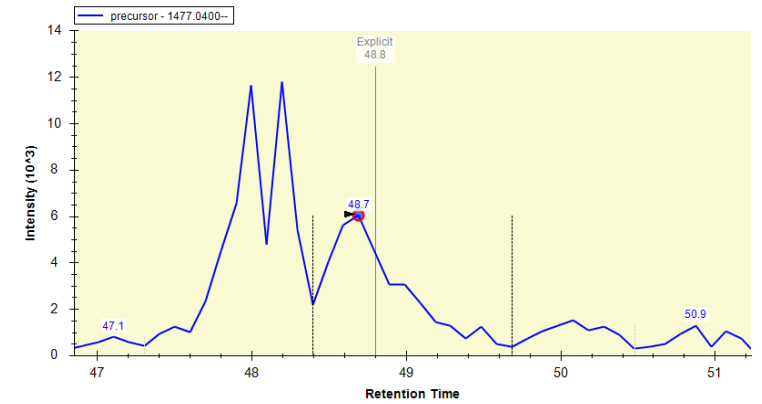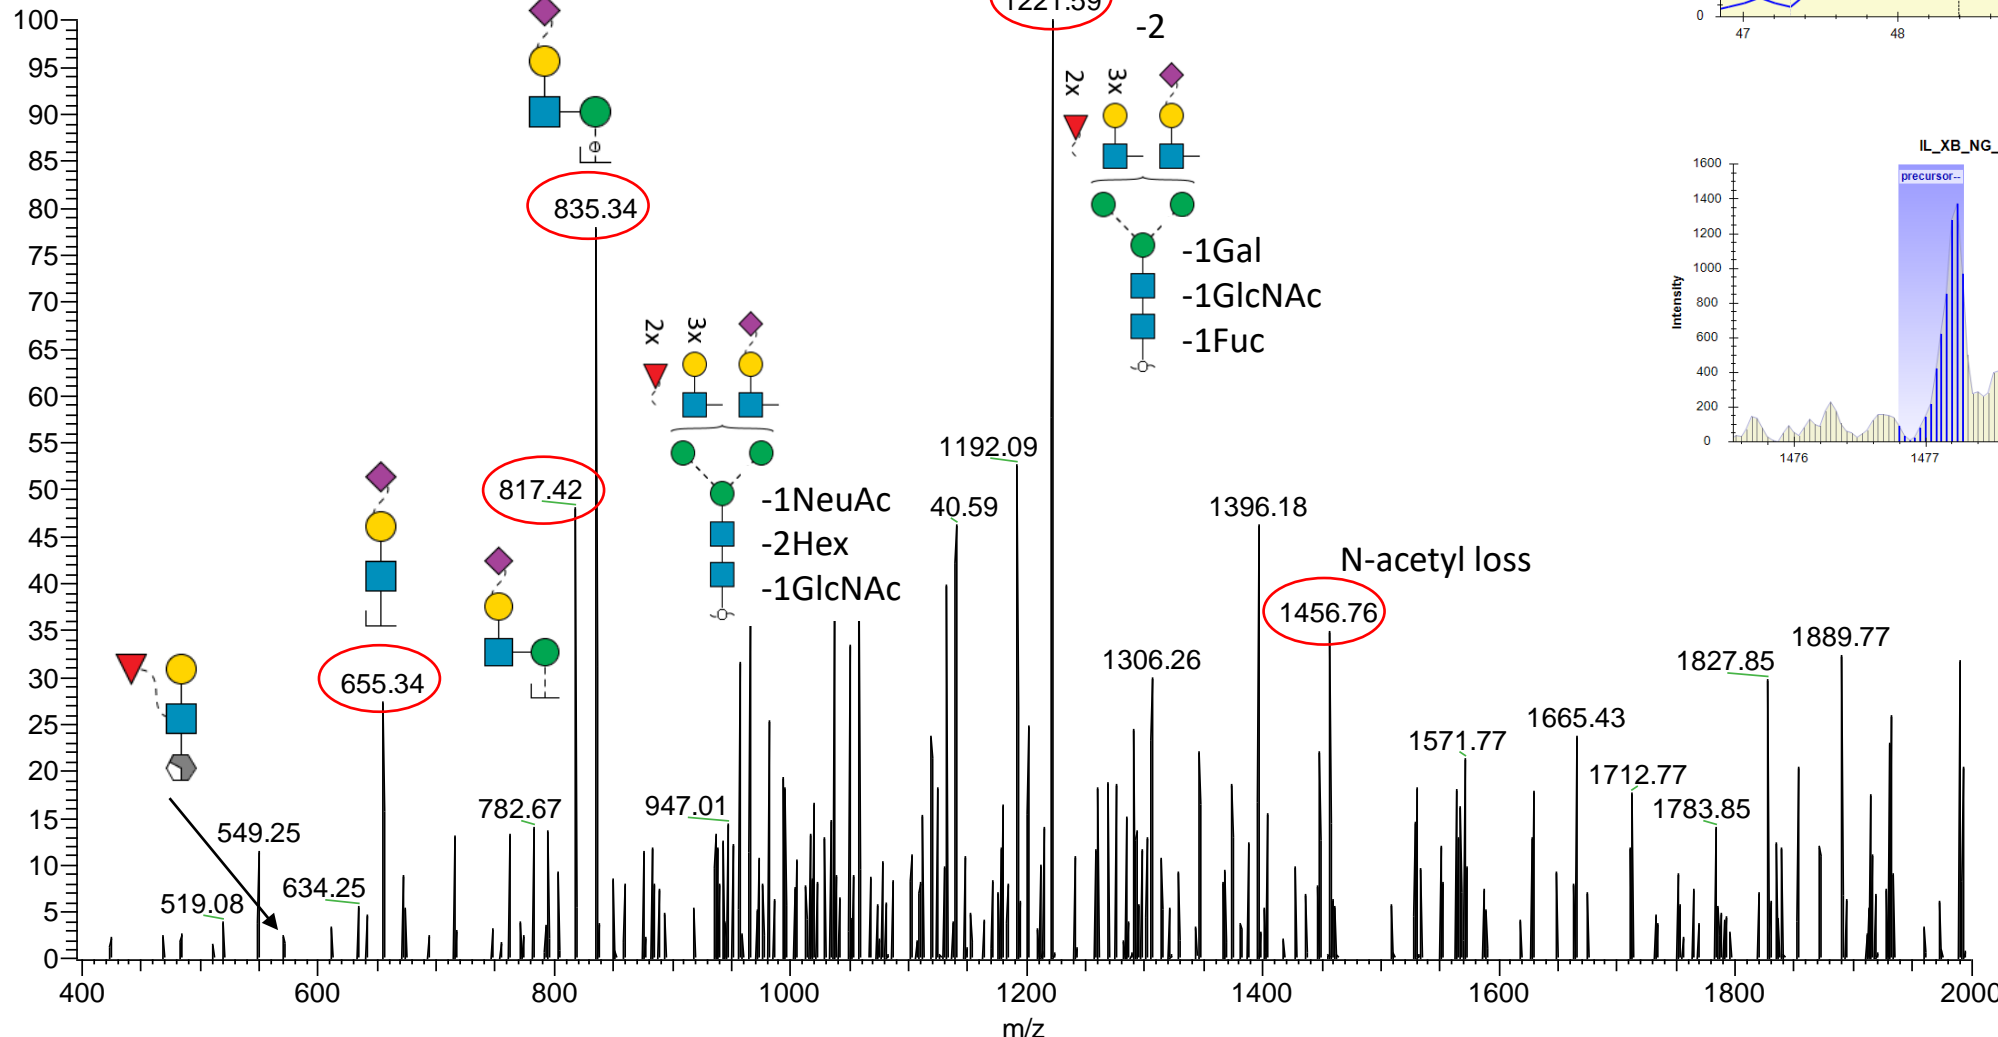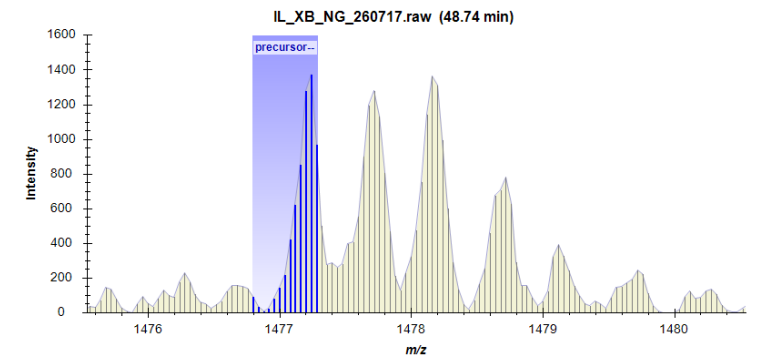

Note: Due to the lack of robust fragment ions, this glycan is annotated without known sialyl linkage isomer information and fucose position.

# Glycan #42

## Complex

Hex<sub>3</sub>HexNAc<sub>3</sub> NeuAc<sub>3</sub>Fuc<sub>1</sub>+ Hex<sub>3</sub>HexNAc<sub>2</sub>

*m/z*: 1512.5 (2-)

IL\_XB\_NG\_260717 #4790 RT: 48.31 AV: 1 NL: 2.55E1

F: ITMS - p ESI d Full ms2 1512.66@cid35.00 [405.00-;

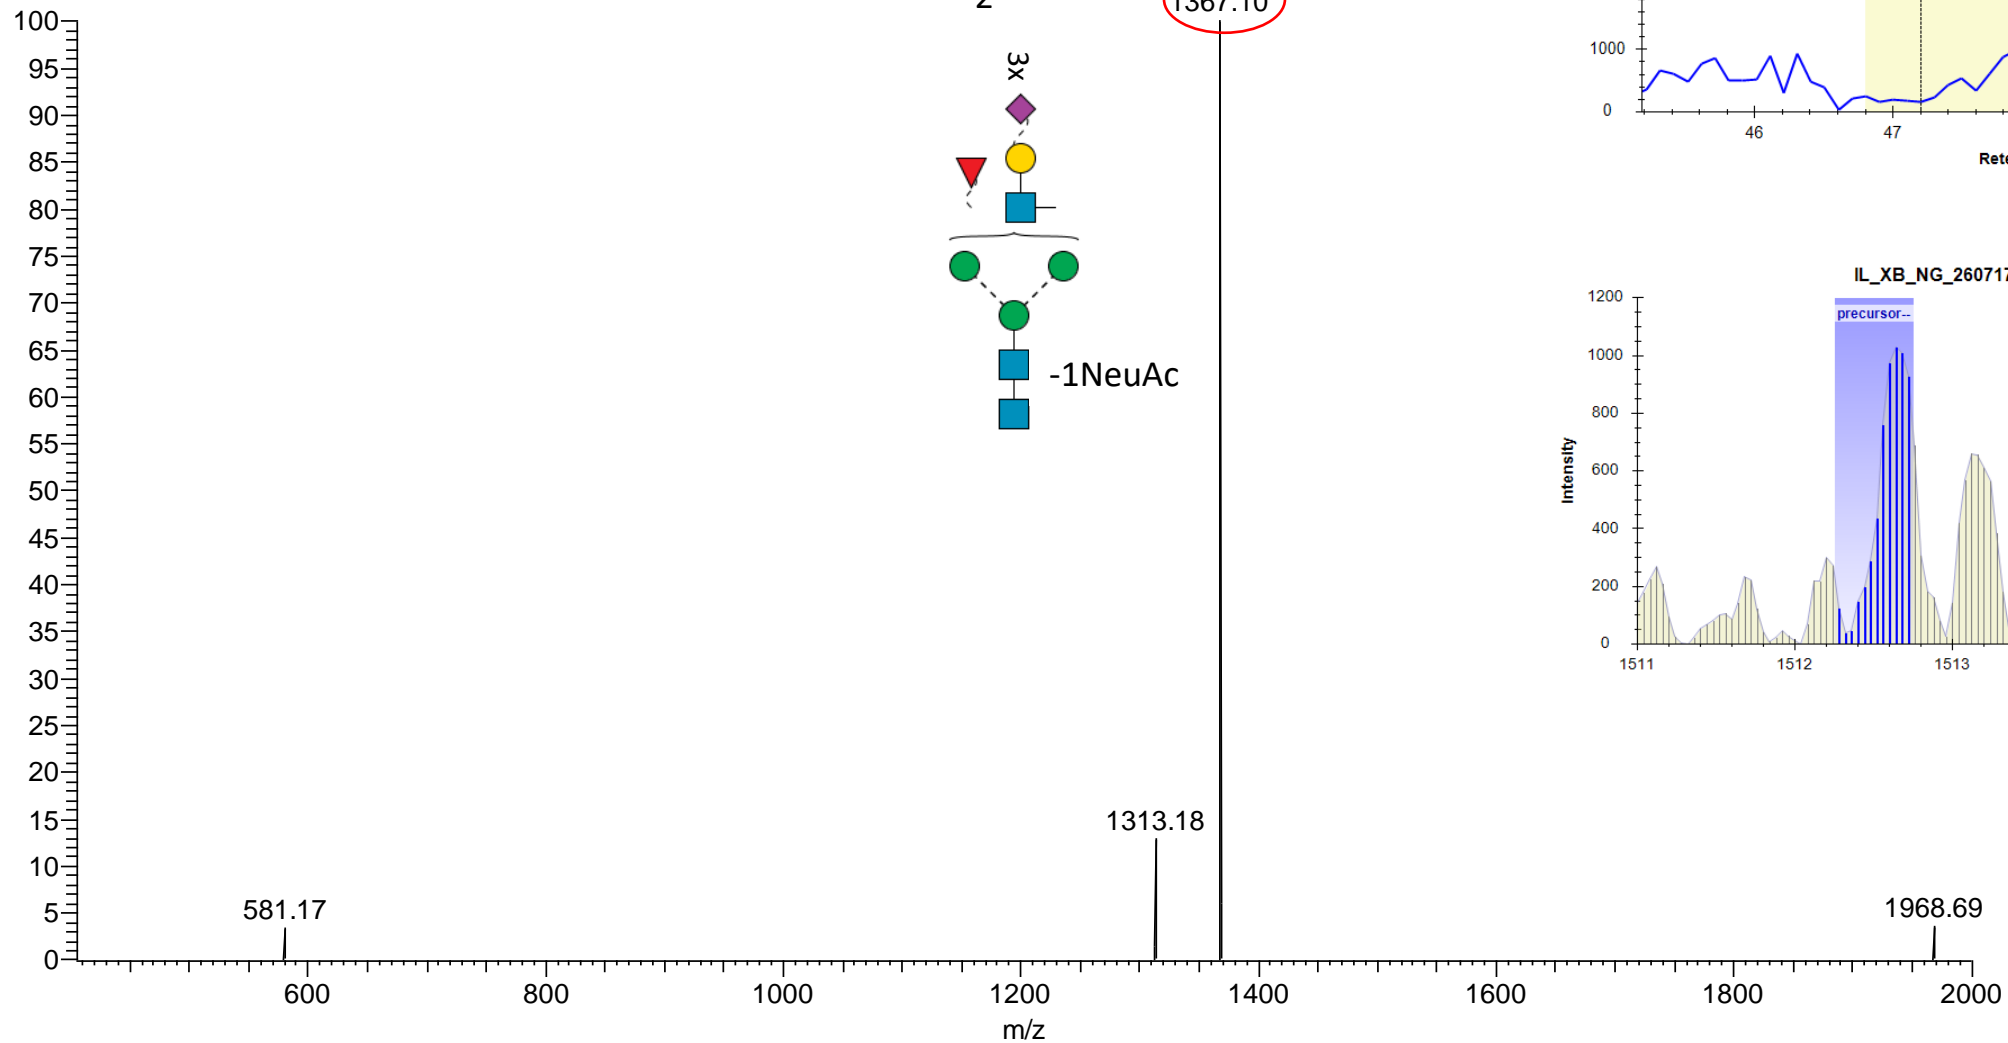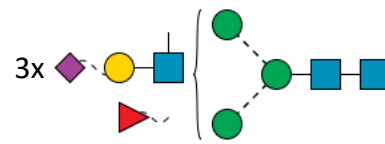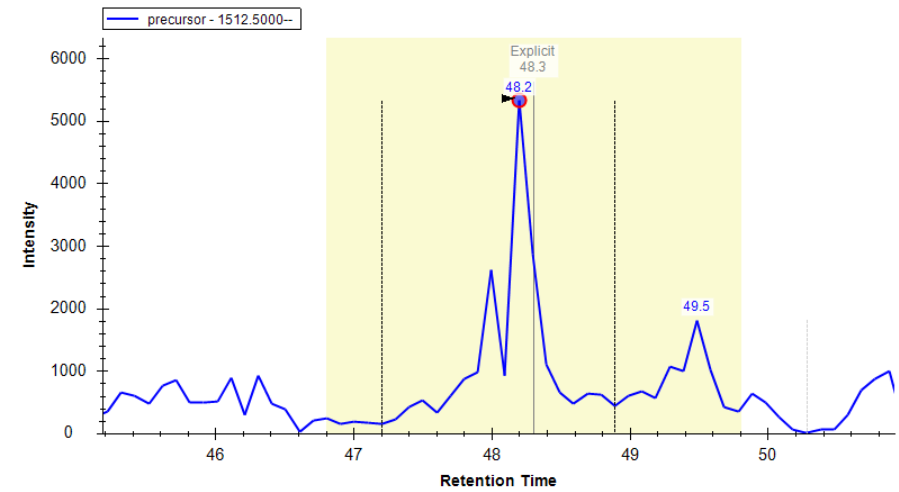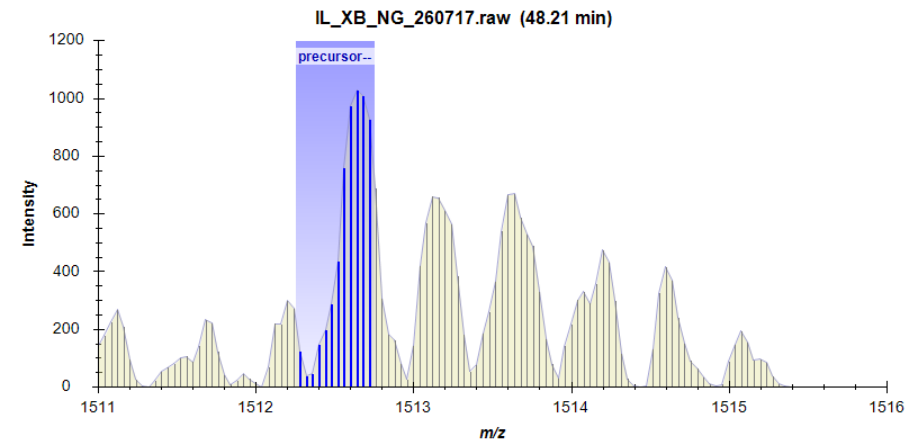

Note: Due to the lack of robust fragment ions, this glycan is annotated without known sialyl linkage isomer information and fucose position.

# Glycan #43a

Complex

Hex<sub>4</sub>HexNAc<sub>4</sub>NeuAc<sub>2</sub>Fuc<sub>1</sub>+ Hex<sub>3</sub>HexNAc<sub>2</sub>

*m/z*: 1549.7<sup>(2-)</sup>

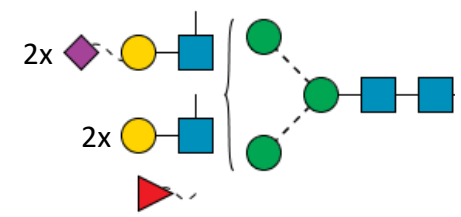

IL\_VB\_NG\_260717 #4938 RT: 49.75 AV: 1 NL: 3.50  
F: ITMS - p ESI d Full ms2 1549.69@cid35.00 [415.00-]

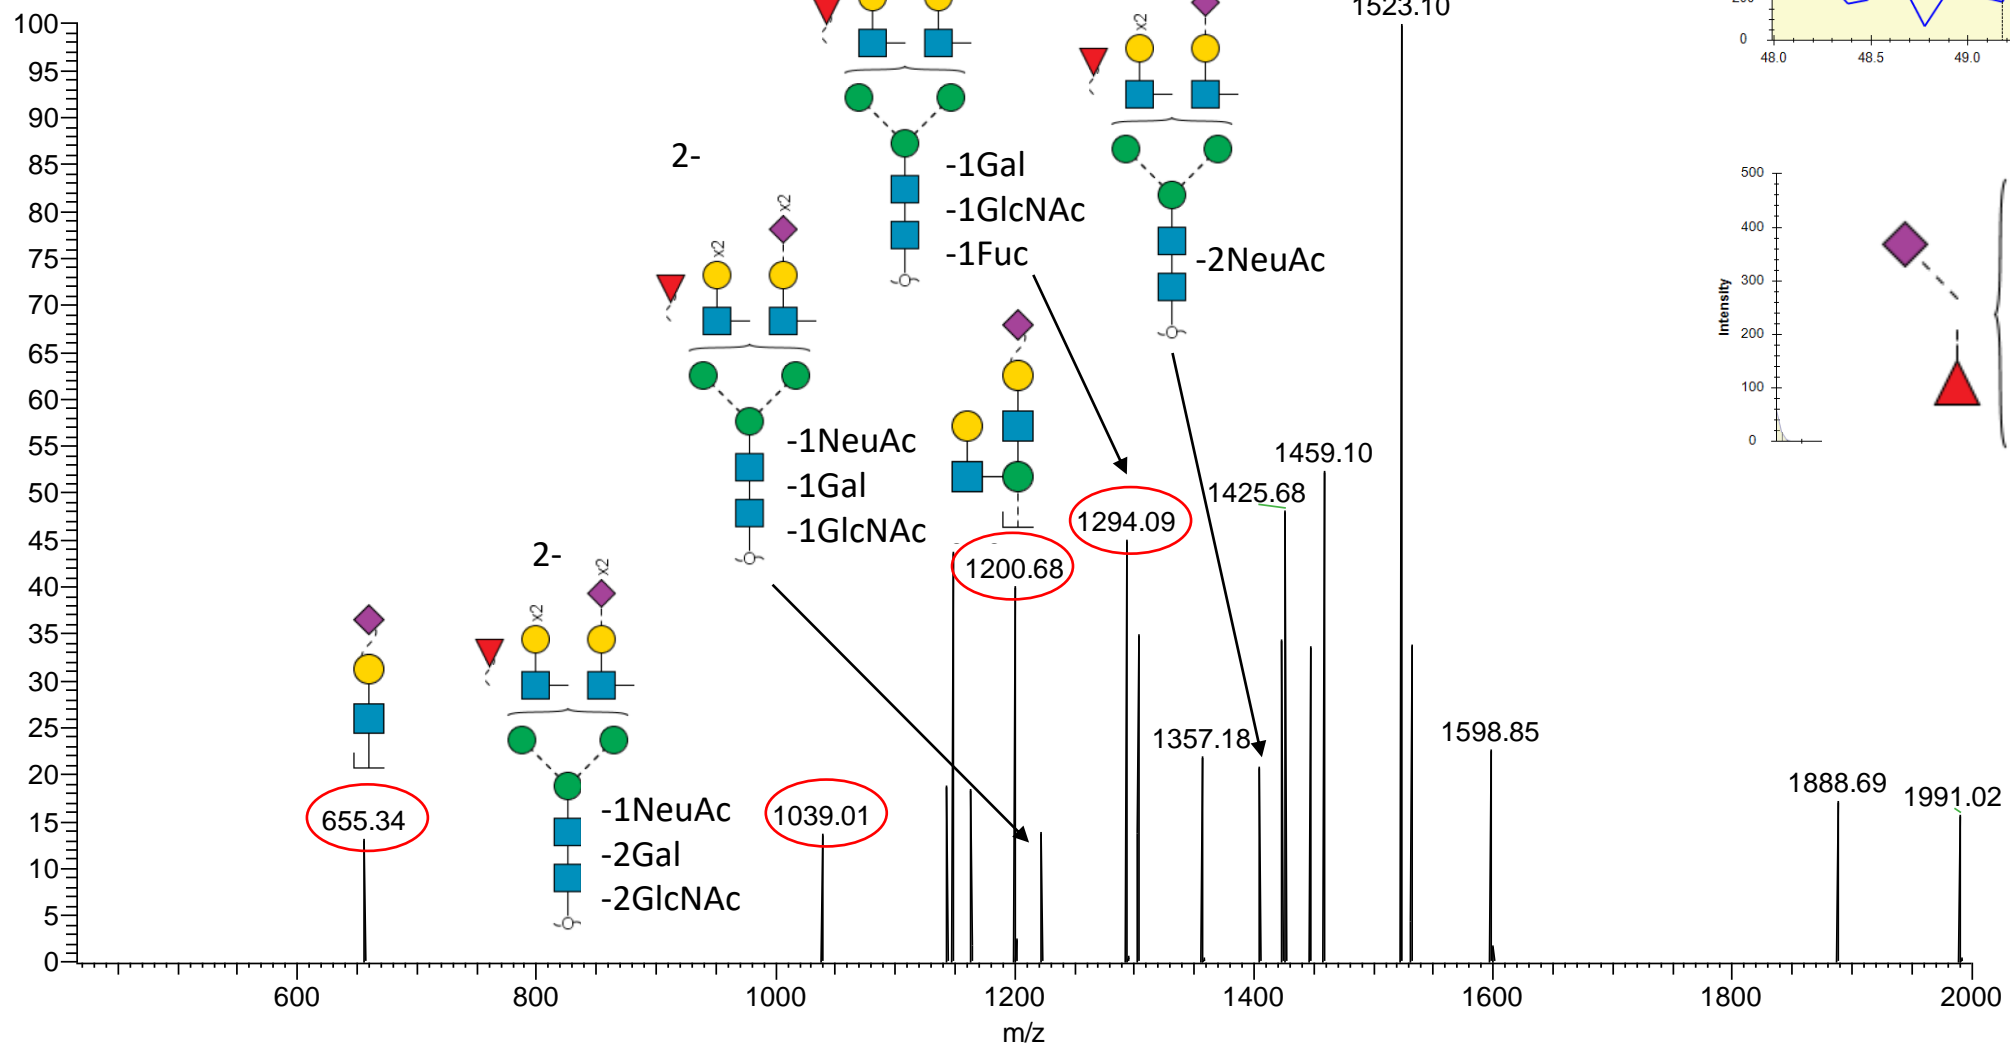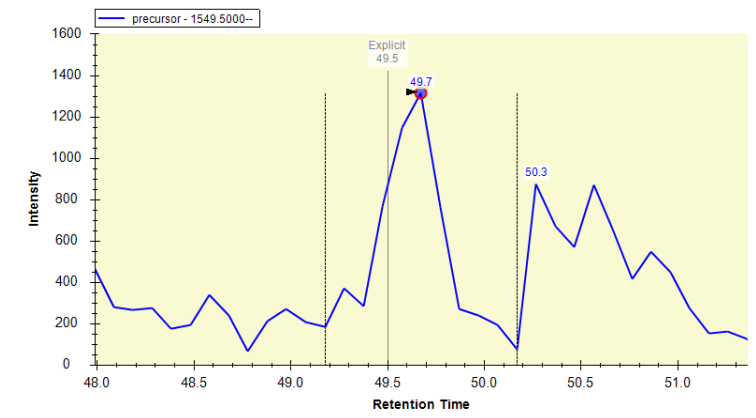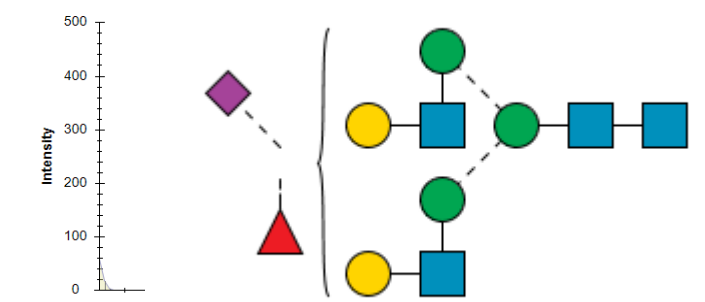

Note: Due to the lack of robust fragment ions, this glycan is annotated without known sialyl linkage isomer information and fucose position.

# Glycan #43b

Complex

Hex<sub>4</sub>HexNAc<sub>4</sub>NeuAc<sub>2</sub>Fuc<sub>1</sub>+ Hex<sub>3</sub>HexNAc<sub>2</sub>

*m/z*: 1549.7 (2-)

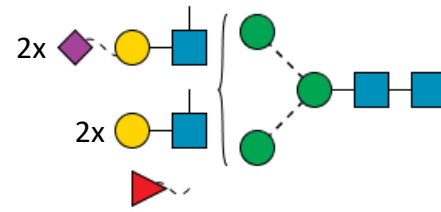

IL\_XB\_NG\_260717 #5160 RT: 52.20 AV: 1 NL: 9.20  
F: ITMS - p ESI d Full ms2 1550.17@cid35.00 [415.00-;

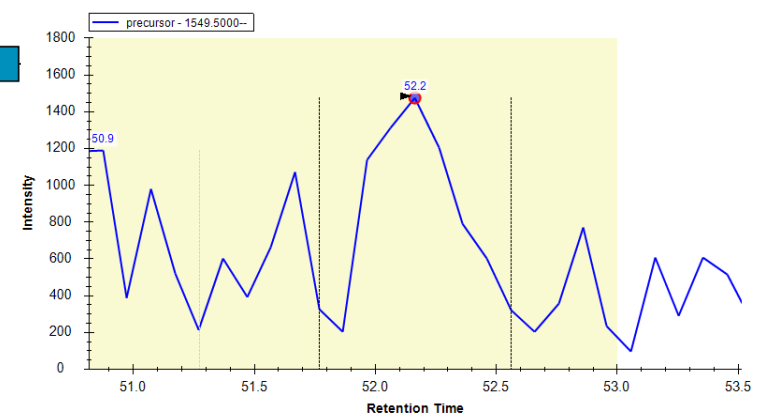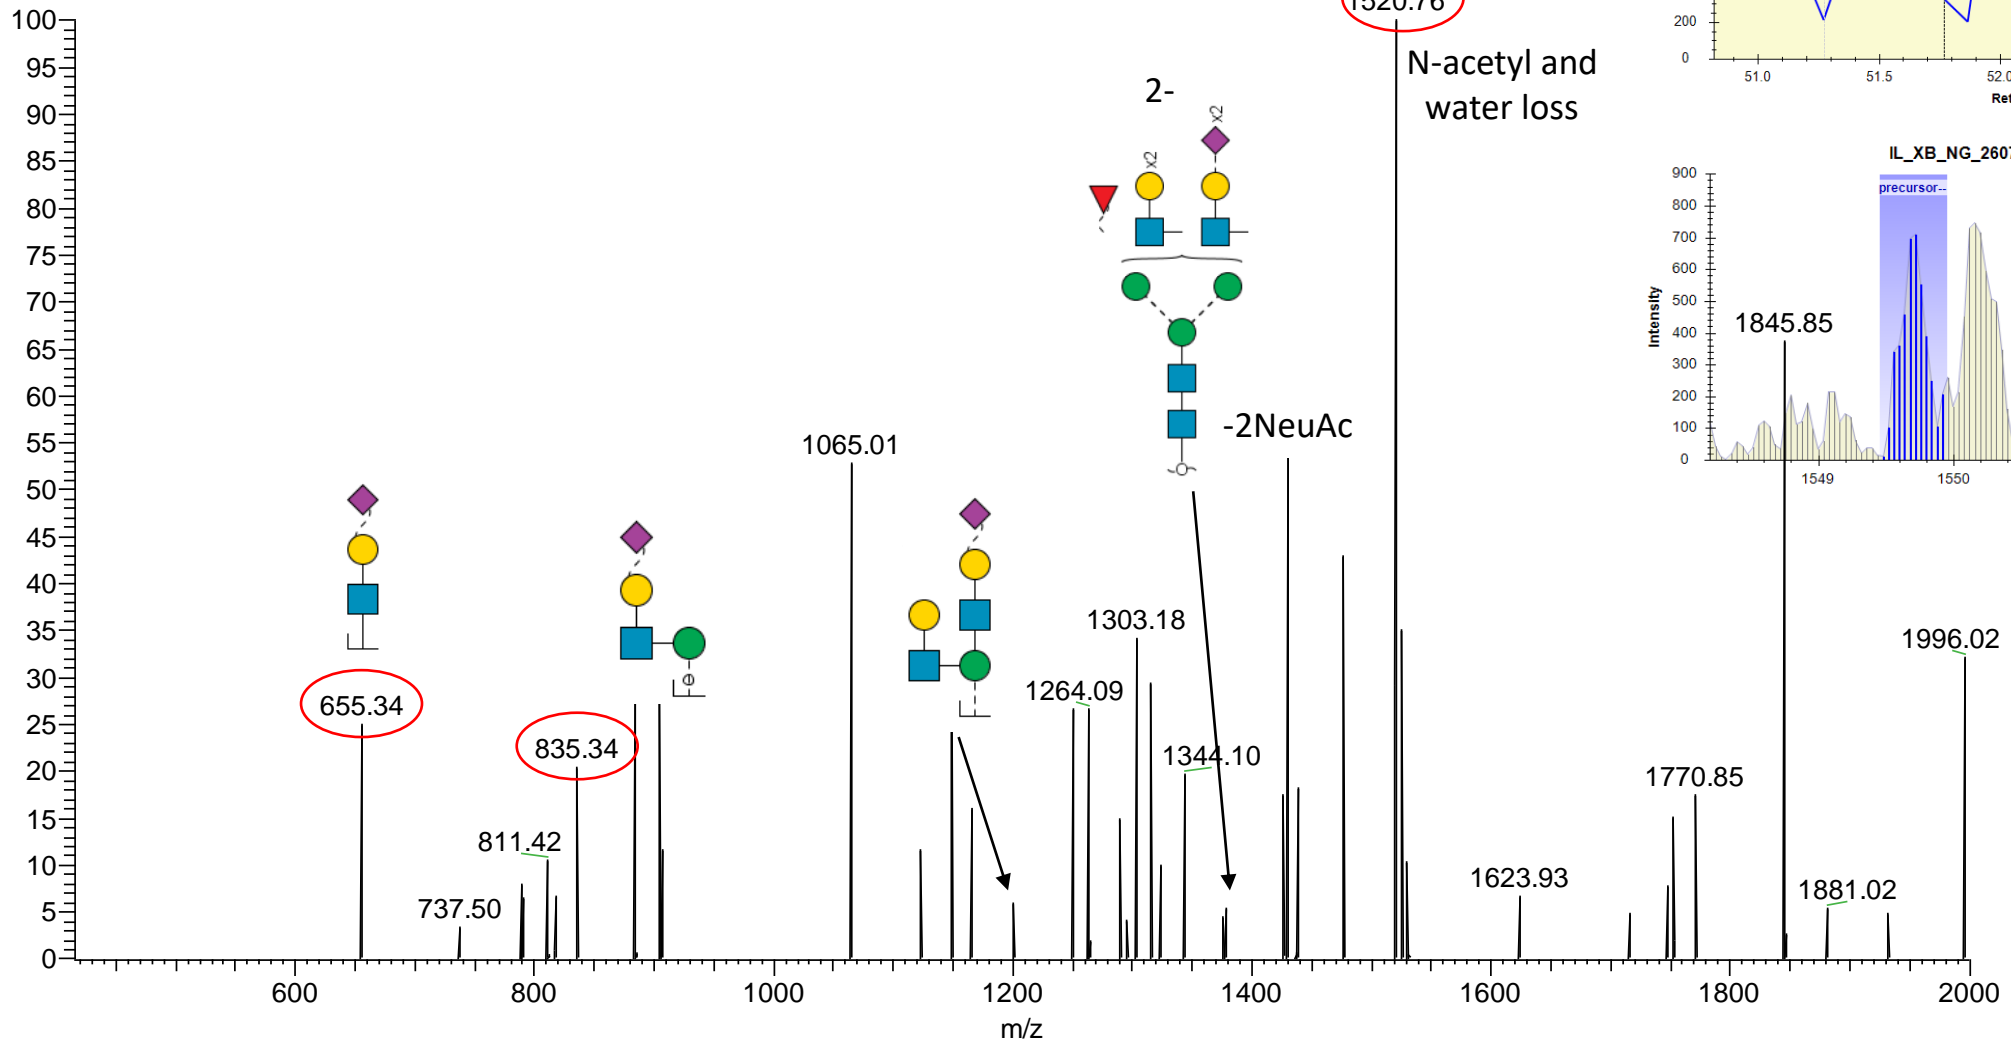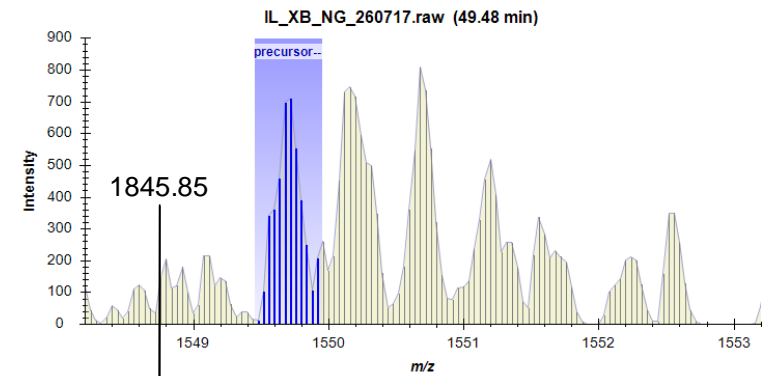

Note: Due to the lack of robust fragment ions, this glycan is annotated without known sialyl linkage isomer information and fucose position.

# Glycan #44a

Complex

Hex<sub>4</sub>HexNAc<sub>4</sub>NeuAc<sub>1</sub>Fuc<sub>2</sub>+ Hex<sub>3</sub>HexNAc<sub>2</sub>Fuc<sub>1</sub>

*m/z*: 1550.1<sup>(2-)</sup>

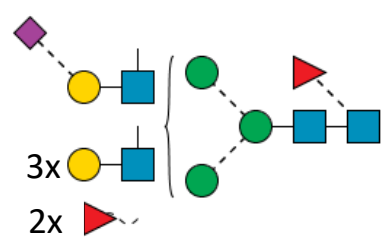

IL\_XB\_NG\_260717 #4429 RT: 44.51 AV: 1 NL: 1.32E1  
F: ITMS -p ESI d Full ms2 1550.17@cid35.00 [415.00-]

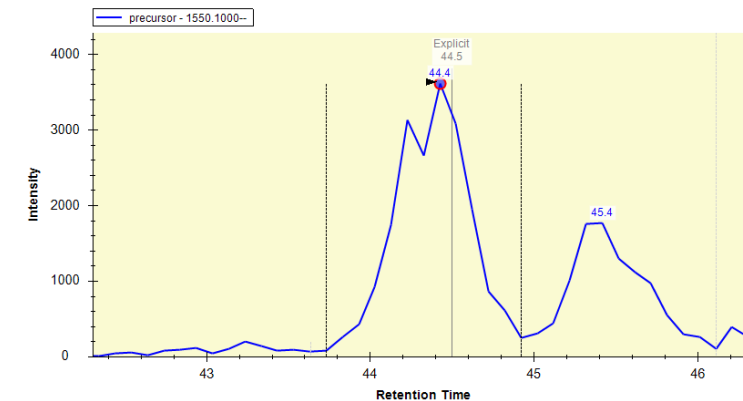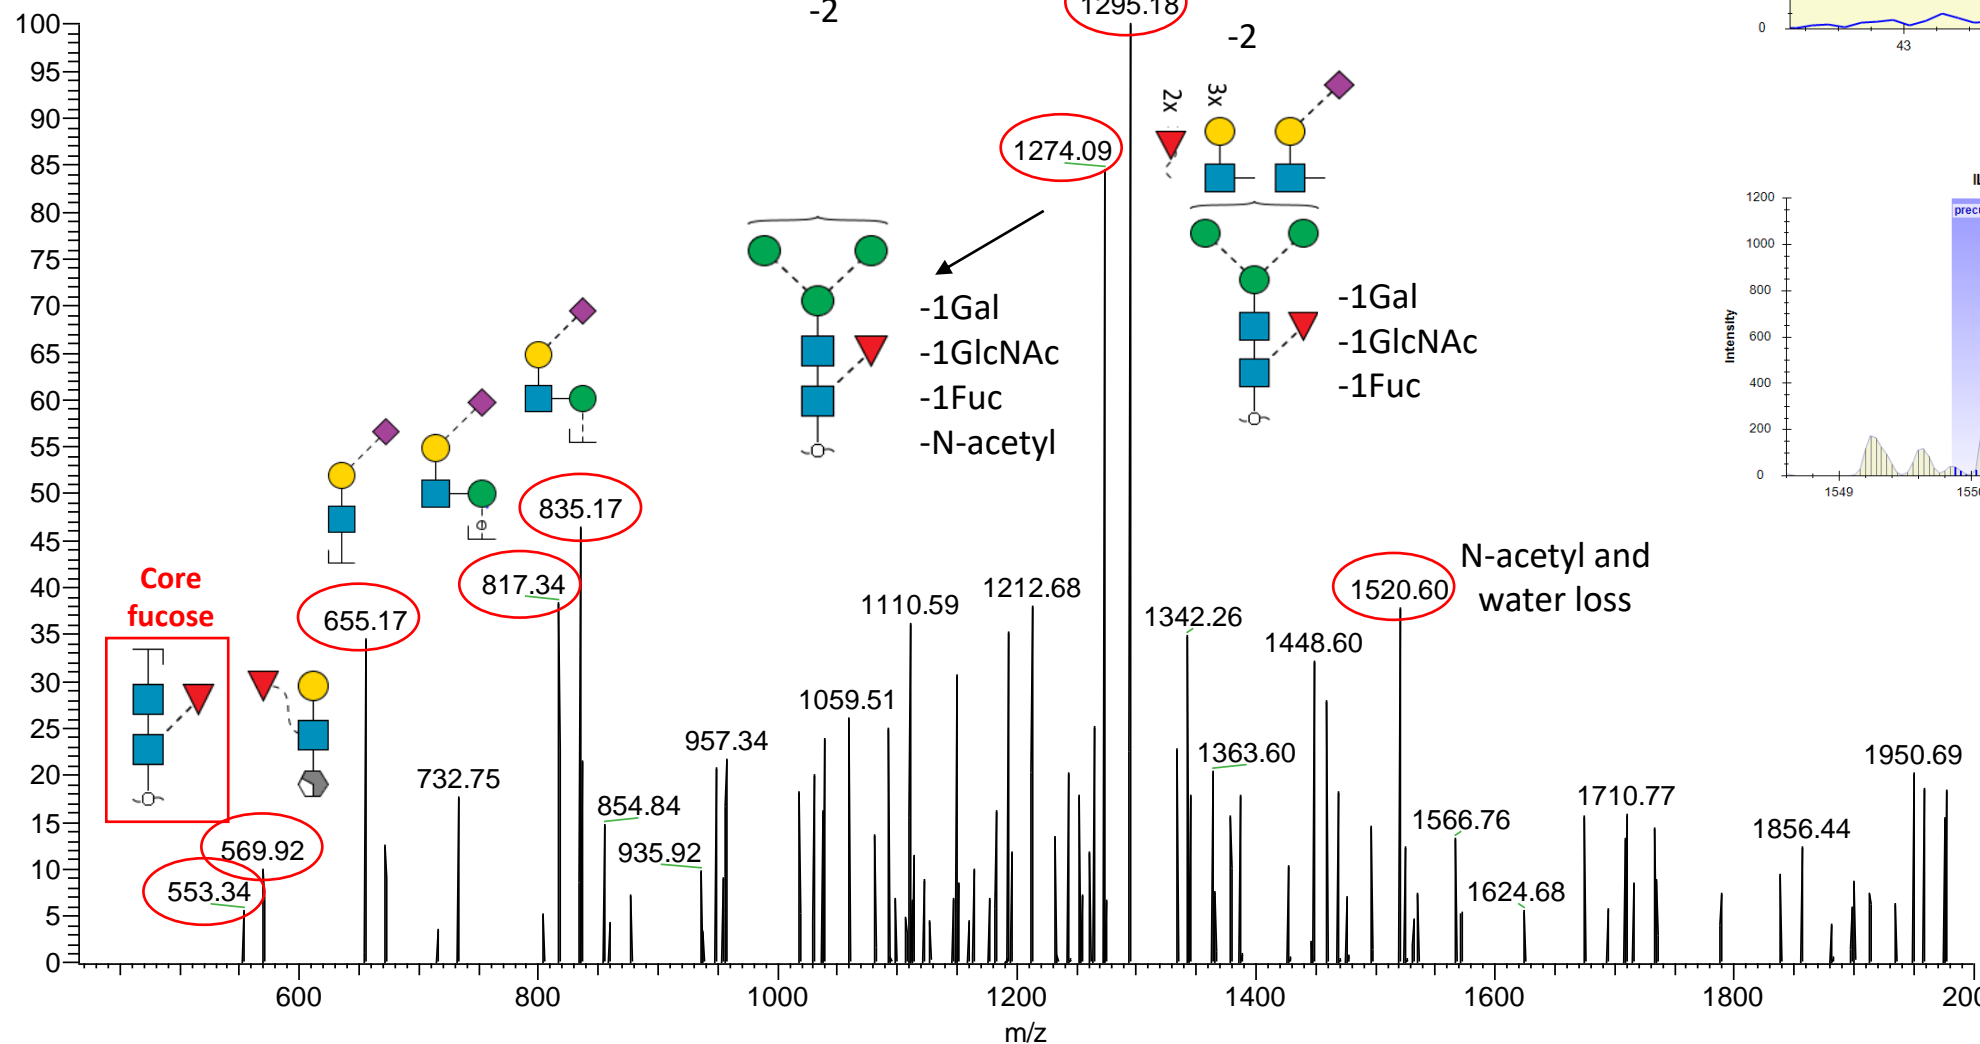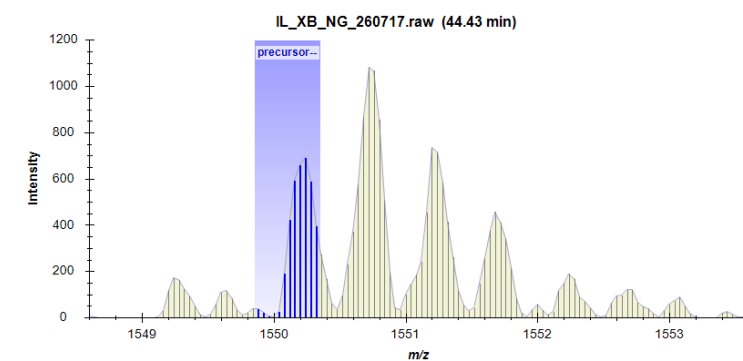

Note: Based on the early PGC-LC elution, this glycan is annotated as the  $\alpha$ 2,6-sialyl linkage isomer. Indication of core fucose. Due to the lack of robust fragment ions, this glycan is otherwise annotated without known sialyl linkage isomer information and fucose position.



# Glycan #44b

Complex

Hex<sub>4</sub>HexNAc<sub>4</sub>NeuAc<sub>1</sub>Fuc<sub>2</sub>+ Hex<sub>3</sub>HexNAc<sub>2</sub>Fuc<sub>1</sub>

*m/z*: 1550.1<sup>(2-)</sup>

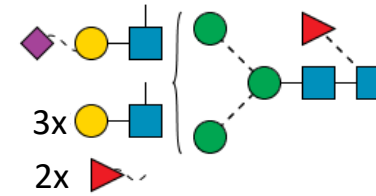

IL\_XB\_NG\_260717 #4652 RT: 46.84 AV: 1 NL: 7.88E1

F: ITMS - p ESI d Full ms2 1550.17@cid35.00 [415.00-;

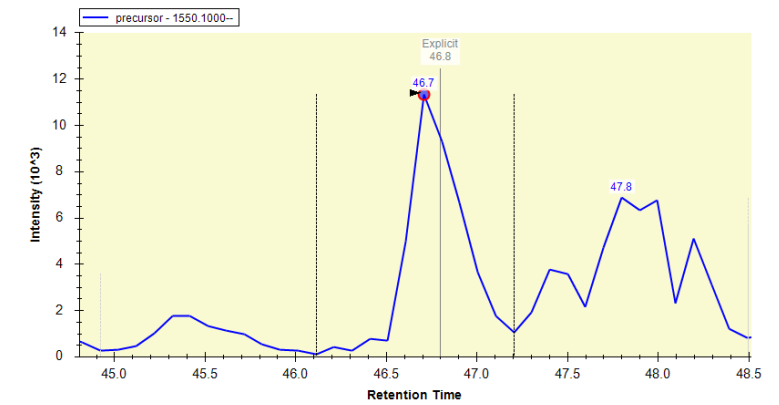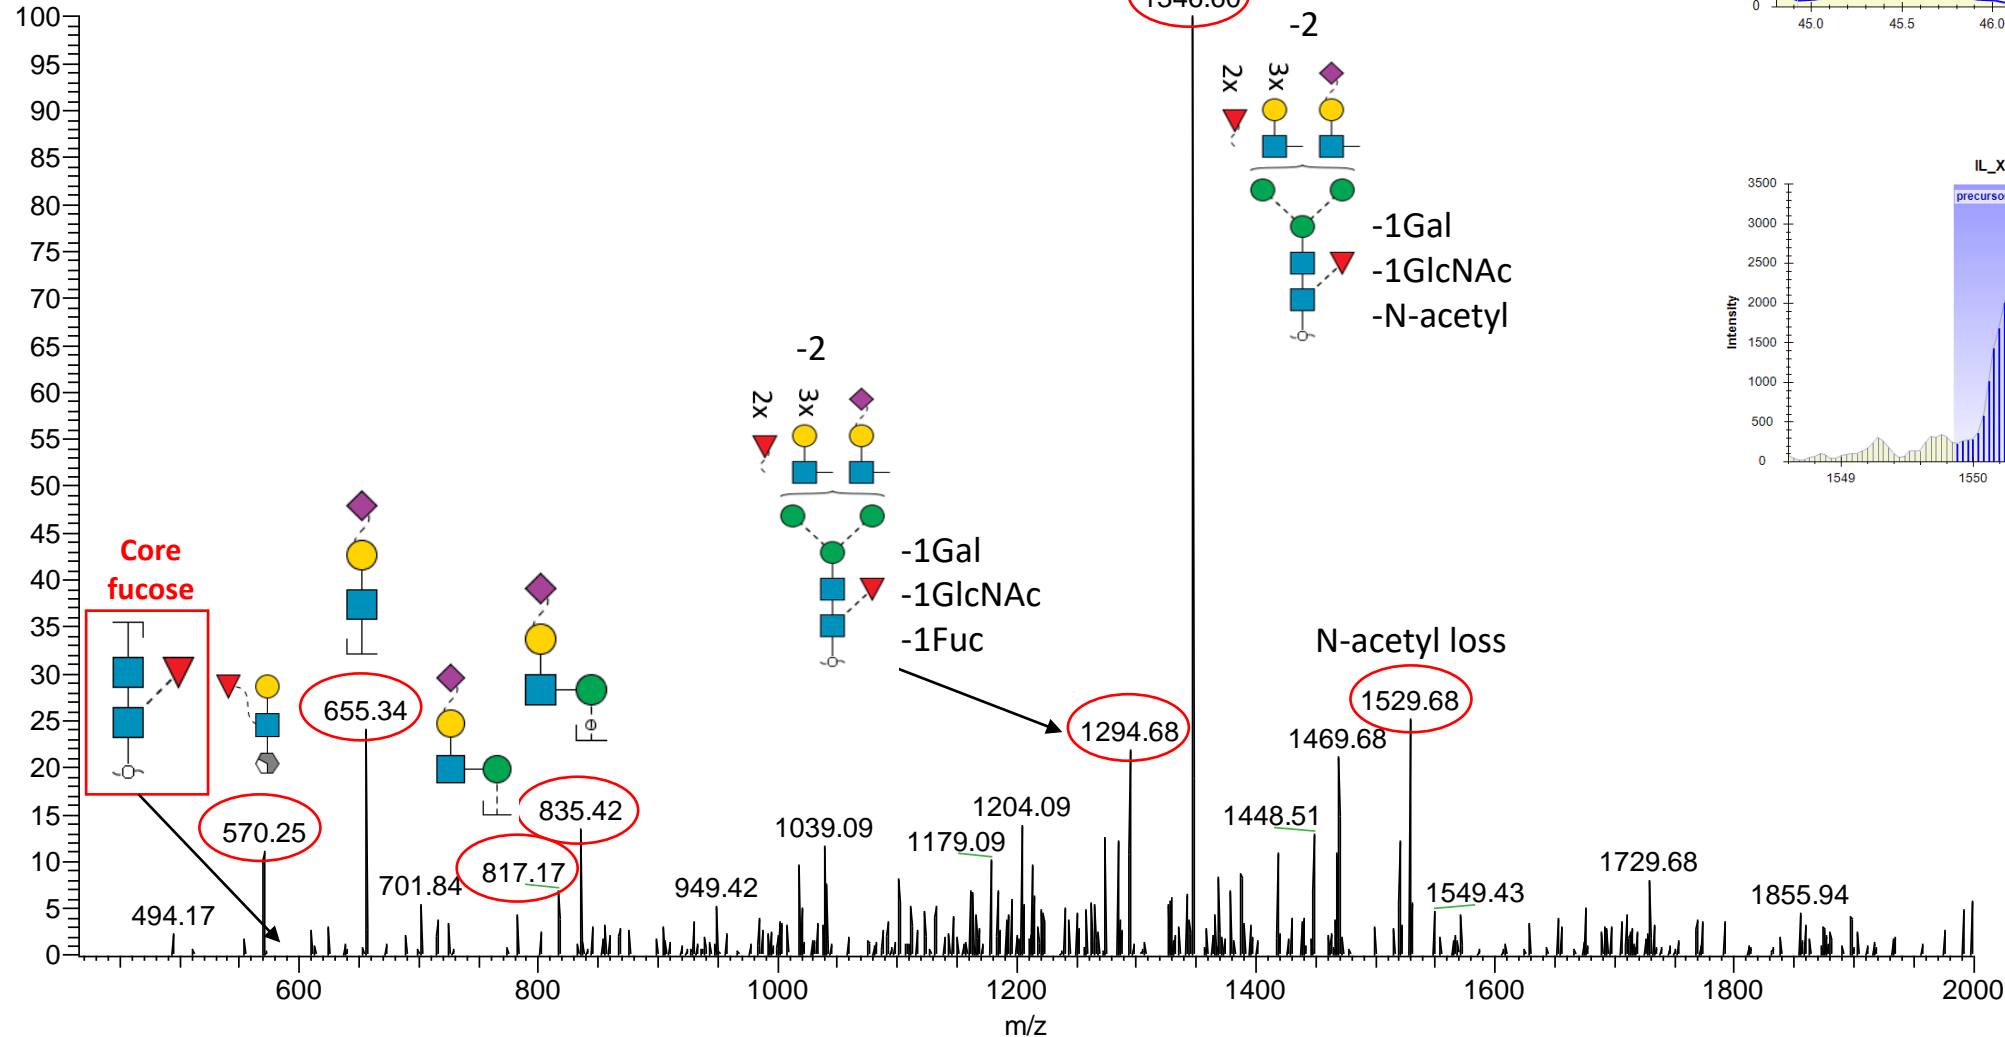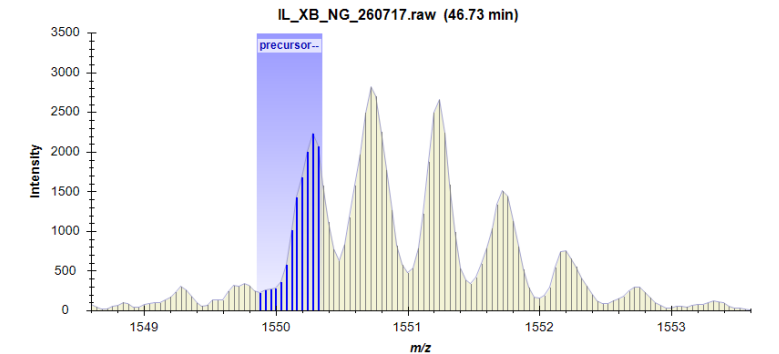

Note: Indication of core fucose. Due to the lack of robust fragment ions, this glycan is otherwise annotated without known sialyl linkage isomer information and fucose position.

# Glycan #44c

Complex

Hex<sub>4</sub>HexNAc<sub>4</sub>NeuAc<sub>1</sub>Fuc<sub>2</sub>+ Hex<sub>3</sub>HexNAc<sub>2</sub>Fuc<sub>1</sub>

*m/z*: 1550.1<sup>(2-)</sup>

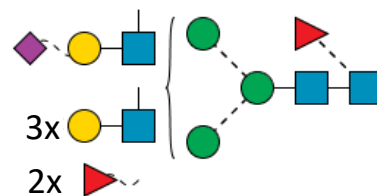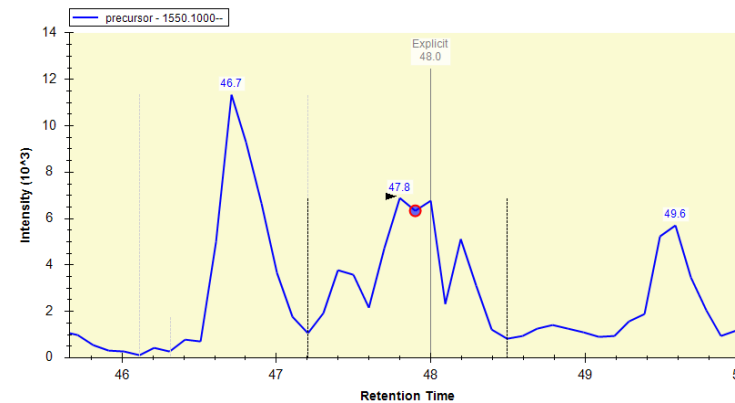

IL\_XB\_NG\_260717 #4769 RT: 48.08 AV: 1 NL: 7.28

F: ITMS - p ESI d Full ms2 1550.17@cid35.00 [415.00-]

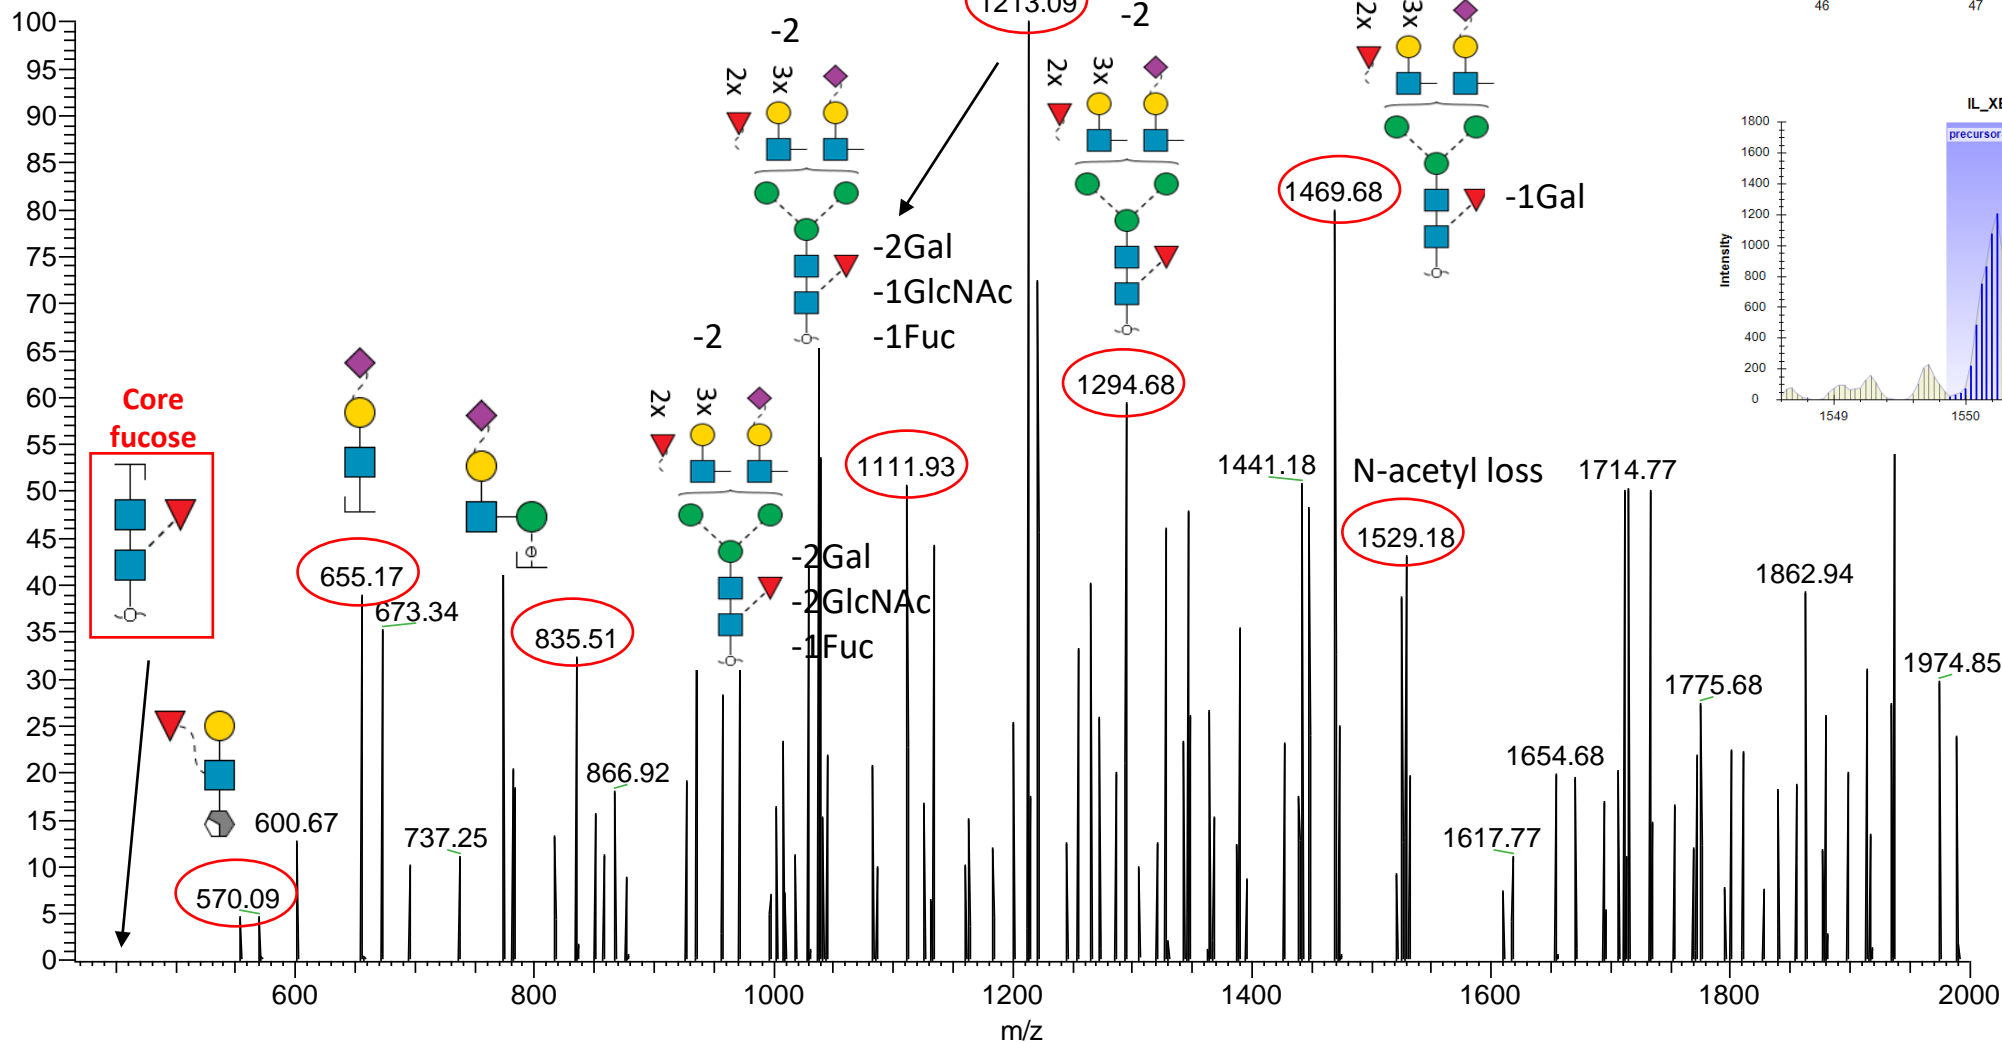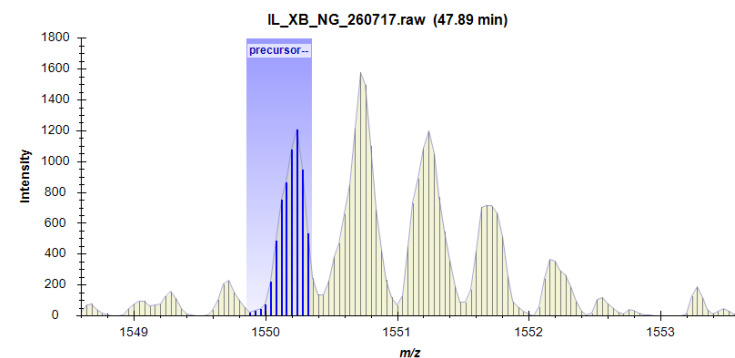

Note: Indication of core fucose. Due to the lack of robust fragment ions, this glycan is otherwise annotated without known sialyl linkage isomer information and fucose position.

# Glycan #45

Complex

Hex<sub>4</sub>HexNAc<sub>4</sub>NeuAc<sub>2</sub>Fuc<sub>2</sub> + Hex<sub>3</sub>HexNAc<sub>2</sub>

*m/z*: 1622.7<sup>(2-)</sup>

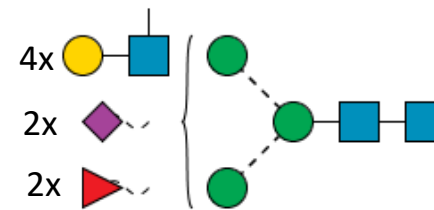

IL\_XB\_NG\_260717 #4995 RT: 50.47 AV: 1 NL: 5.97  
F: ITMS - p ESI d Full ms2 1622.79@cid35.00 [435.00-;

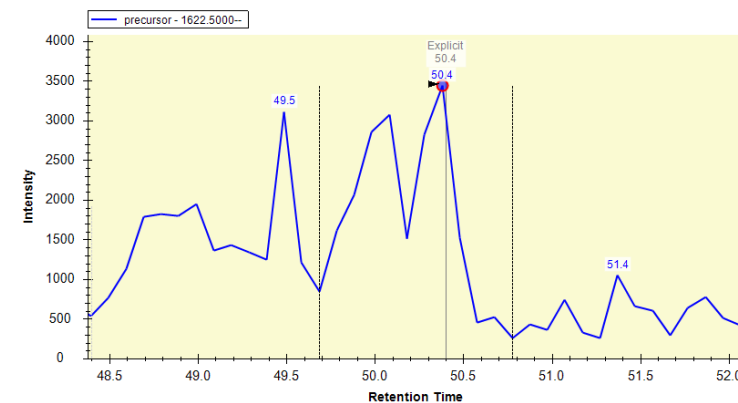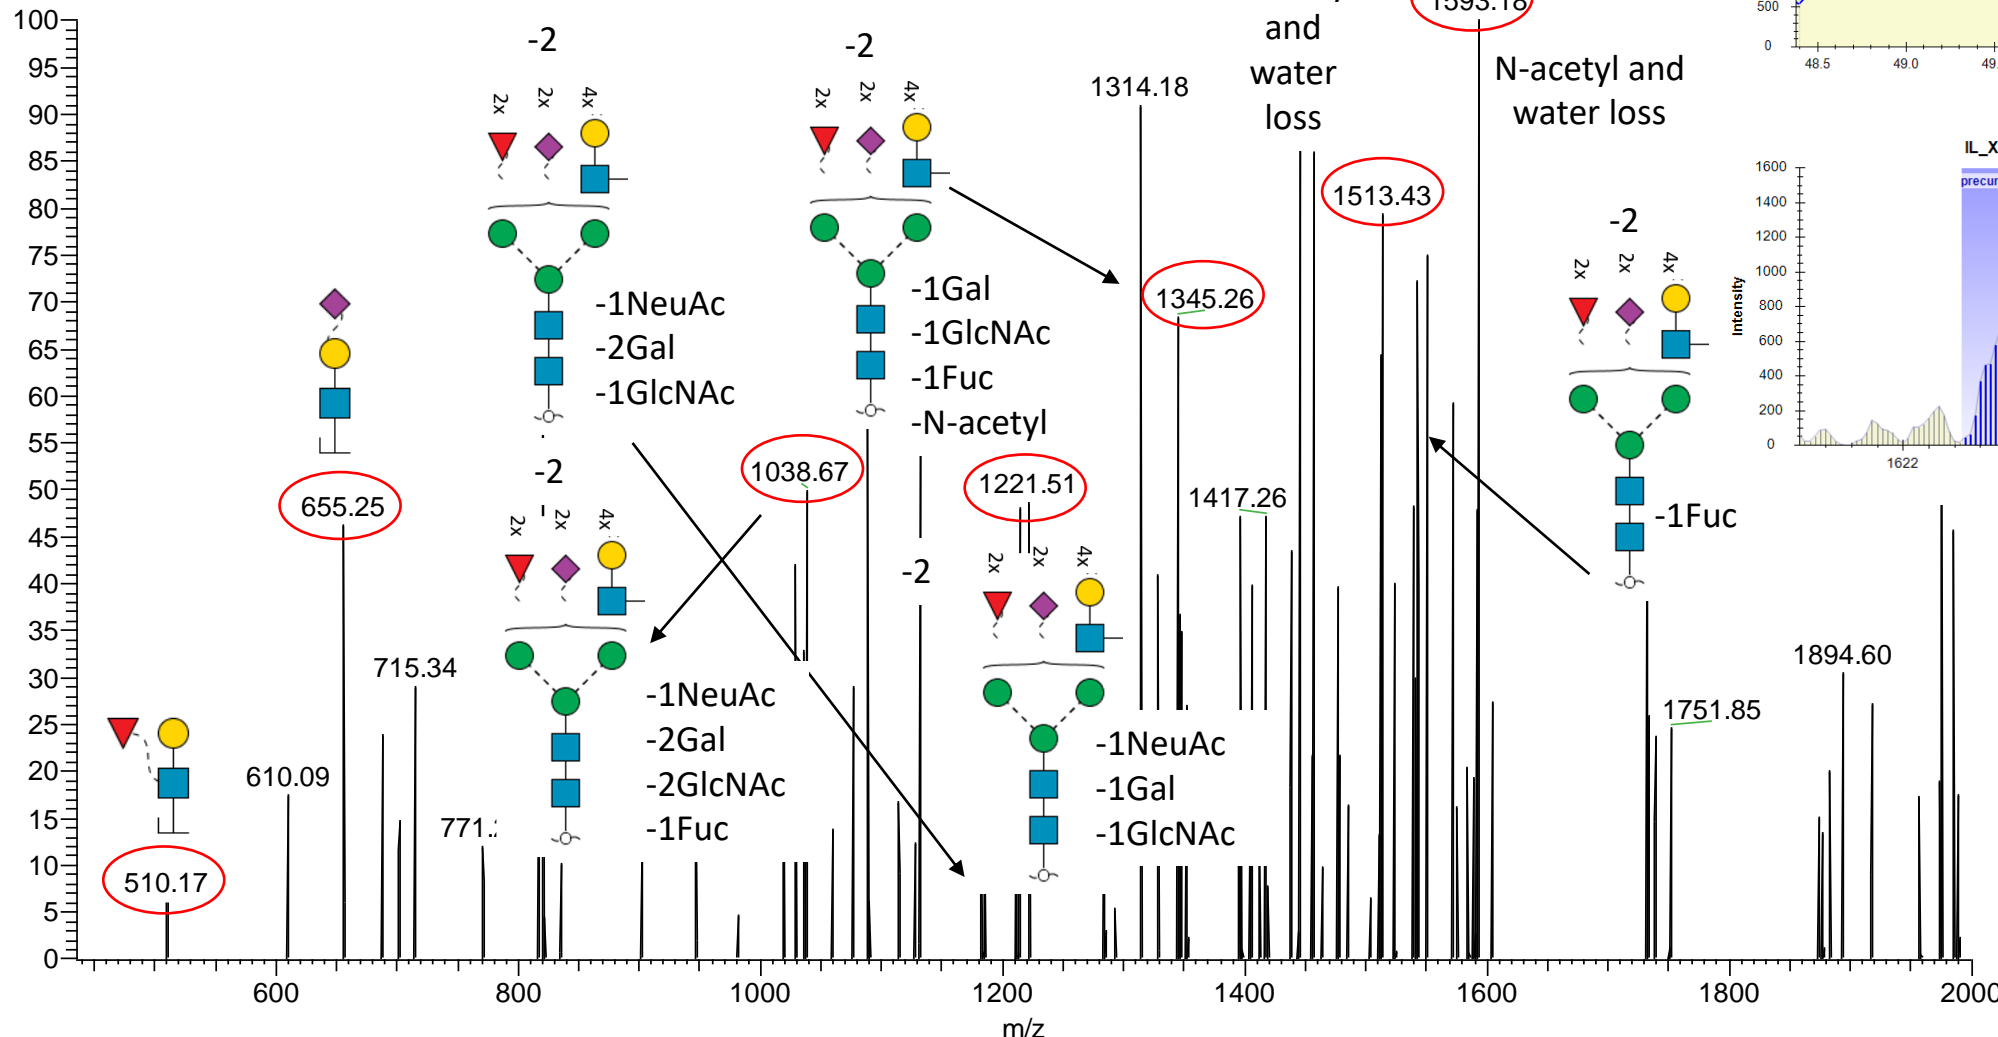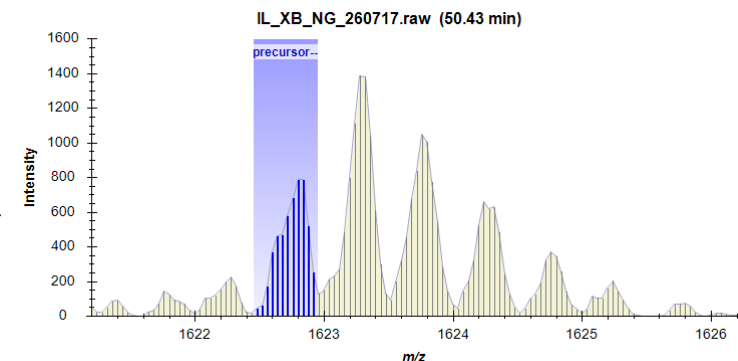

Note: Due to the lack of robust fragment ions, this glycan is otherwise annotated without known sialyl linkage isomer information and fucose position.

# Glycan #46a

Complex

Hex<sub>4</sub>HexNAc<sub>4</sub>NeuAc<sub>1</sub>Fuc<sub>3</sub> + Hex<sub>3</sub>HexNAc<sub>2</sub>Fuc<sub>1</sub>

*m/z*: 1623.1 (2-)

IL\_ZB\_NG\_260717 #4390 RT: 44.02 AV: 1 NL: 5.78

F: ITMS - p ESI d Full ms2 1623.22@cid35.00 [435.00-]

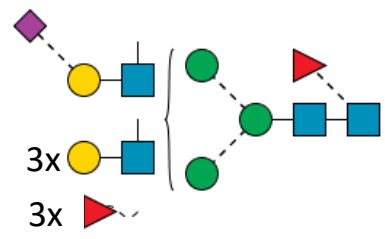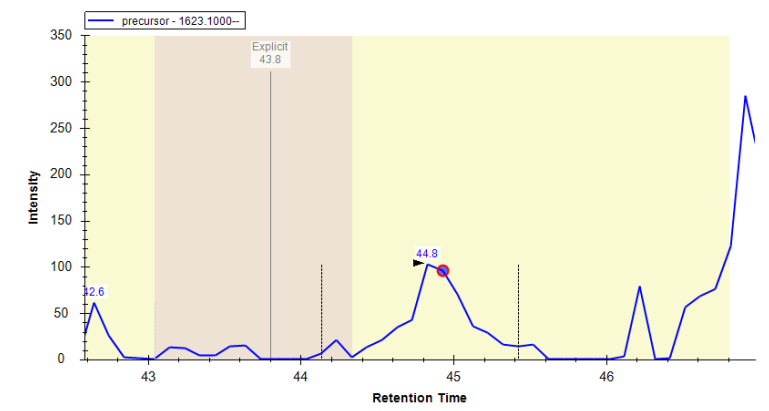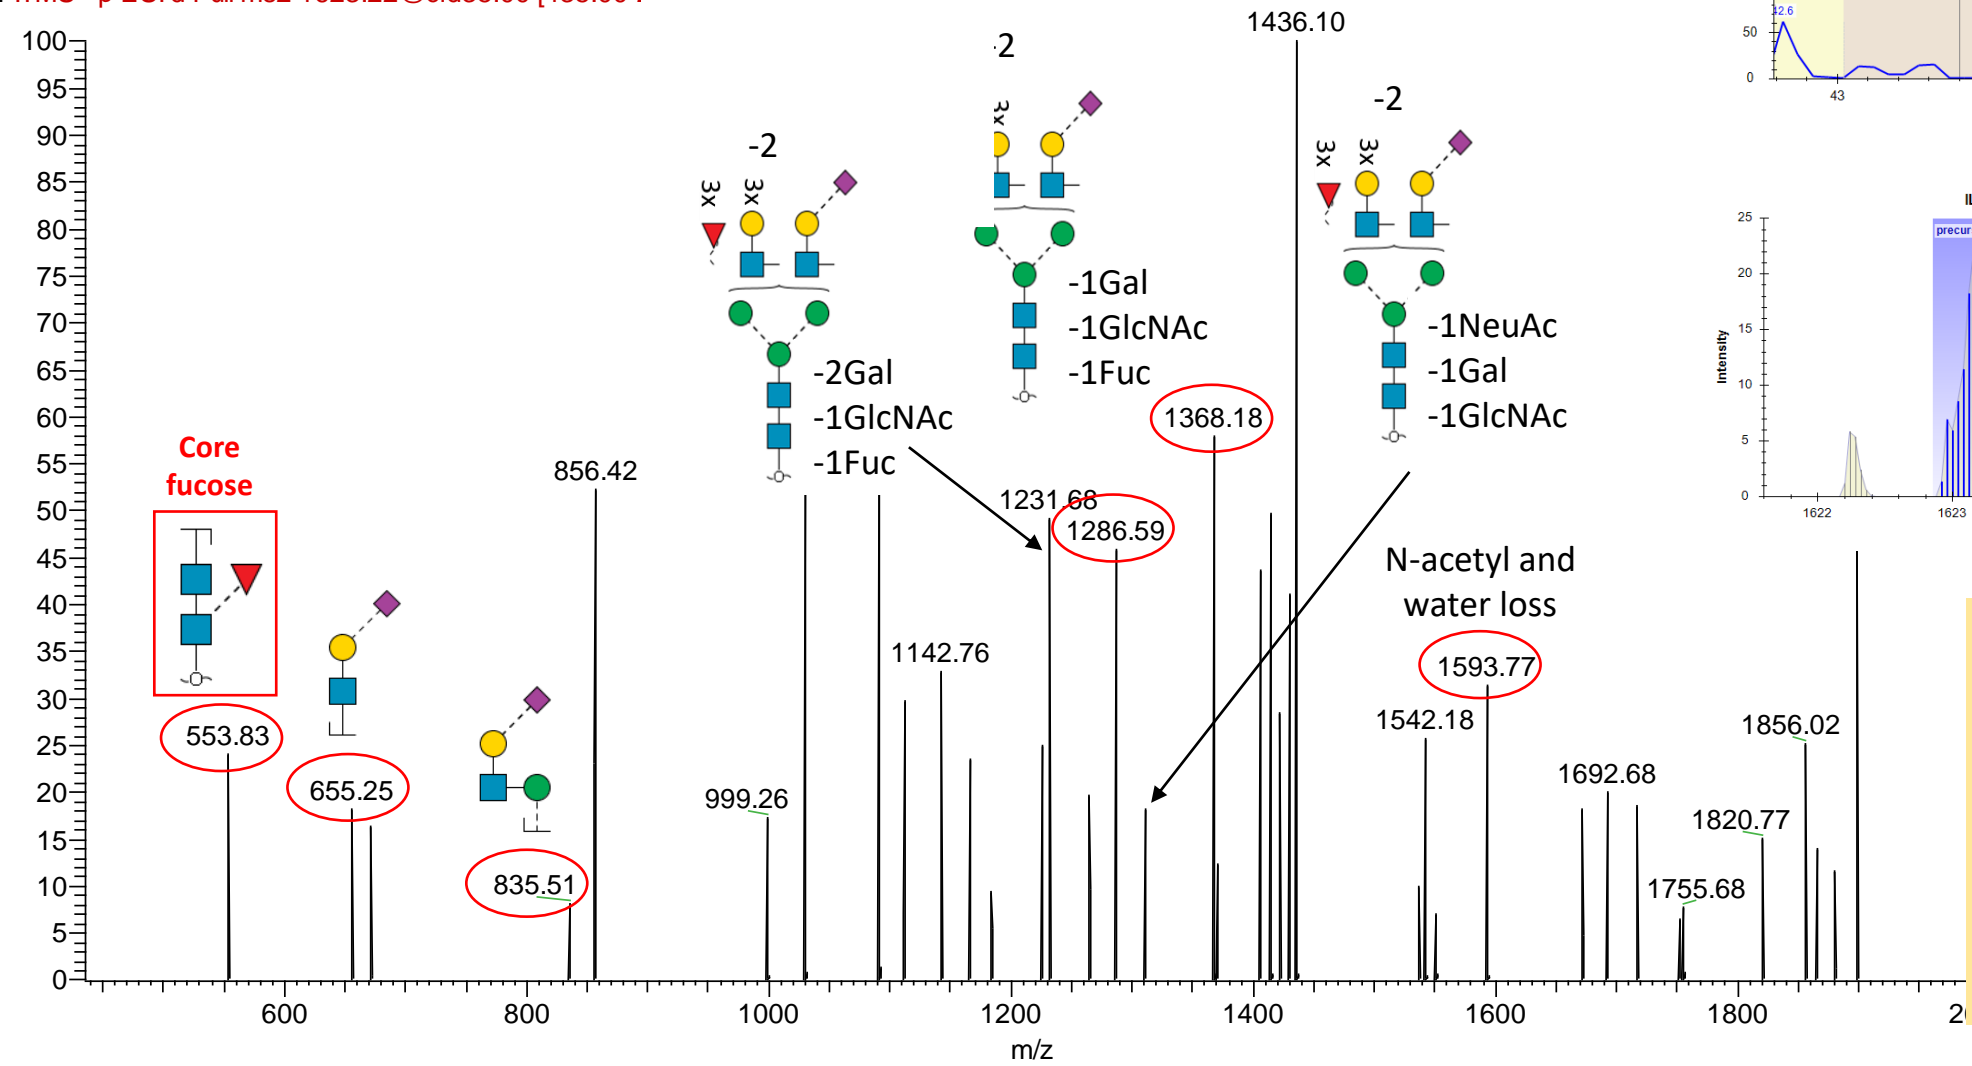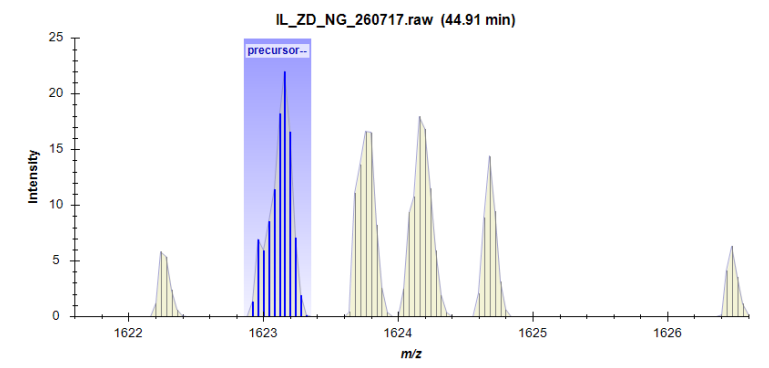

Note: Based on the early PGC-LC elution, this glycan is annotated as the  $\alpha$ 2,6-sialyl linkage isomer. Due to the lack of robust fragment ions, this glycan is otherwise annotated without known sialyl linkage isomer information and fucose position.

# Glycan #46b

Complex

Hex<sub>4</sub>HexNAc<sub>4</sub>NeuAc<sub>1</sub>Fuc<sub>4</sub> + Hex<sub>3</sub>HexNAc<sub>2</sub>

*m/z*: 1623.1 (2-)

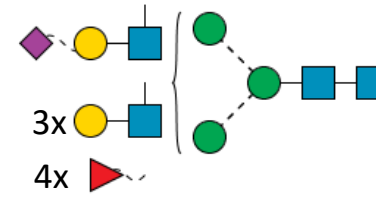

IL\_XB\_NG\_260717 #4626 RT: 46.57 AV: 1 NL: 4.21  
F: ITMS - p ESI d Full ms2 1623.23@cid35.00 [435.00-;

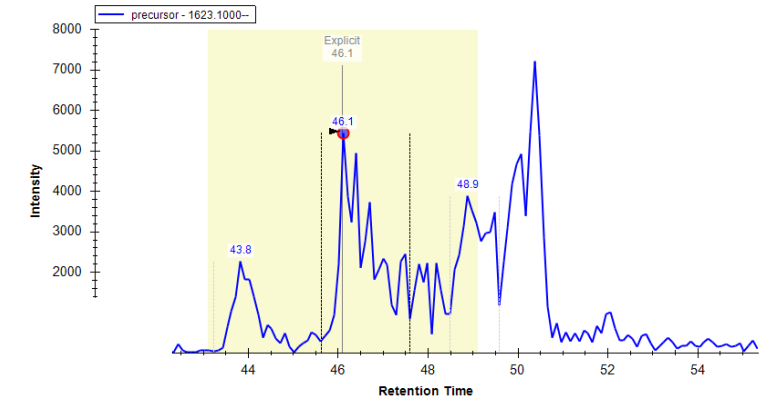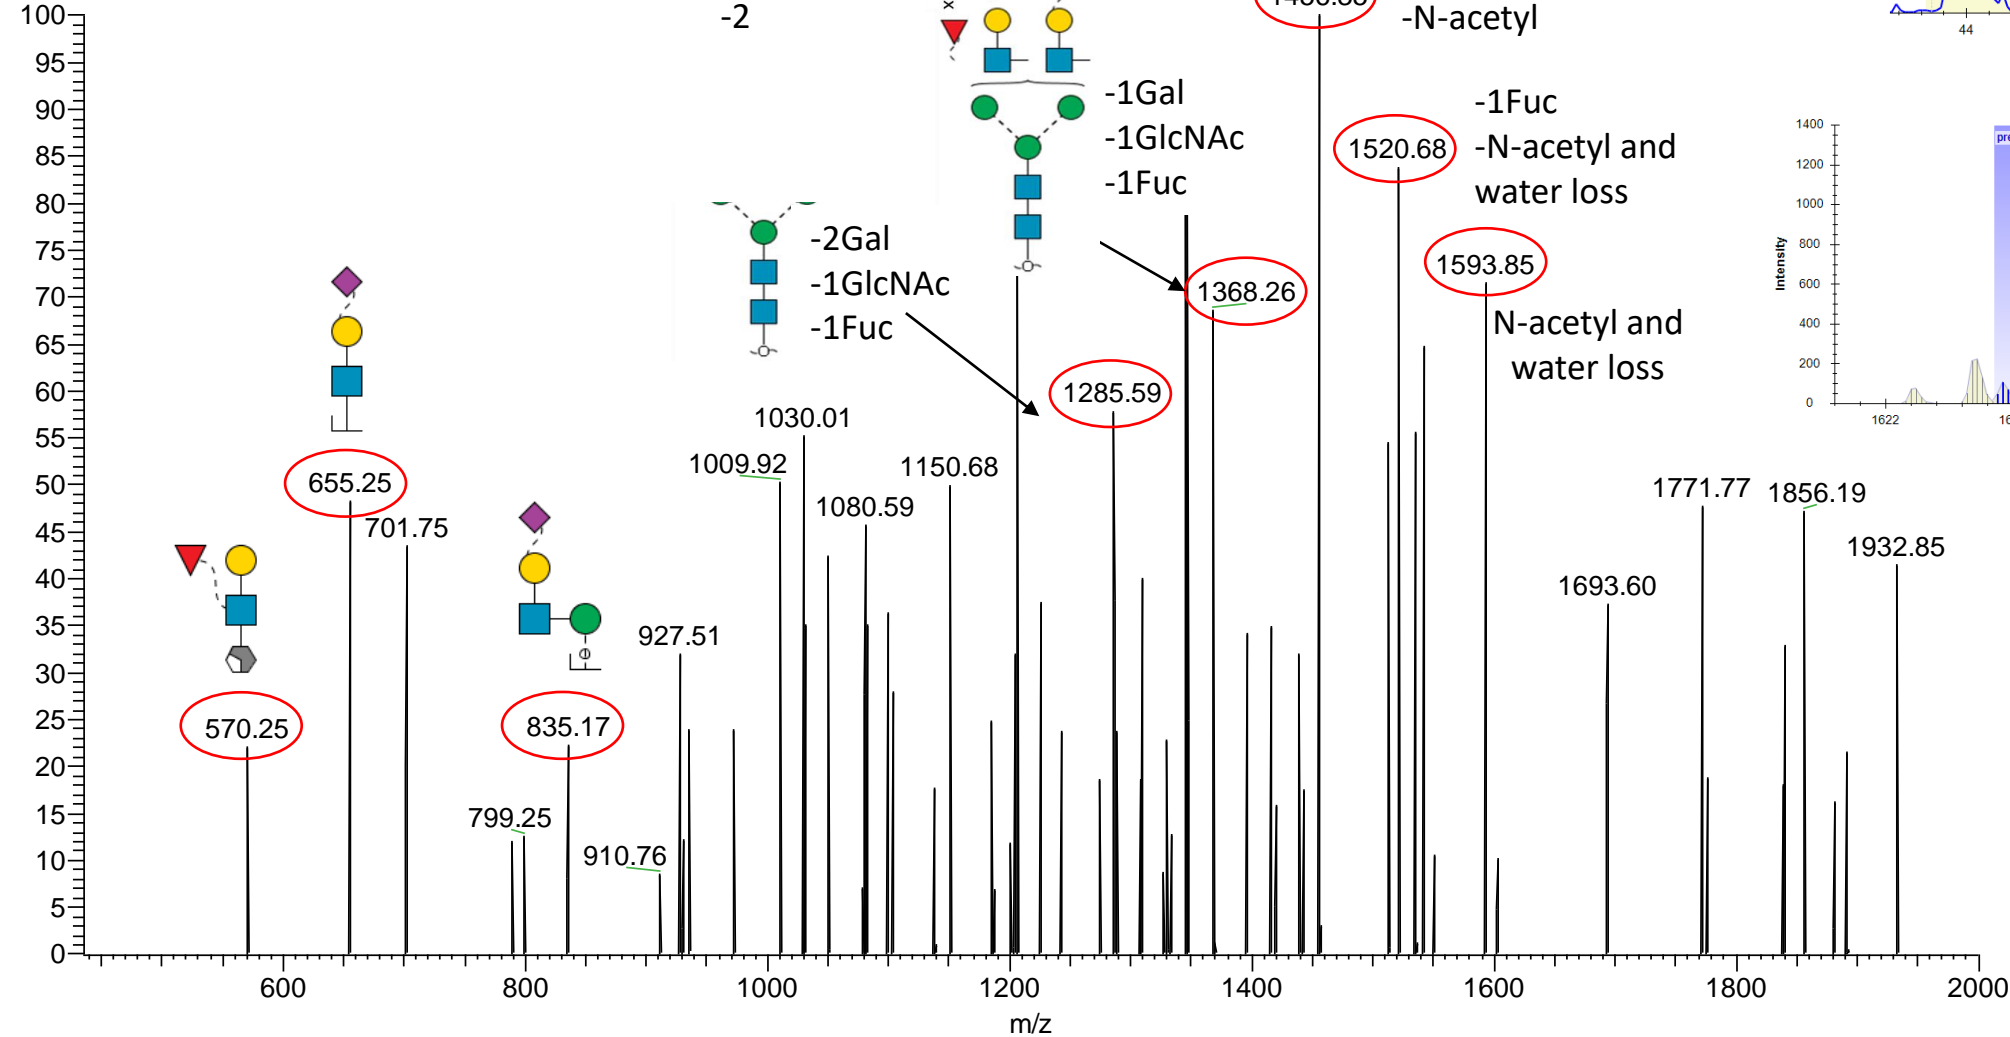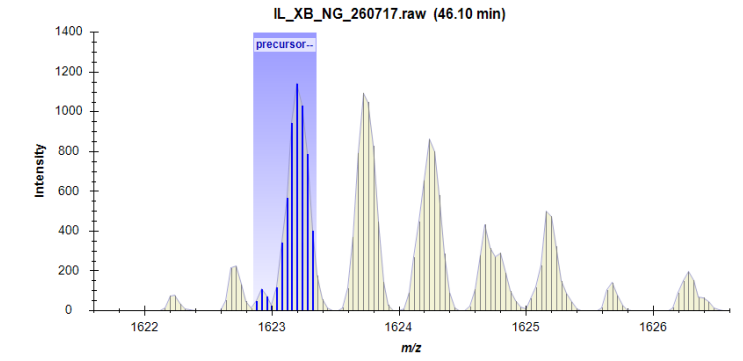

Note: Due to the lack of robust fragment ions, this glycan is annotated without known sialyl linkage isomer information and fucose position.

# Glycan #47

## Complex

Hex<sub>4</sub>HexNAc<sub>4</sub>NeuAc<sub>2</sub>Fuc<sub>3</sub> + Hex<sub>3</sub>HexNAc<sub>2</sub>

*m/z*: 1695.7 (2-)

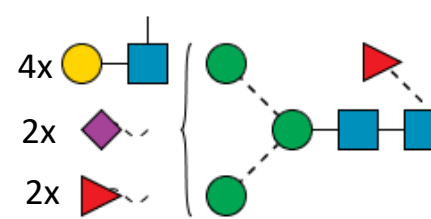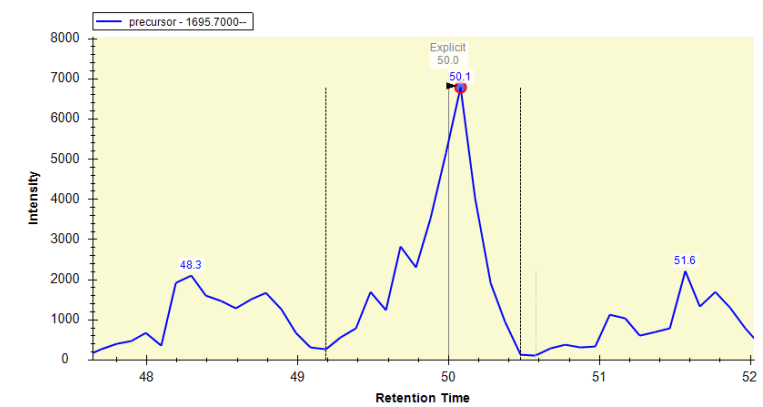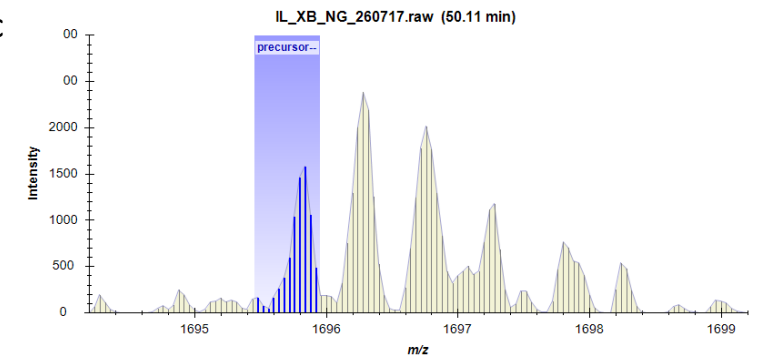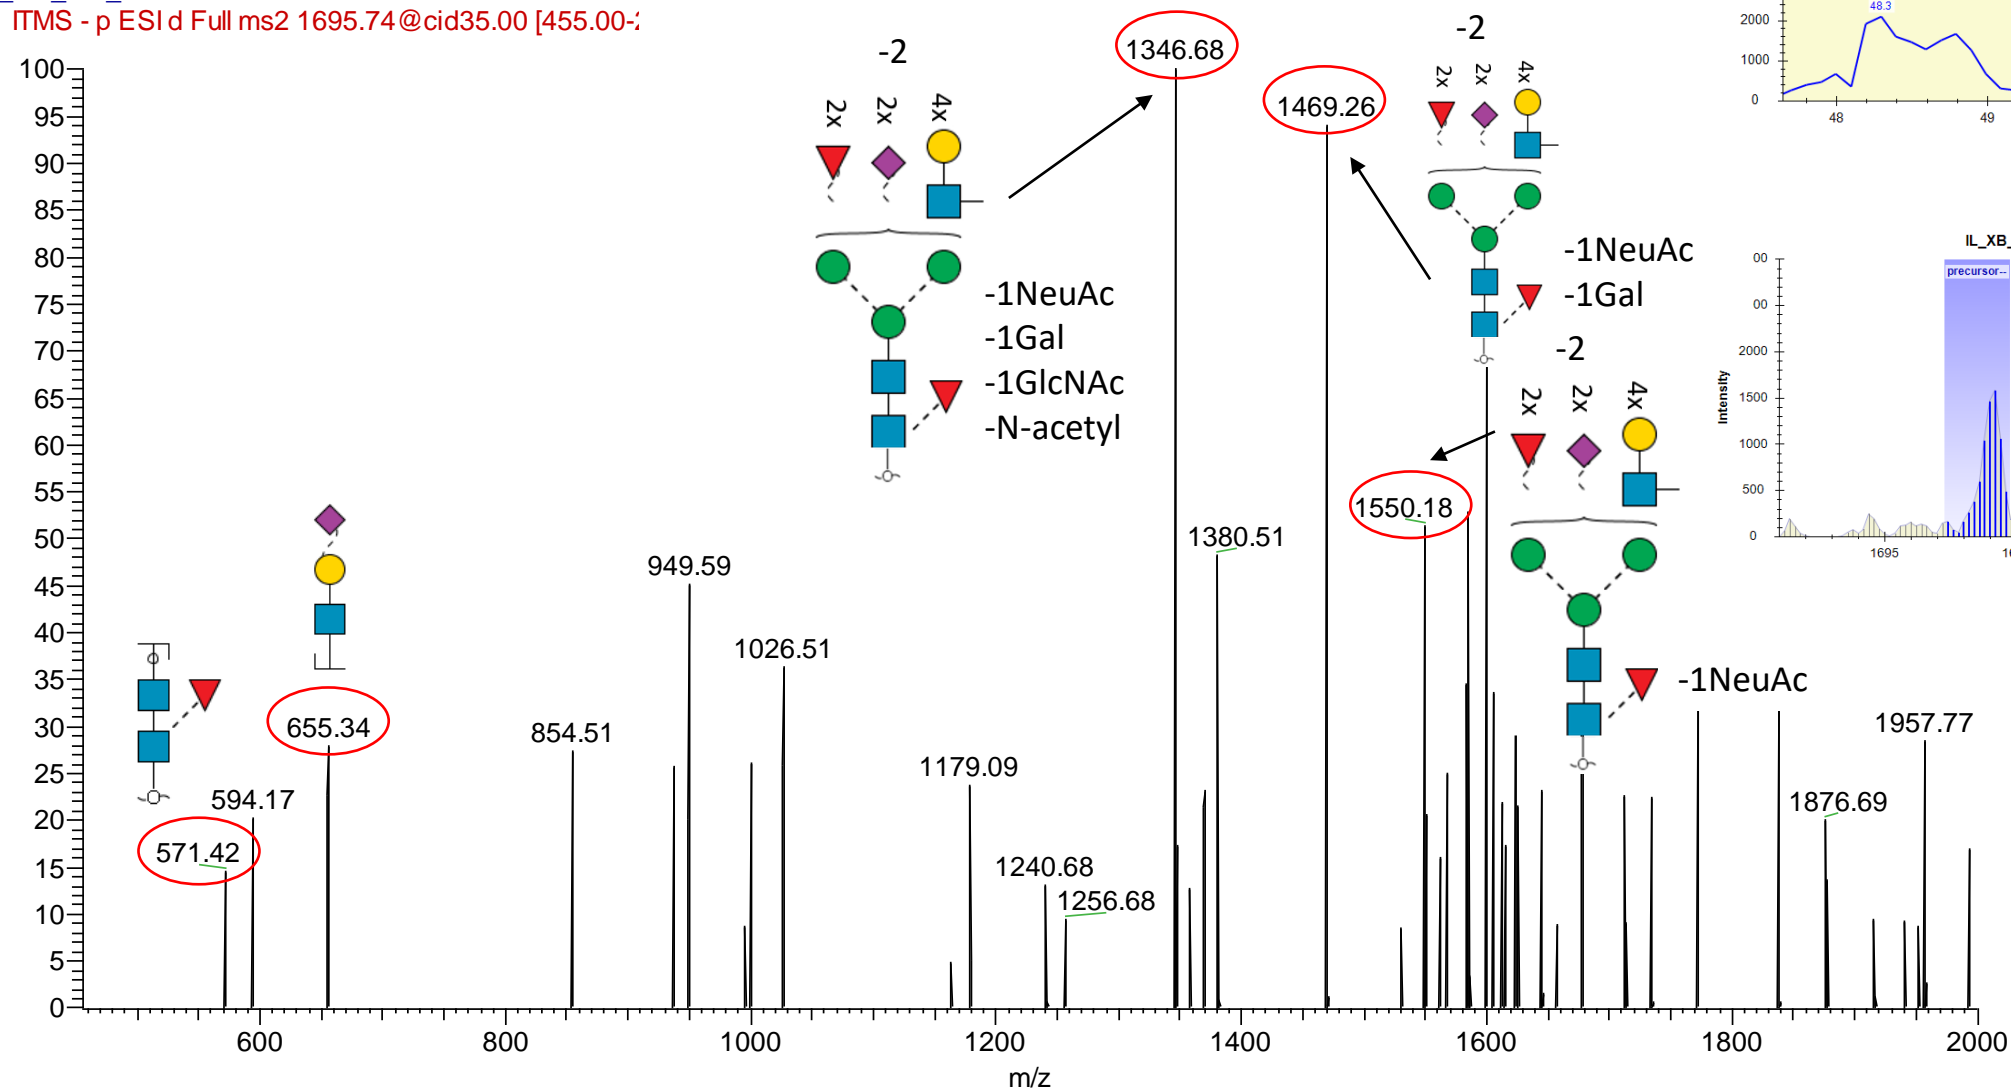

Note: Indication of core fucosylation. Due to the lack of robust fragment ions, this glycan is otherwise annotated without known sialyl linkage isomer information and fucose position.
